# Supplementary material for: Evaluation of Lipid Extraction Protocols for Untargeted Analysis of Mouse Tissue Lipidome
Source: MDPI journal article supplement (doi:10.3390/metabo13091002), 2023-09-09
Supplement: s1 [file s1]

## Supporting Information

# Evaluation of Lipid Extraction Protocols for Untargeted Analysis of Mouse Tissue Lipidome

Ashraf M. Omar<sup>1</sup> and Qibin Zhang<sup>1,2,\*</sup>

<sup>1</sup> Center for Translational Biomedical Research, University of North Carolina at Greensboro, North Carolina Research Campus, Kannapolis, NC 28081, USA

<sup>2</sup> Department of Chemistry & Biochemistry, University of North Carolina at Greensboro, Greensboro, NC 27402, USA

\* Correspondence: q\_zhang2@uncg.edu

### Table of contents

|                                                                                                                                                                 |    |
|-----------------------------------------------------------------------------------------------------------------------------------------------------------------|----|
| <b>Figure S1.</b> The inter-assay coefficient of variation (CV%) of absolute concentrations of endogenous glycerolipids extracted by different methods          | P2 |
| <b>Figure S2.</b> The inter-assay coefficient of variation (CV%) of absolute concentrations of endogenous glycerophospholipids extracted by different methods   | P3 |
| <b>Figure S3.</b> The inter-assay coefficient of variation (CV%) of absolute concentrations of endogenous sphingolipids extracted by different methods          | P4 |
| <b>Figure S4.</b> The inter-assay coefficient of variation (CV%) of absolute concentrations of endogenous CE, AcCa, AEA, and CoQ extracted by different methods | P5 |

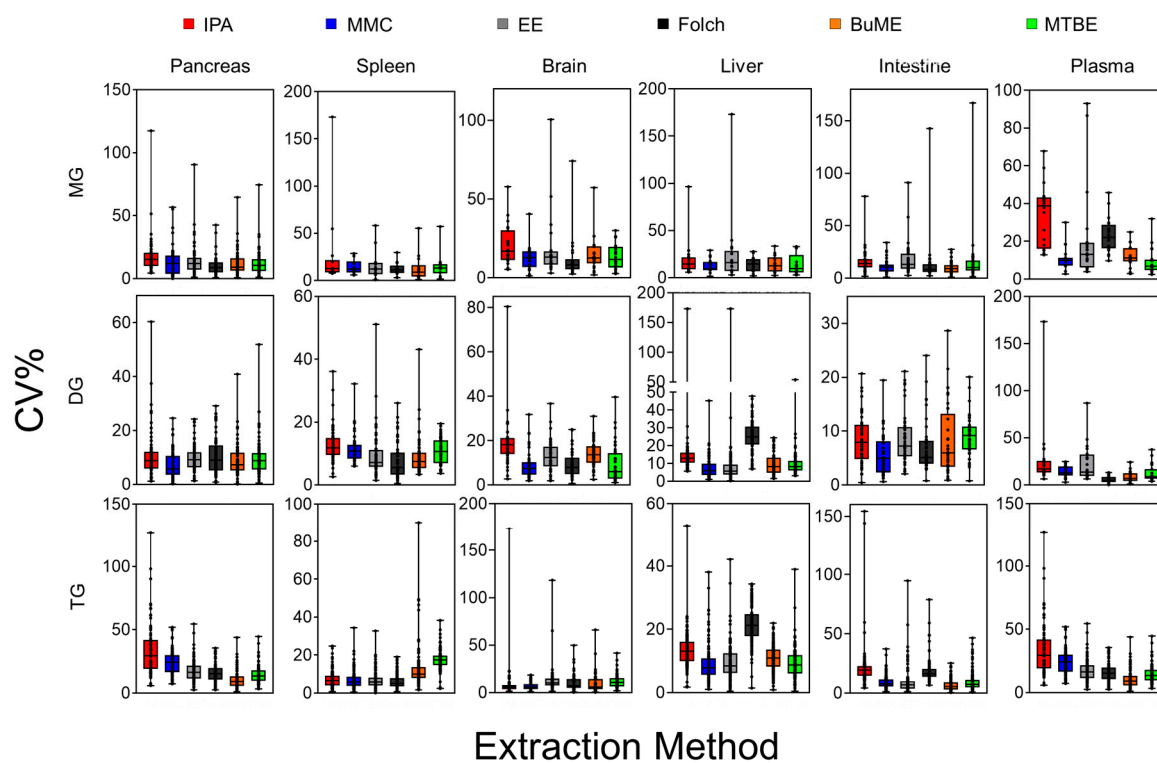

Figure S1. The inter-assay coefficient of variation (CV%) of absolute concentrations of endogenous glycerolipids extracted by different methods

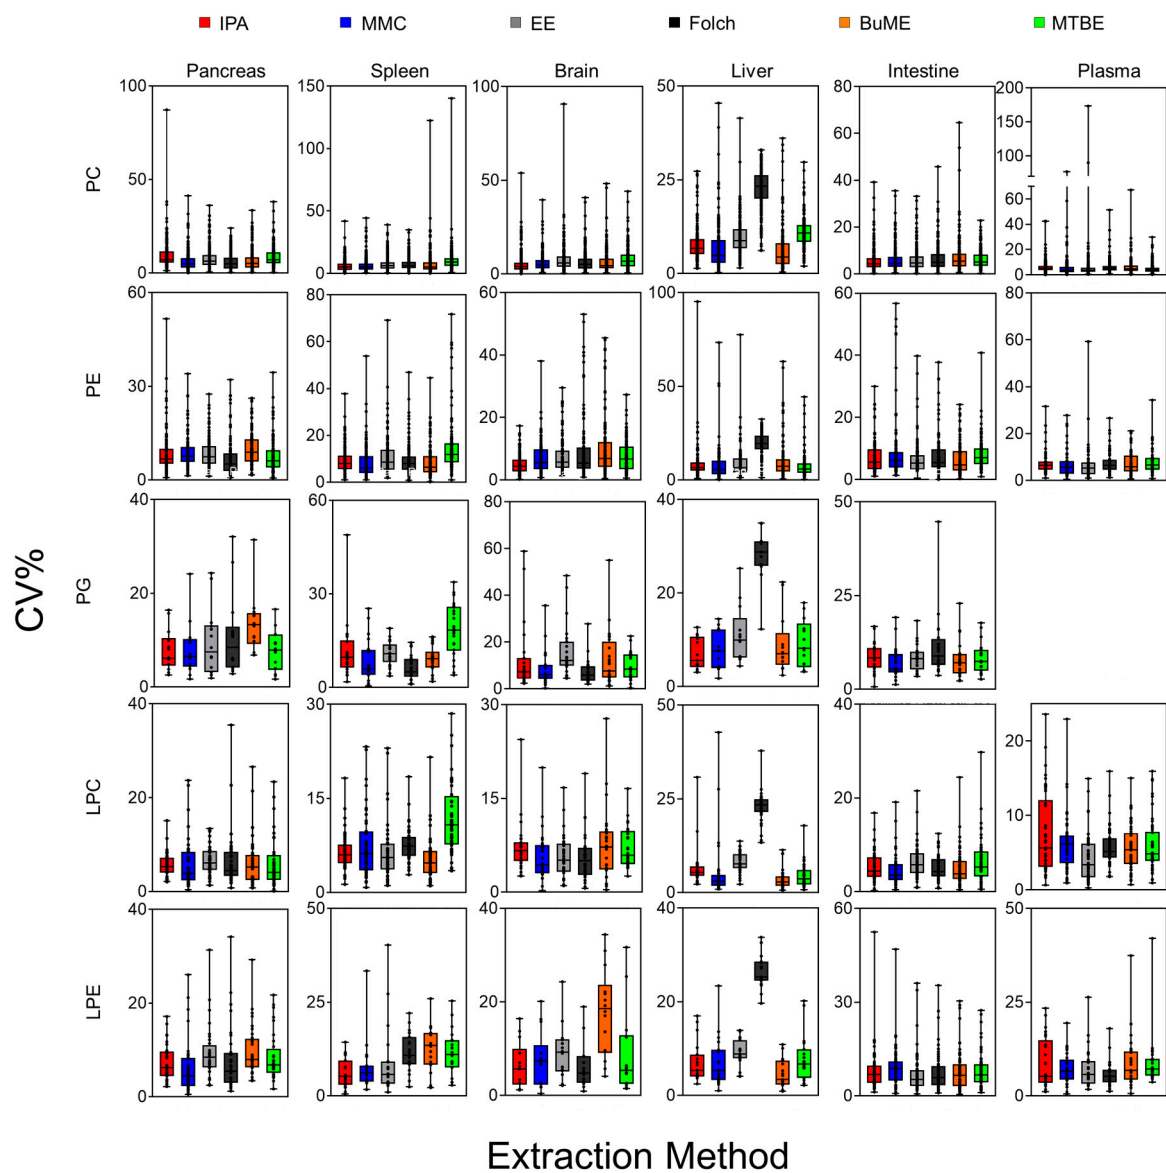

Figure S2. The inter-assay coefficient of variation (CV%) of absolute concentrations of endogenous glycerophospholipids extracted by different methods

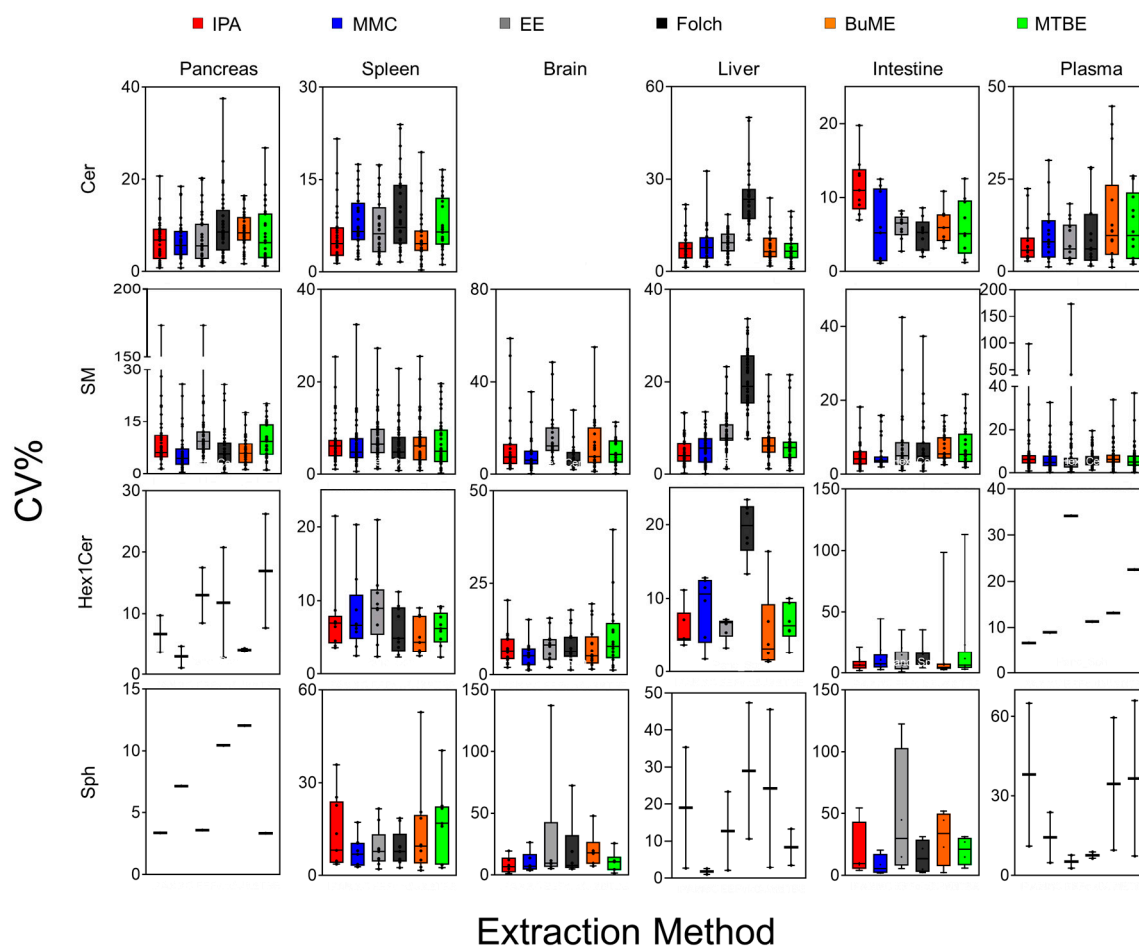

Figure S3. The inter-assay coefficient of variation (CV%) of absolute concentrations of endogenous sphingolipids extracted by different methods

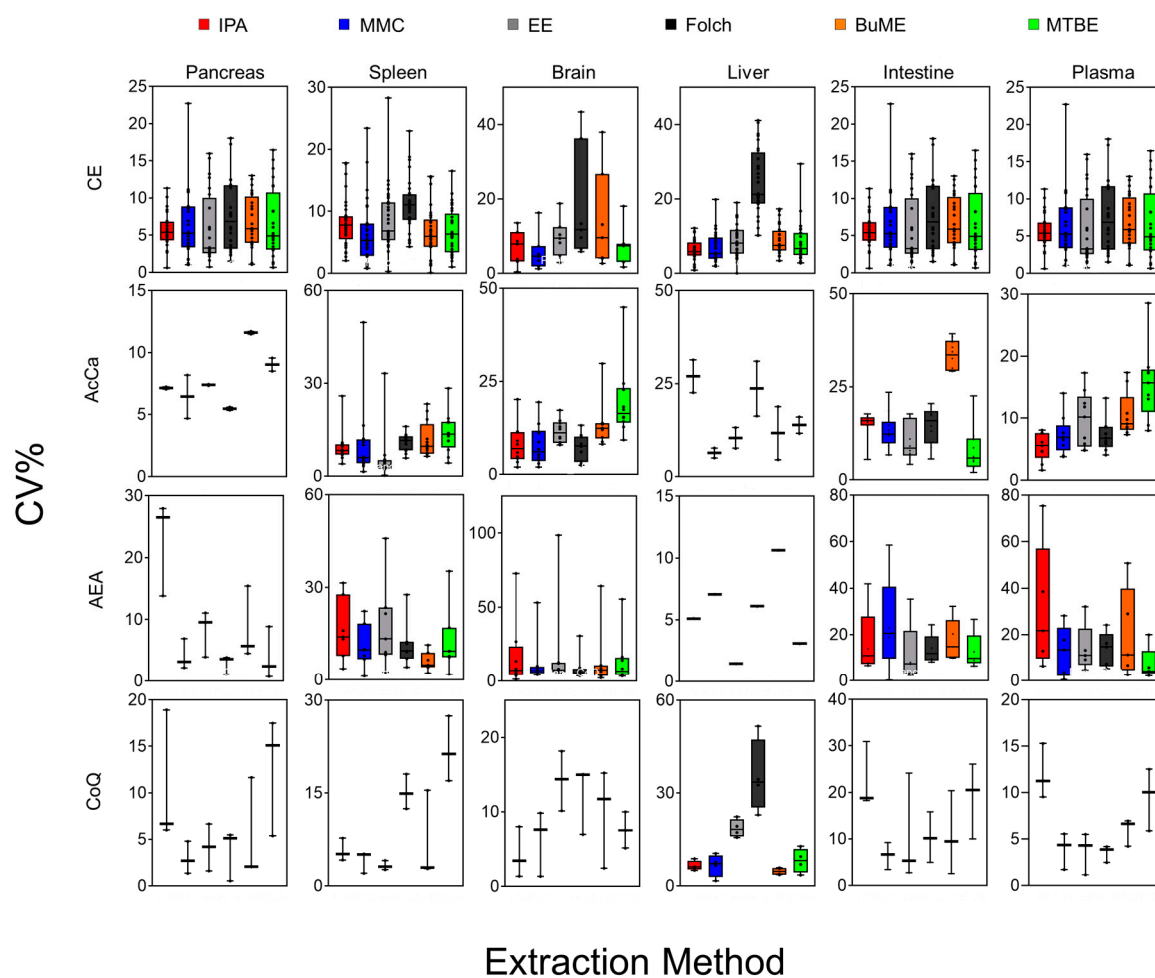

Figure S4. The inter-assay coefficient of variation (CV%) of absolute concentrations of endogenous CE, AcCa, AEA, and CoQ extracted by different methods
