# Supplementary material for: Evaluation of Lipid Extraction Protocols for Untargeted Analysis of Mouse Tissue Lipidome
Source: Metabolites. 2023 Sep 9;13(9):1002. doi: 10.3390/metabo13091002 (PMC10535403; doi:10.3390/metabo13091002)
Supplement: Supplementary file 1 [file metabolites-13-01002-s001.zip › metabolites-2579708-Tables S1-S6.xlsx]

## Sheet: Pancreas
Table S1: Characterization and quantification of mouse pancreatic lipidome using the six tested extraction methods																concentration (uM)
LipidMolec	ClassKey	SubClassKey	LipidSearch ID	Adduct	LipidMolecGroup	FAKey	FAGroupKey	CalcMass	BaseRt	MolFormula	IonCnt	IsoCnt	PDBCnt	TotalSmpIDRate(%)	TotalGrade	IPA_S1	IPA_S2	IPA_S3	MMC_S1	MMC_S2	MMC_S3	EE_S1	EE_S2	EE_S3	Folch_S1	Folch_S2	Folch_S3	BuME_S1	BuME_S2	BuME_S3	MTBE_S1	MTBE_S2	MTBE_S3	QC pooled_p01	QC pooled_p02	QC pooled_p03
AcCa(16:0)	AcCa	Fatty acyl carnitines	962	[M+H]	AcCa(16:0)	(16:0)	(16:0)	399.335	5.449	C23 H45 N1 O4	1	1	0	100	A	0.6943	0.7967	0.72	0.6416	0.754	0.6844	0.8095	0.8871	0.9394	0.6139	0.5521	0.5923	0.8156	0.6965	0.6523	0.4463	0.5177	0.5205	0.8738	0.8033	0.6307
AcCa(18:1)	AcCa	Fatty acyl carnitines	1173	[M+H]	AcCa(18:1)	(18:1)	(18:1)	425.351	5.626	C25 H47 N1 O4	1	1	0	66.7	A	0.1242	0.1385	0.1422	0.129	0.1244	0.1175	0.1492	0.1704	0.1693	0.1064	0.109	0.0978	0.1422	0.1257	0.1131	0.0809	0.098	0.0915	0.1594	0.1438	0.1218
AEA(13:0)	AEA	N-acyl ethanolamines	881	[M+H]	AEA(13:0)	(13:0)	(13:0)	257.235	5.299	C15 H31 N1 O2	1	1	0	100	C	0.0048	0.005	0.0029	0.0135	0.0135	0.0128	0.0103	0.0108	0.0089	0.0701	0.069	0.0687	0.02	0.0192	0.021	0.0331	0.0351	0.0294	0.0229	0.0223	0.0195
AEA(18:1)	AEA	N-acyl ethanolamines	910	[M+H]	AEA(18:1)	(18:1)	(18:1)	325.298	7.086	C20 H39 N1 O2	1	1	0	66.7	B	0.0059	0.0056	0.0072	0.0066	0.0064	0.0066	0.0065	0.0061	0.0065	0.0059	0.0063	0.0061	0.0071	0.008	0.0075	0.0065	0.0067	0.0068	0.0066	0.0085	0.0072
AEA(18:0)	AEA	N-acyl ethanolamines	918	[M+H]	AEA(18:0)	(18:0)	(18:0)	327.314	8.351	C20 H41 N1 O2	1	1	0	100	C	0.0034	0.0049	0.0059	0.0087	0.0079	0.0076	0.0085	0.0071	0.0088	0.0078	0.0084	0.0079	0.0074	0.0083	0.01	0.0117	0.0118	0.0119	0.0099	0.0104	0.0092
Cer(d18:2_16:0)	Cer	acylsphingosines	185	[M+H]	Cer(d34:2)	(d18:2_16:0)	(d34:2)	535.496	15.787	C34 H65 N1 O3	2	2	1	100	A	0.0732	0.0771	0.0714	0.0709	0.0719	0.0829	0.0837	0.0771	0.0841	0.0825	0.0861	0.083	0.0902	0.0973	0.0797	0.0961	0.0918	0.087	0.1056	0.1065	0.1064
Cer(d18:2_16:0)	Cer	acylsphingosines	186	[M+H]	Cer(d34:2)	(d18:2_16:0)	(d34:2)	535.496	16.147	C34 H65 N1 O3	1	2	1	100	A	0.0095	0.0112	0.0113	0.0084	0.0085	0.0085	0.0087	0.0097	0.0107	0.0094	0.0099	0.0091	0.0122	0.0123	0.0115	0.0122	0.0109	0.0105	0.0125	0.012	0.0134
Cer(d18:1_16:0)	Cer	acylsphingosines	181	[M+H]	Cer(d34:1)	(d18:1_16:0)	(d34:1)	537.512	18.064	C34 H67 N1 O3	4	1	1	100	A	0.6263	0.6381	0.6211	0.5971	0.6471	0.6383	0.6621	0.6596	0.6015	0.6716	0.6967	0.7168	0.752	0.7423	0.662	0.6789	0.7089	0.7054	0.8639	0.7647	0.8389
Cer(d18:0_16:0)	Cer	acylsphinganines	603	[M+H]	Cer(d34:0)	(d18:0_16:0)	(d34:0)	539.528	12.784	C34 H69 N1 O3	1	1	1	100	C	0.0165	0.0183	0.0161	0.0144	0.0152	0.015	0.0171	0.0165	0.0172	0.0107	0.0121	0.0127	0.0132	0.0121	0.0104	0.0185	0.0174	0.0175	0.019	0.0171	0.0168
Cer(d18:2_18:0)	Cer	acylsphingosines	612	[M+H]	Cer(d36:2)	(d18:2_18:0)	(d36:2)	563.528	18.625	C36 H69 N1 O3	2	1	1	100	A	0.0511	0.054	0.0465	0.0459	0.0479	0.0496	0.0489	0.0521	0.052	0.0477	0.0478	0.054	0.0555	0.0545	0.0477	0.0535	0.0539	0.0527	0.0633	0.0587	0.0673
Cer(d18:1_18:0)	Cer	acylsphingosines	199	[M+H]	Cer(d36:1)	(d18:1_18:0)	(d36:1)	565.543	20.166	C36 H71 N1 O3	2	2	1	100	A	0.1256	0.1288	0.1306	0.1108	0.0951	0.1159	0.1264	0.1184	0.1389	0.1095	0.1384	0.1187	0.1162	0.135	0.1396	0.1367	0.1311	0.1408	0.1708	0.1448	0.1444
Cer(d18:1_19:0)	Cer	acylsphingosines	215	[M+H]	Cer(d37:1)	(d18:1_19:0)	(d37:1)	579.559	20.644	C37 H73 N1 O3	2	1	1	100	A	0.0158	0.0159	0.0157	0.0136	0.0146	0.016	0.0158	0.0158	0.0175	0.0141	0.0146	0.0142	0.0172	0.0167	0.0163	0.0169	0.0171	0.0164	0.0193	0.0148	0.0184
Cer(d18:2_20:0)	Cer	acylsphingosines	220	[M+H]	Cer(d38:2)	(d18:2_20:0)	(d38:2)	591.559	20.364	C38 H73 N1 O3	2	1	1	100	A	0.105	0.1047	0.0983	0.0909	0.1036	0.1048	0.0776	0.1023	0.1173	0.0889	0.0996	0.1057	0.1056	0.1174	0.104	0.1049	0.1232	0.1032	0.1034	0.1172	0.1167
Cer(d18:2_20:0)	Cer	acylsphingosines	221	[M+H]	Cer(d38:2)	(d18:2_20:0)	(d38:2)	591.559	20.474	C38 H73 N1 O3	2	1	1	100	A	0.0119	0.011	0.0123	0.0116	0.0107	0.0125	0.0112	0.0121	0.009	0.011	0.0114	0.0107	0.0139	0.0152	0.0109	0.0169	0.0132	0.0145	0.0182	0.0143	0.0174
Cer(d18:1_20:0)	Cer	acylsphingosines	239	[M+H]	Cer(d38:1)	(d18:1_20:0)	(d38:1)	593.575	21.004	C38 H75 N1 O3	4	2	1	100	A	0.2476	0.2427	0.2455	0.2162	0.2342	0.2474	0.2773	0.2549	0.2209	0.2319	0.2014	0.2164	0.2524	0.2801	0.2423	0.2686	0.2764	0.2895	0.2773	0.2222	0.305
Cer(d18:2_21:0)	Cer	acylsphingosines	453	[M+H]	Cer(d39:2)	(d18:2_21:0)	(d39:2)	605.575	20.532	C39 H75 N1 O3	2	1	1	100	A	0.345	0.4073	0.3843	0.1588	0.164	0.1691	0.3008	0.3107	0.3493	0.1493	0.1654	0.1436	0.204	0.2105	0.183	0.2	0.1812	0.1769	0.2664	0.229	0.234
Cer(d18:1_21:0)	Cer	acylsphingosines	461	[M+H]	Cer(d39:1)	(d18:1_21:0)	(d39:1)	607.59	21.295	C39 H77 N1 O3	2	1	1	100	A	0.0275	0.028	0.0225	0.0278	0.0281	0.0297	0.0294	0.0301	0.0295	0.0269	0.0247	0.0229	0.0308	0.0297	0.0284	0.0306	0.0314	0.0303	0.0344	0.0342	0.0248
Cer(d18:1_22:1)	Cer	acylsphingosines	485	[M+H]	Cer(d40:2)	(d18:1_22:1)	(d40:2)	619.59	21.003	C40 H77 N1 O3	2	2	0	100	A	0.0153	0.016	0.0128	0.013	0.0175	0.0178	0.0173	0.0153	0.0115	0.0143	0.0107	0.0124	0.0175	0.0231	0.018	0.0163	0.0217	0.0186	0.0222	0.0156	0.0269
Cer(d18:2_22:0)	Cer	acylsphingosines	486	[M+H]	Cer(d40:2)	(d18:2_22:0)	(d40:2)	619.59	21.11	C40 H77 N1 O3	3	2	1	100	A	0.2429	0.2347	0.2226	0.22	0.2382	0.2461	0.2483	0.2373	0.239	0.2268	0.2151	0.2501	0.2419	0.2416	0.2282	0.2372	0.2606	0.1868	0.3097	0.2754	0.2846
Cer(d18:1_22:0)	Cer	acylsphingosines	209	[M+H]	Cer(d40:1)	(d18:1_22:0)	(d40:1)	621.606	21.539	C40 H79 N1 O3	4	2	1	100	A	0.4754	0.4444	0.4539	0.4532	0.4807	0.4523	0.5525	0.5303	0.4772	0.4409	0.4187	0.4582	0.4688	0.5714	0.4612	0.5022	0.5112	0.5171	0.5796	0.6294	0.5728
Cer(d18:2_23:0)	Cer	acylsphingosines	499	[M+H]	Cer(d41:2)	(d18:2_23:0)	(d41:2)	633.606	21.384	C41 H79 N1 O3	2	2	1	100	A	0.0775	0.0771	0.079	0.0702	0.0782	0.0759	0.0813	0.0775	0.0785	0.0787	0.0844	0.0789	0.0862	0.088	0.0852	0.085	0.0862	0.0801	0.1067	0.0936	0.0924
Cer(d18:1_23:0)	Cer	acylsphingosines	510	[M+H]	Cer(d41:1)	(d18:1_23:0)	(d41:1)	635.622	21.736	C41 H81 N1 O3	2	2	1	100	A	0.1801	0.1658	0.1661	0.191	0.1888	0.1351	0.1853	0.1798	0.2043	0.0963	0.0894	0.0732	0.1655	0.1744	0.1335	0.223	0.1279	0.188	0.1963	0.1701	0.1886
Cer(d18:2_24:1)	Cer	acylsphingosines	263	[M+H]	Cer(d42:3)	(d18:2_24:1)	(d42:3)	645.606	21.098	C42 H79 N1 O3	4	2	0	100	A	0.484	0.6349	0.6546	0.5509	0.6611	0.5376	0.5934	0.6511	0.6576	0.5408	0.4674	0.6812	0.5459	0.6266	0.5367	0.6023	0.7116	0.7828	0.7628	0.673	0.625
Cer(d18:1_24:1)	Cer	acylsphingosines	288	[M+H]	Cer(d42:2)	(d18:1_24:1)	(d42:2)	647.622	21.543	C42 H81 N1 O3	3	3	1	100	A	1.1207	1.1033	1.0847	1.1129	1.1952	1.0841	0.9745	1.1967	1.2331	1.2509	1.2307	1.0606	1.4364	1.5591	1.3427	1.3595	1.2804	1.2981	1.6554	1.2318	1.6059
Cer(d18:1_24:0)	Cer	acylsphingosines	411	[M+H]	Cer(d42:1)	(d18:1_24:0)	(d42:1)	649.637	21.922	C42 H83 N1 O3	4	2	1	100	A	1.135	1.111	1.1646	1.0947	1.1947	1.1686	1.1231	1.3583	1.3315	1.2032	1.3919	1.1302	1.3787	1.4174	1.1737	1.23	1.1652	1.2268	1.6447	1.4116	1.3457
Cer(d19:1_24:1)	Cer	acylsphingosines	527	[M+H]	Cer(d43:2)	(d19:1_24:1)	(d43:2)	661.637	21.734	C43 H83 N1 O3	2	2	0	100	A	0.0164	0.0194	0.0177	0.0196	0.0226	0.0236	0.021	0.0215	0.021	0.0145	0.0137	0.0185	0.0258	0.0215	0.0189	0.0208	0.0255	0.0189	0.0292	0.0311	0.022
Cer(d19:1_24:0)	Cer	acylsphingosines	541	[M+H]	Cer(d43:1)	(d19:1_24:0)	(d43:1)	663.653	22.086	C43 H85 N1 O3	2	2	0	100	A	0.046	0.0409	0.0461	0.0447	0.0433	0.0422	0.0472	0.0487	0.048	0.0738	0.0703	0.0612	0.0714	0.0707	0.0618	0.051	0.0488	0.0514	0.0693	0.0645	0.0625
Cer(d20:1_24:1)	Cer	acylsphingosines	557	[M+H]	Cer(d44:2)	(d20:1_24:1)	(d44:2)	675.653	21.892	C44 H85 N1 O3	2	3	0	100	A	0.0211	0.0222	0.0148	0.0203	0.0217	0.0209	0.0263	0.0238	0.0246	0.0316	0.0212	0.0264	0.0309	0.0323	0.0291	0.0249	0.0221	0.023	0.0283	0.0278	0.0324
Cer(d44:1)	Cer	acylsphingosines	584	[M+H]	Cer(d44:1)	(d44:1)	(d44:1)	677.669	22.24	C44 H87 N1 O3	2	4	1	100	A	0.0247	0.0201	0.0208	0.0197	0.0202	0.0196	0.0221	0.0193	0.0268	0.0237	0.0185	0.0146	0.023	0.0272	0.0217	0.0171	0.0217	0.0251	0.0277	0.0254	0.025
Cer(d18:2_34:1)	Cer	acylceramides	734	[M+H]	Cer(d52:3)	(d18:2_34:1)	(d52:3)	799.742	22.242	C52 H97 N1 O4	1	1	0	66.7	C	0.0107	0.0089	0.0098	0.0102	0.0112	0.0104	0.0088	0.0084	0.0106	0.0163	0.0137	0.0137	0.0141	0.0162	0.0136	0.0116	0.0141	0.0137	0.0147	0.0115	0.0142
Cer(d18:2_34:0)	Cer	acylceramides	623	[M+H]	Cer(d52:2)	(d18:2_34:0)	(d52:2)	801.757	22.468	C52 H99 N1 O4	1	1	0	100	C	0.0115	0.0109	0.0118	0.0133	0.0159	0.0143	0.013	0.0131	0.0122	0.0253	0.0306	0.0264	0.027	0.0271	0.0231	0.0177	0.0212	0.0168	0.0274	0.0255	0.0277
Cer(d18:2_38:0)	Cer	acylceramides	678	[M+H]	Cer(d56:2)	(d18:2_38:0)	(d56:2)	857.82	23.004	C56 H107 N1 O4	1	1	0	66.7	C	0.0065	0.0056	0.0063	0.0071	0.0069	0.0067	0.006	0.0067	0.0065	0.0118	0.0086	0.0111	0.0123	0.0127	0.0112	0.0088	0.008	0.0108	0.0126	0.0112	0.0099
Cer(d18:3_40:0)	Cer	acylceramides	690	[M+H]	Cer(d58:3)	(d18:3_40:0)	(d58:3)	883.836	22.995	C58 H109 N1 O4	1	2	0	100	C	0.014	0.012	0.0134	0.0178	0.0193	0.0168	0.015	0.0156	0.0142	0.0271	0.0235	0.0292	0.0264	0.0335	0.027	0.0234	0.0226	0.0229	0.0318	0.0282	0.0263
Cer(d18:3_42:2)	Cer	acylceramides	695	[M+H]	Cer(d60:5)	(d18:3_42:2)	(d60:5)	907.836	22.779	C60 H109 N1 O4	1	1	0	100	C	0.0076	0.0076	0.0078	0.0083	0.0088	0.009	0.0079	0.0078	0.008	0.0128	0.0126	0.0123	0.0128	0.0123	0.0112	0.0111	0.0102	0.0098	0.0131	0.0115	0.0128
Cer(d18:2_42:2)	Cer	acylceramides	700	[M+H]	Cer(d60:4)	(d18:2_42:2)	(d60:4)	909.851	23.007	C60 H111 N1 O4	1	1	0	100	C	0.0215	0.0182	0.0219	0.0258	0.0266	0.029	0.0226	0.0223	0.0232	0.0338	0.0326	0.0367	0.0356	0.0443	0.0406	0.0345	0.0326	0.0297	0.0389	0.0374	0.0393
Cer(d18:2_42:1)	Cer	acylceramides	702	[M+H]	Cer(d60:3)	(d18:2_42:1)	(d60:3)	911.867	23.323	C60 H113 N1 O4	1	1	0	100	C	0.0231	0.0194	0.0209	0.0247	0.0236	0.0268	0.0243	0.0216	0.0244	0.0322	0.0336	0.0344	0.0367	0.0383	0.0339	0.0341	0.0335	0.0303	0.0397	0.0375	0.0388
Cer(d18:2_42:0)	Cer	acylceramides	714	[M+H]	Cer(d60:2)	(d18:2_42:0)	(d60:2)	913.883	23.531	C60 H115 N1 O4	1	1	0	100	C	0.0107	0.0086	0.0096	0.0106	0.0148	0.0129	0.0119	0.0126	0.0126	0.0166	0.0093	0.0089	0.0117	0.0144	0.015	0.0149	0.0158	0.0152	0.0164	0.0158	0.0154
ChE(12:0)	ChE	sterolEsters	1306	[M+NH4]	ChE(12:0)	(12:0)	(12:0)	568.522	23.426	C39 H68 O2	1	1	0	100	A	0.008	0.009	0.009	0.012	0.011	0.013	0.011	0.01	0.009	0.019	0.014	0.021	0.023	0.023	0.026	0.012	0.011	0.013	0.02	0.029	0.021
ChE(14:1)	ChE	sterolEsters	1314	[M+NH4]	ChE(14:1)	(14:1)	(14:1)	594.538	23.415	C41 H70 O2	1	1	0	100	A	0.011	0.012	0.012	0.014	0.016	0.013	0.012	0.012	0.013	0.022	0.022	0.025	0.029	0.029	0.032	0.016	0.017	0.018	0.025	0.029	0.026
ChE(14:0)	ChE	sterolEsters	1317	[M+NH4]	ChE(14:0)	(14:0)	(14:0)	596.553	23.809	C41 H72 O2	1	1	0	100	A	0.058	0.061	0.049	0.058	0.058	0.062	0.058	0.057	0.06	0.054	0.053	0.057	0.075	0.088	0.078	0.076	0.073	0.083	0.075	0.079	0.068
ChE(16:2)	ChE	sterolEsters	1325	[M+NH4]	ChE(16:2)	(16:2)	(16:2)	620.553	23.458	C43 H72 O2	1	1	0	100	A	0.018	0.015	0.019	0.02	0.018	0.021	0.019	0.019	0.018	0.028	0.025	0.032	0.039	0.037	0.038	0.019	0.025	0.022	0.025	0.029	0.039
ChE(16:1)	ChE	sterolEsters	1330	[M+NH4]	ChE(16:1)	(16:1)	(16:1)	622.569	23.777	C43 H74 O2	1	1	0	66.7	A	0.598	0.559	0.544	0.596	0.646	0.643	0.589	0.589	0.623	0.908	0.821	0.763	0.948	0.918	0.981	0.831	0.786	0.838	0.911	0.922	0.901
ChE(16:0)	ChE	sterolEsters	1334	[M+NH4]	ChE(16:0)	(16:0)	(16:0)	624.585	24.205	C43 H76 O2	1	1	0	100	A	0.522	0.503	0.559	0.454	0.476	0.484	0.494	0.492	0.616	0.466	0.444	0.494	0.622	0.514	0.618	0.633	0.609	0.648	0.547	0.662	0.683
ChE(17:1)	ChE	sterolEsters	1348	[M+NH4]	ChE(17:1)	(17:1)	(17:1)	636.585	23.966	C44 H76 O2	1	1	0	100	A	0.043	0.042	0.036	0.042	0.05	0.047	0.039	0.041	0.042	0.063	0.057	0.067	0.073	0.081	0.085	0.059	0.064	0.06	0.08	0.074	0.074
ChE(17:0)	ChE	sterolEsters	1351	[M+NH4]	ChE(17:0)	(17:0)	(17:0)	638.6	24.311	C44 H78 O2	1	1	0	100	A	0.021	0.019	0.019	0.029	0.033	0.026	0.025	0.023	0.023	0.033	0.03	0.033	0.047	0.044	0.048	0.036	0.036	0.035	0.038	0.043	0.042
ChE(18:3)	ChE	sterolEsters	1354	[M+NH4]	ChE(18:3)	(18:3)	(18:3)	646.569	23.503	C45 H74 O2	1	1	0	100	A	0.39	0.367	0.415	0.292	0.365	0.323	0.398	0.365	0.317	0.455	0.396	0.458	0.462	0.555	0.593	0.384	0.452	0.413	0.545	0.527	0.418
ChE(18:2)	ChE	sterolEsters	1357	[M+NH4]	ChE(18:2)	(18:2)	(18:2)	648.585	23.808	C45 H76 O2	1	1	0	100	A	3.916	3.851	3.601	3.732	3.826	3.778	3.848	3.748	3.838	3.741	3.542	4.471	6.01	5.419	5.727	4.605	5.026	4.785	5.632	5.485	5.119
ChE(18:1)	ChE	sterolEsters	1358	[M+NH4]	ChE(18:1)	(18:1)	(18:1)	650.6	23.984	C45 H78 O2	1	1	0	66.7	A	0.043	0.04	0.038	0.047	0.057	0.048	0.039	0.053	0.048	0.064	0.059	0.045	0.077	0.083	0.077	0.07	0.088	0.069	0.082	0.073	0.075
ChE(18:1)	ChE	sterolEsters	1359	[M+NH4]	ChE(18:1)	(18:1)	(18:1)	650.6	24.163	C45 H78 O2	1	1	0	100	A	1.097	1.103	1.111	0.947	0.949	0.891	1.047	1.002	1.099	0.831	0.794	0.891	1.156	1.185	1.175	1.089	1.193	1.186	1.198	1.148	1.268
ChE(18:0)	ChE	sterolEsters	1364	[M+NH4]	ChE(18:0)	(18:0)	(18:0)	652.616	24.59	C45 H80 O2	1	1	0	100	A	0.123	0.134	0.133	0.169	0.189	0.181	0.15	0.132	0.156	0.196	0.2	0.191	0.263	0.266	0.317	0.196	0.233	0.273	0.226	0.258	0.24
ChE(19:3)	ChE	sterolEsters	1423	[M+NH4]	ChE(19:3)	(19:3)	(19:3)	660.585	23.612	C46 H76 O2	1	1	0	66.7	A	0.028	0.031	0.031	0.027	0.028	0.031	0.029	0.028	0.03	0.044	0.044	0.043	0.056	0.061	0.059	0.037	0.04	0.039	0.052	0.046	0.046
ChE(19:1)	ChE	sterolEsters	1432	[M+NH4]	ChE(19:1)	(19:1)	(19:1)	664.616	24.287	C46 H80 O2	1	1	0	100	A	0.051	0.045	0.047	0.064	0.065	0.063	0.056	0.054	0.056	0.076	0.072	0.076	0.1	0.097	0.105	0.083	0.086	0.083	0.091	0.097	0.101
ChE(20:5)	ChE	sterolEsters	1446	[M+NH4]	ChE(20:5)	(20:5)	(20:5)	670.569	23.342	C47 H74 O2	1	1	0	100	A	0.067	0.057	0.059	0.065	0.065	0.061	0.065	0.064	0.062	0.088	0.082	0.088	0.112	0.105	0.13	0.086	0.087	0.088	0.102	0.102	0.096
ChE(20:4)	ChE	sterolEsters	1459	[M+NH4]	ChE(20:4)	(20:4)	(20:4)	672.585	23.623	C47 H76 O2	1	1	0	100	A	0.39	0.413	0.399	0.422	0.422	0.409	0.385	0.377	0.397	0.631	0.596	0.604	0.688	0.698	0.683	0.515	0.507	0.587	0.656	0.612	0.63
ChE(20:3)	ChE	sterolEsters	1461	[M+NH4]	ChE(20:3)	(20:3)	(20:3)	674.6	23.853	C47 H78 O2	1	1	0	100	A	0.081	0.083	0.075	0.084	0.086	0.085	0.086	0.083	0.081	0.12	0.121	0.128	0.125	0.151	0.138	0.111	0.109	0.109	0.138	0.131	0.131
ChE(20:2)	ChE	sterolEsters	1478	[M+NH4]	ChE(20:2)	(20:2)	(20:2)	676.616	24.038	C47 H80 O2	1	1	0	66.7	A	0.015	0.014	0.014	0.01	0.015	0.012	0.023	0.031	0.028	0.018	0.021	0.019	0.027	0.029	0.03	0.019	0.015	0.014	0.028	0.033	0.031
ChE(20:1)	ChE	sterolEsters	1485	[M+NH4]	ChE(20:1)	(20:1)	(20:1)	678.631	24.516	C47 H82 O2	1	1	0	100	A	0.063	0.053	0.059	0.071	0.078	0.072	0.059	0.062	0.061	0.08	0.081	0.077	0.111	0.089	0.114	0.085	0.083	0.102	0.095	0.101	0.091
ChE(22:6)	ChE	sterolEsters	1503	[M+NH4]	ChE(22:6)	(22:6)	(22:6)	696.585	23.447	C49 H76 O2	1	1	0	100	A	0.34	0.322	0.334	0.388	0.408	0.378	0.393	0.35	0.37	0.599	0.417	0.552	0.69	0.612	0.682	0.412	0.435	0.434	0.559	0.554	0.639
ChE(22:5)	ChE	sterolEsters	1512	[M+NH4]	ChE(22:5)	(22:5)	(22:5)	698.6	23.616	C49 H78 O2	1	1	0	100	A	0.065	0.067	0.07	0.072	0.067	0.066	0.062	0.063	0.063	0.088	0.088	0.09	0.121	0.113	0.119	0.084	0.09	0.095	0.11	0.095	0.103
ChE(22:4)	ChE	sterolEsters	1513	[M+NH4]	ChE(22:4)	(22:4)	(22:4)	700.616	23.891	C49 H80 O2	1	1	0	100	A	0.037	0.035	0.039	0.039	0.047	0.043	0.037	0.039	0.039	0.054	0.044	0.055	0.077	0.068	0.072	0.053	0.055	0.05	0.06	0.059	0.057
ChE(24:6)	ChE	sterolEsters	1524	[M+NH4]	ChE(24:6)	(24:6)	(24:6)	724.616	23.673	C51 H80 O2	1	1	0	100	A	0.015	0.013	0.015	0.014	0.017	0.014	0.017	0.014	0.014	0.021	0.017	0.021	0.025	0.023	0.029	0.02	0.019	0.02	0.025	0.024	0.024
Co(Q8)	Co	Coenzyme Q	1533	[M+NH4]	Co(Q8)	(Q8)	(Q8)	726.559	21.687	C49 H74 O4	1	1	0	100	A	0.0544	0.08	0.0681	0.0737	0.076	0.072	0.0775	0.0751	0.0765	0.0634	0.0569	0.06	0.0668	0.0642	0.0649	0.0628	0.0781	0.0557	0.0772	0.0792	0.0856
Co(Q9)	Co	Coenzyme Q	1539	[M+NH4]	Co(Q9)	(Q9)	(Q9)	794.621	22.231	C54 H82 O4	2	1	0	100	A	1.9486	2.1096	1.8489	1.9555	2.0462	1.8596	2.0538	1.8724	2.1347	1.5767	1.7329	1.7145	1.7543	1.4611	1.833	1.5975	2.1216	2.081	1.8203	1.808	2.2688
Co(Q10)	Co	Coenzyme Q	1543	[M+NH4]	Co(Q10)	(Q10)	(Q10)	862.684	22.682	C59 H90 O4	1	1	0	66.7	A	0.1791	0.1992	0.1807	0.1948	0.1985	0.1999	0.1933	0.1958	0.2088	0.1966	0.1961	0.1981	0.1997	0.2064	0.1988	0.1865	0.2031	0.2064	0.2164	0.2212	0.2338
DG(6:0_16:0)	DG	diacyl	2653	[M+NH4]	DG(22:0)	(6:0_16:0)	(22:0)	428.35	10.786	C25 H48 O5	1	1	0	66.7	A	0.0004	0.0014	0.0006	0.0025	0.0033	0.0029	0.0007	0.0008	0.0006	0.0092	0.0104	0.0114	0.0142	0.0184	0.0174	0.0026	0.0023	0.0025	0.005	0.0059	0.0047
DG(6:0_18:2)	DG	diacyl	1733	[M+NH4]	DG(24:2)	(6:0_18:2)	(24:2)	452.35	9.654	C27 H48 O5	1	1	0	100	A	0.0016	0.0021	0.0011	0.0018	0.0021	0.0021	0.0011	0.0013	0.0014	0.0019	0.0022	0.0024	0.0083	0.0081	0.0084	0.0017	0.0015	0.0017	0.0034	0.0035	0.003
DG(8:0_16:0)	DG	diacyl	1735	[M+NH4]	DG(24:0)	(8:0_16:0)	(24:0)	456.381	12.696	C27 H52 O5	1	1	0	100	A	0.0001	0.0001	0.0002	0.0032	0.0037	0.0028	0.0003	0.0004	0.0003	0.0179	0.0189	0.0187	0.0129	0.0138	0.0122	0.0025	0.0019	0.0017	0.0056	0.0062	0.0049
DG(10:0_18:2)	DG	diacyl	1762	[M+NH4]	DG(28:2)	(10:0_18:2)	(28:2)	508.413	13.316	C31 H56 O5	2	1	0	100	A	0.0045	0.007	0.0052	0.0085	0.0091	0.009	0.0046	0.0046	0.0041	0.0098	0.0091	0.0092	0.0055	0.0066	0.0062	0.0059	0.005	0.006	0.0083	0.0075	0.0069
DG(12:0_16:1)	DG	diacyl	1767	[M+NH4]	DG(28:1)	(12:0_16:1)	(28:1)	510.428	15.183	C31 H58 O5	1	1	1	100	A	0.0029	0.0057	0.0033	0.0055	0.0091	0.0072	0.004	0.0046	0.0041	0.0084	0.0083	0.0082	0.0071	0.0077	0.0061	0.0054	0.0031	0.0041	0.008	0.0084	0.0052
DG(12:0_18:2)	DG	diacyl	1782	[M+NH4]	DG(30:2)	(12:0_18:2)	(30:2)	536.444	15.779	C33 H60 O5	1	1	1	100	A	0.0268	0.0324	0.0276	0.0854	0.0844	0.0936	0.0419	0.0444	0.037	0.0967	0.0941	0.1097	0.0509	0.0624	0.0501	0.0611	0.051	0.0562	0.0584	0.0658	0.0567
DG(O-15:1_16:1)	DG	alkyl-acyl	1789	[M+NH4]	DG(O-31:2)	(O-15:1_16:1)	(O-31:2)	536.48	19.647	C34 H64 O4	1	2	0	66.7	B	0.0042	0.0033	0.0035	0.0087	0.0081	0.0091	0.005	0.0051	0.0041	0.0088	0.0074	0.0088	0.0069	0.0078	0.0079	0.0084	0.0085	0.0076	0.0067	0.0071	0.0055
DG(12:0_18:1)	DG	diacyl	1794	[M+NH4]	DG(30:1)	(12:0_18:1)	(30:1)	538.46	17.876	C33 H62 O5	1	3	1	66.7	A	0.0364	0.0421	0.0379	0.1225	0.1258	0.139	0.0573	0.05	0.0486	0.1186	0.1121	0.148	0.071	0.0779	0.0815	0.0876	0.0795	0.0833	0.0735	0.0763	0.0722
DG(O-13:0_18:1)	DG	alkyl-acyl	1800	[M+NH4]	DG(O-31:1)	(O-13:0_18:1)	(O-31:1)	538.496	20.692	C34 H66 O4	1	1	0	100	B	0.0027	0.0024	0.0022	0.0059	0.0056	0.0053	0.0029	0.0031	0.0027	0.0055	0.0057	0.0059	0.0061	0.0061	0.0067	0.0059	0.0062	0.0057	0.0052	0.0066	0.0041
DG(14:0_16:0)	DG	diacyl	1805	[M+NH4]	DG(30:0)	(14:0_16:0)	(30:0)	540.475	19.933	C33 H64 O5	2	1	1	100	A	0.1325	0.1183	0.1151	0.3285	0.3283	0.3333	0.1551	0.1523	0.1478	0.4128	0.3981	0.4458	0.2522	0.283	0.2431	0.2457	0.1891	0.234	0.2406	0.2363	0.1976
DG(15:0_16:0)	DG	diacyl	1843	[M+NH4]	DG(31:0)	(15:0_16:0)	(31:0)	554.491	20.476	C34 H66 O5	1	1	1	100	A	0.0087	0.0101	0.0088	0.0269	0.0216	0.021	0.0104	0.0098	0.0095	0.0357	0.0315	0.0318	0.0362	0.0339	0.0381	0.0179	0.0145	0.0166	0.0204	0.0219	0.0199
DG(14:1_18:2)	DG	diacyl	1855	[M+NH4]	DG(32:3)	(14:1_18:2)	(32:3)	562.46	16.238	C35 H62 O5	1	2	1	100	A	0.0115	0.0149	0.0136	0.0399	0.0443	0.0436	0.0197	0.0179	0.0172	0.0492	0.0489	0.0501	0.0239	0.0307	0.025	0.0277	0.0239	0.0279	0.0267	0.0303	0.0261
DG(O-15:2_18:1)	DG	alkyl-acyl	1865	[M+NH4]	DG(O-33:3)	(O-15:2_18:1)	(O-33:3)	562.496	19.937	C36 H66 O4	1	2	0	100	B	0.0066	0.0059	0.0056	0.0138	0.0145	0.0167	0.0065	0.0081	0.0069	0.0145	0.0136	0.0159	0.0126	0.0136	0.0085	0.0125	0.0154	0.0164	0.0115	0.012	0.0109
DG(14:0_18:2)	DG	diacyl	1871	[M+NH4]	DG(32:2)	(14:0_18:2)	(32:2)	564.475	18.53	C35 H64 O5	2	1	1	100	A	0.3203	0.2889	0.2826	1.1311	1.1611	1.0644	0.5219	0.5471	0.4357	1.353	1.1674	1.4696	0.7191	0.7842	0.7825	0.8252	0.6937	0.7682	0.8111	0.7738	0.7248
DG(14:0_18:1)	DG	diacyl	1833	[M+NH4]	DG(32:1)	(14:0_18:1)	(32:1)	566.491	19.929	C35 H66 O5	1	2	1	66.7	A	0.487	0.4923	0.4659	1.515	1.6002	1.63	0.6922	0.736	0.6072	1.7536	1.6739	1.787	1.0472	1.115	0.9814	1.1763	0.9193	1.1044	1.0953	1.1626	0.9474
DG(15:0_18:2)	DG	diacyl	2156	[M+NH4]	DG(33:2)	(15:0_18:2)	(33:2)	578.491	19.71	C36 H66 O5	1	2	1	100	A	0.0115	0.0146	0.0114	0.0421	0.0385	0.0424	0.0204	0.0195	0.0164	0.0465	0.0392	0.045	0.0324	0.0302	0.0301	0.0332	0.0262	0.0305	0.028	0.026	0.0239
DG(15:0_18:1)	DG	diacyl	2167	[M+NH4]	DG(33:1)	(15:0_18:1)	(33:1)	580.507	20.569	C36 H68 O5	2	1	1	100	A	0.0241	0.0238	0.023	0.0762	0.0767	0.0814	0.0308	0.0334	0.0297	0.086	0.0793	0.0796	0.0633	0.0641	0.0637	0.0565	0.0476	0.0495	0.0535	0.0551	0.0466
DG(16:0_17:0)	DG	diacyl	2185	[M+NH4]	DG(33:0)	(16:0_17:0)	(33:0)	582.522	21.191	C36 H70 O5	1	1	1	100	A	0.0175	0.0207	0.0184	0.0523	0.0499	0.051	0.0232	0.0233	0.022	0.0777	0.072	0.0793	0.0587	0.0514	0.061	0.0365	0.0308	0.0358	0.0453	0.0476	0.0409
DG(16:1_18:3)	DG	diacyl	2194	[M+NH4]	DG(34:4)	(16:1_18:3)	(34:4)	588.475	17.038	C37 H64 O5	1	2	2	100	A	0.0195	0.024	0.0227	0.0755	0.084	0.0846	0.0356	0.0355	0.0293	0.0937	0.0898	0.0945	0.046	0.0497	0.0496	0.0505	0.0446	0.0481	0.0491	0.0541	0.0429
DG(14:0_20:4)	DG	diacyl	2195	[M+NH4]	DG(34:4)	(14:0_20:4)	(34:4)	588.475	18.072	C37 H64 O5	1	2	1	100	A	0.0022	0.0018	0.0031	0.0069	0.0053	0.0064	0.0034	0.0022	0.0029	0.009	0.0087	0.0095	0.004	0.0057	0.0041	0.0023	0.0046	0.0072	0.0058	0.0058	0.005
DG(16:1_18:2)	DG	diacyl	2031	[M+NH4]	DG(34:3)	(16:1_18:2)	(34:3)	590.491	18.929	C37 H66 O5	3	2	1	100	A	0.8525	0.9248	0.8394	2.8393	2.8348	2.8292	1.3139	1.3972	1.1093	3.3678	3.1742	3.794	1.8407	2.0158	2.0496	2.0543	1.9087	1.93	2.1304	2.0491	1.8207
DG(16:1_18:2)	DG	diacyl	2035	[M+NH4]	DG(34:3)	(16:1_18:2)	(34:3)	590.491	19.134	C37 H66 O5	1	2	1	100	A	0.0307	0.0305	0.0356	0.1235	0.116	0.1475	0.0421	0.0543	0.0439	0.1043	0.0639	0.0901	0.0493	0.0413	0.0627	0.0435	0.0351	0.0595	0.0862	0.0929	0.0703
DG(16:0_18:3)	DG	diacyl	2036	[M+NH4]	DG(34:3)	(16:0_18:3)	(34:3)	590.491	19.455	C37 H66 O5	1	2	2	100	A	0.0499	0.0444	0.0438	0.1735	0.1692	0.2159	0.0887	0.085	0.0792	0.2159	0.2268	0.2434	0.1204	0.1447	0.1329	0.1435	0.1231	0.1292	0.1455	0.1344	0.1306
DG(16:0_18:2)	DG	diacyl	2096	[M+NH4]	DG(34:2)	(16:0_18:2)	(34:2)	592.507	20.174	C37 H68 O5	1	3	1	66.7	A	0.5666	0.6382	0.5941	1.8292	1.7589	1.8879	0.9106	0.8136	0.7957	2.2325	2.1039	2.2487	1.3143	1.4582	1.3662	1.4613	1.1836	1.3272	1.2825	1.4036	1.2016
DG(16:0_18:2)	DG	diacyl	2097	[M+NH4]	DG(34:2)	(16:0_18:2)	(34:2)	592.507	20.307	C37 H68 O5	3	3	1	100	A	2.1802	1.9715	1.8374	5.8709	7.5934	6.4988	3.2836	3.1745	2.8533	6.7323	6.3595	8.0877	3.87	4.8045	4.0116	4.8742	4.4322	5.1787	4.7967	4.2198	3.7352
DG(16:0_18:1)	DG	diacyl	2147	[M+NH4]	DG(34:1)	(16:0_18:1)	(34:1)	594.522	20.933	C37 H70 O5	3	1	4	100	A	1.8754	1.8778	1.6951	5.5824	6.1331	5.9045	2.314	2.4931	2.0405	5.5805	5.698	6.0327	4.4209	3.8978	3.84	3.9709	3.8148	4.0494	3.8725	4.0418	3.5939
DG(16:0_18:0)	DG	diacyl	2163	[M+NH4]	DG(34:0)	(16:0_18:0)	(34:0)	596.538	21.469	C37 H72 O5	3	1	2	100	A	0.4355	0.397	0.4674	1.0642	1.028	1.0018	0.439	0.4162	0.3893	4.2199	4.2711	4.9797	1.8073	1.9224	1.7157	0.8722	0.6945	0.8097	1.4838	1.5749	1.2659
DG(17:1_18:2)	DG	diacyl	2249	[M+NH4]	DG(35:3)	(17:1_18:2)	(35:3)	604.507	19.88	C38 H68 O5	1	2	1	100	A	0.0213	0.0223	0.0218	0.0679	0.0707	0.078	0.0332	0.0323	0.0272	0.0841	0.0799	0.0846	0.0511	0.0502	0.05	0.0531	0.0433	0.0451	0.0481	0.0534	0.0466
DG(17:0_18:2)	DG	diacyl	2252	[M+NH4]	DG(35:2)	(17:0_18:2)	(35:2)	606.522	20.753	C38 H70 O5	1	2	1	100	A	0.012	0.0106	0.0103	0.0395	0.0478	0.0457	0.0216	0.0224	0.0221	0.0606	0.0521	0.0652	0.033	0.0377	0.0347	0.036	0.029	0.0305	0.0342	0.0332	0.0298
DG(17:0_18:1)	DG	diacyl	2259	[M+NH4]	DG(35:1)	(17:0_18:1)	(35:1)	608.538	21.235	C38 H72 O5	2	1	1	100	A	0.0296	0.0249	0.0284	0.0952	0.0995	0.1005	0.0416	0.0442	0.0376	0.116	0.106	0.1217	0.0763	0.0838	0.0781	0.0762	0.0692	0.071	0.0695	0.0761	0.0638
DG(16:0_19:0)	DG	diacyl	2262	[M+NH4]	DG(35:0)	(16:0_19:0)	(35:0)	610.554	21.683	C38 H74 O5	1	2	1	100	A	0.0054	0.0063	0.005	0.0143	0.0152	0.0139	0.0064	0.0063	0.0053	0.0293	0.0265	0.0319	0.0237	0.0186	0.0203	0.0118	0.0107	0.0141	0.0178	0.0149	0.0142
DG(18:3_18:3)	DG	diacyl	2269	[M+NH4]	DG(36:6)	(18:3_18:3)	(36:6)	612.475	15.838	C39 H64 O5	1	4	3	100	A	0.0032	0.0039	0.0034	0.0117	0.0108	0.0123	0.0056	0.0063	0.0047	0.0141	0.0149	0.0149	0.0081	0.0073	0.0058	0.005	0.0062	0.0068	0.0081	0.0088	0.0073
DG(14:0_22:6)	DG	diacyl	2273	[M+NH4]	DG(36:6)	(14:0_22:6)	(36:6)	612.475	17.391	C39 H64 O5	1	4	1	100	A	0.0013	0.002	0.0019	0.0053	0.0046	0.0043	0.0021	0.0025	0.0018	0.0072	0.0066	0.0079	0.0019	0.0045	0.0032	0.0032	0.0041	0.0026	0.004	0.0046	0.0034
DG(18:2_18:3)	DG	diacyl	2279	[M+NH4]	DG(36:5)	(18:2_18:3)	(36:5)	614.491	17.65	C39 H66 O5	2	3	3	100	A	0.1145	0.1393	0.1315	0.4011	0.4494	0.4396	0.2004	0.1973	0.1634	0.514	0.4618	0.5473	0.2591	0.2865	0.277	0.3072	0.2464	0.2732	0.2633	0.2852	0.2415
DG(18:2_18:3)	DG	diacyl	2280	[M+NH4]	DG(36:5)	(18:2_18:3)	(36:5)	614.491	17.906	C39 H66 O5	1	3	3	100	A	0.0088	0.0126	0.0113	0.0417	0.0441	0.0464	0.0172	0.0172	0.0126	0.0232	0.0226	0.0341	0.0191	0.0203	0.0225	0.0264	0.0188	0.0256	0.0186	0.0252	0.0162
DG(16:1_20:4)	DG	diacyl	2281	[M+NH4]	DG(36:5)	(16:1_20:4)	(36:5)	614.491	18.425	C39 H66 O5	1	3	1	100	A	0.0397	0.0456	0.0431	0.113	0.1207	0.1082	0.0572	0.0616	0.0466	0.0968	0.0817	0.1305	0.0604	0.0825	0.0723	0.0869	0.0839	0.0845	0.0788	0.0866	0.0698
DG(16:0_20:5)	DG	diacyl	2282	[M+NH4]	DG(36:5)	(16:0_20:5)	(36:5)	614.491	18.984	C39 H66 O5	1	3	1	100	A	0.0037	0.0027	0.0036	0.0113	0.0084	0.0105	0.0053	0.0037	0.0034	0.0062	0.0087	0.0104	0.0069	0.0071	0.0085	0.008	0.0063	0.008	0.0083	0.0079	0.0072
DG(18:1_18:2)	DG	diacyl	2304	[M+NH4]	DG(36:3)	(18:1_18:2)	(36:3)	618.522	20.409	C39 H70 O5	2	2	1	100	A	3.5324	3.7944	3.1598	10.3609	10.6564	11.2374	4.7652	5.0586	4.257	11.897	11.1127	12.9279	6.8727	8.2406	7.9383	8.2935	7.2628	7.5273	7.6168	7.6271	6.4831
DG(18:0_18:2)	DG	diacyl	2319	[M+NH4]	DG(36:2)	(18:0_18:2)	(36:2)	620.538	20.988	C39 H72 O5	1	2	1	66.7	A	2.0576	2.1989	2.1985	6.6637	7.0499	6.7238	3.1517	3.101	2.2842	7.3984	6.1816	8.4313	4.5077	5.1242	4.8141	4.778	4.6276	5.076	4.866	4.4532	4.2526
DG(18:0_18:1)	DG	diacyl	2335	[M+NH4]	DG(36:1)	(18:0_18:1)	(36:1)	622.554	21.493	C39 H74 O5	1	1	1	100	A	0.4019	0.411	0.4089	1.2633	1.2228	1.2658	0.5786	0.5708	0.4992	1.6627	1.362	1.6384	0.9465	1.0594	0.9958	0.9759	0.819	0.8782	0.8982	1.0379	0.8478
DG(O-16:0_22:6)	DG	alkyl-acyl	2364	[M+NH4]	DG(O-38:6)	(O-16:0_22:6)	(O-38:6)	626.527	20.752	C41 H70 O4	1	1	0	100	B	0.0075	0.0069	0.0063	0.012	0.0139	0.0108	0.0077	0.0074	0.0074	0.0185	0.0169	0.0198	0.0126	0.0128	0.0119	0.0132	0.0138	0.0124	0.0107	0.0117	0.0088
DG(19:1_18:2)	DG	diacyl	2374	[M+NH4]	DG(37:3)	(19:1_18:2)	(37:3)	632.538	20.802	C40 H72 O5	1	1	1	100	A	0.0129	0.016	0.0134	0.047	0.0428	0.0531	0.0209	0.0217	0.0175	0.0578	0.0584	0.0636	0.0375	0.0389	0.0363	0.0354	0.0303	0.0341	0.0306	0.0373	0.0309
DG(19:0_18:2)	DG	diacyl	2379	[M+NH4]	DG(37:2)	(19:0_18:2)	(37:2)	634.554	21.301	C40 H74 O5	1	2	1	100	A	0.0149	0.0153	0.0158	0.0507	0.0493	0.0506	0.0229	0.0217	0.018	0.0611	0.0569	0.0627	0.0376	0.0443	0.0439	0.0397	0.0326	0.0346	0.0367	0.0371	0.0345
DG(19:0_18:1)	DG	diacyl	2384	[M+NH4]	DG(37:1)	(19:0_18:1)	(37:1)	636.569	21.699	C40 H76 O5	1	1	1	100	A	0.0064	0.0064	0.0058	0.0247	0.0254	0.0258	0.0101	0.01	0.0092	0.0292	0.0191	0.0274	0.0175	0.0201	0.0164	0.0162	0.0176	0.0127	0.0158	0.0193	0.0166
DG(18:0_19:0)	DG	diacyl	2385	[M+NH4]	DG(37:0)	(18:0_19:0)	(37:0)	638.585	22.037	C40 H78 O5	1	2	1	66.7	A	0.0019	0.0018	0.0019	0.0055	0.0036	0.0048	0.0022	0.0024	0.0018	0.0148	0.0108	0.0134	0.0064	0.0066	0.0061	0.0032	0.0027	0.0026	0.0044	0.004	0.0038
DG(18:2_20:4)	DG	diacyl	2389	[M+NH4]	DG(38:6)	(18:2_20:4)	(38:6)	640.507	18.418	C41 H68 O5	1	3	1	100	A	0.0052	0.0069	0.006	0.0219	0.0221	0.0218	0.0092	0.0096	0.0081	0.0167	0.014	0.0232	0.0099	0.011	0.0081	0.0129	0.0117	0.0136	0.0136	0.0114	0.0107
DG(16:1_22:5)	DG	diacyl	2390	[M+NH4]	DG(38:6)	(16:1_22:5)	(38:6)	640.507	18.641	C41 H68 O5	1	3	1	100	A	0.0043	0.0052	0.0042	0.0141	0.0116	0.0169	0.0054	0.0072	0.0059	0.0211	0.0123	0.0167	0.0071	0.0087	0.009	0.0081	0.0118	0.0093	0.0098	0.0093	0.0101
DG(18:2_20:4)	DG	diacyl	2393	[M+NH4]	DG(38:6)	(18:2_20:4)	(38:6)	640.507	18.995	C41 H68 O5	2	3	1	100	A	0.2254	0.2282	0.2186	0.6377	0.6345	0.6013	0.3068	0.301	0.2722	0.6698	0.6241	0.7161	0.505	0.4687	0.469	0.5254	0.45	0.4959	0.5575	0.5221	0.4453
DG(16:0_22:6)	DG	diacyl	2394	[M+NH4]	DG(38:6)	(16:0_22:6)	(38:6)	640.507	19.834	C41 H68 O5	1	3	1	100	A	0.0394	0.0334	0.0335	0.0896	0.0986	0.1039	0.049	0.0492	0.0393	0.1171	0.1129	0.1277	0.0727	0.0802	0.0711	0.0834	0.0764	0.0766	0.0743	0.075	0.0658
DG(18:2_20:3)	DG	diacyl	2351	[M+NH4]	DG(38:5)	(18:2_20:3)	(38:5)	642.522	19.489	C41 H70 O5	1	3	1	100	A	0.0037	0.0035	0.003	0.0085	0.0087	0.0082	0.0045	0.0043	0.004	0.0085	0.0075	0.0099	0.0074	0.0074	0.0074	0.0085	0.008	0.0063	0.0063	0.0071	0.0065
DG(18:2_20:3)	DG	diacyl	2352	[M+NH4]	DG(38:5)	(18:2_20:3)	(38:5)	642.522	19.861	C41 H70 O5	1	3	1	66.7	A	0.0231	0.0238	0.0234	0.0709	0.0785	0.0781	0.0362	0.0393	0.0302	0.0946	0.0855	0.0944	0.0515	0.053	0.046	0.0556	0.0476	0.0478	0.054	0.0502	0.0527
DG(18:1_20:4)	DG	diacyl	2354	[M+NH4]	DG(38:5)	(18:1_20:4)	(38:5)	642.522	20.224	C41 H70 O5	2	3	1	100	A	0.1793	0.1951	0.1851	0.4836	0.4949	0.5337	0.247	0.2249	0.2201	0.516	0.4507	0.5659	0.3802	0.4429	0.3472	0.4195	0.405	0.43	0.3756	0.4009	0.3769
DG(18:2_20:2)	DG	diacyl	2397	[M+NH4]	DG(38:4)	(18:2_20:2)	(38:4)	644.538	20.584	C41 H72 O5	1	3	1	100	A	0.083	0.0878	0.0813	0.2439	0.2634	0.2886	0.1195	0.1294	0.1071	0.2944	0.28	0.3086	0.1681	0.1778	0.1673	0.1829	0.1601	0.1765	0.1765	0.1891	0.17
DG(18:0_20:4)	DG	diacyl	2399	[M+NH4]	DG(38:4)	(18:0_20:4)	(38:4)	644.538	20.983	C41 H72 O5	1	3	1	100	A	0.0191	0.0169	0.0184	0.0519	0.0552	0.0521	0.0255	0.0247	0.0215	0.054	0.0504	0.0628	0.045	0.049	0.0478	0.0442	0.0424	0.0447	0.0475	0.0452	0.0369
DG(18:1_20:2)	DG	diacyl	2468	[M+NH4]	DG(38:3)	(18:1_20:2)	(38:3)	646.554	21.103	C41 H74 O5	1	2	1	100	A	0.0965	0.1234	0.1194	0.4044	0.4454	0.3616	0.184	0.1923	0.1573	0.415	0.3562	0.5616	0.2306	0.2567	0.2452	0.2596	0.266	0.2899	0.2694	0.2694	0.2229
DG(18:1_20:1)	DG	diacyl	2519	[M+NH4]	DG(38:2)	(18:1_20:1)	(38:2)	648.569	21.494	C41 H76 O5	1	3	1	100	A	0.086	0.0827	0.0825	0.2856	0.2788	0.2976	0.1349	0.1295	0.1109	0.3678	0.296	0.3721	0.2095	0.223	0.21	0.2151	0.1736	0.1968	0.1877	0.2245	0.1819
DG(16:0_22:1)	DG	diacyl	2538	[M+NH4]	DG(38:1)	(16:0_22:1)	(38:1)	650.585	21.887	C41 H78 O5	1	1	1	100	A	0.0162	0.0164	0.0133	0.0505	0.0506	0.0487	0.0234	0.0241	0.0204	0.0734	0.0559	0.0783	0.0382	0.0471	0.0421	0.039	0.0313	0.0368	0.0353	0.04	0.0335
DG(16:0_22:0)	DG	diacyl	2546	[M+NH4]	DG(38:0)	(16:0_22:0)	(38:0)	652.601	22.205	C41 H80 O5	1	2	1	66.7	A	0.0047	0.004	0.0043	0.0131	0.0112	0.0104	0.0055	0.0056	0.0056	0.0325	0.0355	0.0304	0.016	0.0179	0.016	0.009	0.0086	0.0081	0.0143	0.0144	0.0139
DG(18:3_22:6)	DG	diacyl	2553	[M+NH4]	DG(40:9)	(18:3_22:6)	(40:9)	662.491	16.504	C43 H66 O5	1	1	2	100	A	0.0048	0.0057	0.0051	0.0136	0.0156	0.0159	0.0068	0.0074	0.0057	0.0156	0.0161	0.0187	0.0082	0.0089	0.0089	0.0109	0.0104	0.0092	0.0109	0.0098	0.01
DG(21:0_18:2)	DG	diacyl	2680	[M+NH4]	DG(39:2)	(21:0_18:2)	(39:2)	662.585	21.788	C42 H78 O5	1	1	1	66.7	A	0.0012	0.001	0.0012	0.0047	0.0039	0.0039	0.002	0.0019	0.0012	0.004	0.0037	0.0022	0.0032	0.0037	0.0031	0.0033	0.0027	0.003	0.0028	0.0043	0.0027
DG(18:2_22:6)	DG	diacyl	2584	[M+NH4]	DG(40:8)	(18:2_22:6)	(40:8)	664.507	18.288	C43 H68 O5	2	2	1	100	A	0.1116	0.1242	0.1137	0.3349	0.3512	0.3512	0.1699	0.1803	0.1416	0.3343	0.3016	0.41	0.1916	0.2267	0.2071	0.2465	0.2454	0.2443	0.2485	0.2568	0.215
DG(21:0_18:1)	DG	diacyl	2555	[M+NH4]	DG(39:1)	(21:0_18:1)	(39:1)	664.601	22.054	C42 H80 O5	1	1	1	100	A	0.0016	0.0018	0.0015	0.0051	0.0058	0.0057	0.0023	0.0022	0.0021	0.0108	0.01	0.0116	0.0055	0.0063	0.0059	0.004	0.0039	0.0039	0.0046	0.0045	0.0042
DG(18:2_22:5)	DG	diacyl	2560	[M+NH4]	DG(40:7)	(18:2_22:5)	(40:7)	666.522	19.223	C43 H70 O5	2	3	1	100	A	0.0277	0.0314	0.0315	0.0808	0.0857	0.088	0.0486	0.0475	0.0418	0.0646	0.0611	0.0698	0.0306	0.0327	0.0306	0.0609	0.0515	0.0594	0.0488	0.0502	0.0418
DG(18:2_22:5)	DG	diacyl	2561	[M+NH4]	DG(40:7)	(18:2_22:5)	(40:7)	666.522	19.798	C43 H70 O5	1	3	1	100	A	0.0052	0.0056	0.0067	0.0193	0.0167	0.0195	0.0098	0.009	0.0061	0.0148	0.0131	0.0207	0.0111	0.0137	0.0113	0.0139	0.013	0.0128	0.0151	0.0145	0.0126
DG(18:1_22:6)	DG	diacyl	2562	[M+NH4]	DG(40:7)	(18:1_22:6)	(40:7)	666.522	19.939	C43 H70 O5	2	3	1	100	A	0.0919	0.0884	0.0871	0.2476	0.2772	0.2675	0.1334	0.1261	0.11	0.2915	0.2788	0.305	0.1792	0.1923	0.1828	0.2006	0.1644	0.1922	0.1928	0.2035	0.1703
DG(18:1_22:5)	DG	diacyl	2573	[M+NH4]	DG(40:6)	(18:1_22:5)	(40:6)	668.538	20.569	C43 H72 O5	1	5	1	100	A	0.0108	0.0094	0.0087	0.0235	0.0274	0.0273	0.0134	0.0137	0.0122	0.0265	0.0271	0.0326	0.0176	0.0202	0.0176	0.0199	0.0183	0.0184	0.0186	0.021	0.0199
DG(18:0_22:6)	DG	diacyl	2574	[M+NH4]	DG(40:6)	(18:0_22:6)	(40:6)	668.538	20.8	C43 H72 O5	1	5	1	100	A	0.0038	0.0054	0.0056	0.0164	0.0167	0.0179	0.0065	0.0084	0.0058	0.019	0.0194	0.0252	0.012	0.0107	0.0125	0.0114	0.0118	0.0125	0.0131	0.012	0.011
DG(18:2_22:2)	DG	diacyl	2586	[M+NH4]	DG(40:4)	(18:2_22:2)	(40:4)	672.569	21.194	C43 H76 O5	1	1	1	100	A	0.0037	0.0045	0.0039	0.0137	0.0148	0.0149	0.0059	0.0063	0.0053	0.0154	0.0143	0.0135	0.0087	0.0115	0.0099	0.0123	0.008	0.0093	0.0097	0.0098	0.009
DG(22:1_18:2)	DG	diacyl	2588	[M+NH4]	DG(40:3)	(22:1_18:2)	(40:3)	674.585	21.571	C43 H78 O5	1	1	1	100	A	0.0064	0.0065	0.0067	0.0225	0.0297	0.0276	0.0104	0.0116	0.0105	0.0235	0.0245	0.0361	0.0125	0.0171	0.0116	0.018	0.0176	0.0189	0.0158	0.0179	0.0161
DG(18:1_22:1)	DG	diacyl	2590	[M+NH4]	DG(40:2)	(18:1_22:1)	(40:2)	676.601	21.871	C43 H80 O5	1	1	1	100	A	0.0064	0.0046	0.0057	0.0211	0.0216	0.0212	0.0095	0.0102	0.0087	0.0316	0.0308	0.0338	0.0174	0.015	0.0163	0.0152	0.013	0.0151	0.0149	0.0174	0.0157
DG(16:0_24:1)	DG	diacyl	2594	[M+NH4]	DG(40:1)	(16:0_24:1)	(40:1)	678.616	22.2	C43 H82 O5	1	1	0	100	A	0.0044	0.0048	0.0043	0.0167	0.0155	0.0161	0.0072	0.0071	0.0064	0.0212	0.0235	0.0288	0.0139	0.0147	0.0164	0.0119	0.0092	0.0108	0.013	0.0129	0.0121
DG(16:0_24:0)	DG	diacyl	2597	[M+NH4]	DG(40:0)	(16:0_24:0)	(40:0)	680.632	22.51	C43 H84 O5	1	2	0	100	A	0.0024	0.0032	0.0028	0.0084	0.0077	0.0068	0.0032	0.0035	0.0032	0.017	0.0146	0.0144	0.011	0.0124	0.011	0.0059	0.0051	0.0059	0.0089	0.0096	0.0085
DG(18:2_24:6)	DG	diacyl	2604	[M+NH4]	DG(42:8)	(18:2_24:6)	(42:8)	692.538	19.784	C45 H72 O5	1	1	0	100	A	0.0029	0.0033	0.003	0.0094	0.0089	0.0095	0.0047	0.0051	0.0043	0.0094	0.0107	0.0119	0.007	0.0076	0.0083	0.0088	0.0069	0.0068	0.0076	0.0074	0.0054
DG(18:1_24:6)	DG	diacyl	2610	[M+NH4]	DG(42:7)	(18:1_24:6)	(42:7)	694.554	20.569	C45 H74 O5	1	1	0	100	A	0.006	0.0051	0.0052	0.0153	0.0192	0.0169	0.0075	0.0075	0.0069	0.0176	0.0159	0.0168	0.0109	0.0122	0.0112	0.0138	0.0115	0.0121	0.0124	0.0134	0.0109
DG(24:1_18:2)	DG	diacyl	2617	[M+NH4]	DG(42:3)	(24:1_18:2)	(42:3)	702.616	21.929	C45 H82 O5	1	1	0	100	A	0.0051	0.0045	0.0044	0.0167	0.0184	0.0186	0.0079	0.0073	0.0071	0.0225	0.0223	0.0309	0.011	0.0152	0.0113	0.0136	0.0114	0.0124	0.0129	0.0149	0.0117
DG(18:1_24:1)	DG	diacyl	2618	[M+NH4]	DG(42:2)	(18:1_24:1)	(42:2)	704.632	22.185	C45 H84 O5	1	1	0	100	A	0.0034	0.0031	0.003	0.0121	0.0087	0.0123	0.0053	0.0054	0.0044	0.0253	0.0223	0.0248	0.0118	0.0155	0.0134	0.0105	0.0089	0.0087	0.0107	0.0115	0.0096
DG(24:0_18:1)	DG	diacyl	2622	[M+NH4]	DG(42:1)	(24:0_18:1)	(42:1)	706.648	22.51	C45 H86 O5	1	1	0	100	A	0.0035	0.0031	0.0032	0.0128	0.0134	0.0141	0.0043	0.0052	0.0046	0.0237	0.027	0.0253	0.0146	0.016	0.0135	0.0093	0.0102	0.0096	0.0117	0.0122	0.0109
Hex1Cer(d18:1_22:0)	Hex1Cer	Ceramide monosaccharides	754	[M+H]	Hex1Cer(d40:1)	(d18:1_22:0)	(d40:1)	783.659	20.874	C46 H89 N1 O8	2	2	0	100	A	0.0984	0.1038	0.097	0.0948	0.0929	0.094	0.0956	0.1082	0.1343	0.1084	0.1145	0.076	0.1218	0.1326	0.1292	0.1016	0.072	0.1237	0.1174	0.1366	0.1277
Hex1Cer(d18:1_24:1)	Hex1Cer	Ceramide monosaccharides	779	[M+H]	Hex1Cer(d42:2)	(d18:1_24:1)	(d42:2)	809.674	20.847	C48 H91 N1 O8	2	2	0	100	B	0.0977	0.0857	0.0811	0.0945	0.0909	0.0861	0.0876	0.0769	0.0907	0.0834	0.0878	0.0843	0.0951	0.1016	0.0954	0.0914	0.1059	0.1031	0.104	0.1002	0.1228
LPC(14:0)	LPC	monoacyl	141	[M+H]	LPC(14:0)	(14:0)	(14:0)	467.301	4.342	C22 H46 N1 O7 P1	2	1	2	100	A	0.0076	0.0084	0.0077	0.006	0.0062	0.0064	0.0081	0.008	0.0094	0.0057	0.0056	0.006	0.01	0.0095	0.009	0.0075	0.0079	0.0077	0.0099	0.0093	0.0094
LPC(14:0)	LPC	monoacyl	142	[M+H]	LPC(14:0)	(14:0)	(14:0)	467.301	4.636	C22 H46 N1 O7 P1	2	1	2	100	A	0.0038	0.0041	0.0043	0.0038	0.0041	0.0042	0.0047	0.0043	0.005	0.0024	0.0029	0.0023	0.0031	0.004	0.0035	0.0034	0.0038	0.0035	0.0043	0.0045	0.0047
LPC(15:0)	LPC	monoacyl	474	[M+H]	LPC(15:0)	(15:0)	(15:0)	481.317	4.999	C23 H48 N1 O7 P1	1	1	1	100	C	0.0045	0.0043	0.0048	0.0043	0.0047	0.0043	0.0058	0.0045	0.0054	0.0053	0.0042	0.0034	0.0048	0.0057	0.0052	0.0048	0.0053	0.0063	0.0065	0.0061	0.0048
LPC(15:0)	LPC	monoacyl	475	[M+H]	LPC(15:0)	(15:0)	(15:0)	481.317	5.251	C23 H48 N1 O7 P1	1	1	1	100	C	0.0157	0.0159	0.0147	0.0149	0.0139	0.0159	0.0139	0.0147	0.017	0.0134	0.0128	0.0127	0.0156	0.0151	0.0159	0.0157	0.0147	0.015	0.0187	0.0164	0.0172
LPC(16:1)	LPC	monoacyl	222	[M+H]	LPC(16:1)	(16:1)	(16:1)	493.317	4.709	C24 H48 N1 O7 P1	3	1	2	100	A	0.0595	0.0668	0.0681	0.0502	0.0539	0.0504	0.0668	0.0719	0.0725	0.0474	0.0463	0.0444	0.0653	0.0681	0.064	0.058	0.0629	0.0605	0.0801	0.0698	0.0705
LPC(16:1)	LPC	monoacyl	223	[M+H]	LPC(16:1)	(16:1)	(16:1)	493.317	4.953	C24 H48 N1 O7 P1	2	1	2	100	A	0.0223	0.0234	0.0228	0.0216	0.0217	0.0245	0.0187	0.0236	0.0222	0.0166	0.0149	0.016	0.0197	0.0189	0.0209	0.0196	0.0246	0.0232	0.0196	0.02	0.0251
LPC(16:0)	LPC	monoacyl	37	[M+H]	LPC(16:0)	(16:0)	(16:0)	495.332	5.602	C24 H50 N1 O7 P1	4	1	3	100	A	0.6595	0.7016	0.7116	0.5413	0.5616	0.5746	0.7226	0.7162	0.7836	0.5346	0.5224	0.4558	0.8204	0.7774	0.7117	0.7413	0.6919	0.7939	0.8303	0.9006	0.8446
LPC(16:0)	LPC	monoacyl	38	[M+H]	LPC(16:0)	(16:0)	(16:0)	495.332	5.832	C24 H50 N1 O7 P1	4	1	3	100	A	3.0446	3.2992	3.3366	2.7987	2.9342	2.8845	3.6342	3.7374	4.0221	3.0937	2.9906	2.9212	3.2698	3.3633	3.3376	3.5989	3.4481	3.6181	3.6237	3.7386	3.7082
LPC(17:2)	LPC	monoacyl	488	[M+H]	LPC(17:2)	(17:2)	(17:2)	505.317	4.523	C25 H48 N1 O7 P1	1	1	1	100	C	0.0015	0.0017	0.0017	0.0013	0.0014	0.0013	0.0017	0.0015	0.0016	0.0013	0.0011	0.0012	0.0017	0.0019	0.0014	0.0013	0.0013	0.0016	0.002	0.0015	0.0019
LPC(P-18:1)	LPC	monoalkenyl	496	[M+H]	LPC(P-18:1)	(P-18:1)	(P-18:1)	505.353	6.439	C26 H52 N1 O6 P1	1	1	1	100	C	0.0043	0.0045	0.0043	0.0038	0.0042	0.0045	0.0051	0.0046	0.0053	0.0039	0.0038	0.0038	0.0039	0.0043	0.004	0.005	0.0047	0.0048	0.0047	0.0049	0.0054
LPC(17:1)	LPC	monoacyl	248	[M+H]	LPC(17:1)	(17:1)	(17:1)	507.332	5.284	C25 H50 N1 O7 P1	2	1	2	100	A	0.0055	0.0063	0.0059	0.0051	0.0046	0.0044	0.006	0.006	0.0059	0.005	0.0042	0.0048	0.0067	0.0064	0.0067	0.0059	0.0063	0.0061	0.0072	0.0064	0.0062
LPC(17:0)	LPC	monoacyl	255	[M+H]	LPC(17:0)	(17:0)	(17:0)	509.348	6.399	C25 H52 N1 O7 P1	2	1	1	100	A	0.0392	0.0408	0.04	0.0327	0.0336	0.0354	0.0389	0.0403	0.0443	0.0343	0.0297	0.031	0.0383	0.0344	0.0362	0.0408	0.0396	0.0403	0.0459	0.0416	0.0459
LPC(18:4)	LPC	monoacyl	505	[M+H]	LPC(18:4)	(18:4)	(18:4)	515.301	3.755	C26 H46 N1 O7 P1	1	1	2	100	C	0.0013	0.0013	0.0014	0.001	0.0012	0.0011	0.0015	0.0015	0.0016	0.0011	0.001	0.0009	0.0012	0.0013	0.0013	0.0011	0.0012	0.0012	0.0016	0.0015	0.0015
LPC(18:3)	LPC	monoacyl	271	[M+H]	LPC(18:3)	(18:3)	(18:3)	517.317	4.53	C26 H48 N1 O7 P1	3	1	2	100	A	0.1498	0.1612	0.1654	0.1299	0.1397	0.1379	0.1653	0.1567	0.1759	0.1206	0.1154	0.1122	0.1692	0.175	0.1721	0.1533	0.1594	0.1567	0.1965	0.179	0.1895
LPC(18:2)	LPC	monoacyl	70	[M+H]	LPC(18:2)	(18:2)	(18:2)	519.332	5.105	C26 H50 N1 O7 P1	4	1	2	100	A	6.6658	7.4836	7.068	6.0424	6.1323	5.7554	7.7907	7.6741	7.8772	6.4748	6.2699	5.7074	7.4483	7.7255	7.4272	8.658	8.4803	8.2396	8.4464	8.0483	7.9392
LPC(18:2)	LPC	monoacyl	72	[M+H]	LPC(18:2)	(18:2)	(18:2)	519.332	5.319	C26 H50 N1 O7 P1	3	1	2	100	A	1.1283	1.0978	1.0308	1.3587	1.5888	1.5968	1.3081	1.1477	1.3127	0.5032	0.5897	0.5991	0.8913	0.7379	0.799	1.4454	1.2598	1.2508	1.4235	1.4648	1.3952
LPC(18:1)	LPC	monoacyl	92	[M+H]	LPC(18:1)	(18:1)	(18:1)	521.348	5.876	C26 H52 N1 O7 P1	3	1	8	100	A	0.9846	1.0533	1.066	0.8371	0.8176	0.8401	1.1305	1.1872	1.2739	0.9168	0.8986	0.8725	1.178	1.2443	1.228	1.2605	1.2297	1.2383	1.2386	1.2395	1.2499
LPC(18:0)	LPC	monoacyl	134	[M+H]	LPC(18:0)	(18:0)	(18:0)	523.364	6.989	C26 H54 N1 O7 P1	4	1	2	100	A	1.5651	1.8061	1.7351	1.4742	1.482	1.4725	1.7907	1.7763	1.8795	1.6543	1.6295	1.4941	1.6428	1.6652	1.5885	1.831	1.7407	1.8759	2.0263	1.9072	1.9642
LPC(19:4)	LPC	monoacyl	506	[M+H]	LPC(19:4)	(19:4)	(19:4)	529.317	4.497	C27 H48 N1 O7 P1	1	1	0	66.7	C	0.002	0.0021	0.0024	0.0016	0.0014	0.0014	0.0023	0.002	0.0022	0.0015	0.0015	0.0015	0.0023	0.0021	0.0022	0.0018	0.0016	0.002	0.0024	0.0018	0.0025
LPC(19:0)	LPC	monoacyl	515	[M+H]	LPC(19:0)	(19:0)	(19:0)	537.379	7.741	C27 H56 N1 O7 P1	2	1	1	100	A	0.0202	0.0251	0.0242	0.0187	0.0192	0.019	0.0238	0.0238	0.0275	0.0223	0.0213	0.0207	0.0226	0.0206	0.0202	0.0231	0.0239	0.0242	0.026	0.0222	0.0242
LPC(20:5)	LPC	monoacyl	188	[M+H]	LPC(20:5)	(20:5)	(20:5)	541.317	4.38	C28 H48 N1 O7 P1	4	1	1	100	A	0.7078	0.7801	0.7621	0.5434	0.5857	0.5653	0.7115	0.6628	0.7593	0.6208	0.5966	0.5678	0.7969	0.7547	0.7891	0.6562	0.7029	0.6388	0.8818	0.8176	0.8444
LPC(20:4)	LPC	monoacyl	205	[M+H]	LPC(20:4)	(20:4)	(20:4)	543.332	5.041	C28 H50 N1 O7 P1	4	1	3	100	A	4.4199	4.9261	4.6509	3.564	4.2401	3.9227	5.3289	5.105	5.4705	4.352	4.277	4.0166	5.3724	4.9185	4.7409	5.4763	5.9536	5.7123	5.5945	5.2679	5.2785
LPC(20:4)	LPC	monoacyl	210	[M+H]	LPC(20:4)	(20:4)	(20:4)	543.332	5.237	C28 H50 N1 O7 P1	3	1	3	100	A	0.6232	0.589	0.6775	0.8364	1.0317	1.1913	0.876	0.8046	1.0317	0.1321	0.1408	0.2416	0.2747	0.2268	0.2664	0.8484	0.6974	0.997	0.7573	0.826	1.0061
LPC(20:3)	LPC	monoacyl	279	[M+H]	LPC(20:3)	(20:3)	(20:3)	545.348	5.452	C28 H52 N1 O7 P1	2	1	2	100	A	0.4117	0.4314	0.4296	0.3445	0.3584	0.3479	0.4332	0.4443	0.4845	0.3321	0.3203	0.3181	0.4981	0.4798	0.4767	0.4719	0.4611	0.4572	0.5128	0.5003	0.5199
LPC(20:3)	LPC	monoacyl	280	[M+H]	LPC(20:3)	(20:3)	(20:3)	545.348	5.703	C28 H52 N1 O7 P1	3	1	2	100	A	0.0284	0.0305	0.0335	0.0479	0.0383	0.0503	0.0474	0.0397	0.0516	0.0207	0.0211	0.0191	0.0262	0.0299	0.0275	0.0337	0.0343	0.0474	0.0484	0.0379	0.0334
LPC(20:2)	LPC	monoacyl	283	[M+H]	LPC(20:2)	(20:2)	(20:2)	547.364	6.039	C28 H54 N1 O7 P1	3	1	1	100	A	0.07	0.0734	0.0671	0.0591	0.0606	0.0589	0.0749	0.0669	0.0739	0.0604	0.0582	0.0592	0.0854	0.0854	0.0869	0.0819	0.0823	0.0798	0.0959	0.0852	0.087
LPC(20:2)	LPC	monoacyl	284	[M+H]	LPC(20:2)	(20:2)	(20:2)	547.364	6.272	C28 H54 N1 O7 P1	2	1	1	100	A	0.025	0.0281	0.026	0.0181	0.0269	0.0284	0.0267	0.0287	0.0317	0.0226	0.0201	0.0198	0.0188	0.0172	0.0277	0.0341	0.0213	0.0316	0.0314	0.0317	0.0248
LPC(20:1)	LPC	monoacyl	296	[M+H]	LPC(20:1)	(20:1)	(20:1)	549.379	6.89	C28 H56 N1 O7 P1	2	1	3	100	A	0.0048	0.0049	0.005	0.004	0.0042	0.004	0.0051	0.0053	0.0055	0.0042	0.004	0.0038	0.006	0.0061	0.0061	0.0066	0.0061	0.006	0.0061	0.0059	0.0059
LPC(20:1)	LPC	monoacyl	297	[M+H]	LPC(20:1)	(20:1)	(20:1)	549.379	7.173	C28 H56 N1 O7 P1	3	1	3	100	A	0.0229	0.0259	0.0251	0.0208	0.0211	0.0219	0.0227	0.0239	0.0277	0.0209	0.0209	0.0212	0.026	0.0235	0.0247	0.0265	0.0263	0.0262	0.0295	0.0274	0.0284
LPC(20:0)	LPC	monoacyl	525	[M+H]	LPC(20:0)	(20:0)	(20:0)	551.395	8.492	C28 H58 N1 O7 P1	2	1	1	100	A	0.0102	0.0116	0.0109	0.0082	0.0085	0.0068	0.0109	0.0105	0.01	0.0084	0.009	0.0082	0.01	0.008	0.0098	0.0111	0.0104	0.0105	0.0115	0.0112	0.0121
LPC(22:6)	LPC	monoacyl	242	[M+H]	LPC(22:6)	(22:6)	(22:6)	567.332	4.953	C30 H50 N1 O7 P1	4	1	1	100	A	0.71	0.7689	0.7752	0.593	0.5686	0.553	0.6978	0.6945	0.7638	0.6144	0.5878	0.5841	0.8023	0.8045	0.7929	0.7196	0.8408	0.7908	0.9282	0.8563	0.7734
LPC(22:6)	LPC	monoacyl	245	[M+H]	LPC(22:6)	(22:6)	(22:6)	567.332	5.132	C30 H50 N1 O7 P1	2	1	1	100	A	0.0419	0.0538	0.0417	0.0676	0.1054	0.1059	0.0712	0.07	0.0789	0.0201	0.019	0.0226	0.0303	0.0278	0.0197	0.0936	0.0802	0.0891	0.0747	0.0578	0.0689
LPC(22:5)	LPC	monoacyl	303	[M+H]	LPC(22:5)	(22:5)	(22:5)	569.348	5.246	C30 H52 N1 O7 P1	3	1	2	100	A	0.1276	0.1398	0.1183	0.1056	0.1022	0.1049	0.1166	0.1353	0.1399	0.1129	0.1039	0.1063	0.1521	0.152	0.1573	0.1514	0.1436	0.1474	0.1711	0.1468	0.1617
LPC(22:5)	LPC	monoacyl	305	[M+H]	LPC(22:5)	(22:5)	(22:5)	569.348	5.523	C30 H52 N1 O7 P1	2	1	2	100	A	0.0491	0.047	0.0491	0.0406	0.0412	0.04	0.0499	0.0518	0.0547	0.0455	0.0494	0.0406	0.0636	0.0594	0.0573	0.0563	0.0573	0.0511	0.0598	0.0651	0.061
LPC(22:4)	LPC	monoacyl	432	[M+H]	LPC(22:4)	(22:4)	(22:4)	571.364	5.814	C30 H54 N1 O7 P1	2	1	1	100	A	0.0296	0.0339	0.0344	0.0249	0.0266	0.0285	0.0358	0.0385	0.0394	0.0277	0.0296	0.0293	0.0396	0.0403	0.038	0.0391	0.0367	0.0376	0.039	0.0405	0.0403
LPC(22:0)	LPC	monoacyl	539	[M+H]	LPC(22:0)	(22:0)	(22:0)	579.426	10.153	C30 H62 N1 O7 P1	1	1	1	100	C	0.0062	0.0067	0.0061	0.0053	0.0054	0.0052	0.0069	0.0068	0.0072	0.0059	0.0055	0.0056	0.0062	0.006	0.0056	0.0073	0.0073	0.0073	0.0073	0.0071	0.0073
LPC(24:6)	LPC	monoacyl	542	[M+H]	LPC(24:6)	(24:6)	(24:6)	595.364	5.625	C32 H54 N1 O7 P1	1	1	0	100	C	0.0023	0.0024	0.0025	0.0017	0.0017	0.0017	0.0022	0.0021	0.0022	0.0019	0.0021	0.0017	0.0027	0.0023	0.0023	0.0023	0.0026	0.0025	0.0026	0.0022	0.0029
LPC(24:1)	LPC	monoacyl	551	[M+H]	LPC(24:1)	(24:1)	(24:1)	605.442	10.136	C32 H64 N1 O7 P1	1	1	1	100	C	0.0063	0.0072	0.0073	0.006	0.0064	0.0062	0.0081	0.0073	0.0085	0.0066	0.0064	0.0059	0.0072	0.007	0.0062	0.0084	0.0077	0.0081	0.0079	0.0079	0.007
LPC(24:0)	LPC	monoacyl	456	[M+H]	LPC(24:0)	(24:0)	(24:0)	607.458	12.247	C32 H66 N1 O7 P1	2	1	1	100	A	0.0199	0.0217	0.022	0.0189	0.0203	0.0205	0.0238	0.0227	0.0238	0.0207	0.0202	0.0194	0.0199	0.02	0.0195	0.0263	0.0261	0.0238	0.0255	0.024	0.0253
LPE(O-16:1)	LPE	monoalkyl	3	[M+H]	LPE(O-16:1)	(O-16:1)	(O-16:1)	437.291	6.377	C21 H44 N1 O6 P1	1	1	0	100	C	0.3976	0.449	0.3759	0.3508	0.3401	0.3461	0.4323	0.4162	0.5	0.3446	0.3423	0.3243	0.3907	0.4271	0.4294	0.4097	0.4503	0.4339	0.4601	0.4577	0.4775
LPE(16:1)	LPE	monoacyl	10	[M+H]	LPE(16:1)	(16:1)	(16:1)	451.27	4.797	C21 H42 N1 O7 P1	2	1	2	100	A	0.0249	0.0261	0.0252	0.0221	0.0226	0.0216	0.0283	0.027	0.032	0.0209	0.0216	0.02	0.0307	0.0364	0.0327	0.0269	0.0308	0.0251	0.0309	0.0304	0.0332
LPE(16:1)	LPE	monoacyl	11	[M+H]	LPE(16:1)	(16:1)	(16:1)	451.27	5.026	C21 H42 N1 O7 P1	2	1	2	100	A	0.0217	0.023	0.0189	0.0222	0.0139	0.0153	0.0223	0.0178	0.0229	0.0126	0.0147	0.0138	0.0192	0.0255	0.025	0.024	0.0193	0.0249	0.015	0.0211	0.0234
LPE(16:0)	LPE	monoacyl	12	[M+H]	LPE(16:0)	(16:0)	(16:0)	453.286	5.677	C21 H44 N1 O7 P1	2	1	2	100	A	0.0855	0.0902	0.0825	0.0753	0.0755	0.0743	0.095	0.0842	0.1014	0.0634	0.0687	0.07	0.0945	0.1097	0.1044	0.093	0.1045	0.0973	0.0932	0.1063	0.1046
LPE(16:0)	LPE	monoacyl	14	[M+H]	LPE(16:0)	(16:0)	(16:0)	453.286	5.897	C21 H44 N1 O7 P1	2	1	2	100	A	0.8099	0.8809	0.825	0.7559	0.7135	0.6938	0.85	0.8219	0.9504	0.7073	0.7403	0.706	0.8501	0.9034	0.9006	0.8569	0.9659	0.8606	1.003	0.9307	0.9612
LPE(O-18:3)	LPE	monoalkyl	17	[M+H]	LPE(O-18:3)	(O-18:3)	(O-18:3)	461.291	5.776	C23 H44 N1 O6 P1	1	1	0	100	C	0.0584	0.059	0.0551	0.049	0.0527	0.0492	0.0631	0.0619	0.0703	0.0466	0.0496	0.0503	0.0532	0.0617	0.059	0.0621	0.0607	0.0627	0.065	0.0662	0.0719
LPE(O-18:2)	LPE	monoalkyl	18	[M+H]	LPE(O-18:2)	(O-18:2)	(O-18:2)	463.306	6.61	C23 H46 N1 O6 P1	1	1	0	100	C	0.381	0.3724	0.3542	0.3621	0.3438	0.3285	0.3494	0.3501	0.4041	0.3002	0.2918	0.3574	0.321	0.4116	0.3394	0.3814	0.4302	0.4186	0.4244	0.3849	0.4567
LPE(O-18:1)	LPE	monoalkyl	28	[M+H]	LPE(O-18:1)	(O-18:1)	(O-18:1)	465.322	7.809	C23 H48 N1 O6 P1	1	1	1	66.7	C	0.3341	0.4003	0.3118	0.2722	0.2979	0.271	0.3386	0.2883	0.4322	0.2637	0.2949	0.319	0.3055	0.3061	0.3556	0.3416	0.3852	0.3821	0.3991	0.3869	0.3929
LPE(17:0)	LPE	monoacyl	30	[M+H]	LPE(17:0)	(17:0)	(17:0)	467.301	6.509	C22 H46 N1 O7 P1	2	1	1	100	A	0.0182	0.0216	0.0199	0.0242	0.0157	0.0203	0.0223	0.024	0.0248	0.0188	0.021	0.0199	0.0227	0.0247	0.0212	0.024	0.0253	0.0233	0.0222	0.0249	0.0298
LPE(18:3)	LPE	monoacyl	31	[M+H]	LPE(18:3)	(18:3)	(18:3)	475.27	4.45	C23 H42 N1 O7 P1	2	1	4	100	A	0.0498	0.0604	0.0555	0.0463	0.0485	0.0455	0.056	0.0575	0.0591	0.0414	0.0461	0.0443	0.0576	0.0736	0.0631	0.0524	0.0595	0.0558	0.0654	0.0607	0.0653
LPE(18:2)	LPE	monoacyl	34	[M+H]	LPE(18:2)	(18:2)	(18:2)	477.286	5.183	C23 H44 N1 O7 P1	2	1	2	100	A	3.6345	4.1749	3.623	3.3197	3.0812	3.0718	3.5557	3.4913	3.9654	3.0319	3.0423	2.9754	3.8749	4.5811	4.4291	3.693	4.1729	4.1345	4.5158	4.165	4.2573
LPE(18:2)	LPE	monoacyl	35	[M+H]	LPE(18:2)	(18:2)	(18:2)	477.286	5.375	C23 H44 N1 O7 P1	2	1	2	100	A	0.3041	0.3193	0.2864	0.3647	0.4841	0.4958	0.2956	0.4051	0.4239	0.1098	0.161	0.1708	0.1981	0.226	0.1963	0.3433	0.4171	0.5092	0.3373	0.3854	0.459
LPE(18:1)	LPE	monoacyl	41	[M+H]	LPE(18:1)	(18:1)	(18:1)	479.301	5.909	C23 H46 N1 O7 P1	2	1	4	100	A	0.7762	0.8144	0.8149	0.6839	0.6517	0.6347	0.8274	0.8046	0.9083	0.688	0.7002	0.672	0.91	1.0298	0.9813	0.8369	0.9445	0.869	0.9491	0.9369	0.9599
LPE(18:1)	LPE	monoacyl	42	[M+H]	LPE(18:1)	(18:1)	(18:1)	479.301	6.132	C23 H46 N1 O7 P1	2	1	4	100	A	0.7558	0.7716	0.7223	0.6753	0.7061	0.6923	0.7885	0.7963	0.8796	0.7105	0.6544	0.6237	0.7478	0.7957	0.794	0.8029	0.8473	0.8548	0.9251	0.8726	0.8929
LPE(18:0)	LPE	monoacyl	52	[M+H]	LPE(18:0)	(18:0)	(18:0)	481.317	7.179	C23 H48 N1 O7 P1	2	1	2	100	A	1.7384	1.9663	1.7901	1.4948	1.5458	1.5229	1.7349	1.7289	1.9989	1.4674	1.5814	1.567	1.8063	1.8887	1.9382	1.8589	2.0274	1.9054	2.0779	2.0011	1.956
LPE(18:0)	LPE	monoacyl	55	[M+H]	LPE(18:0)	(18:0)	(18:0)	481.317	7.842	C23 H48 N1 O7 P1	2	1	2	100	A	0.04	0.045	0.0328	0.0193	0.028	0.0256	0.0344	0.0324	0.0432	0.0266	0.0378	0.0388	0.0256	0.0343	0.0373	0.0329	0.0437	0.0338	0.0386	0.0409	0.0324
LPE(O-20:3)	LPE	monoalkyl	63	[M+H]	LPE(O-20:3)	(O-20:3)	(O-20:3)	489.322	6.9	C25 H48 N1 O6 P1	1	1	0	66.7	C	0.0036	0.0047	0.004	0.0033	0.0036	0.0037	0.0054	0.0052	0.0048	0.0035	0.0032	0.0037	0.0036	0.0042	0.0048	0.0055	0.0049	0.0048	0.004	0.005	0.0046
LPE(O-20:1)	LPE	monoalkyl	66	[M+H]	LPE(O-20:1)	(O-20:1)	(O-20:1)	493.353	9.352	C25 H52 N1 O6 P1	1	1	0	100	C	0.0089	0.0124	0.01	0.0073	0.0081	0.0086	0.0071	0.0073	0.0119	0.0086	0.0081	0.0091	0.0094	0.0109	0.0087	0.0108	0.0103	0.0091	0.0088	0.0098	0.0097
LPE(20:5)	LPE	monoacyl	74	[M+H]	LPE(20:5)	(20:5)	(20:5)	499.27	4.454	C25 H42 N1 O7 P1	2	1	2	100	A	0.3778	0.4181	0.4012	0.35	0.3086	0.3238	0.402	0.3859	0.4538	0.3115	0.3252	0.3296	0.4295	0.5059	0.4667	0.3781	0.4289	0.4045	0.4652	0.4626	0.4962
LPE(20:5)	LPE	monoacyl	76	[M+H]	LPE(20:5)	(20:5)	(20:5)	499.27	5.2	C25 H42 N1 O7 P1	1	1	2	100	C	0.0399	0.0421	0.0397	0.0309	0.0306	0.0306	0.0363	0.0389	0.0389	0.0422	0.0486	0.0503	0.0486	0.0413	0.0389	0.0545	0.0503	0.0476	0.0369	0.036	0.0404
LPE(20:4)	LPE	monoacyl	101	[M+H]	LPE(20:4)	(20:4)	(20:4)	501.286	5.136	C25 H44 N1 O7 P1	2	1	4	100	A	5.2429	5.7459	5.1871	4.538	4.5717	4.6513	5.3435	5.2799	6.0246	4.2963	4.4754	4.3797	5.8559	6.6879	6.2121	5.6898	6.3842	6.2107	6.1256	6.2014	5.9234
LPE(20:3)	LPE	monoacyl	157	[M+H]	LPE(20:3)	(20:3)	(20:3)	503.301	5.558	C25 H46 N1 O7 P1	2	1	6	100	A	0.2788	0.3135	0.2903	0.2593	0.2566	0.2493	0.3058	0.3077	0.3405	0.2265	0.2354	0.2341	0.3201	0.3715	0.3364	0.311	0.3258	0.3388	0.3405	0.3619	0.3519
LPE(20:3)	LPE	monoacyl	158	[M+H]	LPE(20:3)	(20:3)	(20:3)	503.301	5.815	C25 H46 N1 O7 P1	1	1	6	66.7	A	0.022	0.0273	0.0235	0.0193	0.019	0.0226	0.0305	0.0292	0.0305	0.0162	0.0128	0.0165	0.0243	0.0304	0.0277	0.0325	0.0322	0.0215	0.0269	0.0198	0.0233
LPE(20:2)	LPE	monoacyl	168	[M+H]	LPE(20:2)	(20:2)	(20:2)	505.317	6.182	C25 H48 N1 O7 P1	2	1	2	100	A	0.1198	0.1286	0.1173	0.1055	0.1036	0.0996	0.1107	0.1327	0.1379	0.1178	0.1112	0.1121	0.1431	0.158	0.1523	0.1334	0.1401	0.1469	0.162	0.1508	0.1433
LPE(20:2)	LPE	monoacyl	170	[M+H]	LPE(20:2)	(20:2)	(20:2)	505.317	6.397	C25 H48 N1 O7 P1	1	1	2	66.7	A	0.0187	0.0176	0.0169	0.018	0.0212	0.0208	0.0208	0.0205	0.0241	0.0119	0.0058	0.0093	0.0129	0.0182	0.0157	0.0223	0.0228	0.021	0.0217	0.0232	0.019
LPE(20:1)	LPE	monoacyl	179	[M+H]	LPE(20:1)	(20:1)	(20:1)	507.332	7.058	C25 H50 N1 O7 P1	2	1	2	100	A	0.0238	0.0255	0.0236	0.0226	0.0199	0.0205	0.0247	0.0239	0.0257	0.0195	0.0222	0.0208	0.0286	0.0327	0.0286	0.0302	0.031	0.0271	0.0313	0.0276	0.0278
LPE(20:1)	LPE	monoacyl	180	[M+H]	LPE(20:1)	(20:1)	(20:1)	507.332	7.313	C25 H50 N1 O7 P1	2	1	2	100	A	0.0304	0.0356	0.0363	0.0269	0.0267	0.0254	0.0346	0.0311	0.0375	0.0238	0.0247	0.0301	0.0301	0.0347	0.0325	0.0307	0.0346	0.0427	0.0404	0.0375	0.0544
LPE(20:0)	LPE	monoacyl	202	[M+H]	LPE(20:0)	(20:0)	(20:0)	509.348	8.658	C25 H52 N1 O7 P1	1	1	2	66.7	C	0.0115	0.014	0.0116	0.0088	0.0074	0.0076	0.0103	0.009	0.0117	0.0092	0.0079	0.0113	0.0086	0.0158	0.0138	0.0088	0.0096	0.0126	0.0128	0.0104	0.0103
LPE(22:6)	LPE	monoacyl	183	[M+H]	LPE(22:6)	(22:6)	(22:6)	525.286	5.039	C27 H44 N1 O7 P1	2	1	2	100	A	3.4121	3.7878	3.3874	2.8368	3.0473	2.9686	3.6786	3.6295	4.1323	3.0686	3.1646	3.1586	3.9481	4.1725	3.8502	3.6738	4.2656	4.1392	4.1668	4.0053	4.1567
LPE(22:5)	LPE	monoacyl	192	[M+H]	LPE(22:5)	(22:5)	(22:5)	527.301	5.347	C27 H46 N1 O7 P1	2	1	4	100	A	0.3233	0.3367	0.3346	0.2944	0.3092	0.2815	0.3504	0.3175	0.4035	0.2905	0.3018	0.2879	0.3851	0.4256	0.4135	0.3459	0.3976	0.3807	0.3958	0.4132	0.3744
LPE(22:5)	LPE	monoacyl	194	[M+H]	LPE(22:5)	(22:5)	(22:5)	527.301	5.631	C27 H46 N1 O7 P1	2	1	4	100	A	0.1661	0.1886	0.1717	0.1506	0.1327	0.1291	0.1689	0.1732	0.1969	0.1837	0.1697	0.1579	0.2099	0.2911	0.2251	0.181	0.2116	0.1857	0.2079	0.1918	0.2038
LPE(22:4)	LPE	monoacyl	200	[M+H]	LPE(22:4)	(22:4)	(22:4)	529.317	5.934	C27 H48 N1 O7 P1	1	1	2	100	A	0.088	0.1034	0.088	0.0813	0.0786	0.0776	0.1007	0.0977	0.1083	0.0771	0.0852	0.0805	0.104	0.1185	0.1129	0.0998	0.1121	0.0883	0.0957	0.1153	0.1171
MG(10:0)	MG	monoacyl	977	[M+NH4]	MG(10:0)	(10:0)	(10:0)	246.183	3.772	C13 H26 O4	1	1	0	100	B	0.0026	0.0033	0.0035	0.0044	0.0066	0.0048	0.003	0.0028	0.0024	0.018	0.0165	0.0138	0.0099	0.0122	0.0094	0.0035	0.0038	0.0035	0.0098	0.0064	0.0074
MG(P-13:1)	MG	monoalkenyl	992	[M+NH4]	MG(P-13:1)	(P-13:1)	(P-13:1)	270.219	5.163	C16 H30 O3	2	1	0	100	A	0.0227	0.0275	0.0249	0.0242	0.0224	0.0232	0.0271	0.0264	0.0377	0.02	0.0184	0.0161	0.0209	0.0231	0.025	0.0251	0.0273	0.0269	0.0249	0.0261	0.0266
MG(P-13:1)	MG	monoalkenyl	995	[M+NH4]	MG(P-13:1)	(P-13:1)	(P-13:1)	270.219	5.392	C16 H30 O3	1	1	0	100	C	0.0206	0.0255	0.0207	0.0181	0.0187	0.0208	0.0227	0.0222	0.0199	0.0163	0.0175	0.0161	0.0278	0.0282	0.025	0.0121	0.0152	0.0171	0.0245	0.0184	0.0246
MG(O-13:1)	MG	monoalkyl	1093	[M+NH4]	MG(O-13:1)	(O-13:1)	(O-13:1)	272.235	5.094	C16 H32 O3	1	1	0	66.7	C	0.0095	0.0099	0.0106	0.0105	0.014	0.0065	0.0109	0.0157	0.0077	0.0108	0.0051	0.0059	0.0023	0.01	0.0056	0.0101	0.0049	0.0072	0.0095	0.0083	0.0142
MG(O-13:1)	MG	monoalkyl	1094	[M+NH4]	MG(O-13:1)	(O-13:1)	(O-13:1)	272.235	5.333	C16 H32 O3	1	1	0	100	C	0.0131	0.0169	0.0165	0.0155	0.0114	0.0116	0.0115	0.0113	0.012	0.0117	0.013	0.0134	0.0157	0.0089	0.0162	0.0141	0.0123	0.0117	0.0174	0.0137	0.0136
MG(12:0)	MG	monoacyl	1073	[M+NH4]	MG(12:0)	(12:0)	(12:0)	274.214	5.126	C15 H30 O4	2	1	1	100	A	0.2057	0.2146	0.1364	0.2008	0.2695	0.1916	0.2132	0.1476	0.1742	0.4558	0.4298	0.4548	0.4429	0.2792	0.3106	0.2723	0.2199	0.2351	0.3538	0.2878	0.3083
MG(13:0)	MG	monoacyl	1088	[M+NH4]	MG(13:0)	(13:0)	(13:0)	288.23	5.651	C16 H32 O4	2	1	0	66.7	A	0.0022	0.0046	0.0033	0.0039	0.004	0.0052	0.0045	0.0045	0.0048	0.0053	0.0061	0.0061	0.0113	0.012	0.0093	0.0035	0.0039	0.0045	0.0088	0.0066	0.0079
MG(P-15:2)	MG	monoalkenyl	1103	[M+NH4]	MG(P-15:2)	(P-15:2)	(P-15:2)	296.235	5.422	C18 H32 O3	2	1	0	100	C	0.0267	0.031	0.031	0.0283	0.0286	0.0309	0.0243	0.0239	0.0249	0.0184	0.0208	0.0238	0.0271	0.0285	0.0257	0.0193	0.0248	0.026	0.0254	0.0223	0.0339
MG(P-15:2)	MG	monoalkenyl	1106	[M+NH4]	MG(P-15:2)	(P-15:2)	(P-15:2)	296.235	5.585	C18 H32 O3	2	1	0	100	A	0.0334	0.0441	0.0436	0.0414	0.0396	0.0409	0.0434	0.0428	0.0487	0.0285	0.0328	0.0286	0.0466	0.0457	0.0424	0.0364	0.0358	0.0295	0.0346	0.047	0.0479
MG(O-15:2)	MG	monoalkyl	1130	[M+NH4]	MG(O-15:2)	(O-15:2)	(O-15:2)	298.251	6.137	C18 H34 O3	2	1	0	100	A	0.0576	0.0637	0.0761	0.0469	0.0477	0.054	0.0443	0.0439	0.0523	0.0569	0.0569	0.0576	0.0597	0.0672	0.0547	0.0371	0.0415	0.041	0.0583	0.0691	0.0709
MG(14:1)	MG	monoacyl	1137	[M+NH4]	MG(14:1)	(14:1)	(14:1)	300.23	5.259	C17 H32 O4	2	1	0	100	A	0.0126	0.0122	0.0135	0.0217	0.0208	0.0204	0.0162	0.0203	0.0181	0.0209	0.021	0.0191	0.0155	0.0159	0.0208	0.0185	0.017	0.0142	0.0196	0.0133	0.0134
MG(14:0)	MG	monoacyl	1168	[M+NH4]	MG(14:0)	(14:0)	(14:0)	302.246	6.036	C17 H34 O4	2	1	0	100	A	0.135	0.1585	0.0933	0.1931	0.2035	0.1757	0.1491	0.1259	0.1598	0.118	0.1992	0.1046	0.2217	0.2029	0.1677	0.1205	0.1452	0.1479	0.1922	0.1355	0.1507
MG(P-16:2)	MG	monoalkenyl	1270	[M+NH4]	MG(P-16:2)	(P-16:2)	(P-16:2)	310.251	6.477	C19 H34 O3	1	1	0	100	C	0.0026	0.0039	0.0029	0.0202	0.0275	0.0115	0.0003	0.0012	0.0028	0.0422	0.0365	0.0313	0.0099	0.0123	0.0141	0.0236	0.0477	0.0384	0.025	0.0243	0.028
MG(O-16:1)	MG	monoalkyl	1215	[M+NH4]	MG(O-16:1)	(O-16:1)	(O-16:1)	314.282	8.748	C19 H38 O3	2	1	0	100	A	0.0028	0.0063	0.0028	0.0407	0.0433	0.0319	0.0089	0.0088	0.0113	0.1699	0.187	0.1837	0.1708	0.1637	0.1639	0.026	0.0246	0.0213	0.074	0.0637	0.077
MG(15:0)	MG	monoacyl	1220	[M+NH4]	MG(15:0)	(15:0)	(15:0)	316.261	6.818	C18 H36 O4	2	1	0	100	A	0.3325	0.4446	0.3363	0.3176	0.3909	0.2821	0.2955	0.2985	0.3303	0.4467	0.4583	0.3737	0.3644	0.2461	0.2947	0.3056	0.2958	0.3113	0.5529	0.4511	0.4823
MG(O-17:2)	MG	monoalkyl	1261	[M+NH4]	MG(O-17:2)	(O-17:2)	(O-17:2)	326.282	6.806	C20 H38 O3	2	1	0	100	C	0.016	0.0254	0.0163	0.0152	0.0163	0.016	0.0156	0.0191	0.0195	0.0152	0.0144	0.0188	0.0155	0.0162	0.0143	0.0175	0.0145	0.0163	0.02	0.0176	0.0175
MG(16:1)	MG	monoacyl	1287	[M+NH4]	MG(16:1)	(16:1)	(16:1)	328.261	6.27	C19 H36 O4	2	1	0	66.7	A	1.9	2.5604	2.4375	2.9513	2.806	2.8679	2.386	2.3692	2.6814	2.0693	2.5037	2.4587	2.5204	2.0406	1.5725	1.7416	2.1674	2.5972	2.747	2.7887	2.9327
MG(16:1)	MG	monoacyl	1288	[M+NH4]	MG(16:1)	(16:1)	(16:1)	328.261	6.42	C19 H36 O4	1	1	0	100	B	0.3554	0.5168	0.4832	0.6617	0.9338	1.032	0.4303	0.3733	0.5024	0.1532	0.1645	0.1921	0.1348	0.1318	0.1053	0.3591	0.2225	0.3203	0.4195	0.4238	0.4768
MG(16:0)	MG	monoacyl	1380	[M+NH4]	MG(16:0)	(16:0)	(16:0)	330.277	7.297	C19 H38 O4	2	1	3	100	A	4.0751	5.1879	4.945	3.8697	5.5373	4.1057	4.7549	3.7493	4.1962	4.9066	4.6875	3.9227	3.8854	3.909	3.5085	3.2686	5.0701	3.5182	5.7736	3.4439	4.0042
MG(16:0)	MG	monoacyl	1383	[M+NH4]	MG(16:0)	(16:0)	(16:0)	330.277	7.838	C19 H38 O4	2	1	3	100	A	2.2901	2.848	3.3862	0.8263	2.8982	1.9009	2.2547	4.0112	2.1698	1.8804	3.1771	2.6132	2.9691	2.2424	1.7288	1.9354	2.6585	2.1857	3.4767	3.4685	2.9748
MG(17:1)	MG	monoacyl	1483	[M+NH4]	MG(17:1)	(17:1)	(17:1)	342.277	6.87	C20 H38 O4	2	1	0	100	A	0.0697	0.0813	0.0864	0.0914	0.0977	0.0751	0.0863	0.0698	0.0892	0.0804	0.0888	0.0851	0.0817	0.0908	0.076	0.0837	0.094	0.0903	0.0914	0.0793	0.1002
MG(17:1)	MG	monoacyl	1486	[M+NH4]	MG(17:1)	(17:1)	(17:1)	342.277	7.053	C20 H38 O4	1	1	0	100	B	0.0193	0.0277	0.0259	0.0291	0.0419	0.0394	0.0243	0.0224	0.03	0.013	0.0125	0.0143	0.0165	0.0174	0.0173	0.0164	0.0182	0.0179	0.0255	0.0222	0.0261
MG(O-18:1)	MG	monoalkyl	1507	[M+NH4]	MG(O-18:1)	(O-18:1)	(O-18:1)	342.313	10.638	C21 H42 O3	2	1	0	100	A	0.0043	0.0032	0.0035	0.052	0.0577	0.0458	0.0031	0.0043	0.0072	0.233	0.2194	0.2584	0.2375	0.1941	0.2107	0.0317	0.0336	0.03	0.0992	0.1147	0.1104
MG(17:0)	MG	monoacyl	1519	[M+NH4]	MG(17:0)	(17:0)	(17:0)	344.293	8.018	C20 H40 O4	2	1	1	100	A	0.0238	0.0454	0.0341	0.0309	0.0238	0.0313	0.0264	0.018	0.0276	0.0306	0.0353	0.0237	0.0349	0.0312	0.0245	0.0309	0.0267	0.0252	0.0226	0.0361	0.0393
MG(17:0)	MG	monoacyl	1521	[M+NH4]	MG(17:0)	(17:0)	(17:0)	344.293	8.33	C20 H40 O4	1	1	1	66.7	A	1.0806	1.1814	1.1383	1.3053	1.4829	0.9712	1.2179	1.1509	1.3062	1.2286	1.488	1.4188	1.3592	1.4237	1.1339	1.1106	1.018	1.2314	1.745	1.7278	1.9142
MG(P-19:4)	MG	monoalkenyl	1814	[M+NH4]	MG(P-19:4)	(P-19:4)	(P-19:4)	348.266	5.513	C22 H36 O3	1	1	0	100	C	1e-07	0.0006	0.0002	0.0018	0.0009	0.0006	0.1007	0.1028	0.1017	0.0053	0.005	0.0048	0.0041	0.0058	0.0041	0.0008	0.0008	0.0026	0.0274	0.0312	0.0378
MG(18:3)	MG	monoacyl	1557	[M+NH4]	MG(18:3)	(18:3)	(18:3)	352.261	5.924	C21 H36 O4	2	1	0	100	A	1.2903	1.5632	1.7007	1.9429	1.9766	1.8567	1.876	1.7955	1.971	2.0205	2.0279	1.8751	1.6862	1.6954	1.4977	1.4981	1.5036	1.5559	1.7855	1.8433	1.9443
MG(18:2)	MG	monoacyl	1676	[M+NH4]	MG(18:2)	(18:2)	(18:2)	354.277	6.767	C21 H38 O4	2	1	1	100	A	5.8365	6.2438	7.3224	10.2718	13.8969	14.7138	7.483	6.8362	8.1581	2.4378	2.3378	2.7638	2.1968	1.9681	1.9704	5.8967	4.3474	5.5054	7.2964	7.0754	8.3379
MG(18:1)	MG	monoacyl	1697	[M+NH4]	MG(18:1)	(18:1)	(18:1)	356.293	7.726	C21 H40 O4	2	1	3	66.7	A	3.675	5.1619	4.3469	7.5566	7.9147	9.6004	5.7241	4.7549	5.8198	2.1572	1.793	2.3265	1.5201	1.2745	1.2763	4.3207	2.913	3.305	4.2463	4.7233	4.8788
MG(18:1)	MG	monoacyl	1700	[M+NH4]	MG(18:1)	(18:1)	(18:1)	356.293	7.932	C21 H40 O4	2	1	3	66.7	A	2.6991	4.1615	4.2371	2.5747	4.1073	2.6762	3.6779	2.7366	3.6259	3.9872	4.274	4.4389	4.1031	3.9318	3.5319	3.1855	3.5699	3.5706	4.9429	4.8624	4.8544
MG(O-19:1)	MG	monoalkyl	1725	[M+NH4]	MG(O-19:1)	(O-19:1)	(O-19:1)	356.329	11.306	C22 H44 O3	2	1	0	100	C	0.0021	0.0023	0.0023	0.0176	0.0155	0.0175	0.003	0.0035	0.0042	0.0827	0.0722	0.0667	0.0853	0.0672	0.0609	0.0135	0.0167	0.011	0.0326	0.0328	0.0271
MG(18:0)	MG	monoacyl	1770	[M+NH4]	MG(18:0)	(18:0)	(18:0)	358.308	8.767	C21 H42 O4	2	1	1	100	A	7.5141	9.6814	7.3896	9.3898	9.6059	9.3759	8.6305	7.3789	7.2603	10.4952	10.9722	11.0593	9.5186	8.1446	8.313	7.1925	7.0932	7.0588	11.1127	8.7508	10.5264
MG(19:2)	MG	monoacyl	2040	[M+NH4]	MG(19:2)	(19:2)	(19:2)	368.293	6.595	C22 H40 O4	1	1	0	100	C	0.0487	0.0686	0.0589	0.0578	0.0623	0.0596	0.0481	0.0559	0.0559	0.047	0.0512	0.0549	0.0609	0.0487	0.0429	0.0527	0.0674	0.0636	0.0629	0.0564	0.0572
MG(19:2)	MG	monoacyl	2041	[M+NH4]	MG(19:2)	(19:2)	(19:2)	368.293	7.207	C22 H40 O4	1	1	0	100	B	0.0229	0.026	0.028	0.031	0.0348	0.0276	0.019	0.0263	0.0345	0.0324	0.0289	0.0306	0.0282	0.0291	0.0308	0.0221	0.0248	0.024	0.0288	0.0312	0.0291
MG(19:1)	MG	monoacyl	1838	[M+NH4]	MG(19:1)	(19:1)	(19:1)	370.308	8.244	C22 H42 O4	2	1	0	100	A	0.0734	0.0709	0.0826	0.0855	0.0788	0.0623	0.0944	0.0806	0.0999	0.064	0.0788	0.0714	0.0765	0.083	0.0693	0.0631	0.0692	0.0763	0.0823	0.0837	0.0863
MG(O-20:1)	MG	monoalkyl	2128	[M+NH4]	MG(O-20:1)	(O-20:1)	(O-20:1)	370.345	11.959	C23 H46 O3	1	1	0	66.7	C	0.0014	0.0015	0.0012	0.0455	0.0467	0.0454	0.002	0.0019	0.0017	0.0265	0.025	0.0246	0.0213	0.0187	0.0181	0.08	0.0992	0.0932	0.0359	0.0324	0.0403
MG(20:5)	MG	monoacyl	1858	[M+NH4]	MG(20:5)	(20:5)	(20:5)	376.261	5.857	C23 H36 O4	2	1	1	100	A	0.0981	0.1125	0.12	0.1135	0.1209	0.1182	0.1082	0.1106	0.1229	0.1137	0.1175	0.1084	0.1189	0.1273	0.1239	0.1171	0.1243	0.121	0.1333	0.1212	0.1325
MG(20:4)	MG	monoacyl	1870	[M+NH4]	MG(20:4)	(20:4)	(20:4)	378.277	6.491	C23 H38 O4	2	1	1	100	A	1.9885	2.3252	2.2587	2.1339	2.1318	2.135	1.9326	1.8519	2.3104	2.0178	1.9907	2.0693	2.4996	2.7028	2.4082	2.0203	2.3987	2.3335	2.4677	2.4751	2.7218
MG(20:4)	MG	monoacyl	1872	[M+NH4]	MG(20:4)	(20:4)	(20:4)	378.277	6.606	C23 H38 O4	2	1	1	100	B	0.4775	0.5352	0.5118	0.4958	0.6001	0.7652	0.4162	0.3472	0.4676	0.1395	0.1542	0.1836	0.1809	0.1766	0.1791	0.3698	0.26	0.2923	0.3846	0.4089	0.3999
MG(20:3)	MG	monoacyl	1882	[M+NH4]	MG(20:3)	(20:3)	(20:3)	380.293	6.829	C23 H40 O4	1	1	0	100	B	0.0141	0.0172	0.0187	0.0154	0.0142	0.0172	0.0142	0.0108	0.0192	0.0115	0.0127	0.0116	0.0161	0.0126	0.0132	0.0147	0.0157	0.0171	0.0214	0.0177	0.0221
MG(20:3)	MG	monoacyl	1889	[M+NH4]	MG(20:3)	(20:3)	(20:3)	380.293	6.992	C23 H40 O4	2	1	0	100	A	0.1754	0.1965	0.2141	0.2137	0.2139	0.2057	0.2068	0.2045	0.2312	0.1908	0.2145	0.1765	0.1828	0.2063	0.1902	0.1842	0.1772	0.2245	0.222	0.2139	0.2232
MG(20:3)	MG	monoacyl	1913	[M+NH4]	MG(20:3)	(20:3)	(20:3)	380.293	7.153	C23 H40 O4	2	1	0	66.7	A	0.0466	0.0663	0.0695	0.0757	0.08	0.0836	0.0552	0.0478	0.0645	0.0386	0.0351	0.0412	0.0442	0.0435	0.0377	0.0456	0.05	0.047	0.0538	0.0578	0.0696
MG(20:2)	MG	monoacyl	2023	[M+NH4]	MG(20:2)	(20:2)	(20:2)	382.308	7.827	C23 H42 O4	2	1	0	100	A	0.3179	0.446	0.3864	0.2898	0.3828	0.3067	0.3419	0.3028	0.4359	0.3108	0.3252	0.3781	0.3805	0.3571	0.4446	0.3174	0.425	0.3682	0.3932	0.4297	0.4325
MG(20:2)	MG	monoacyl	2025	[M+NH4]	MG(20:2)	(20:2)	(20:2)	382.308	8.014	C23 H42 O4	1	1	0	100	B	0.0345	0.0586	0.0572	0.0509	0.0566	0.0644	0.0498	0.0427	0.0571	0.0251	0.0313	0.0252	0.019	0.0214	0.0188	0.0332	0.0255	0.0325	0.0455	0.0438	0.0515
MG(20:1)	MG	monoacyl	2027	[M+NH4]	MG(20:1)	(20:1)	(20:1)	384.324	8.9	C23 H44 O4	2	1	0	100	A	0.1412	0.1516	0.1585	0.1317	0.1418	0.1287	0.1086	0.1361	0.1812	0.098	0.1068	0.1216	0.1617	0.1378	0.1169	0.1238	0.1452	0.1474	0.1617	0.1584	0.1788
MG(20:1)	MG	monoacyl	2028	[M+NH4]	MG(20:1)	(20:1)	(20:1)	384.324	9.145	C23 H44 O4	2	1	0	100	A	0.0527	0.0975	0.0844	0.0738	0.0904	0.1039	0.0888	0.0687	0.0931	0.0525	0.0552	0.0581	0.0553	0.0588	0.0494	0.0519	0.0501	0.0531	0.0712	0.0716	0.0835
MG(20:0)	MG	monoacyl	2051	[M+NH4]	MG(20:0)	(20:0)	(20:0)	386.34	10.828	C23 H46 O4	2	1	1	100	A	2.9132	4.4313	3.8376	3.0766	3.8219	3.189	2.8124	2.5966	3.0775	5.0178	5.3805	5.1231	3.985	4.3844	3.3831	3.1997	2.8217	3.528	5.0478	4.7428	5.7716
MG(21:0)	MG	monoacyl	2090	[M+NH4]	MG(21:0)	(21:0)	(21:0)	400.355	11.921	C24 H48 O4	1	1	0	100	B	0.0086	0.0148	0.0126	0.0094	0.0112	0.0088	0.0097	0.0086	0.0094	0.022	0.0207	0.0207	0.0127	0.0152	0.0133	0.0081	0.0081	0.011	0.0178	0.0144	0.0182
MG(22:6)	MG	monoacyl	2057	[M+NH4]	MG(22:6)	(22:6)	(22:6)	402.277	6.303	C25 H38 O4	2	1	1	100	A	1.4348	1.6877	1.7092	1.5228	1.5812	1.5396	1.3713	1.2878	1.4248	1.7455	1.6061	1.5296	1.6285	1.6183	1.4557	1.4584	1.4696	1.2844	1.5465	1.6161	1.536
MG(22:5)	MG	monoacyl	2073	[M+NH4]	MG(22:5)	(22:5)	(22:5)	404.293	6.662	C25 H40 O4	2	1	1	100	A	0.2373	0.3097	0.3231	0.3689	0.4036	0.3856	0.3579	0.3253	0.4068	0.2882	0.3374	0.36	0.3513	0.3366	0.305	0.2634	0.3142	0.3338	0.3019	0.3214	0.3807
MG(22:5)	MG	monoacyl	2074	[M+NH4]	MG(22:5)	(22:5)	(22:5)	404.293	6.807	C25 H40 O4	1	1	1	100	C	0.0491	0.0669	0.0562	0.0849	0.0998	0.0993	0.058	0.0546	0.0786	0.0288	0.0281	0.0296	0.0219	0.0248	0.0217	0.0529	0.0318	0.0409	0.0558	0.0576	0.0535
MG(22:5)	MG	monoacyl	2075	[M+NH4]	MG(22:5)	(22:5)	(22:5)	404.293	7.144	C25 H40 O4	1	1	1	66.7	C	0.025	0.0311	0.0297	0.0323	0.0406	0.0416	0.0281	0.025	0.0315	0.0221	0.017	0.0219	0.0212	0.0162	0.0099	0.0224	0.0219	0.0227	0.0324	0.0327	0.0349
MG(22:4)	MG	monoacyl	2079	[M+NH4]	MG(22:4)	(22:4)	(22:4)	406.308	7.422	C25 H42 O4	2	1	0	100	A	0.1044	0.1472	0.1332	0.1492	0.1434	0.1497	0.1528	0.1325	0.1904	0.1445	0.1107	0.1501	0.1409	0.132	0.1345	0.1253	0.1351	0.1503	0.1469	0.1824	0.1791
MG(24:6)	MG	monoacyl	2112	[M+NH4]	MG(24:6)	(24:6)	(24:6)	430.308	7.102	C27 H42 O4	1	1	0	100	C	0.0113	0.0149	0.0146	0.013	0.0125	0.0111	0.013	0.0118	0.013	0.0106	0.0126	0.014	0.0137	0.0135	0.0135	0.0107	0.0127	0.0129	0.012	0.0141	0.0164
MG(O-26:6)	MG	monoalkyl	2106	[M+H]	MG(O-26:6)	(O-26:6)	(O-26:6)	444.36	3.48	C29 H48 O3	1	1	0	66.7	C	0.0101	0.0137	0.0126	0.0121	0.016	0.0185	0.0168	0.0133	0.0176	0.0292	0.0249	0.0212	0.0234	0.0234	0.0191	0.0056	0.0061	0.0066	0.0157	0.0202	0.0189
PC(P-6:0_18:2)	PC	alkenyl-acyl	2610	[M+H]	PC(P-24:2)	(P-6:0_18:2)	(P-24:2)	601.411	19.689	C32 H60 N1 O7 P1	1	1	0	100	C	0.0002	1e-07	0.0002	0.0024	0.0035	0.0019	0.0005	0.0005	0.0005	0.0316	0.0296	0.0254	0.0146	0.024	0.0207	0.0013	0.0026	0.0016	0.0112	0.0101	0.011
PC(14:0_16:0)	PC	diacyl	855	[M+H]	PC(30:0)	(14:0_16:0)	(30:0)	705.531	14.459	C38 H76 N1 O8 P1	3	2	12	100	A	0.24	0.2737	0.2649	0.2382	0.2372	0.2409	0.2602	0.2679	0.2843	0.2445	0.2391	0.2348	0.2395	0.2429	0.2439	0.2342	0.2423	0.2475	0.2711	0.2774	0.2778
PC(31:3)	PC	diacyl	2627	[M+H]	PC(31:3)	(31:3)	(31:3)	713.5	14.467	C39 H72 N1 O8 P1	1	2	6	100	C	0.0155	0.0154	0.0158	0.0121	0.0142	0.0132	0.0163	0.0149	0.0168	0.0143	0.013	0.0126	0.013	0.0142	0.0121	0.0167	0.0151	0.0144	0.0145	0.0168	0.0164
PC(O-32:3)	PC	alkyl-acyl	2690	[M+H]	PC(O-32:3)	(O-32:3)	(O-32:3)	713.536	14.142	C40 H76 N1 O7 P1	1	1	0	100	C	0.0063	0.0065	0.0065	0.0067	0.0058	0.0067	0.0071	0.0074	0.0077	0.006	0.0061	0.0061	0.0062	0.0061	0.0063	0.006	0.0066	0.0056	0.0066	0.0075	0.0069
PC(31:1)	PC	diacyl	2933	[M+H]	PC(31:1)	(31:1)	(31:1)	717.531	13.606	C39 H76 N1 O8 P1	1	1	13	66.7	C	0.0025	0.0039	0.0038	0.0039	0.0039	0.0047	0.0047	0.0039	0.0053	0.0035	0.0043	0.0045	0.0046	0.0042	0.0046	0.0051	0.0051	0.0049	0.0047	0.0051	0.0052
PC(O-16:1_16:0)	PC	alkyl-acyl	865	[M+H]	PC(O-32:1)	(O-16:1_16:0)	(O-32:1)	717.567	18.508	C40 H80 N1 O7 P1	2	2	0	100	A	0.1506	0.1775	0.1655	0.1385	0.1452	0.1465	0.1475	0.156	0.1609	0.1278	0.119	0.1405	0.1181	0.1327	0.1212	0.1334	0.1664	0.1554	0.1665	0.1668	0.164
PC(P-11:0_22:6)	PC	alkenyl-acyl	2692	[M+H]	PC(P-33:6)	(P-11:0_22:6)	(P-33:6)	719.489	13.931	C41 H70 N1 O7 P1	1	1	0	100	B	0.0068	0.0069	0.0072	0.0074	0.0066	0.0075	0.0074	0.0081	0.0074	0.007	0.007	0.0067	0.0061	0.0065	0.0063	0.0068	0.008	0.0064	0.0087	0.0079	0.0071
PC(15:0_16:0)	PC	diacyl	949	[M+H]	PC(31:0)	(15:0_16:0)	(31:0)	719.547	15.676	C39 H78 N1 O8 P1	2	2	13	100	A	0.1371	0.1544	0.1476	0.1384	0.1266	0.1428	0.1546	0.1497	0.1586	0.138	0.1355	0.1373	0.1334	0.1329	0.1347	0.1343	0.1507	0.1456	0.1558	0.1696	0.1506
PC(O-32:0)	PC	alkyl-acyl	953	[M+H]	PC(O-32:0)	(O-32:0)	(O-32:0)	719.583	18.928	C40 H82 N1 O7 P1	2	2	0	100	B	0.0966	0.1432	0.0984	0.0775	0.0775	0.0775	0.0833	0.0888	0.0907	0.0799	0.0768	0.0718	0.0732	0.0693	0.0672	0.0717	0.0798	0.0776	0.0975	0.0931	0.0996
PC(14:0_18:2)	PC	diacyl	1503	[M+H]	PC(32:2)	(14:0_18:2)	(32:2)	729.531	13.044	C40 H76 N1 O8 P1	3	2	13	100	A	0.181	0.184	0.2066	0.1792	0.1862	0.1897	0.1871	0.2032	0.2212	0.1593	0.1615	0.1669	0.1336	0.1319	0.1299	0.1659	0.1956	0.1886	0.1828	0.192	0.1867
PC(16:0_16:1)	PC	diacyl	1530	[M+H]	PC(32:1)	(16:0_16:1)	(32:1)	731.547	14.837	C40 H78 N1 O8 P1	3	2	16	100	A	0.8675	1.0056	1.0515	0.9681	0.9321	0.9958	1.0242	1.0032	1.1134	0.9258	0.9199	0.9302	0.9495	1.016	0.9497	0.9456	0.8921	1.006	1.0751	1.1541	1.0968
PC(16:0_16:1)	PC	diacyl	1532	[M+H]	PC(32:1)	(16:0_16:1)	(32:1)	731.547	15.191	C40 H78 N1 O8 P1	2	2	16	100	A	0.1056	0.106	0.1079	0.0983	0.1119	0.0985	0.1202	0.1153	0.1261	0.1077	0.084	0.1044	0.084	0.0739	0.0702	0.085	0.1169	0.1239	0.1145	0.1295	0.1062
PC(O-12:1_22:6)	PC	alkyl-acyl	2700	[M+H]	PC(O-34:7)	(O-12:1_22:6)	(O-34:7)	733.505	15.171	C42 H72 N1 O7 P1	1	1	0	100	C	0.0032	0.0028	0.0036	0.0028	0.0034	0.0046	0.0037	0.0028	0.0036	0.0034	0.003	0.0036	0.0035	0.0028	0.0026	0.0026	0.0041	0.0032	0.0049	0.0037	0.0045
PC(16:0_16:0)	PC	diacyl	647	[M+H]	PC(32:0)	(16:0_16:0)	(32:0)	733.562	17.002	C40 H80 N1 O8 P1	4	2	14	100	A	6.6457	7.6522	7.2619	6.5199	6.639	6.9261	7.1951	7.5451	7.1925	6.6539	6.6006	6.5101	6.7804	6.9433	6.9769	6.3704	7.162	6.9975	7.4745	7.8861	7.4664
PC(O-18:4_16:1)	PC	alkyl-acyl	1538	[M+H]	PC(O-34:5)	(O-18:4_16:1)	(O-34:5)	737.536	13.768	C42 H76 N1 O7 P1	2	2	0	100	B	0.0257	0.0271	0.0274	0.0295	0.0299	0.0315	0.0318	0.0329	0.0354	0.0294	0.0297	0.0309	0.0299	0.0301	0.0291	0.0295	0.0314	0.0304	0.0333	0.0339	0.0336
PC(33:3)	PC	diacyl	2713	[M+H]	PC(33:3)	(33:3)	(33:3)	741.531	16.851	C41 H76 N1 O8 P1	1	2	10	100	C	0.031	0.0368	0.0354	0.0292	0.0292	0.0376	0.0241	0.0343	0.0344	0.0369	0.032	0.0277	0.0351	0.0311	0.0239	0.0328	0.0338	0.0276	0.0281	0.0356	0.0334
PC(O-16:1_18:2)	PC	alkyl-acyl	1543	[M+H]	PC(O-34:3)	(O-16:1_18:2)	(O-34:3)	741.567	16.718	C42 H80 N1 O7 P1	3	3	0	100	A	0.3572	0.3932	0.4188	0.3792	0.3587	0.3873	0.4039	0.4141	0.4102	0.3613	0.3567	0.3712	0.3778	0.3872	0.3634	0.3594	0.3998	0.3976	0.4226	0.4489	0.4344
PC(17:2_16:0)	PC	diacyl	1577	[M+H]	PC(33:2)	(17:2_16:0)	(33:2)	743.547	15.838	C41 H78 N1 O8 P1	1	6	12	100	C	0.0209	0.0212	0.0222	0.0209	0.0212	0.0204	0.0198	0.0223	0.0245	0.0197	0.02	0.0204	0.0195	0.0211	0.0179	0.0198	0.022	0.0219	0.0213	0.0263	0.0251
PC(O-34:2)	PC	alkyl-acyl	1582	[M+H]	PC(O-34:2)	(O-34:2)	(O-34:2)	743.583	17.113	C42 H82 N1 O7 P1	1	3	0	66.7	C	0.0219	0.0316	0.0263	0.0218	0.0214	0.0244	0.024	0.0243	0.0239	0.0241	0.0233	0.0214	0.0229	0.0219	0.0215	0.0207	0.0235	0.0222	0.0267	0.0297	0.0253
PC(O-16:1_18:1)	PC	alkyl-acyl	1584	[M+H]	PC(O-34:2)	(O-16:1_18:1)	(O-34:2)	743.583	18.77	C42 H82 N1 O7 P1	2	3	0	100	A	0.0582	0.0671	0.0645	0.0614	0.0547	0.0615	0.0634	0.0643	0.0724	0.0594	0.0578	0.0587	0.056	0.058	0.0528	0.0543	0.0621	0.0541	0.0652	0.0712	0.0714
PC(P-15:2_20:5)	PC	alkenyl-acyl	2719	[M+H]	PC(P-35:7)	(P-15:2_20:5)	(P-35:7)	745.505	13.822	C43 H72 N1 O7 P1	1	2	0	100	B	0.0408	0.0437	0.0463	0.0416	0.0425	0.0435	0.0447	0.044	0.0522	0.044	0.045	0.0432	0.0439	0.0436	0.0445	0.0432	0.0463	0.0447	0.0503	0.048	0.0501
PC(O-35:8)	PC	alkyl-acyl	2722	[M+H]	PC(O-35:8)	(O-35:8)	(O-35:8)	745.505	17.107	C43 H72 N1 O7 P1	1	1	0	100	C	0.0131	0.0151	0.012	0.011	0.0123	0.0116	0.0135	0.0157	0.0144	0.0136	0.013	0.0133	0.015	0.0132	0.0141	0.0179	0.017	0.015	0.0132	0.015	0.0128
PC(33:1)	PC	diacyl	1600	[M+H]	PC(33:1)	(33:1)	(33:1)	745.562	16.043	C41 H80 N1 O8 P1	1	2	15	100	C	0.1646	0.1765	0.1836	0.1644	0.1592	0.1677	0.1722	0.1771	0.1887	0.1682	0.1721	0.1658	0.167	0.1777	0.1786	0.1606	0.1828	0.1797	0.1951	0.1902	0.1912
PC(O-34:1)	PC	alkyl-acyl	1606	[M+H]	PC(O-34:1)	(O-34:1)	(O-34:1)	745.599	19.152	C42 H84 N1 O7 P1	2	2	0	100	B	0.1031	0.1309	0.1149	0.0968	0.0867	0.0993	0.1026	0.107	0.1129	0.067	0.0688	0.0669	0.0629	0.0635	0.0605	0.0938	0.102	0.0966	0.0881	0.1118	0.0869
PC(33:0)	PC	diacyl	2736	[M+H]	PC(33:0)	(33:0)	(33:0)	747.578	17.62	C41 H82 N1 O8 P1	1	2	13	100	C	0.0052	0.0061	0.0072	0.0066	0.006	0.0066	0.0064	0.0053	0.0103	0.0057	0.0064	0.0052	0.0066	0.0063	0.0042	0.0049	0.0068	0.0057	0.0052	0.0069	0.0059
PC(33:0)	PC	diacyl	2737	[M+H]	PC(33:0)	(33:0)	(33:0)	747.578	17.941	C41 H82 N1 O8 P1	1	2	13	100	C	0.0159	0.0183	0.0175	0.0159	0.0165	0.0161	0.0194	0.0149	0.017	0.0142	0.0149	0.0161	0.0154	0.0134	0.019	0.0151	0.0161	0.0159	0.017	0.0176	0.0152
PC(16:0_17:0)	PC	diacyl	2738	[M+H]	PC(33:0)	(16:0_17:0)	(33:0)	747.578	18.497	C41 H82 N1 O8 P1	2	2	13	100	A	0.113	0.1238	0.1206	0.1066	0.1136	0.1133	0.1118	0.1218	0.1213	0.0942	0.0842	0.1003	0.0867	0.095	0.0896	0.0998	0.123	0.115	0.1179	0.1168	0.1236
PC(O-34:0)	PC	alkyl-acyl	2740	[M+H]	PC(O-34:0)	(O-34:0)	(O-34:0)	747.614	20.588	C42 H86 N1 O7 P1	1	1	0	100	C	0.0145	0.0201	0.0155	0.0114	0.0123	0.0129	0.0129	0.0125	0.0142	0.0121	0.0118	0.0107	0.0106	0.011	0.0112	0.0118	0.013	0.0127	0.0141	0.016	0.0149
PC(O-13:1_22:5)	PC	alkyl-acyl	2742	[M+H]	PC(O-35:6)	(O-13:1_22:5)	(O-35:6)	749.536	16.901	C43 H76 N1 O7 P1	1	1	0	66.7	C	0.0316	0.0326	0.0316	0.032	0.032	0.0337	0.0304	0.0394	0.0395	0.0319	0.0304	0.0294	0.0326	0.0318	0.0284	0.0318	0.0357	0.0338	0.0391	0.0412	0.0344
PC(34:5)	PC	diacyl	2744	[M+H]	PC(34:5)	(34:5)	(34:5)	751.515	11.452	C42 H74 N1 O8 P1	1	1	6	100	C	0.0051	0.0053	0.0052	0.0046	0.0047	0.0051	0.006	0.0061	0.0064	0.004	0.0045	0.0045	0.0049	0.0045	0.005	0.0045	0.0044	0.0048	0.0057	0.005	0.0055
PC(O-15:2_20:3)	PC	alkyl-acyl	2751	[M+H]	PC(O-35:5)	(O-15:2_20:3)	(O-35:5)	751.552	18.803	C43 H78 N1 O7 P1	1	4	0	66.7	B	0.0057	0.0051	0.0097	0.0075	0.007	0.0083	0.0081	0.0124	0.0094	0.0091	0.0099	0.0097	0.0098	0.0088	0.0086	0.0088	0.0115	0.0105	0.0119	0.0121	0.0096
PC(34:4)	PC	diacyl	1779	[M+H]	PC(34:4)	(34:4)	(34:4)	753.531	11.959	C42 H76 N1 O8 P1	1	2	22	100	C	0.0072	0.0079	0.0083	0.0081	0.0072	0.0081	0.0091	0.0081	0.0094	0.0072	0.0069	0.0076	0.0078	0.0081	0.0072	0.0072	0.0076	0.0078	0.0094	0.0081	0.0078
PC(34:4)	PC	diacyl	1780	[M+H]	PC(34:4)	(34:4)	(34:4)	753.531	12.242	C42 H76 N1 O8 P1	1	2	22	100	C	0.0023	0.0029	0.0026	0.0031	0.0035	0.0025	0.0039	0.0032	0.0037	0.0032	0.0035	0.0028	0.0024	0.0027	0.0028	0.0029	0.003	0.0018	0.0036	0.0039	0.0046
PC(14:0_20:4)	PC	diacyl	1781	[M+H]	PC(34:4)	(14:0_20:4)	(34:4)	753.531	12.767	C42 H76 N1 O8 P1	2	2	22	100	A	0.0688	0.0753	0.0792	0.0723	0.0706	0.0684	0.0762	0.0743	0.0821	0.0685	0.0687	0.066	0.0725	0.0744	0.0731	0.0674	0.0762	0.0713	0.082	0.0799	0.0803
PC(16:1_18:2)	PC	diacyl	1800	[M+H]	PC(34:3)	(16:1_18:2)	(34:3)	755.547	13.362	C42 H78 N1 O8 P1	3	3	14	100	A	0.6549	0.6471	0.7007	0.6301	0.5845	0.6376	0.6367	0.6611	0.8043	0.6267	0.5969	0.6102	0.5887	0.6264	0.6631	0.5587	0.7204	0.6396	0.774	0.7398	0.7158
PC(16:0_18:3)	PC	diacyl	1802	[M+H]	PC(34:3)	(16:0_18:3)	(34:3)	755.547	13.81	C42 H78 N1 O8 P1	3	3	14	100	A	0.48	0.535	0.5315	0.5669	0.5519	0.5481	0.5638	0.6011	0.6206	0.5785	0.5588	0.527	0.5474	0.5247	0.5142	0.5182	0.5906	0.5511	0.6005	0.6337	0.6142
PC(16:0_18:3)	PC	diacyl	1804	[M+H]	PC(34:3)	(16:0_18:3)	(34:3)	755.547	14.189	C42 H78 N1 O8 P1	3	3	14	100	A	0.8629	0.9379	0.9386	0.8498	0.8412	0.8558	0.9056	0.9387	0.9991	0.8833	0.8781	0.8644	0.8622	0.9053	0.857	0.9022	0.9455	0.8164	0.9989	1.0756	0.958
PC(16:0_18:2)	PC	diacyl	757	[M+H]	PC(34:2)	(16:0_18:2)	(34:2)	757.562	15.393	C42 H80 N1 O8 P1	4	4	30	100	A	30.5525	34.0971	33.8431	30.8779	31.1317	32.495	33.3333	35.1012	35.4025	31.1277	31.7785	32.3304	32.9999	33.0645	31.9764	35.4279	37.1309	35.1106	35.3568	37.837	33.7354
PC(16:0_18:1)	PC	diacyl	1842	[M+H]	PC(34:1)	(16:0_18:1)	(34:1)	759.578	17.211	C42 H82 N1 O8 P1	3	3	22	100	A	15.3892	16.5871	16.76	15.8442	15.3662	15.9396	17.2095	17.3215	16.7172	15.5754	14.985	15.3418	15.6478	16.1554	15.6288	15.5812	17.4843	16.602	17.3216	18.5517	17.7034
PC(20:5_15:2)	PC	diacyl	2756	[M+H]	PC(35:7)	(20:5_15:2)	(35:7)	761.5	12.742	C43 H72 N1 O8 P1	1	2	0	100	B	0.0091	0.0097	0.0104	0.0102	0.01	0.0107	0.0118	0.0107	0.0116	0.0104	0.0104	0.0091	0.0104	0.0106	0.0102	0.0091	0.0105	0.0108	0.0113	0.0131	0.0112
PC(O-20:6_16:1)	PC	alkyl-acyl	2760	[M+H]	PC(O-36:7)	(O-20:6_16:1)	(O-36:7)	761.536	13.245	C44 H76 N1 O7 P1	1	2	0	66.7	C	0.0043	0.0038	0.0045	0.0036	0.004	0.0043	0.0042	0.0047	0.0052	0.0035	0.0034	0.0036	0.0039	0.004	0.0033	0.004	0.0045	0.0045	0.0048	0.0048	0.0045
PC(O-14:1_22:6)	PC	alkyl-acyl	2761	[M+H]	PC(O-36:7)	(O-14:1_22:6)	(O-36:7)	761.536	17.744	C44 H76 N1 O7 P1	1	2	0	100	C	0.0133	0.0142	0.0132	0.0123	0.0134	0.0128	0.0137	0.016	0.0158	0.0116	0.0121	0.0124	0.0145	0.0117	0.0132	0.0124	0.0127	0.0138	0.0128	0.0146	0.015
PC(16:0_18:0)	PC	diacyl	1859	[M+H]	PC(34:0)	(16:0_18:0)	(34:0)	761.593	19.658	C42 H84 N1 O8 P1	2	2	13	100	A	1.1625	1.2744	1.3384	1.1747	1.1296	1.1587	1.3207	1.248	1.3206	1.1297	1.1073	1.0327	1.0824	1.0907	1.102	1.1476	1.2626	1.236	1.31	1.3751	1.3091
PC(O-18:4_18:2)	PC	alkyl-acyl	1874	[M+H]	PC(O-36:6)	(O-18:4_18:2)	(O-36:6)	763.552	13.464	C44 H78 N1 O7 P1	1	4	0	66.7	B	0.0027	0.0024	0.0036	0.0036	0.0036	0.0031	0.0035	0.0032	0.0049	0.0024	0.003	0.0032	0.003	0.003	0.0033	0.0031	0.0034	0.0035	0.0035	0.0032	0.0041
PC(O-18:4_18:2)	PC	alkyl-acyl	1875	[M+H]	PC(O-36:6)	(O-18:4_18:2)	(O-36:6)	763.552	14.118	C44 H78 N1 O7 P1	1	4	0	100	C	0.0194	0.0201	0.022	0.0183	0.0186	0.0195	0.0209	0.0205	0.0239	0.0172	0.0184	0.017	0.0186	0.0195	0.0181	0.0176	0.017	0.0171	0.0215	0.0254	0.0199
PC(O-16:1_20:5)	PC	alkyl-acyl	1878	[M+H]	PC(O-36:6)	(O-16:1_20:5)	(O-36:6)	763.552	14.655	C44 H78 N1 O7 P1	3	4	0	100	A	0.1962	0.2123	0.2192	0.1995	0.1952	0.2109	0.223	0.2183	0.2308	0.1978	0.1974	0.2059	0.2117	0.2153	0.213	0.2164	0.2118	0.2159	0.2302	0.2061	0.2382
PC(O-14:1_22:5)	PC	alkyl-acyl	1881	[M+H]	PC(O-36:6)	(O-14:1_22:5)	(O-36:6)	763.552	18.67	C44 H78 N1 O7 P1	1	4	0	100	B	0.0078	0.0086	0.0089	0.0082	0.0068	0.0073	0.0081	0.0087	0.0085	0.0072	0.0071	0.0071	0.0068	0.0066	0.0071	0.0067	0.0091	0.0084	0.0095	0.009	0.0093
PC(15:0_20:5)	PC	diacyl	2012	[M+H]	PC(35:5)	(15:0_20:5)	(35:5)	765.531	12.479	C43 H76 N1 O8 P1	2	3	10	100	A	0.0102	0.0112	0.0125	0.01	0.0107	0.0112	0.01	0.0107	0.0103	0.01	0.0093	0.0104	0.01	0.0102	0.009	0.0105	0.0114	0.0108	0.0109	0.0111	0.0112
PC(35:5)	PC	diacyl	2013	[M+H]	PC(35:5)	(35:5)	(35:5)	765.531	13.594	C43 H76 N1 O8 P1	1	3	10	66.7	C	0.0048	0.0069	0.0058	0.0064	0.0056	0.0054	0.0059	0.0056	0.0091	0.0064	0.0063	0.0052	0.006	0.0066	0.007	0.0047	0.0066	0.0053	0.0058	0.0061	0.0067
PC(O-16:1_20:4)	PC	alkyl-acyl	2027	[M+H]	PC(O-36:5)	(O-16:1_20:4)	(O-36:5)	765.567	16.275	C44 H80 N1 O7 P1	3	5	0	100	A	2.2008	2.3687	2.5073	2.1562	2.2484	2.241	2.4692	2.4228	2.5334	2.3031	2.2171	2.2427	2.2423	2.2703	2.1914	2.1649	2.455	2.3589	2.583	2.6439	2.547
PC(15:0_20:4)	PC	diacyl	2046	[M+H]	PC(35:4)	(15:0_20:4)	(35:4)	767.547	13.859	C43 H78 N1 O8 P1	2	4	15	100	A	0.1154	0.1283	0.1286	0.1215	0.1199	0.1235	0.1282	0.137	0.1498	0.1087	0.1083	0.108	0.1197	0.1155	0.1175	0.1041	0.1183	0.1082	0.1278	0.1327	0.1323
PC(19:4_16:0)	PC	diacyl	2049	[M+H]	PC(35:4)	(19:4_16:0)	(35:4)	767.547	15.508	C43 H78 N1 O8 P1	1	4	15	66.7	C	0.0088	0.0124	0.0113	0.0097	0.0093	0.0103	0.0092	0.0115	0.0099	0.009	0.0082	0.0093	0.008	0.0102	0.007	0.0097	0.0114	0.0141	0.0102	0.0116	0.0104
PC(35:4)	PC	diacyl	2050	[M+H]	PC(35:4)	(35:4)	(35:4)	767.547	16.848	C43 H78 N1 O8 P1	1	4	15	100	C	0.0148	0.0151	0.0169	0.0134	0.0145	0.0175	0.0159	0.0149	0.0219	0.0173	0.0165	0.0166	0.0163	0.013	0.0135	0.0143	0.0175	0.0177	0.0174	0.018	0.0194
PC(19:4_16:0)	PC	diacyl	2052	[M+H]	PC(35:4)	(19:4_16:0)	(35:4)	767.547	17.634	C43 H78 N1 O8 P1	1	4	15	100	C	0.0234	0.0254	0.0253	0.0214	0.0207	0.0217	0.0272	0.0259	0.027	0.0243	0.0211	0.0199	0.0165	0.0166	0.0169	0.0156	0.018	0.0193	0.0188	0.0282	0.0191
PC(O-36:4)	PC	alkyl-acyl	2061	[M+H]	PC(O-36:4)	(O-36:4)	(O-36:4)	767.583	16.78	C44 H82 N1 O7 P1	1	5	0	100	C	0.1219	0.14	0.127	0.1093	0.1156	0.1169	0.1162	0.125	0.1272	0.1141	0.1164	0.1184	0.1161	0.114	0.1061	0.1054	0.1242	0.1172	0.1319	0.139	0.1296
PC(O-18:3_18:1)	PC	alkyl-acyl	2064	[M+H]	PC(O-36:4)	(O-18:3_18:1)	(O-36:4)	767.583	17.356	C44 H82 N1 O7 P1	1	5	0	100	C	0.0118	0.018	0.0185	0.0096	0.0131	0.014	0.0185	0.0165	0.0152	0.0151	0.0135	0.014	0.0123	0.0126	0.0118	0.0143	0.0149	0.0145	0.0145	0.0189	0.0157
PC(O-18:3_18:1)	PC	alkyl-acyl	2065	[M+H]	PC(O-36:4)	(O-18:3_18:1)	(O-36:4)	767.583	17.6	C44 H82 N1 O7 P1	1	5	0	100	C	0.0116	0.0144	0.0125	0.0129	0.0132	0.0152	0.0133	0.0153	0.013	0.0142	0.0135	0.0117	0.0089	0.0143	0.0131	0.012	0.0147	0.0159	0.0133	0.0154	0.0172
PC(17:1_18:2)	PC	diacyl	2073	[M+H]	PC(35:3)	(17:1_18:2)	(35:3)	769.562	14.485	C43 H80 N1 O8 P1	2	3	12	100	A	0.0977	0.1101	0.1164	0.1073	0.1013	0.1021	0.1162	0.116	0.118	0.1048	0.1037	0.1005	0.099	0.1085	0.1007	0.104	0.1055	0.1047	0.1186	0.1042	0.1152
PC(O-36:3)	PC	alkyl-acyl	2779	[M+H]	PC(O-36:3)	(O-36:3)	(O-36:3)	769.599	17.286	C44 H84 N1 O7 P1	1	3	0	100	C	0.0023	0.0033	0.0034	0.0032	0.0024	0.004	0.0032	0.0043	0.0031	0.0028	0.0029	0.0028	0.003	0.0018	0.0036	0.0039	0.005	0.0046	0.0041	0.0037	0.0038
PC(O-36:3)	PC	alkyl-acyl	2780	[M+H]	PC(O-36:3)	(O-36:3)	(O-36:3)	769.599	19.492	C44 H84 N1 O7 P1	1	3	0	100	C	0.0083	0.0081	0.0128	0.0109	0.0078	0.0102	0.0094	0.0082	0.0098	0.01	0.0099	0.0106	0.0096	0.0106	0.0094	0.009	0.0092	0.0115	0.0119	0.012	0.0109
PC(O-37:9)	PC	alkyl-acyl	2782	[M+H]	PC(O-37:9)	(O-37:9)	(O-37:9)	771.52	17.417	C45 H74 N1 O7 P1	1	1	0	100	C	0.008	0.012	0.0121	0.0118	0.0109	0.011	0.0105	0.0122	0.0118	0.0096	0.0097	0.0118	0.0117	0.0122	0.0097	0.0135	0.0132	0.0121	0.0108	0.0105	0.0113
PC(17:0_18:2)	PC	diacyl	2095	[M+H]	PC(35:2)	(17:0_18:2)	(35:2)	771.578	16.368	C43 H82 N1 O8 P1	2	3	14	100	A	0.2038	0.2183	0.2332	0.2119	0.2186	0.2221	0.2254	0.2446	0.2476	0.2052	0.2084	0.2129	0.2078	0.2176	0.2171	0.2202	0.2329	0.2112	0.248	0.25	0.2373
PC(17:2_18:0)	PC	diacyl	2096	[M+H]	PC(35:2)	(17:2_18:0)	(35:2)	771.578	18.539	C43 H82 N1 O8 P1	1	3	14	100	C	0.022	0.0216	0.022	0.0212	0.0231	0.0215	0.0222	0.023	0.023	0.0207	0.0162	0.0209	0.0181	0.0197	0.0218	0.0212	0.0232	0.0241	0.0225	0.0227	0.0238
PC(O-36:2)	PC	alkyl-acyl	2783	[M+H]	PC(O-36:2)	(O-36:2)	(O-36:2)	771.614	19.769	C44 H86 N1 O7 P1	1	1	0	66.7	C	0.0059	0.0117	0.007	0.0066	0.0065	0.0053	0.0062	0.0064	0.0066	0.0065	0.0065	0.0061	0.0054	0.0052	0.0053	0.0068	0.0059	0.0056	0.0054	0.0083	0.006
PC(O-15:2_22:6)	PC	alkyl-acyl	2786	[M+H]	PC(O-37:8)	(O-15:2_22:6)	(O-37:8)	773.536	16.752	C45 H76 N1 O7 P1	1	2	0	100	B	0.3351	0.3625	0.3752	0.3578	0.3382	0.3528	0.3777	0.3779	0.399	0.3486	0.3487	0.3533	0.3603	0.3566	0.3553	0.3628	0.3921	0.3865	0.3901	0.4249	0.4106
PC(O-37:8)	PC	alkyl-acyl	2789	[M+H]	PC(O-37:8)	(O-37:8)	(O-37:8)	773.536	19.655	C45 H76 N1 O7 P1	1	2	0	100	C	0.0128	0.0157	0.015	0.013	0.0136	0.013	0.0143	0.0158	0.015	0.014	0.0126	0.0136	0.0139	0.0142	0.0146	0.0173	0.0172	0.0163	0.0139	0.0176	0.0146
PC(17:0_18:1)	PC	diacyl	2110	[M+H]	PC(35:1)	(17:0_18:1)	(35:1)	773.593	18.799	C43 H84 N1 O8 P1	2	2	16	100	A	0.3021	0.2943	0.3388	0.2862	0.2619	0.2932	0.2836	0.3196	0.3471	0.2855	0.2864	0.2954	0.287	0.2893	0.2734	0.2564	0.3408	0.2841	0.3354	0.3333	0.3307
PC(O-15:1_22:6)	PC	alkyl-acyl	2792	[M+H]	PC(O-37:7)	(O-15:1_22:6)	(O-37:7)	775.552	17.096	C45 H78 N1 O7 P1	1	3	0	66.7	C	0.0063	0.0089	0.0085	0.0073	0.0084	0.008	0.0075	0.0061	0.009	0.0095	0.0084	0.0084	0.0088	0.008	0.0094	0.0067	0.0074	0.008	0.0092	0.0088	0.009
PC(16:1_20:5)	PC	diacyl	2114	[M+H]	PC(36:6)	(16:1_20:5)	(36:6)	777.531	11.745	C44 H76 N1 O8 P1	2	2	17	100	A	0.0211	0.0231	0.025	0.0275	0.0266	0.0276	0.0284	0.0279	0.0326	0.0275	0.0247	0.0258	0.0246	0.0259	0.0256	0.0231	0.0254	0.0261	0.0281	0.0315	0.0294
PC(36:6)	PC	diacyl	2115	[M+H]	PC(36:6)	(36:6)	(36:6)	777.531	12.29	C44 H76 N1 O8 P1	1	2	17	100	C	0.0103	0.0109	0.0117	0.0108	0.0104	0.0115	0.0106	0.0113	0.0096	0.0102	0.0103	0.0101	0.0093	0.01	0.0092	0.0093	0.0118	0.0089	0.0104	0.0131	0.0116
PC(18:2_18:3)	PC	diacyl	920	[M+H]	PC(36:5)	(18:2_18:3)	(36:5)	779.547	12.427	C44 H78 N1 O8 P1	3	6	21	100	A	0.1777	0.1773	0.2017	0.1862	0.1926	0.2047	0.1742	0.1619	0.1632	0.1797	0.1759	0.1957	0.1586	0.1678	0.1545	0.1695	0.1987	0.1838	0.1909	0.2191	0.1938
PC(16:1_20:4)	PC	diacyl	924	[M+H]	PC(36:5)	(16:1_20:4)	(36:5)	779.547	13.046	C44 H78 N1 O8 P1	3	6	21	100	A	0.2674	0.2582	0.3088	0.2575	0.2645	0.273	0.2677	0.3035	0.3251	0.2106	0.2337	0.2416	0.1684	0.1522	0.1481	0.2456	0.2805	0.2764	0.2368	0.255	0.2374
PC(16:0_20:5)	PC	diacyl	926	[M+H]	PC(36:5)	(16:0_20:5)	(36:5)	779.547	13.553	C44 H78 N1 O8 P1	4	6	21	100	A	4.8732	5.3039	5.5835	5.6108	5.6999	5.9227	6.1786	6.1192	6.8492	5.4169	5.7526	5.7271	5.8388	5.5068	5.6596	5.7214	6.0029	6.0013	5.9974	6.5731	6.389
PC(O-37:5)	PC	alkyl-acyl	2804	[M+H]	PC(O-37:5)	(O-37:5)	(O-37:5)	779.583	17.591	C45 H82 N1 O7 P1	1	1	0	100	C	0.0066	0.0064	0.0078	0.0066	0.0071	0.0074	0.0073	0.0056	0.0082	0.0051	0.0067	0.007	0.0051	0.006	0.0054	0.0056	0.0059	0.0074	0.0063	0.0074	0.0069
PC(18:2_18:2)	PC	diacyl	1069	[M+H]	PC(36:4)	(18:2_18:2)	(36:4)	781.562	13.768	C44 H80 N1 O8 P1	3	6	26	100	A	3.8503	4.2081	4.3199	3.9398	3.8418	3.9627	4.1712	4.4595	4.6962	3.6829	3.4461	3.5346	3.8081	3.8455	3.8034	3.4223	3.693	3.4084	4.2915	4.2782	4.1622
PC(16:0_20:4)	PC	diacyl	1080	[M+H]	PC(36:4)	(16:0_20:4)	(36:4)	781.562	14.9	C44 H80 N1 O8 P1	4	6	26	100	A	25.3616	28.6688	28.6345	26.3463	26.3655	28.1042	29.1678	30.2407	31.4055	25.8222	25.9878	26.5025	24.6907	25.077	24.6169	27.9931	29.5851	28.8238	29.8105	31.194	28.411
PC(18:1_18:2)	PC	diacyl	1256	[M+H]	PC(36:3)	(18:1_18:2)	(36:3)	783.578	15.706	C44 H82 N1 O8 P1	4	3	20	100	A	11.9801	13.3746	12.9931	12.2856	11.5904	12.874	13.1978	13.3037	13.7027	12.0824	12.227	12.3256	12.0966	12.6242	11.8614	12.4236	13.7495	13.2187	13.8527	15.0144	13.583
PC(16:0_20:3)	PC	diacyl	1257	[M+H]	PC(36:3)	(16:0_20:3)	(36:3)	783.578	16.165	C44 H82 N1 O8 P1	3	3	20	100	A	2.0904	2.4079	2.6856	2.3442	1.9149	2.2449	2.4632	2.3758	2.4915	2.2637	2.2177	2.1805	2.2146	2.1052	2.2545	1.9795	2.1813	2.4606	2.658	2.0052	2.4476
PC(16:0_20:2)	PC	diacyl	1458	[M+H]	PC(36:2)	(16:0_20:2)	(36:2)	785.593	17.721	C44 H84 N1 O8 P1	2	6	40	100	A	1.8839	2.1252	2.1875	1.9542	1.9857	2.0683	2.1379	2.2219	2.2504	1.9896	1.8219	1.9132	1.9442	1.9677	1.863	1.8468	2.0057	2.0079	2.0911	2.4057	2.1842
PC(18:0_18:2)	PC	diacyl	1460	[M+H]	PC(36:2)	(18:0_18:2)	(36:2)	785.593	18.136	C44 H84 N1 O8 P1	4	6	40	100	A	21.5685	23.3154	24.0423	22.0805	22.0728	21.9631	23.5188	23.7386	23.4407	20.2751	20.4234	21.6916	20.2314	21.0281	20.1674	20.1655	24.6777	23.6864	24.2519	25.3014	24.0047
PC(18:0_18:1)	PC	diacyl	2130	[M+H]	PC(36:1)	(18:0_18:1)	(36:1)	787.609	19.825	C44 H86 N1 O8 P1	2	3	26	100	A	2.7759	2.9454	3.132	2.7499	2.7234	2.8354	3.0966	3.0381	3.1567	2.7734	2.6472	2.6977	2.7401	2.7074	2.7174	2.7081	2.9831	2.8248	3.1516	3.2778	3.268
PC(15:2_22:5)	PC	diacyl	2817	[M+H]	PC(37:7)	(15:2_22:5)	(37:7)	789.531	14.4	C45 H76 N1 O8 P1	1	3	4	100	C	0.0114	0.0113	0.012	0.0114	0.0103	0.0113	0.0114	0.0123	0.0122	0.0111	0.0116	0.0117	0.01	0.0104	0.0106	0.0106	0.0116	0.0117	0.0134	0.0133	0.0136
PC(15:1_22:6)	PC	diacyl	2820	[M+H]	PC(37:7)	(15:1_22:6)	(37:7)	789.531	15.506	C45 H76 N1 O8 P1	1	3	4	66.7	C	0.5583	0.6485	0.6564	0.5971	0.5792	0.646	0.6285	0.6196	0.6256	0.6445	0.626	0.6383	0.5519	0.5425	0.5414	0.5752	0.6647	0.6175	0.6304	0.7037	0.6593
PC(O-18:3_20:4)	PC	alkyl-acyl	2136	[M+H]	PC(O-38:7)	(O-18:3_20:4)	(O-38:7)	789.567	14.615	C46 H80 N1 O7 P1	2	4	0	100	A	0.1027	0.114	0.119	0.1021	0.107	0.1102	0.1229	0.1183	0.116	0.1037	0.1045	0.105	0.1123	0.1105	0.1083	0.1071	0.1114	0.1081	0.1221	0.1162	0.1289
PC(O-38:7)	PC	alkyl-acyl	2137	[M+H]	PC(O-38:7)	(O-38:7)	(O-38:7)	789.567	14.901	C46 H80 N1 O7 P1	2	4	0	100	B	0.0218	0.0209	0.027	0.0279	0.0224	0.0222	0.0248	0.0272	0.0307	0.0178	0.0257	0.0242	0.0278	0.0258	0.0245	0.0281	0.0198	0.0311	0.0288	0.0234	0.0261
PC(O-16:1_22:6)	PC	alkyl-acyl	2139	[M+H]	PC(O-38:7)	(O-16:1_22:6)	(O-38:7)	789.567	15.619	C46 H80 N1 O7 P1	2	4	0	100	A	0.2401	0.2745	0.2663	0.2626	0.2334	0.2602	0.292	0.2813	0.2927	0.2543	0.253	0.2358	0.2428	0.2538	0.2465	0.2641	0.296	0.2666	0.2798	0.3111	0.2916
PC(18:0_18:0)	PC	diacyl	2147	[M+H]	PC(36:0)	(18:0_18:0)	(36:0)	789.625	20.787	C44 H88 N1 O8 P1	2	2	12	100	A	0.0374	0.0425	0.0408	0.0341	0.0355	0.0329	0.0341	0.0368	0.0366	0.032	0.0333	0.0299	0.0332	0.0337	0.0337	0.0352	0.0405	0.0398	0.0386	0.0426	0.0409
PC(O-38:6)	PC	alkyl-acyl	2171	[M+H]	PC(O-38:6)	(O-38:6)	(O-38:6)	791.583	16.11	C46 H82 N1 O7 P1	1	3	0	66.7	C	0.0231	0.0305	0.028	0.0245	0.0226	0.026	0.024	0.0239	0.0258	0.0248	0.0269	0.0231	0.018	0.0275	0.0235	0.0228	0.0232	0.0209	0.0275	0.0215	0.0239
PC(O-18:2_20:4)	PC	alkyl-acyl	2172	[M+H]	PC(O-38:6)	(O-18:2_20:4)	(O-38:6)	791.583	16.556	C46 H82 N1 O7 P1	3	3	0	100	A	0.4147	0.4185	0.4523	0.41	0.4132	0.4421	0.4628	0.4655	0.4842	0.4137	0.4218	0.4062	0.4	0.4268	0.4162	0.4154	0.4529	0.4385	0.486	0.4997	0.501
PC(O-20:5_18:1)	PC	alkyl-acyl	2175	[M+H]	PC(O-38:6)	(O-20:5_18:1)	(O-38:6)	791.583	17.277	C46 H82 N1 O7 P1	1	3	0	100	C	0.0179	0.0247	0.0248	0.0222	0.0158	0.0193	0.0118	0.0091	0.0167	0.0252	0.0181	0.0214	0.0243	0.0205	0.0228	0.0242	0.0251	0.0224	0.0214	0.0276	0.0245
PC(17:1_20:4)	PC	diacyl	2181	[M+H]	PC(37:5)	(17:1_20:4)	(37:5)	793.562	14.19	C45 H80 N1 O8 P1	2	3	10	100	A	0.0665	0.0713	0.0749	0.0676	0.0687	0.0709	0.0739	0.0706	0.076	0.0636	0.0664	0.0692	0.0615	0.0671	0.0655	0.0664	0.0699	0.0654	0.0744	0.0804	0.077
PC(37:5)	PC	diacyl	2183	[M+H]	PC(37:5)	(37:5)	(37:5)	793.562	14.806	C45 H80 N1 O8 P1	1	3	10	100	C	0.0562	0.0498	0.0748	0.0521	0.0492	0.0574	0.0578	0.0646	0.0599	0.0616	0.0615	0.0517	0.0653	0.0708	0.063	0.0567	0.0608	0.0678	0.07	0.0752	0.0715
PC(19:4_18:1)	PC	diacyl	2184	[M+H]	PC(37:5)	(19:4_18:1)	(37:5)	793.562	15.792	C45 H80 N1 O8 P1	1	3	10	66.7	C	0.0056	0.006	0.0086	0.0073	0.0072	0.0072	0.0084	0.0073	0.0076	0.0087	0.0064	0.0073	0.0068	0.007	0.0062	0.0067	0.0082	0.0076	0.0076	0.0092	0.0093
PC(O-18:1_20:4)	PC	alkyl-acyl	2195	[M+H]	PC(O-38:5)	(O-18:1_20:4)	(O-38:5)	793.599	16.933	C46 H84 N1 O7 P1	2	2	0	100	A	0.0512	0.062	0.0519	0.0458	0.0481	0.0499	0.0466	0.0518	0.0513	0.0484	0.0472	0.0458	0.0456	0.0496	0.0467	0.0457	0.0525	0.0484	0.0591	0.0579	0.0525
PC(O-18:1_20:4)	PC	alkyl-acyl	2197	[M+H]	PC(O-38:5)	(O-18:1_20:4)	(O-38:5)	793.599	19.078	C46 H84 N1 O7 P1	2	2	0	100	A	0.0674	0.0795	0.0768	0.065	0.0656	0.0663	0.0724	0.0781	0.0826	0.0647	0.0573	0.0634	0.0649	0.0623	0.0589	0.065	0.0742	0.0695	0.0838	0.0792	0.0762
PC(17:0_20:4)	PC	diacyl	2212	[M+H]	PC(37:4)	(17:0_20:4)	(37:4)	795.578	16	C45 H82 N1 O8 P1	2	3	14	100	A	0.0747	0.0795	0.0799	0.0819	0.0757	0.0861	0.0833	0.0808	0.0817	0.0739	0.0813	0.073	0.0765	0.0843	0.0816	0.0763	0.0796	0.0801	0.0956	0.0887	0.0816
PC(17:0_20:4)	PC	diacyl	2213	[M+H]	PC(37:4)	(17:0_20:4)	(37:4)	795.578	16.409	C45 H82 N1 O8 P1	2	3	14	100	A	0.5743	0.6209	0.67	0.6112	0.6282	0.6274	0.687	0.6686	0.7146	0.6173	0.6002	0.6285	0.5716	0.6274	0.6218	0.6074	0.6873	0.6511	0.7185	0.731	0.6803
PC(19:4_18:0)	PC	diacyl	2214	[M+H]	PC(37:4)	(19:4_18:0)	(37:4)	795.578	18.181	C45 H82 N1 O8 P1	1	3	14	100	C	0.0127	0.0145	0.0146	0.0118	0.0142	0.0153	0.0141	0.0132	0.0153	0.0126	0.0123	0.013	0.012	0.0122	0.0122	0.0116	0.0168	0.015	0.0139	0.0158	0.0152
PC(O-20:4_18:0)	PC	alkyl-acyl	2823	[M+H]	PC(O-38:4)	(O-20:4_18:0)	(O-38:4)	795.614	18.804	C46 H86 N1 O7 P1	1	2	0	100	C	0.0138	0.0185	0.0147	0.0122	0.0134	0.0131	0.0139	0.0137	0.0128	0.013	0.0143	0.014	0.0127	0.0126	0.0111	0.0124	0.0133	0.0125	0.0145	0.0163	0.0171
PC(O-38:4)	PC	alkyl-acyl	2824	[M+H]	PC(O-38:4)	(O-38:4)	(O-38:4)	795.614	19.518	C46 H86 N1 O7 P1	1	2	0	100	C	0.0254	0.0351	0.0296	0.0258	0.0203	0.0264	0.0254	0.0248	0.0283	0.0258	0.0252	0.0245	0.0221	0.0235	0.0234	0.0248	0.0283	0.0262	0.0303	0.0297	0.0291
PC(19:1_18:2)	PC	diacyl	2218	[M+H]	PC(37:3)	(19:1_18:2)	(37:3)	797.593	16.893	C45 H84 N1 O8 P1	2	3	14	100	A	0.0803	0.087	0.0912	0.0829	0.0835	0.0866	0.0785	0.0899	0.0973	0.0858	0.0836	0.0824	0.0852	0.0917	0.0882	0.0801	0.0935	0.0892	0.1007	0.0985	0.0913
PC(37:3)	PC	diacyl	2219	[M+H]	PC(37:3)	(37:3)	(37:3)	797.593	17.488	C45 H84 N1 O8 P1	2	3	14	100	A	0.04	0.0418	0.0401	0.0342	0.034	0.0391	0.0403	0.0439	0.0465	0.0389	0.0386	0.0358	0.0375	0.0352	0.0387	0.0394	0.0438	0.039	0.0394	0.0448	0.0435
PC(O-17:3_22:6)	PC	alkyl-acyl	2826	[M+H]	PC(O-39:9)	(O-17:3_22:6)	(O-39:9)	799.552	17.173	C47 H78 N1 O7 P1	1	1	0	66.7	B	0.0076	0.0081	0.0062	0.0085	0.0068	0.0067	0.0076	0.0066	0.007	0.0064	0.0071	0.0063	0.0059	0.0079	0.0072	0.0075	0.0069	0.0069	0.0093	0.0084	0.0086
PC(19:0_18:2)	PC	diacyl	2225	[M+H]	PC(37:2)	(19:0_18:2)	(37:2)	799.609	19.127	C45 H86 N1 O8 P1	2	2	14	100	A	0.0671	0.0671	0.0706	0.0675	0.0578	0.0654	0.0646	0.0697	0.0729	0.0583	0.0586	0.0577	0.0553	0.0571	0.0541	0.0604	0.0658	0.0626	0.0716	0.0722	0.0741
PC(19:0_18:2)	PC	diacyl	2226	[M+H]	PC(37:2)	(19:0_18:2)	(37:2)	799.609	19.492	C45 H86 N1 O8 P1	2	2	14	100	A	0.234	0.2514	0.2652	0.237	0.2207	0.2447	0.2581	0.2478	0.2737	0.22	0.2338	0.2354	0.206	0.2314	0.231	0.2337	0.2599	0.2389	0.2841	0.2727	0.2615
PC(O-39:8)	PC	alkyl-acyl	2230	[M+H]	PC(O-39:8)	(O-39:8)	(O-39:8)	801.567	20.691	C47 H80 N1 O7 P1	2	2	0	100	B	0.0037	0.0041	0.0042	0.0032	0.0032	0.0035	0.0033	0.0036	0.0035	0.0034	0.004	0.004	0.0038	0.0035	0.0038	0.0039	0.0045	0.0047	0.0036	0.0049	0.0039
PC(19:0_18:1)	PC	diacyl	2236	[M+H]	PC(37:1)	(19:0_18:1)	(37:1)	801.625	20.473	C45 H88 N1 O8 P1	2	2	14	100	A	0.0244	0.0265	0.0283	0.0231	0.0194	0.0248	0.0227	0.0229	0.0262	0.0229	0.0181	0.0242	0.0207	0.0169	0.0218	0.022	0.0251	0.0211	0.0238	0.0293	0.0251
PC(18:2_20:5)	PC	diacyl	2245	[M+H]	PC(38:7)	(18:2_20:5)	(38:7)	803.547	12.202	C46 H78 N1 O8 P1	3	4	11	100	A	0.1566	0.1532	0.1692	0.1521	0.1482	0.1556	0.1574	0.1464	0.1645	0.1484	0.1493	0.1432	0.1279	0.144	0.1261	0.1374	0.1383	0.127	0.1594	0.17	0.1727
PC(16:1_22:6)	PC	diacyl	2247	[M+H]	PC(38:7)	(16:1_22:6)	(38:7)	803.547	12.59	C46 H78 N1 O8 P1	2	4	11	100	A	0.036	0.0256	0.0467	0.041	0.0265	0.0277	0.0423	0.0271	0.0283	0.0412	0.0554	0.0389	0.0338	0.0434	0.0427	0.0428	0.0387	0.0366	0.0465	0.0306	0.0507
PC(O-17:1_22:6)	PC	alkyl-acyl	2827	[M+H]	PC(O-39:7)	(O-17:1_22:6)	(O-39:7)	803.583	20.503	C47 H82 N1 O7 P1	1	1	0	100	B	0.0194	0.0215	0.0202	0.0171	0.0164	0.0167	0.0191	0.0181	0.0205	0.0192	0.0176	0.0171	0.0189	0.0174	0.0176	0.0183	0.0212	0.0192	0.02	0.0216	0.0194
PC(18:2_20:4)	PC	diacyl	2277	[M+H]	PC(38:6)	(18:2_20:4)	(38:6)	805.562	13.541	C46 H80 N1 O8 P1	3	6	24	100	A	1.136	1.2785	1.3111	1.2648	1.3363	1.3405	1.3643	1.3259	1.5334	1.1624	1.3009	1.2753	1.2656	1.2579	1.2283	1.3128	1.4029	1.3739	1.3327	1.5257	1.4192
PC(16:0_22:6)	PC	diacyl	2279	[M+H]	PC(38:6)	(16:0_22:6)	(38:6)	805.562	14.533	C46 H80 N1 O8 P1	4	6	24	100	A	5.473	5.9091	6.1995	5.398	5.396	5.5008	5.9272	5.7833	6.2365	5.6287	5.558	5.3582	5.5508	5.9103	5.407	5.7796	5.7985	5.9073	6.3593	6.2403	6.2543
PC(18:1_20:4)	PC	diacyl	2307	[M+H]	PC(38:5)	(18:1_20:4)	(38:5)	807.578	15.251	C46 H82 N1 O8 P1	3	4	24	100	A	2.3995	2.6476	2.667	2.4119	2.4011	2.5414	2.7068	2.7959	2.7887	2.5012	2.4479	2.4489	2.3204	2.3716	2.2783	2.6432	2.636	2.6489	2.8018	2.881	2.6885
PC(18:0_20:5)	PC	diacyl	2311	[M+H]	PC(38:5)	(18:0_20:5)	(38:5)	807.578	16.076	C46 H82 N1 O8 P1	3	4	24	100	A	2.6024	2.4892	2.6202	2.2369	2.3623	2.4654	2.5568	2.6681	2.7691	2.4889	2.3198	2.33	2.4766	2.4946	2.2538	2.3168	2.5453	2.4243	2.6111	2.4955	2.4507
PC(18:0_20:4)	PC	diacyl	1723	[M+H]	PC(38:4)	(18:0_20:4)	(38:4)	809.593	17.685	C46 H84 N1 O8 P1	4	5	22	100	A	8.8744	9.8793	9.44	8.8918	9.0155	9.3646	9.7575	9.8753	10.0613	9.2232	8.7672	8.859	9.4924	9.5824	8.6243	8.9199	9.9163	9.4498	9.7979	10.7443	9.8977
PC(20:1_18:2)	PC	diacyl	2339	[M+H]	PC(38:3)	(20:1_18:2)	(38:3)	811.609	18.197	C46 H86 N1 O8 P1	3	4	19	100	A	0.5093	0.5678	0.5673	0.5206	0.5139	0.5456	0.563	0.5482	0.5721	0.4173	0.4599	0.5001	0.4375	0.4823	0.4967	0.4934	0.6121	0.5455	0.553	0.561	0.5215
PC(18:0_20:3)	PC	diacyl	2340	[M+H]	PC(38:3)	(18:0_20:3)	(38:3)	811.609	18.914	C46 H86 N1 O8 P1	3	4	19	100	A	0.8361	0.884	0.9161	0.8583	0.8072	0.8163	0.8806	0.9134	0.9532	0.8228	0.8428	0.7913	0.8199	0.7786	0.8101	0.757	0.9049	0.8094	0.9941	0.9439	0.9425
PC(18:0_20:3)	PC	diacyl	2341	[M+H]	PC(38:3)	(18:0_20:3)	(38:3)	811.609	19.588	C46 H86 N1 O8 P1	2	4	19	100	A	0.095	0.1126	0.108	0.117	0.113	0.1046	0.1075	0.0995	0.1135	0.104	0.0908	0.0963	0.0806	0.0938	0.1093	0.0846	0.1212	0.1147	0.1221	0.1174	0.1348
PC(18:1_20:1)	PC	diacyl	2347	[M+H]	PC(38:2)	(18:1_20:1)	(38:2)	813.625	19.875	C46 H88 N1 O8 P1	2	4	19	66.7	A	0.0847	0.0854	0.1061	0.0882	0.0907	0.0928	0.1023	0.1026	0.0932	0.0914	0.0877	0.0853	0.0893	0.0885	0.0865	0.0857	0.0967	0.1044	0.1016	0.1251	0.1103
PC(18:0_20:2)	PC	diacyl	2348	[M+H]	PC(38:2)	(18:0_20:2)	(38:2)	813.625	20.067	C46 H88 N1 O8 P1	2	4	19	100	A	0.1233	0.1379	0.1399	0.1297	0.1153	0.1396	0.1443	0.1469	0.1313	0.1169	0.1054	0.1083	0.1214	0.1181	0.1081	0.1334	0.1196	0.137	0.148	0.1352	0.1364
PC(P-22:7_18:0)	PC	alkenyl-acyl	2837	[M+H]	PC(P-40:7)	(P-22:7_18:0)	(P-40:7)	815.583	15.912	C48 H82 N1 O7 P1	2	1	0	100	B	0.0355	0.0407	0.0376	0.0348	0.0343	0.0358	0.0371	0.0385	0.0441	0.036	0.0384	0.0355	0.0346	0.0382	0.0362	0.0375	0.039	0.04	0.0447	0.0439	0.045
PC(18:0_20:1)	PC	diacyl	2365	[M+H]	PC(38:1)	(18:0_20:1)	(38:1)	815.64	20.79	C46 H90 N1 O8 P1	2	2	22	100	A	0.051	0.0578	0.0544	0.0494	0.0475	0.0468	0.0436	0.0497	0.0475	0.0439	0.0468	0.0457	0.0441	0.0479	0.0449	0.0469	0.0592	0.0528	0.0555	0.0548	0.0569
PC(O-40:7)	PC	alkyl-acyl	2841	[M+H]	PC(O-40:7)	(O-40:7)	(O-40:7)	817.599	16.343	C48 H84 N1 O7 P1	1	1	0	100	C	0.0115	0.0149	0.0114	0.0104	0.0112	0.0111	0.012	0.0118	0.0122	0.011	0.011	0.0119	0.0097	0.0116	0.0098	0.0103	0.0126	0.0126	0.0139	0.0139	0.0123
PC(O-40:7)	PC	alkyl-acyl	2843	[M+H]	PC(O-40:7)	(O-40:7)	(O-40:7)	817.599	18.4	C48 H84 N1 O7 P1	1	1	0	100	C	0.0167	0.0182	0.0171	0.0144	0.0171	0.0158	0.0154	0.0171	0.0179	0.012	0.0106	0.0139	0.0101	0.013	0.0102	0.0124	0.0198	0.0169	0.0161	0.0158	0.0154
PC(P-41:12)	PC	alkenyl-acyl	2844	[M+H]	PC(P-41:12)	(P-41:12)	(P-41:12)	819.52	13.892	C49 H74 N1 O7 P1	1	1	0	100	C	0.0091	0.0091	0.0093	0.0086	0.0094	0.0103	0.011	0.012	0.0112	0.0062	0.0064	0.0072	0.0064	0.0065	0.0058	0.0077	0.0069	0.0066	0.0093	0.0091	0.0082
PC(39:6)	PC	diacyl	2375	[M+H]	PC(39:6)	(39:6)	(39:6)	819.578	15.225	C47 H82 N1 O8 P1	1	3	6	66.7	C	0.0046	0.0035	0.0051	0.0021	0.0051	0.0049	0.0046	0.0049	0.0038	0.0046	0.0039	0.0044	0.0038	0.0033	0.0034	0.0026	0.0052	0.0041	0.0057	0.0055	0.0039
PC(17:0_22:6)	PC	diacyl	2376	[M+H]	PC(39:6)	(17:0_22:6)	(39:6)	819.578	15.822	C47 H82 N1 O8 P1	2	3	6	100	A	0.0461	0.0487	0.0495	0.0445	0.0422	0.0509	0.05	0.0457	0.0576	0.0437	0.046	0.0459	0.0444	0.0482	0.0463	0.0454	0.0512	0.0467	0.0541	0.0573	0.0557
PC(19:1_20:4)	PC	diacyl	2391	[M+H]	PC(39:5)	(19:1_20:4)	(39:5)	821.593	16.612	C47 H84 N1 O8 P1	2	3	8	100	A	0.0461	0.0411	0.0565	0.0434	0.0496	0.0528	0.0659	0.0571	0.0606	0.0563	0.0423	0.0467	0.0422	0.0437	0.0448	0.0488	0.0559	0.0476	0.0445	0.0538	0.0495
PC(39:4)	PC	diacyl	2399	[M+H]	PC(39:4)	(39:4)	(39:4)	823.609	15.942	C47 H86 N1 O8 P1	1	2	10	66.7	C	0.0076	0.0095	0.009	0.0086	0.0077	0.0078	0.0086	0.0087	0.0098	0.0083	0.0077	0.0085	0.008	0.0099	0.008	0.0092	0.0086	0.0078	0.0093	0.0106	0.0097
PC(39:4)	PC	diacyl	2400	[M+H]	PC(39:4)	(39:4)	(39:4)	823.609	18.751	C47 H86 N1 O8 P1	1	2	10	100	C	0.0308	0.0319	0.0341	0.0313	0.0313	0.032	0.0338	0.0329	0.0369	0.0288	0.0279	0.0297	0.0273	0.0302	0.0283	0.0287	0.0355	0.0311	0.034	0.0376	0.0326
PC(19:0_20:4)	PC	diacyl	2401	[M+H]	PC(39:4)	(19:0_20:4)	(39:4)	823.609	19.169	C47 H86 N1 O8 P1	2	2	10	100	A	0.1373	0.1486	0.1514	0.1313	0.1228	0.1343	0.1514	0.1484	0.1532	0.109	0.1066	0.1028	0.1022	0.097	0.0974	0.1296	0.1423	0.1339	0.1449	0.1388	0.1425
PC(O-40:4)	PC	alkyl-acyl	2847	[M+H]	PC(O-40:4)	(O-40:4)	(O-40:4)	823.645	20.723	C48 H90 N1 O7 P1	1	1	0	100	C	0.0074	0.0102	0.0078	0.0065	0.0061	0.0066	0.0073	0.0074	0.008	0.0074	0.0066	0.0063	0.0066	0.0073	0.006	0.0066	0.0078	0.007	0.0075	0.009	0.0077
PC(39:3)	PC	diacyl	2944	[M+H]	PC(39:3)	(39:3)	(39:3)	825.625	19.879	C47 H88 N1 O8 P1	1	1	12	66.7	C	0.0119	0.0106	0.0129	0.0099	0.0109	0.0099	0.012	0.0119	0.0126	0.01	0.011	0.0107	0.0107	0.009	0.0103	0.0104	0.0122	0.0116	0.0113	0.0125	0.0131
PC(20:4_20:5)	PC	diacyl	2414	[M+H]	PC(40:9)	(20:4_20:5)	(40:9)	827.547	11.826	C48 H78 N1 O8 P1	2	3	6	100	A	0.0143	0.0157	0.0159	0.0145	0.0149	0.0159	0.0166	0.0158	0.0189	0.015	0.0142	0.0134	0.0139	0.0157	0.0145	0.0134	0.0149	0.0147	0.0169	0.0175	0.0174
PC(39:2)	PC	diacyl	2848	[M+H]	PC(39:2)	(39:2)	(39:2)	827.64	20.718	C47 H90 N1 O8 P1	1	1	12	100	C	0.0053	0.0074	0.0051	0.0059	0.0068	0.0069	0.0053	0.0071	0.0038	0.0066	0.0077	0.0072	0.0065	0.0041	0.0071	0.0048	0.0073	0.0073	0.0083	0.007	0.0081
PC(39:2)	PC	diacyl	2849	[M+H]	PC(39:2)	(39:2)	(39:2)	827.64	22.089	C47 H90 N1 O8 P1	1	1	12	66.7	C	0.0062	0.0067	0.0072	0.0067	0.0064	0.007	0.0074	0.0072	0.0082	0.0076	0.0065	0.0085	0.015	0.0128	0.0126	0.0083	0.0083	0.0079	0.0096	0.011	0.0094
PC(O-40:2)	PC	alkyl-acyl	2851	[M+H]	PC(O-40:2)	(O-40:2)	(O-40:2)	827.677	22.269	C48 H94 N1 O7 P1	1	2	0	66.7	C	0.0034	0.0043	0.0044	0.0038	0.0035	0.004	0.0035	0.0039	0.0046	0.0026	0.0035	0.0037	0.0021	0.0016	0.0016	0.0033	0.0045	0.0041	0.0047	0.0042	0.0037
PC(18:2_22:6)	PC	diacyl	2417	[M+H]	PC(40:8)	(18:2_22:6)	(40:8)	829.562	12.992	C48 H80 N1 O8 P1	2	3	8	100	A	0.4207	0.4268	0.4938	0.4252	0.4447	0.4387	0.4251	0.4908	0.5379	0.3586	0.3613	0.393	0.3038	0.3112	0.296	0.4035	0.4622	0.4565	0.4315	0.459	0.4452
PC(18:2_22:5)	PC	diacyl	2421	[M+H]	PC(40:7)	(18:2_22:5)	(40:7)	831.578	13.731	C48 H82 N1 O8 P1	3	4	12	100	A	0.0931	0.104	0.1055	0.1184	0.1197	0.1224	0.123	0.1274	0.1379	0.1185	0.1202	0.1171	0.1206	0.1161	0.1126	0.1175	0.1285	0.1274	0.1271	0.1343	0.1314
PC(40:7)	PC	diacyl	2423	[M+H]	PC(40:7)	(40:7)	(40:7)	831.578	14.227	C48 H82 N1 O8 P1	1	4	12	100	C	0.0506	0.0573	0.0486	0.0513	0.0509	0.0542	0.0504	0.0521	0.0594	0.0556	0.0538	0.0473	0.0518	0.0555	0.0526	0.0573	0.0628	0.0587	0.0603	0.0618	0.0717
PC(18:1_22:6)	PC	diacyl	2424	[M+H]	PC(40:7)	(18:1_22:6)	(40:7)	831.578	14.815	C48 H82 N1 O8 P1	3	4	12	100	A	0.4216	0.4609	0.5083	0.4487	0.4285	0.4592	0.4788	0.461	0.5072	0.4471	0.4429	0.4526	0.4492	0.4703	0.4529	0.4528	0.4217	0.4788	0.533	0.5323	0.5126
PC(18:2_22:4)	PC	diacyl	2446	[M+H]	PC(40:6)	(18:2_22:4)	(40:6)	833.593	15.21	C48 H84 N1 O8 P1	2	6	13	100	A	0.0459	0.0465	0.0496	0.0436	0.0455	0.0512	0.05	0.0516	0.0546	0.0437	0.0439	0.05	0.0368	0.0387	0.0382	0.048	0.052	0.046	0.0498	0.0537	0.0495
PC(20:2_20:4)	PC	diacyl	2447	[M+H]	PC(40:6)	(20:2_20:4)	(40:6)	833.593	15.799	C48 H84 N1 O8 P1	2	6	13	100	A	0.1864	0.2112	0.1958	0.1858	0.1997	0.1992	0.1934	0.2104	0.2301	0.1775	0.2049	0.1962	0.1858	0.1885	0.1751	0.1857	0.206	0.1849	0.2214	0.2554	0.2459
PC(18:0_22:6)	PC	diacyl	2452	[M+H]	PC(40:6)	(18:0_22:6)	(40:6)	833.593	17.111	C48 H84 N1 O8 P1	3	6	13	100	A	1.237	1.3722	1.3465	1.334	1.2867	1.3543	1.4375	1.371	1.3506	1.2825	1.2535	1.2602	1.3038	1.3233	1.2914	1.2779	1.4409	1.3761	1.4363	1.5388	1.3562
PC(20:2_20:3)	PC	diacyl	2464	[M+H]	PC(40:5)	(20:2_20:3)	(40:5)	835.609	16.865	C48 H86 N1 O8 P1	2	6	24	66.7	A	0.0332	0.0366	0.043	0.0358	0.0372	0.0365	0.0354	0.0399	0.0391	0.0334	0.0354	0.0349	0.0336	0.0348	0.0345	0.0348	0.0372	0.0357	0.0409	0.0462	0.0429
PC(20:1_20:4)	PC	diacyl	2468	[M+H]	PC(40:5)	(20:1_20:4)	(40:5)	835.609	17.931	C48 H86 N1 O8 P1	2	6	24	100	A	0.1732	0.221	0.2244	0.2035	0.2265	0.2407	0.2175	0.1934	0.2039	0.1754	0.1592	0.183	0.1951	0.1677	0.1941	0.195	0.2131	0.2034	0.1962	0.2056	0.1832
PC(18:0_22:5)	PC	diacyl	2471	[M+H]	PC(40:5)	(18:0_22:5)	(40:5)	835.609	18.89	C48 H86 N1 O8 P1	2	6	24	100	A	0.1779	0.1674	0.179	0.1687	0.1633	0.1655	0.1639	0.1697	0.1851	0.1666	0.1656	0.1627	0.1728	0.1633	0.167	0.1489	0.183	0.1595	0.2007	0.1957	0.1979
PC(18:2_22:2)	PC	diacyl	2482	[M+H]	PC(40:4)	(18:2_22:2)	(40:4)	837.625	18.773	C48 H88 N1 O8 P1	2	4	24	66.7	A	0.0736	0.0892	0.0929	0.0881	0.0803	0.0703	0.0937	0.0806	0.0819	0.0767	0.0809	0.0865	0.0823	0.082	0.0777	0.076	0.0775	0.0856	0.0941	0.0921	0.096
PC(18:0_22:4)	PC	diacyl	2484	[M+H]	PC(40:4)	(18:0_22:4)	(40:4)	837.625	19.586	C48 H88 N1 O8 P1	2	4	24	100	A	0.1152	0.1367	0.1295	0.1122	0.107	0.1224	0.1215	0.1135	0.125	0.1214	0.118	0.1151	0.118	0.1166	0.0993	0.1114	0.128	0.1198	0.1228	0.1287	0.1427
PC(20:0_20:4)	PC	diacyl	2485	[M+H]	PC(40:4)	(20:0_20:4)	(40:4)	837.625	20.031	C48 H88 N1 O8 P1	2	4	24	100	A	0.1109	0.1166	0.1199	0.1037	0.1057	0.1085	0.1192	0.1091	0.1237	0.1004	0.0905	0.0999	0.0984	0.1012	0.0937	0.1037	0.104	0.1102	0.1184	0.1254	0.1185
PC(22:1_18:2)	PC	diacyl	2487	[M+H]	PC(40:3)	(22:1_18:2)	(40:3)	839.64	20.173	C48 H90 N1 O8 P1	2	2	20	100	A	0.0912	0.1013	0.0994	0.08	0.0823	0.085	0.0866	0.0866	0.1033	0.0777	0.0639	0.0823	0.0703	0.0816	0.0702	0.0852	0.0962	0.0933	0.0983	0.1017	0.0955
PC(22:0_18:2)	PC	diacyl	2502	[M+H]	PC(40:2)	(22:0_18:2)	(40:2)	841.656	21.119	C48 H92 N1 O8 P1	2	3	18	100	A	0.0578	0.0657	0.066	0.0543	0.055	0.0584	0.0615	0.0572	0.0641	0.051	0.0411	0.0581	0.044	0.0506	0.0459	0.0505	0.0644	0.0594	0.0631	0.0633	0.0635
PC(16:0_24:1)	PC	diacyl	2508	[M+H]	PC(40:1)	(16:0_24:1)	(40:1)	843.672	21.536	C48 H94 N1 O8 P1	2	3	20	100	A	0.0343	0.0379	0.036	0.0312	0.0347	0.0351	0.0323	0.0365	0.0391	0.0221	0.022	0.0238	0.0281	0.028	0.0254	0.0313	0.0345	0.0347	0.0369	0.0414	0.0351
PC(16:0_24:0)	PC	diacyl	2511	[M+H]	PC(40:0)	(16:0_24:0)	(40:0)	845.687	22.3	C48 H96 N1 O8 P1	2	2	9	100	A	0.0239	0.0265	0.0278	0.0229	0.0214	0.0224	0.0264	0.0253	0.0277	0.0274	0.0261	0.0235	0.0253	0.0229	0.0253	0.0218	0.0246	0.0247	0.0242	0.0295	0.0269
PC(41:6)	PC	diacyl	2853	[M+H]	PC(41:6)	(41:6)	(41:6)	847.609	18.542	C49 H86 N1 O8 P1	1	1	2	100	C	0.0147	0.0151	0.0162	0.0146	0.015	0.0162	0.0156	0.0156	0.0169	0.0153	0.0116	0.0137	0.012	0.0139	0.0123	0.0134	0.0173	0.0163	0.0183	0.0167	0.0166
PC(20:4_22:6)	PC	diacyl	2522	[M+H]	PC(42:10)	(20:4_22:6)	(42:10)	853.562	12.681	C50 H80 N1 O8 P1	2	2	3	100	A	0.0422	0.0461	0.0484	0.0424	0.0428	0.0434	0.0431	0.0438	0.0452	0.0407	0.039	0.0382	0.0398	0.0419	0.0403	0.0405	0.044	0.041	0.0467	0.0504	0.0479
PC(20:4_22:5)	PC	diacyl	2526	[M+H]	PC(42:9)	(20:4_22:5)	(42:9)	855.578	13.411	C50 H82 N1 O8 P1	2	2	4	100	A	0.0262	0.0279	0.0271	0.0241	0.0225	0.0247	0.0235	0.0242	0.036	0.0273	0.0208	0.0232	0.0214	0.0246	0.0287	0.0274	0.0327	0.0254	0.0278	0.0303	0.0338
PC(42:9)	PC	diacyl	2529	[M+H]	PC(42:9)	(42:9)	(42:9)	855.578	14.108	C50 H82 N1 O8 P1	1	2	4	100	C	0.0056	0.0077	0.0078	0.0065	0.0058	0.0072	0.0077	0.0063	0.0086	0.0045	0.0061	0.0062	0.0073	0.007	0.0045	0.0067	0.0054	0.0067	0.008	0.0084	0.0075
PC(18:2_24:6)	PC	diacyl	2534	[M+H]	PC(42:8)	(18:2_24:6)	(42:8)	857.593	14.447	C50 H84 N1 O8 P1	2	3	4	100	A	0.0243	0.0273	0.0276	0.0254	0.0255	0.025	0.0293	0.0276	0.0287	0.0237	0.0234	0.0226	0.0232	0.025	0.0235	0.0229	0.0246	0.0264	0.0263	0.0281	0.0281
PC(20:4_22:4)	PC	diacyl	2536	[M+H]	PC(42:8)	(20:4_22:4)	(42:8)	857.593	14.899	C50 H84 N1 O8 P1	2	3	4	100	A	0.0256	0.0291	0.0301	0.0285	0.0274	0.0292	0.0283	0.0266	0.0303	0.0259	0.0244	0.0274	0.0271	0.0267	0.0259	0.0266	0.0262	0.0309	0.0301	0.0306	0.0336
PC(42:8)	PC	diacyl	2537	[M+H]	PC(42:8)	(42:8)	(42:8)	857.593	15.202	C50 H84 N1 O8 P1	1	3	4	100	C	0.0117	0.0112	0.0122	0.0112	0.0111	0.0118	0.0132	0.0123	0.0165	0.0108	0.0109	0.0114	0.0099	0.0094	0.0092	0.011	0.0134	0.012	0.0122	0.0147	0.0112
PC(42:7)	PC	diacyl	2544	[M+H]	PC(42:7)	(42:7)	(42:7)	859.609	15.644	C50 H86 N1 O8 P1	1	2	6	100	C	0.014	0.0145	0.0156	0.0138	0.0143	0.0146	0.0158	0.017	0.0166	0.0148	0.0137	0.0145	0.013	0.0138	0.0146	0.0154	0.016	0.0139	0.0142	0.0147	0.0169
PC(42:7)	PC	diacyl	2545	[M+H]	PC(42:7)	(42:7)	(42:7)	859.609	16.036	C50 H86 N1 O8 P1	1	2	6	100	C	0.0162	0.0141	0.013	0.0144	0.0158	0.016	0.0175	0.015	0.018	0.0156	0.0139	0.0139	0.0128	0.0174	0.0118	0.0141	0.0189	0.0166	0.0196	0.0129	0.0157
PC(42:7)	PC	diacyl	2546	[M+H]	PC(42:7)	(42:7)	(42:7)	859.609	16.394	C50 H86 N1 O8 P1	1	2	6	100	C	0.012	0.0135	0.013	0.012	0.0129	0.0132	0.0161	0.0145	0.0144	0.0132	0.0132	0.0149	0.0109	0.0115	0.0131	0.0105	0.0149	0.0126	0.0144	0.0169	0.013
PC(42:7)	PC	diacyl	2547	[M+H]	PC(42:7)	(42:7)	(42:7)	859.609	16.763	C50 H86 N1 O8 P1	1	2	6	100	C	0.0081	0.0108	0.0123	0.0111	0.0104	0.0101	0.0106	0.0111	0.0127	0.011	0.0106	0.011	0.0099	0.011	0.0083	0.0099	0.0125	0.0102	0.012	0.0146	0.0105
PC(42:7)	PC	diacyl	2548	[M+H]	PC(42:7)	(42:7)	(42:7)	859.609	17.177	C50 H86 N1 O8 P1	2	2	6	100	A	0.0211	0.0224	0.0212	0.0188	0.0195	0.0224	0.0227	0.021	0.0185	0.0193	0.0174	0.0176	0.0211	0.0206	0.0189	0.0195	0.0236	0.0204	0.0222	0.023	0.0203
PC(42:6)	PC	diacyl	2858	[M+H]	PC(42:6)	(42:6)	(42:6)	861.625	17.34	C50 H88 N1 O8 P1	1	1	8	100	C	0.0337	0.0367	0.0376	0.0367	0.0338	0.037	0.0391	0.0378	0.0387	0.0346	0.037	0.0366	0.0367	0.0367	0.0365	0.0365	0.0408	0.0376	0.0386	0.0413	0.0419
PC(42:6)	PC	diacyl	2859	[M+H]	PC(42:6)	(42:6)	(42:6)	861.625	17.96	C50 H88 N1 O8 P1	1	1	8	100	C	0.0053	0.0048	0.0055	0.0052	0.008	0.0052	0.0057	0.0056	0.0068	0.0043	0.005	0.0063	0.0056	0.007	0.0062	0.0074	0.0059	0.0068	0.0073	0.0065	0.0056
PC(42:6)	PC	diacyl	2860	[M+H]	PC(42:6)	(42:6)	(42:6)	861.625	18.34	C50 H88 N1 O8 P1	1	1	8	100	C	0.0363	0.0442	0.0461	0.0404	0.0402	0.0441	0.041	0.0465	0.0456	0.034	0.0283	0.0385	0.0304	0.034	0.0321	0.038	0.0505	0.0445	0.0394	0.0447	0.0419
PC(42:6)	PC	diacyl	2861	[M+H]	PC(42:6)	(42:6)	(42:6)	861.625	18.832	C50 H88 N1 O8 P1	1	1	8	66.7	C	0.0163	0.0186	0.0203	0.0181	0.0156	0.0184	0.0151	0.0198	0.0202	0.0172	0.018	0.0157	0.0164	0.0179	0.0169	0.0175	0.0148	0.0149	0.0209	0.0215	0.0198
PC(42:6)	PC	diacyl	2862	[M+H]	PC(42:6)	(42:6)	(42:6)	861.625	19.691	C50 H88 N1 O8 P1	1	1	8	100	C	0.0091	0.0096	0.0103	0.0099	0.0086	0.0109	0.0112	0.0096	0.0114	0.0086	0.0087	0.0089	0.0082	0.0102	0.0092	0.0098	0.0099	0.0095	0.0118	0.011	0.0111
PC(42:5)	PC	diacyl	2557	[M+H]	PC(42:5)	(42:5)	(42:5)	863.64	19.412	C50 H90 N1 O8 P1	1	2	9	66.7	C	0.0082	0.0111	0.0098	0.0084	0.0072	0.0093	0.0067	0.0105	0.0108	0.014	0.0117	0.0115	0.012	0.0133	0.0121	0.0094	0.0085	0.0081	0.0111	0.0149	0.0113
PC(42:5)	PC	diacyl	2558	[M+H]	PC(42:5)	(42:5)	(42:5)	863.64	19.616	C50 H90 N1 O8 P1	1	2	9	66.7	C	0.007	0.0092	0.0061	0.008	0.0066	0.0079	0.0069	0.006	0.0078	0.0075	0.0062	0.0053	0.0056	0.0077	0.0061	0.0067	0.006	0.0076	0.0074	0.0057	0.0051
PC(22:1_20:4)	PC	diacyl	2559	[M+H]	PC(42:5)	(22:1_20:4)	(42:5)	863.64	19.995	C50 H90 N1 O8 P1	2	2	9	100	A	0.0564	0.059	0.0619	0.058	0.0576	0.0607	0.0678	0.0593	0.0601	0.0568	0.0521	0.0492	0.0534	0.0587	0.0543	0.0551	0.0601	0.0583	0.0652	0.0719	0.0652
PC(18:2_24:2)	PC	diacyl	2565	[M+H]	PC(42:4)	(18:2_24:2)	(42:4)	865.656	20.362	C50 H92 N1 O8 P1	2	3	20	100	A	0.0939	0.1108	0.1046	0.0864	0.086	0.0955	0.0913	0.0927	0.1085	0.0811	0.0769	0.0828	0.0755	0.0893	0.0811	0.0859	0.0957	0.0936	0.1017	0.1009	0.0934
PC(22:0_20:4)	PC	diacyl	2567	[M+H]	PC(42:4)	(22:0_20:4)	(42:4)	865.656	20.963	C50 H92 N1 O8 P1	2	3	20	100	A	0.0417	0.0471	0.0477	0.0398	0.0402	0.0417	0.0378	0.0398	0.0421	0.037	0.0313	0.039	0.0382	0.0418	0.0384	0.0377	0.0443	0.0436	0.0455	0.0443	0.041
PC(24:1_18:2)	PC	diacyl	2574	[M+H]	PC(42:3)	(24:1_18:2)	(42:3)	867.672	21.032	C50 H94 N1 O8 P1	2	2	6	100	A	0.1353	0.1477	0.145	0.1188	0.1281	0.1361	0.1202	0.13	0.1447	0.1109	0.1056	0.1266	0.0983	0.1173	0.1063	0.1023	0.1387	0.1435	0.1333	0.1456	0.1316
PC(O-43:3)	PC	alkyl-acyl	2864	[M+H]	PC(O-43:3)	(O-43:3)	(O-43:3)	867.708	22.227	C51 H98 N1 O7 P1	1	1	0	100	C	0.0043	0.0042	0.0053	0.0045	0.0061	0.0053	0.0052	0.0046	0.0057	0.0052	0.0054	0.005	0.005	0.0056	0.0058	0.0048	0.0062	0.007	0.0053	0.0059	0.005
PC(24:0_18:2)	PC	diacyl	2580	[M+H]	PC(42:2)	(24:0_18:2)	(42:2)	869.687	21.779	C50 H96 N1 O8 P1	2	2	16	100	A	0.2005	0.2082	0.2243	0.2059	0.2033	0.2012	0.2123	0.2039	0.2366	0.1999	0.174	0.204	0.2113	0.2216	0.2116	0.1887	0.1956	0.201	0.2322	0.281	0.2476
PC(24:0_18:1)	PC	diacyl	2928	[M+H]	PC(42:1)	(24:0_18:1)	(42:1)	871.703	22.254	C50 H98 N1 O8 P1	2	2	15	66.7	A	0.0214	0.0277	0.026	0.0253	0.0246	0.0213	0.0281	0.0249	0.0243	0.0323	0.0301	0.0272	0.026	0.0286	0.027	0.0261	0.0279	0.0281	0.0303	0.0307	0.0277
PC(44:12)	PC	diacyl	2871	[M+H]	PC(44:12)	(44:12)	(44:12)	877.562	12.214	C52 H80 N1 O8 P1	1	1	1	100	C	0.0038	0.0047	0.0049	0.0044	0.0041	0.0044	0.0046	0.0042	0.0048	0.0043	0.0044	0.0042	0.0043	0.0039	0.004	0.0036	0.0046	0.0043	0.0052	0.0043	0.005
PC(43:4)	PC	diacyl	2878	[M+H]	PC(43:4)	(43:4)	(43:4)	879.672	21.34	C51 H94 N1 O8 P1	1	1	2	100	C	0.0086	0.0094	0.0092	0.0086	0.0086	0.0083	0.0086	0.0078	0.0089	0.0076	0.0072	0.0074	0.008	0.007	0.0066	0.0071	0.0087	0.0087	0.0091	0.0096	0.0096
PC(44:10)	PC	diacyl	2879	[M+H]	PC(44:10)	(44:10)	(44:10)	881.593	14.124	C52 H84 N1 O8 P1	1	1	2	100	C	0.0085	0.0102	0.0101	0.0094	0.0097	0.01	0.0109	0.0101	0.0114	0.0084	0.0085	0.0082	0.0106	0.0099	0.0092	0.0099	0.0089	0.0104	0.0102	0.011	0.0096
PC(26:8_18:0)	PC	diacyl	2887	[M+H]	PC(44:8)	(26:8_18:0)	(44:8)	885.625	16.391	C52 H88 N1 O8 P1	1	2	3	66.7	C	0.0053	0.0066	0.0082	0.0062	0.0065	0.006	0.0065	0.0065	0.0072	0.0069	0.0074	0.0058	0.0068	0.0066	0.0067	0.0062	0.0067	0.0069	0.0079	0.0081	0.0069
PC(44:8)	PC	diacyl	2888	[M+H]	PC(44:8)	(44:8)	(44:8)	885.625	16.977	C52 H88 N1 O8 P1	1	2	3	100	C	0.0201	0.0225	0.0225	0.021	0.0221	0.0215	0.0213	0.0234	0.0215	0.0214	0.019	0.0224	0.0196	0.0205	0.0212	0.0181	0.0228	0.0219	0.0236	0.0265	0.0232
PC(44:7)	PC	diacyl	2895	[M+H]	PC(44:7)	(44:7)	(44:7)	887.64	18.769	C52 H90 N1 O8 P1	1	2	2	100	C	0.01	0.0112	0.0103	0.0116	0.0093	0.0105	0.0083	0.0113	0.0095	0.0106	0.0104	0.0088	0.0076	0.0098	0.0101	0.0102	0.01	0.0076	0.0131	0.0124	0.013
PC(44:7)	PC	diacyl	2896	[M+H]	PC(44:7)	(44:7)	(44:7)	887.64	19.105	C52 H90 N1 O8 P1	1	2	2	66.7	C	0.0143	0.0154	0.0175	0.0131	0.0128	0.0125	0.0153	0.0153	0.0127	0.01	0.0105	0.011	0.0107	0.01	0.0084	0.0131	0.0146	0.014	0.0146	0.0131	0.014
PC(24:2_20:4)	PC	diacyl	2585	[M+H]	PC(44:6)	(24:2_20:4)	(44:6)	889.656	20.184	C52 H92 N1 O8 P1	2	2	4	100	A	0.0783	0.0895	0.0901	0.0857	0.0628	0.0808	0.0725	0.0692	0.0893	0.0653	0.0585	0.0659	0.0611	0.0725	0.0641	0.0662	0.0853	0.086	0.0736	0.0821	0.0749
PC(44:6)	PC	diacyl	2586	[M+H]	PC(44:6)	(44:6)	(44:6)	889.656	20.759	C52 H92 N1 O8 P1	1	2	4	100	C	0.0076	0.0074	0.008	0.0064	0.0072	0.0075	0.0071	0.0079	0.0078	0.0082	0.0062	0.0069	0.006	0.0078	0.0076	0.0076	0.0087	0.0064	0.0076	0.0084	0.0083
PC(24:1_20:4)	PC	diacyl	2588	[M+H]	PC(44:5)	(24:1_20:4)	(44:5)	891.672	20.906	C52 H94 N1 O8 P1	2	2	2	100	A	0.0773	0.0831	0.0842	0.0703	0.0726	0.0803	0.0566	0.0679	0.0668	0.0669	0.0641	0.0647	0.0644	0.0759	0.0718	0.074	0.0771	0.0828	0.0805	0.0806	0.0764
PC(44:5)	PC	diacyl	2591	[M+H]	PC(44:5)	(44:5)	(44:5)	891.672	21.244	C52 H94 N1 O8 P1	1	2	2	100	C	0.0122	0.0135	0.0139	0.0139	0.0139	0.0154	0.0199	0.0151	0.015	0.0134	0.0128	0.0166	0.0164	0.0124	0.0145	0.0122	0.0165	0.0161	0.0156	0.0223	0.0146
PC(45:11)	PC	diacyl	2902	[M+H]	PC(45:11)	(45:11)	(45:11)	893.593	12.24	C53 H84 N1 O8 P1	1	2	0	100	C	0.0044	0.0043	0.0047	0.0046	0.0043	0.0047	0.0046	0.0046	0.0048	0.0047	0.0047	0.0047	0.0041	0.0047	0.0044	0.0041	0.0049	0.0042	0.0054	0.0054	0.0054
PC(18:2_26:2)	PC	diacyl	2594	[M+H]	PC(44:4)	(18:2_26:2)	(44:4)	893.687	21.165	C52 H96 N1 O8 P1	2	3	3	100	A	0.0212	0.0249	0.0232	0.0192	0.0188	0.0225	0.0201	0.0189	0.0231	0.0232	0.0196	0.0181	0.0206	0.0168	0.0157	0.0181	0.0227	0.0192	0.0277	0.0233	0.0207
PC(24:0_20:4)	PC	diacyl	2595	[M+H]	PC(44:4)	(24:0_20:4)	(44:4)	893.687	21.621	C52 H96 N1 O8 P1	2	3	3	100	A	0.133	0.1378	0.1415	0.1211	0.1248	0.1346	0.1298	0.1361	0.1566	0.1144	0.1044	0.1232	0.1185	0.115	0.104	0.1139	0.1307	0.1342	0.1455	0.1597	0.1365
PC(O-45:3)	PC	alkyl-acyl	2907	[M+H]	PC(O-45:3)	(O-45:3)	(O-45:3)	895.739	22.226	C53 H102 N1 O7 P1	1	1	0	100	C	0.0541	0.0532	0.0616	0.0559	0.0609	0.0557	0.0627	0.0556	0.0615	0.0779	0.0722	0.0718	0.072	0.0644	0.0701	0.0519	0.0746	0.0679	0.0748	0.0649	0.0734
PC(O-46:3)	PC	alkyl-acyl	2908	[M+H]	PC(O-46:3)	(O-46:3)	(O-46:3)	909.755	22.233	C54 H104 N1 O7 P1	1	1	0	66.7	C	0.0023	0.0024	0.0022	0.0025	0.0022	0.0022	0.0023	0.0023	0.0026	0.0043	0.0029	0.0029	0.0031	0.0031	0.0035	0.0024	0.0027	0.0022	0.0032	0.0021	0.0037
PC(46:8)	PC	diacyl	2912	[M+H]	PC(46:8)	(46:8)	(46:8)	913.656	19.905	C54 H92 N1 O8 P1	1	1	0	100	C	0.0074	0.0071	0.0076	0.0073	0.008	0.0071	0.0081	0.0088	0.0088	0.0075	0.0069	0.0069	0.0069	0.007	0.0073	0.0071	0.0075	0.0075	0.0088	0.0092	0.0079
PC(46:7)	PC	diacyl	2918	[M+H]	PC(46:7)	(46:7)	(46:7)	915.672	20.713	C54 H94 N1 O8 P1	1	1	0	100	C	0.0085	0.0097	0.0091	0.0082	0.0071	0.0103	0.009	0.0107	0.0081	0.0089	0.0087	0.0098	0.0091	0.0076	0.0084	0.0081	0.0089	0.008	0.0095	0.0099	0.0103
PC(O-50:1)	PC	alkyl-acyl	2924	[M+H]	PC(O-50:1)	(O-50:1)	(O-50:1)	969.849	22.654	C58 H116 N1 O7 P1	1	1	0	100	C	0.0105	0.0097	0.0137	0.01	0.0091	0.0117	0.0099	0.01	0.01	0.0308	0.0216	0.0265	0.0198	0.0208	0.0192	0.0111	0.0123	0.0109	0.0139	0.0119	0.0122
PE(O-15:1_14:1)	PE	alkyl-acyl	743	[M+H]	PE(O-29:2)	(O-15:1_14:1)	(O-29:2)	631.458	20.406	C34 H66 N1 O7 P1	1	1	0	66.7	C	0.0448	0.0905	0.0356	0.0543	0.0633	0.0731	0.0667	0.0643	0.0824	0.0656	0.0444	0.0633	0.0483	0.0612	0.0539	0.053	0.033	0.0283	0.0508	0.0613	0.0488
PE(P-16:0_16:1)	PE	alkenyl-acyl	745	[M+H]	PE(P-32:1)	(P-16:0_16:1)	(P-32:1)	673.505	16.883	C37 H72 N1 O7 P1	1	1	0	100	B	0.0311	0.0349	0.0353	0.0307	0.036	0.0335	0.0296	0.0377	0.0365	0.0341	0.0327	0.0331	0.036	0.033	0.033	0.0329	0.0336	0.0361	0.0431	0.039	0.0376
PE(O-16:1_16:0) / PE(P-16:0_16:0)	PE	alkyl-acyl / alkenyl-acyl	317	[M+H]	PE(O-32:1)	(O-16:1_16:0)	(O-32:1)	675.52	19.235	C37 H74 N1 O7 P1	1	1	0	100	B	0.072	0.0702	0.0743	0.0598	0.0621	0.061	0.0794	0.0713	0.0853	0.0672	0.0594	0.0551	0.0568	0.0546	0.0621	0.0641	0.066	0.0729	0.0736	0.0732	0.0824
PE(16:0_16:1)	PE	diacyl	321	[M+H]	PE(32:1)	(16:0_16:1)	(32:1)	689.5	15.511	C37 H72 N1 O8 P1	2	1	3	100	A	0.0375	0.0464	0.0503	0.048	0.0532	0.0468	0.0411	0.0473	0.0456	0.0441	0.0426	0.0496	0.0393	0.047	0.0403	0.0491	0.0486	0.048	0.0497	0.0476	0.0457
PE(16:0_16:0)	PE	diacyl	324	[M+H]	PE(32:0)	(16:0_16:0)	(32:0)	691.515	17.7	C37 H74 N1 O8 P1	2	1	2	100	A	0.0215	0.0233	0.0378	0.0319	0.0183	0.0286	0.0397	0.0356	0.0428	0.0233	0.0283	0.0291	0.029	0.0231	0.0299	0.0247	0.0225	0.0362	0.0278	0.0254	0.0316
PE(O-14:1_20:4) / PE(P-14:0_20:4)	PE	alkyl-acyl / alkenyl-acyl	327	[M+H]	PE(O-34:5)	(O-14:1_20:4)	(O-34:5)	695.489	14.493	C39 H70 N1 O7 P1	1	1	0	100	B	0.0725	0.0747	0.0826	0.064	0.0742	0.0663	0.0816	0.0766	0.0846	0.0736	0.0622	0.0632	0.0664	0.0786	0.07	0.0702	0.0696	0.0731	0.0825	0.0757	0.076
PE(O-16:1_18:2) / PE(P-16:0_18:2)	PE	alkyl-acyl / alkenyl-acyl	329	[M+H]	PE(O-34:3)	(O-16:1_18:2)	(O-34:3)	699.52	17.494	C39 H74 N1 O7 P1	1	1	0	100	B	0.912	0.9687	0.9444	0.8413	0.9516	0.8868	1.0679	0.998	1.0332	0.8754	0.8579	0.9211	0.8	0.8368	0.8961	0.8466	0.8664	0.9768	0.9945	1.0623	1.0514
PE(P-16:0_18:1)	PE	alkenyl-acyl	766	[M+H]	PE(P-34:1)	(P-16:0_18:1)	(P-34:1)	701.536	19.454	C39 H76 N1 O7 P1	1	1	0	100	B	0.7402	0.8339	0.7998	0.7158	0.7403	0.7667	0.8446	0.7837	0.9067	0.7721	0.7625	0.7882	0.7187	0.7862	0.8035	0.7325	0.7465	0.7903	0.8841	0.8574	0.8552
PE(O-18:1_16:0) / PE(P-18:0_16:0)	PE	alkyl-acyl / alkenyl-acyl	335	[M+H]	PE(O-34:1)	(O-18:1_16:0)	(O-34:1)	703.552	20.561	C39 H78 N1 O7 P1	1	2	0	100	B	0.0327	0.0358	0.0367	0.0252	0.0282	0.0296	0.0345	0.0367	0.0383	0.0285	0.0248	0.0216	0.0269	0.026	0.028	0.0302	0.0301	0.0356	0.0322	0.0338	0.0302
PE(O-15:1_20:4) / PE(P-15:0_20:4)	PE	alkyl-acyl / alkenyl-acyl	338	[M+H]	PE(O-35:5)	(O-15:1_20:4)	(O-35:5)	709.505	15.762	C40 H72 N1 O7 P1	1	1	0	66.7	B	0.0478	0.0436	0.0481	0.0446	0.0529	0.051	0.0505	0.0476	0.0548	0.049	0.047	0.0479	0.045	0.0472	0.0419	0.0436	0.0445	0.0499	0.0482	0.0602	0.0524
PE(16:1_18:2)	PE	diacyl	347	[M+H]	PE(34:3)	(16:1_18:2)	(34:3)	713.5	13.959	C39 H72 N1 O8 P1	2	2	2	100	A	0.1631	0.1813	0.1798	0.1784	0.1977	0.1748	0.1907	0.1814	0.2009	0.1899	0.1777	0.1792	0.1677	0.1888	0.1721	0.1651	0.1639	0.1631	0.198	0.1948	0.1932
PE(16:0_18:3)	PE	diacyl	349	[M+H]	PE(34:3)	(16:0_18:3)	(34:3)	713.5	14.828	C39 H72 N1 O8 P1	2	2	4	100	A	0.0232	0.0275	0.0234	0.0245	0.0266	0.0317	0.0236	0.0202	0.0315	0.0215	0.0239	0.0258	0.0257	0.0277	0.0269	0.0308	0.0216	0.0348	0.0246	0.0321	0.0287
PE(16:0_18:2)	PE	diacyl	358	[M+H]	PE(34:2)	(16:0_18:2)	(34:2)	715.515	16.115	C39 H74 N1 O8 P1	2	2	3	100	A	4.8618	5.4241	5.4059	4.8361	5.2575	5.2917	5.945	5.2724	6.2206	5.2927	5.2019	5.0037	4.5976	5.083	5.1327	4.5759	4.7	5.3081	5.742	5.2584	5.7796
PE(16:0_18:1)	PE	diacyl	392	[M+H]	PE(34:1)	(16:0_18:1)	(34:1)	717.531	17.943	C39 H76 N1 O8 P1	2	1	4	100	A	1.8259	1.985	1.9151	1.7683	1.9784	1.8578	2.0378	1.9627	2.0324	1.7554	1.8018	1.8592	1.7515	1.7789	1.8279	1.7128	1.819	1.8966	2.0217	2.0005	2.0488
PE(16:0_18:0)	PE	diacyl	397	[M+H]	PE(34:0)	(16:0_18:0)	(34:0)	719.547	19.995	C39 H78 N1 O8 P1	2	1	3	100	A	0.058	0.0652	0.0558	0.0465	0.054	0.0517	0.0634	0.0638	0.0699	0.0537	0.0488	0.0353	0.0547	0.0465	0.053	0.0478	0.0515	0.0626	0.0566	0.0622	0.0555
PE(P-18:3_18:2)	PE	alkenyl-acyl	843	[M+H]	PE(P-36:5)	(P-18:3_18:2)	(P-36:5)	721.505	14.15	C41 H72 N1 O7 P1	1	3	0	100	B	0.0158	0.0155	0.0159	0.0155	0.0164	0.0149	0.0189	0.0168	0.0184	0.0176	0.0149	0.0144	0.0136	0.016	0.0138	0.0147	0.0138	0.0148	0.0162	0.019	0.0154
PE(P-16:1_20:4)	PE	alkenyl-acyl	844	[M+H]	PE(P-36:5)	(P-16:1_20:4)	(P-36:5)	721.505	14.825	C41 H72 N1 O7 P1	1	3	0	100	B	0.0356	0.0411	0.044	0.0426	0.0412	0.0432	0.0485	0.0398	0.0495	0.0379	0.0414	0.0373	0.0361	0.0424	0.0434	0.042	0.0347	0.0462	0.0462	0.0467	0.0497
PE(O-16:1_20:5) / PE(P-16:0_20:5)	PE	alkyl-acyl / alkenyl-acyl	400	[M+H]	PE(O-36:6)	(O-16:1_20:5)	(O-36:6)	721.505	15.421	C41 H72 N1 O7 P1	1	3	0	100	B	0.6588	0.7766	0.7442	0.7404	0.7898	0.8092	0.8274	0.7812	0.829	0.7708	0.7113	0.7799	0.6197	0.8168	0.7754	0.722	0.6938	0.7966	0.7922	0.8285	0.8289
PE(O-18:3_18:2) / PE(P-18:2_18:2)	PE	alkyl-acyl / alkenyl-acyl	405	[M+H]	PE(O-36:5)	(O-18:3_18:2)	(O-36:5)	723.52	15.794	C41 H74 N1 O7 P1	1	2	0	100	B	0.2246	0.2485	0.2212	0.2021	0.2218	0.2013	0.2236	0.2307	0.2551	0.2133	0.1885	0.2208	0.1998	0.2387	0.206	0.1707	0.2011	0.2278	0.252	0.2493	0.2611
PE(O-16:1_20:4) / PE(P-16:0_20:4)	PE	alkyl-acyl / alkenyl-acyl	406	[M+H]	PE(O-36:5)	(O-16:1_20:4)	(O-36:5)	723.52	17.087	C41 H74 N1 O7 P1	1	2	0	100	B	10.7679	11.6817	11.0133	10.124	11.4001	10.7857	11.897	10.9727	11.4363	10.961	10.3892	10.7109	10.6601	11.9834	11.1905	10.0467	10.5069	11.4087	12.605	12.2747	11.304
PE(O-18:2_18:2) / PE(P-18:1_18:2)	PE	alkyl-acyl / alkenyl-acyl	412	[M+H]	PE(O-36:4)	(O-18:2_18:2)	(O-36:4)	725.536	17.745	C41 H76 N1 O7 P1	1	2	0	100	B	0.4875	0.5458	0.5549	0.4455	0.5426	0.5041	0.5338	0.5121	0.5994	0.4651	0.4459	0.468	0.471	0.5345	0.4557	0.4927	0.4833	0.4938	0.499	0.5749	0.5446
PE(P-16:0_20:3)	PE	alkenyl-acyl	864	[M+H]	PE(P-36:3)	(P-16:0_20:3)	(P-36:3)	725.536	18.515	C41 H76 N1 O7 P1	1	2	0	100	B	0.1165	0.1302	0.1173	0.1008	0.1275	0.1217	0.1304	0.1131	0.1323	0.1064	0.1284	0.126	0.0874	0.1355	0.121	0.1032	0.113	0.1255	0.121	0.1327	0.1349
PE(O-18:1_18:2) / PE(P-18:0_18:2)	PE	alkyl-acyl / alkenyl-acyl	415	[M+H]	PE(O-36:3)	(O-18:1_18:2)	(O-36:3)	727.552	19.877	C41 H78 N1 O7 P1	1	1	0	100	B	0.3021	0.3613	0.3512	0.2716	0.3237	0.3091	0.3552	0.3262	0.3851	0.3266	0.2953	0.3048	0.3113	0.3113	0.3294	0.3053	0.3376	0.3249	0.3782	0.3653	0.3599
PE(17:0_18:2)	PE	diacyl	417	[M+H]	PE(35:2)	(17:0_18:2)	(35:2)	729.531	17.458	C40 H76 N1 O8 P1	2	1	2	100	A	0.1476	0.1525	0.1644	0.1439	0.1632	0.1629	0.1835	0.1709	0.1782	0.1568	0.16	0.1536	0.1335	0.1624	0.1523	0.1426	0.1475	0.1679	0.1866	0.1776	0.1905
PE(O-18:1_18:1) / PE(P-18:0_18:1)	PE	alkyl-acyl / alkenyl-acyl	420	[M+H]	PE(O-36:2)	(O-18:1_18:1)	(O-36:2)	729.567	20.628	C41 H80 N1 O7 P1	1	1	0	100	B	0.1654	0.1891	0.1771	0.1382	0.1492	0.1518	0.1755	0.1727	0.1919	0.1679	0.164	0.1592	0.1573	0.1562	0.1693	0.164	0.1646	0.172	0.1821	0.1916	0.1802
PE(17:0_18:1)	PE	diacyl	422	[M+H]	PE(35:1)	(17:0_18:1)	(35:1)	731.547	19.415	C40 H78 N1 O8 P1	2	1	4	100	A	0.0601	0.068	0.0633	0.0613	0.0593	0.0652	0.0691	0.0444	0.0784	0.0646	0.0687	0.0578	0.0464	0.0404	0.0648	0.0614	0.0672	0.068	0.0634	0.067	0.074
PE(16:1_20:5)	PE	diacyl	425	[M+H]	PE(36:6)	(16:1_20:5)	(36:6)	735.484	12.267	C41 H70 N1 O8 P1	2	2	2	100	A	0.0114	0.0118	0.0134	0.0127	0.014	0.0124	0.0138	0.0122	0.015	0.0144	0.0124	0.0129	0.0134	0.0143	0.011	0.0103	0.0109	0.012	0.0134	0.0143	0.0144
PE(36:6)	PE	diacyl	426	[M+H]	PE(36:6)	(36:6)	(36:6)	735.484	13.987	C41 H70 N1 O8 P1	1	2	10	66.7	C	0.0083	0.0104	0.0074	0.0084	0.0095	0.0098	0.0092	0.0076	0.0104	0.0091	0.008	0.0101	0.0082	0.0078	0.0088	0.0095	0.0088	0.0081	0.01	0.0096	0.0096
PE(P-17:1_20:4)	PE	alkenyl-acyl	888	[M+H]	PE(P-37:5)	(P-17:1_20:4)	(P-37:5)	735.52	16.035	C42 H74 N1 O7 P1	1	1	0	66.7	B	0.0256	0.0194	0.0219	0.0213	0.0212	0.0278	0.0264	0.0228	0.0245	0.0239	0.0201	0.0222	0.021	0.0214	0.0158	0.0207	0.0168	0.0255	0.0291	0.0232	0.032
PE(18:2_18:3)	PE	diacyl	430	[M+H]	PE(36:5)	(18:2_18:3)	(36:5)	737.5	12.997	C41 H72 N1 O8 P1	2	4	4	100	A	0.0356	0.0372	0.0361	0.0329	0.0383	0.036	0.0385	0.0397	0.043	0.0377	0.0387	0.0367	0.0291	0.0371	0.0331	0.0334	0.0346	0.0423	0.0488	0.0503	0.0454
PE(16:1_20:4)	PE	diacyl	431	[M+H]	PE(36:5)	(16:1_20:4)	(36:5)	737.5	13.656	C41 H72 N1 O8 P1	1	4	2	100	A	0.2005	0.2147	0.229	0.2122	0.2351	0.2407	0.2433	0.2287	0.2638	0.216	0.2188	0.2212	0.1998	0.2027	0.1895	0.1886	0.1894	0.2026	0.2366	0.2264	0.2351
PE(16:0_20:5)	PE	diacyl	432	[M+H]	PE(36:5)	(16:0_20:5)	(36:5)	737.5	14.22	C41 H72 N1 O8 P1	2	4	2	100	A	0.4663	0.4977	0.4802	0.4577	0.4931	0.4803	0.5175	0.4664	0.5543	0.4604	0.4875	0.4673	0.4221	0.4801	0.4679	0.4371	0.4179	0.4525	0.5311	0.5303	0.483
PE(O-17:1_20:4) / PE(P-17:0_20:4)	PE	alkyl-acyl / alkenyl-acyl	438	[M+H]	PE(O-37:5)	(O-17:1_20:4)	(O-37:5)	737.536	18.45	C42 H76 N1 O7 P1	1	1	0	100	B	0.1924	0.2176	0.2029	0.1868	0.2321	0.2007	0.2073	0.2334	0.228	0.184	0.1734	0.2013	0.1692	0.2194	0.19	0.2022	0.2005	0.2168	0.2336	0.2269	0.239
PE(18:2_18:2)	PE	diacyl	439	[M+H]	PE(36:4)	(18:2_18:2)	(36:4)	739.515	14.512	C41 H74 N1 O8 P1	2	3	2	100	A	0.751	0.807	0.7166	0.6683	0.7467	0.7212	0.8069	0.7386	0.8343	0.7227	0.6806	0.7468	0.6346	0.7777	0.6882	0.6705	0.6727	0.7012	0.8142	0.7431	0.7631
PE(16:0_20:4)	PE	diacyl	442	[M+H]	PE(36:4)	(16:0_20:4)	(36:4)	739.515	15.789	C41 H74 N1 O8 P1	2	3	2	100	A	6.1679	6.7395	6.3411	6.1737	6.6284	6.4907	6.7226	6.5684	7.4148	6.2266	6.1416	6.3367	5.7531	6.5856	5.8732	5.7662	6.0296	6.1164	7.1331	7.34	7.2946
PE(18:1_18:2)	PE	diacyl	449	[M+H]	PE(36:3)	(18:1_18:2)	(36:3)	741.531	16.407	C41 H76 N1 O8 P1	2	5	2	100	A	4.831	5.398	5.4113	5.1217	5.7867	5.351	5.8468	5.4834	6.2096	5.2396	5.0778	5.1487	4.4116	5.3329	5.1205	4.7149	4.8949	5.0021	6.0976	5.8327	5.561
PE(18:1_18:1)	PE	diacyl	458	[M+H]	PE(36:2)	(18:1_18:1)	(36:2)	743.547	18.401	C41 H78 N1 O8 P1	2	2	3	100	A	1.8011	2.0164	1.9288	1.868	2.0587	1.8218	1.9998	2.0062	2.091	1.8282	1.6381	1.86	1.7198	1.9028	1.9064	1.7062	1.917	1.7907	2.1609	2.0775	2.1553
PE(18:0_18:2)	PE	diacyl	459	[M+H]	PE(36:2)	(18:0_18:2)	(36:2)	743.547	18.821	C41 H78 N1 O8 P1	2	2	3	100	A	10.3543	10.6071	10.834	9.8767	10.3515	10.4534	10.9832	11.3918	12.0196	10.5066	10.6294	10.8452	9.7561	10.4805	9.887	9.6145	10.4844	10.3209	12.0531	11.6101	11.5045
PE(18:0_18:1)	PE	diacyl	468	[M+H]	PE(36:1)	(18:0_18:1)	(36:1)	745.562	20.119	C41 H80 N1 O8 P1	2	2	5	100	A	1.8693	1.979	1.9512	1.7573	1.9712	1.7518	2.1506	1.9008	2.1473	2.066	1.8883	1.9253	1.908	1.9074	2.0188	2.0161	1.8878	2.058	2.2844	2.131	2.1195
PE(O-18:3_20:4) / PE(P-18:2_20:4)	PE	alkyl-acyl / alkenyl-acyl	477	[M+H]	PE(O-38:7)	(O-18:3_20:4)	(O-38:7)	747.52	15.401	C43 H74 N1 O7 P1	1	3	0	100	B	0.8599	0.9591	0.9167	0.8156	0.944	0.8642	0.9729	0.7898	0.9512	0.8581	0.8542	0.8925	0.7875	0.9669	0.8	0.8844	0.8256	0.934	0.9491	0.9752	0.9226
PE(O-18:2_20:5) / PE(P-18:1_20:5)	PE	alkyl-acyl / alkenyl-acyl	478	[M+H]	PE(O-38:7)	(O-18:2_20:5)	(O-38:7)	747.52	15.699	C43 H74 N1 O7 P1	1	3	0	66.7	B	0.3638	0.4317	0.4333	0.4603	0.4042	0.4864	0.4977	0.4958	0.4866	0.4295	0.4135	0.3927	0.3571	0.4602	0.3897	0.3609	0.4023	0.42	0.4853	0.4537	0.5107
PE(O-16:1_22:6) / PE(P-16:0_22:6)	PE	alkyl-acyl / alkenyl-acyl	479	[M+H]	PE(O-38:7)	(O-16:1_22:6)	(O-38:7)	747.52	16.46	C43 H74 N1 O7 P1	1	3	0	100	B	6.2512	6.8821	6.9329	6.3725	7.189	6.8925	7.4626	7.1493	7.9877	6.431	6.5533	6.4504	5.8691	7.1558	6.6988	6.3177	6.4796	6.6746	7.7938	7.4298	7.3565
PE(15:0_22:6)	PE	diacyl	483	[M+H]	PE(37:6)	(15:0_22:6)	(37:6)	749.5	14.005	C42 H72 N1 O8 P1	1	1	6	66.7	C	0.0089	0.0087	0.009	0.0083	0.0099	0.0083	0.0093	0.0089	0.0115	0.0098	0.0089	0.0097	0.0088	0.0091	0.0092	0.009	0.0081	0.0107	0.0111	0.0103	0.0093
PE(O-18:2_20:4) / PE(P-18:1_20:4)	PE	alkyl-acyl / alkenyl-acyl	485	[M+H]	PE(O-38:6)	(O-18:2_20:4)	(O-38:6)	749.536	17.365	C43 H76 N1 O7 P1	1	3	0	100	B	5.3423	5.6636	5.7015	5.1857	5.6825	5.3901	6.2044	5.8039	5.9894	5.4539	5.5234	5.4508	4.9764	5.9359	5.463	5.2496	5.2986	5.7176	6.3451	6.2129	6.2021
PE(O-18:1_20:5) / PE(P-16:0_22:5)	PE	alkyl-acyl / alkenyl-acyl	487	[M+H]	PE(O-38:6)	(O-18:1_20:5)	(O-38:6)	749.536	18.133	C43 H76 N1 O7 P1	1	3	0	100	B	0.6203	0.6925	0.6822	0.5813	0.5724	0.6295	0.6329	0.6021	0.737	0.5541	0.6495	0.6181	0.5661	0.5993	0.4967	0.5682	0.6457	0.6172	0.7221	0.75	0.6661
PE(P-16:0_22:4)	PE	alkenyl-acyl	912	[M+H]	PE(P-38:4)	(P-16:0_22:4)	(P-38:4)	751.552	19.079	C43 H78 N1 O7 P1	1	3	0	100	B	0.1524	0.2253	0.1653	0.1229	0.1514	0.1439	0.1656	0.1527	0.1818	0.1758	0.2321	0.1346	0.2157	0.2066	0.1537	0.1534	0.1495	0.1585	0.2003	0.2189	0.2201
PE(17:0_20:4)	PE	diacyl	495	[M+H]	PE(37:4)	(17:0_20:4)	(37:4)	753.531	16.728	C42 H76 N1 O8 P1	1	1	14	100	C	0.0171	0.0175	0.0188	0.0142	0.0171	0.0216	0.0238	0.0204	0.0195	0.019	0.0152	0.0138	0.019	0.0173	0.0183	0.0176	0.0182	0.0175	0.0238	0.0199	0.0152
PE(17:0_20:4)	PE	diacyl	496	[M+H]	PE(37:4)	(17:0_20:4)	(37:4)	753.531	17.122	C42 H76 N1 O8 P1	2	1	2	100	A	0.1807	0.176	0.1812	0.1619	0.1936	0.1833	0.1997	0.1801	0.1921	0.1758	0.1706	0.1744	0.1794	0.1916	0.1794	0.1623	0.1782	0.1776	0.2154	0.202	0.1876
PE(O-18:0_20:4) / PE(P-18:2_20:1)	PE	alkyl-acyl / alkenyl-acyl	498	[M+H]	PE(O-38:4)	(O-18:0_20:4)	(O-38:4)	753.567	19.907	C43 H80 N1 O7 P1	1	1	0	66.7	B	0.0942	0.1094	0.1043	0.0744	0.085	0.0786	0.098	0.0997	0.1138	0.0889	0.0984	0.0785	0.0792	0.091	0.0879	0.0833	0.0847	0.089	0.1012	0.102	0.1004
PE(O-20:1_18:2) / PE(P-20:0_18:2)	PE	alkyl-acyl / alkenyl-acyl	509	[M+H]	PE(O-38:3)	(O-20:1_18:2)	(O-38:3)	755.583	20.828	C43 H82 N1 O7 P1	1	1	0	100	B	0.0305	0.0407	0.0373	0.027	0.0254	0.0303	0.0355	0.0323	0.0355	0.0327	0.0359	0.0318	0.0398	0.031	0.0338	0.0319	0.036	0.028	0.0364	0.0375	0.0444
PE(19:0_18:2)	PE	diacyl	513	[M+H]	PE(37:2)	(19:0_18:2)	(37:2)	757.562	19.846	C42 H80 N1 O8 P1	1	1	2	100	A	0.0953	0.0884	0.0816	0.1231	0.069	0.0732	0.0839	0.0748	0.1016	0.0834	0.08	0.0864	0.0947	0.066	0.0968	0.0899	0.0965	0.0962	0.1248	0.0795	0.1009
PE(16:1_22:6)	PE	diacyl	526	[M+H]	PE(38:7)	(16:1_22:6)	(38:7)	761.5	13.158	C43 H72 N1 O8 P1	2	2	2	100	A	0.1275	0.1146	0.1141	0.1015	0.1452	0.1088	0.1456	0.138	0.1334	0.0986	0.1342	0.1357	0.1096	0.1127	0.1099	0.0934	0.1158	0.1055	0.1542	0.1242	0.1313
PE(18:2_20:4)	PE	diacyl	532	[M+H]	PE(38:6)	(18:2_20:4)	(38:6)	763.515	14.211	C43 H74 N1 O8 P1	2	4	2	100	A	0.3784	0.4146	0.4127	0.3555	0.4244	0.3891	0.4	0.3797	0.4655	0.3751	0.3874	0.3792	0.3472	0.3862	0.3785	0.3515	0.3557	0.3698	0.4305	0.4369	0.4294
PE(16:0_22:6)	PE	diacyl	535	[M+H]	PE(38:6)	(16:0_22:6)	(38:6)	763.515	15.239	C43 H74 N1 O8 P1	2	4	2	100	A	3.6543	3.898	3.709	3.345	4.1342	3.6218	4.0998	3.9086	4.3916	3.9276	3.8733	3.9052	3.2249	3.7307	3.3916	3.5387	3.5549	3.487	4.0235	3.7273	3.9564
PE(18:1_20:4)	PE	diacyl	546	[M+H]	PE(38:5)	(18:1_20:4)	(38:5)	765.531	16.066	C43 H76 N1 O8 P1	2	3	2	100	A	5.8785	5.9519	5.9434	5.6561	6.1483	5.9791	6.612	6.0742	6.8771	6.0543	5.8866	5.6332	5.4826	6.305	6.0904	5.5533	5.4571	5.8962	6.6366	5.8517	6.386
PE(18:0_20:5)	PE	diacyl	548	[M+H]	PE(38:5)	(18:0_20:5)	(38:5)	765.531	16.807	C43 H76 N1 O8 P1	2	3	2	100	A	1.0248	1.1543	1.1841	1.0786	1.2763	1.1185	1.1863	1.2653	1.3394	1.1357	1.1025	1.1998	1.0865	1.2163	1.1295	1.0493	1.1262	1.2116	1.3442	1.282	1.3334
PE(20:4_18:1)	PE	diacyl	552	[M+H]	PE(38:5)	(20:4_18:1)	(38:5)	765.531	18.814	C43 H76 N1 O8 P1	1	3	2	66.7	B	0.1702	0.1666	0.1337	0.1452	0.1834	0.1746	0.15	0.1713	0.1887	0.1609	0.1017	0.1631	0.1519	0.2031	0.1736	0.1743	0.1747	0.1715	0.1849	0.166	0.1736
PE(18:1_20:3)	PE	diacyl	558	[M+H]	PE(38:4)	(18:1_20:3)	(38:4)	767.547	17.15	C43 H78 N1 O8 P1	2	6	3	66.7	A	0.14	0.1703	0.1616	0.1567	0.1685	0.1492	0.1801	0.1742	0.1548	0.1522	0.139	0.1403	0.1356	0.1568	0.179	0.129	0.1424	0.1257	0.1775	0.1682	0.152
PE(20:3_18:1)	PE	diacyl	560	[M+H]	PE(38:4)	(20:3_18:1)	(38:4)	767.547	17.427	C43 H78 N1 O8 P1	1	6	3	100	A	0.0324	0.0348	0.0513	0.0391	0.0351	0.053	0.046	0.0642	0.0497	0.0402	0.0434	0.0558	0.0316	0.0441	0.0381	0.0412	0.0467	0.0402	0.0496	0.0469	0.0633
PE(18:0_20:4)	PE	diacyl	564	[M+H]	PE(38:4)	(18:0_20:4)	(38:4)	767.547	18.474	C43 H78 N1 O8 P1	2	6	3	100	A	13.7721	15.0028	14.7517	14.1072	15.6135	14.1636	15.4076	15.3436	15.9441	13.4065	12.5524	13.7262	12.5756	15.2308	13.4109	13.4502	14.4961	14.3103	15.907	16.1281	16.0295
PE(P-18:3_22:6)	PE	alkenyl-acyl	932	[M+H]	PE(P-40:9)	(P-18:3_22:6)	(P-40:9)	769.505	13.257	C45 H72 N1 O7 P1	1	1	0	100	B	0.0196	0.0213	0.0211	0.0188	0.0216	0.0212	0.0244	0.0239	0.0281	0.0191	0.0213	0.0231	0.0214	0.0217	0.0209	0.0194	0.0183	0.021	0.0255	0.025	0.0263
PE(P-18:3_22:6)	PE	alkenyl-acyl	933	[M+H]	PE(P-40:9)	(P-18:3_22:6)	(P-40:9)	769.505	16.507	C45 H72 N1 O7 P1	1	1	0	100	B	0.1007	0.1028	0.091	0.0967	0.1134	0.0972	0.0932	0.0977	0.1064	0.1023	0.0979	0.1034	0.0885	0.1099	0.0911	0.0976	0.0946	0.1036	0.1059	0.1121	0.093
PE(18:0_20:3)	PE	diacyl	575	[M+H]	PE(38:3)	(18:0_20:3)	(38:3)	769.562	19.47	C43 H80 N1 O8 P1	2	1	2	100	A	0.7988	0.915	0.8659	0.8061	0.7983	0.8453	0.8932	0.8613	0.9003	0.8622	0.755	0.8088	0.8003	0.9931	0.9384	0.7488	0.7883	0.9038	0.9563	0.9238	0.8346
PE(18:0_20:3)	PE	diacyl	578	[M+H]	PE(38:3)	(18:0_20:3)	(38:3)	769.562	19.926	C43 H80 N1 O8 P1	2	1	2	100	A	0.0808	0.0851	0.0997	0.0826	0.1032	0.068	0.1028	0.0734	0.0948	0.0767	0.0764	0.088	0.078	0.0751	0.0708	0.0576	0.0703	0.0892	0.1034	0.0974	0.0986
PE(O-18:3_22:6) / PE(P-18:2_22:6)	PE	alkyl-acyl / alkenyl-acyl	582	[M+H]	PE(O-40:9)	(O-18:3_22:6)	(O-40:9)	771.52	14.826	C45 H74 N1 O7 P1	1	1	0	100	B	0.4022	0.4597	0.4726	0.4205	0.4552	0.4574	0.4868	0.4513	0.5319	0.4121	0.4154	0.4374	0.4094	0.4934	0.4365	0.427	0.3831	0.4636	0.5148	0.5132	0.5202
PE(18:0_20:2)	PE	diacyl	600	[M+H]	PE(38:2)	(18:0_20:2)	(38:2)	771.578	20.277	C43 H82 N1 O8 P1	2	1	3	100	A	0.3708	0.4026	0.3635	0.3252	0.3541	0.3178	0.3671	0.3585	0.4056	0.348	0.3108	0.3562	0.315	0.3604	0.3563	0.3373	0.352	0.3527	0.3938	0.3958	0.3798
PE(P-18:2_22:5)	PE	alkenyl-acyl	941	[M+H]	PE(P-40:7)	(P-18:2_22:5)	(P-40:7)	773.536	15.632	C45 H76 N1 O7 P1	1	1	0	100	B	0.0347	0.0473	0.0372	0.0359	0.0394	0.0343	0.045	0.0405	0.0301	0.0313	0.033	0.0351	0.033	0.0358	0.0318	0.0279	0.0371	0.0416	0.0369	0.0364	0.0353
PE(18:0_20:1)	PE	diacyl	611	[M+H]	PE(38:1)	(18:0_20:1)	(38:1)	773.593	20.896	C43 H84 N1 O8 P1	2	1	2	100	A	0.0899	0.1073	0.0935	0.0769	0.0797	0.0786	0.0821	0.098	0.0833	0.0924	0.0794	0.0872	0.0794	0.0827	0.0947	0.0858	0.093	0.0999	0.0976	0.1038	0.0974
PE(P-18:1_22:5)	PE	alkenyl-acyl	945	[M+H]	PE(P-40:6)	(P-18:1_22:5)	(P-40:6)	775.552	17.58	C45 H78 N1 O7 P1	1	3	0	100	B	0.1408	0.2011	0.1837	0.1558	0.1634	0.1842	0.1636	0.1549	0.214	0.1829	0.1561	0.1639	0.1548	0.1813	0.1711	0.1571	0.1325	0.1516	0.1514	0.1853	0.1912
PE(O-18:1_22:6) / PE(P-18:0_22:6)	PE	alkyl-acyl / alkenyl-acyl	615	[M+H]	PE(O-40:7)	(O-18:1_22:6)	(O-40:7)	775.552	19.185	C45 H78 N1 O7 P1	1	3	0	100	B	1.5443	1.7634	1.6702	1.4625	1.6775	1.6131	1.7205	1.6419	1.8042	1.572	1.668	1.6098	1.5235	1.7332	1.501	1.4867	1.5948	1.5938	1.8589	1.8349	1.8184
PE(17:0_22:6)	PE	diacyl	617	[M+H]	PE(39:6)	(17:0_22:6)	(39:6)	777.531	16.526	C44 H76 N1 O8 P1	2	1	2	100	A	0.0827	0.0809	0.0706	0.0674	0.0844	0.0776	0.0929	0.0865	0.0943	0.0801	0.0813	0.0792	0.0675	0.0889	0.072	0.0748	0.0756	0.0762	0.0899	0.0911	0.092
PE(O-18:1_22:5) / PE(P-18:0_22:5)	PE	alkyl-acyl / alkenyl-acyl	619	[M+H]	PE(O-40:6)	(O-18:1_22:5)	(O-40:6)	777.567	19.742	C45 H80 N1 O7 P1	1	1	0	100	B	0.3567	0.4387	0.3656	0.326	0.3532	0.3277	0.3991	0.3588	0.3961	0.3315	0.3623	0.3419	0.3187	0.3746	0.35	0.2973	0.3171	0.353	0.3935	0.3882	0.4001
PE(O-18:1_22:5)	PE	alkyl-acyl	620	[M+H]	PE(O-40:6)	(O-18:1_22:5)	(O-40:6)	777.567	20.15	C45 H80 N1 O7 P1	1	1	0	100	B	0.0813	0.1072	0.0991	0.084	0.0947	0.0818	0.1139	0.099	0.103	0.097	0.0923	0.097	0.0831	0.0889	0.1007	0.0734	0.0854	0.0952	0.1146	0.1066	0.0912
PE(O-18:0_22:5)	PE	alkyl-acyl	624	[M+H]	PE(O-40:5)	(O-18:0_22:5)	(O-40:5)	779.583	19.987	C45 H82 N1 O7 P1	1	3	0	100	A	0.0397	0.0396	0.0333	0.0311	0.0357	0.0343	0.039	0.0329	0.0375	0.0343	0.0377	0.0359	0.0345	0.041	0.038	0.032	0.0298	0.0302	0.0428	0.038	0.0438
PE(P-18:0_22:4)	PE	alkenyl-acyl	954	[M+H]	PE(P-40:4)	(P-18:0_22:4)	(P-40:4)	779.583	20.461	C45 H82 N1 O7 P1	1	2	0	66.7	B	0.0759	0.1299	0.0901	0.0917	0.0815	0.0679	0.1035	0.0891	0.1089	0.0876	0.088	0.0692	0.0816	0.1014	0.0651	0.0651	0.0684	0.0851	0.0885	0.1018	0.0958
PE(P-20:0_20:4)	PE	alkenyl-acyl	955	[M+H]	PE(P-40:4)	(P-20:0_20:4)	(P-40:4)	779.583	20.702	C45 H82 N1 O7 P1	1	2	0	100	B	0.3172	0.3518	0.3343	0.2896	0.304	0.2803	0.327	0.3366	0.3476	0.334	0.3275	0.3016	0.3109	0.3186	0.3091	0.2698	0.3058	0.3262	0.3553	0.3973	0.3548
PE(18:3_22:6)	PE	diacyl	634	[M+H]	PE(40:9)	(18:3_22:6)	(40:9)	785.5	12.228	C45 H72 N1 O8 P1	2	1	4	100	A	0.0209	0.0225	0.0214	0.0212	0.0227	0.022	0.0253	0.0228	0.0245	0.0233	0.0239	0.0218	0.0223	0.0271	0.0247	0.0196	0.0206	0.0201	0.0245	0.0256	0.0241
PE(18:2_22:6)	PE	diacyl	637	[M+H]	PE(40:8)	(18:2_22:6)	(40:8)	787.515	13.679	C45 H74 N1 O8 P1	2	3	2	100	A	0.3579	0.4011	0.4051	0.3606	0.4173	0.3899	0.4131	0.3903	0.4627	0.4024	0.3915	0.3623	0.3661	0.3711	0.348	0.351	0.3438	0.3782	0.4196	0.4286	0.4246
PE(22:6_18:2)	PE	diacyl	639	[M+H]	PE(40:8)	(22:6_18:2)	(40:8)	787.515	16.814	C45 H74 N1 O8 P1	1	3	2	100	B	0.0339	0.0376	0.0373	0.0332	0.038	0.0393	0.0411	0.0362	0.0438	0.0379	0.0364	0.0371	0.0308	0.0381	0.0326	0.0372	0.0366	0.038	0.0375	0.0421	0.0359
PE(18:1_22:5)	PE	diacyl	654	[M+H]	PE(40:6)	(18:1_22:5)	(40:6)	791.547	16.292	C45 H78 N1 O8 P1	2	3	0	100	A	0.257	0.2885	0.2825	0.239	0.2802	0.276	0.2828	0.265	0.2867	0.2759	0.2645	0.2967	0.2342	0.2829	0.2654	0.2511	0.2447	0.2389	0.3156	0.2848	0.2935
PE(18:1_22:5)	PE	diacyl	656	[M+H]	PE(40:6)	(18:1_22:5)	(40:6)	791.547	17.174	C45 H78 N1 O8 P1	2	3	0	100	A	0.1257	0.1997	0.1398	0.1305	0.1825	0.1447	0.0948	0.1418	0.1405	0.1515	0.1587	0.0826	0.1397	0.1864	0.1412	0.1631	0.1816	0.1565	0.1649	0.1522	0.1524
PE(18:0_22:6)	PE	diacyl	657	[M+H]	PE(40:6)	(18:0_22:6)	(40:6)	791.547	17.874	C45 H78 N1 O8 P1	2	3	2	100	A	2.816	3.1483	3.0322	2.8262	3.2391	3.1175	3.1587	2.8072	3.3114	2.7331	2.7625	2.8746	2.6519	2.8987	2.8783	2.6914	2.88	2.9295	3.087	3.129	3.057
PE(18:0_22:5)	PE	diacyl	663	[M+H]	PE(40:5)	(18:0_22:5)	(40:5)	793.562	18.684	C45 H80 N1 O8 P1	2	2	0	100	A	0.7827	0.8639	0.85	0.7406	0.8233	0.7945	0.8603	0.8496	0.9005	0.8171	0.8014	0.82	0.6869	0.842	0.7829	0.7275	0.7513	0.7663	0.9095	0.8942	0.9821
PE(18:0_22:5)	PE	diacyl	665	[M+H]	PE(40:5)	(18:0_22:5)	(40:5)	793.562	19.484	C45 H80 N1 O8 P1	2	2	0	100	A	0.2713	0.3219	0.3043	0.295	0.2943	0.3034	0.3137	0.3048	0.3543	0.3184	0.2899	0.3096	0.2536	0.3275	0.3144	0.266	0.2766	0.2802	0.3431	0.3278	0.3263
PE(18:0_22:4)	PE	diacyl	668	[M+H]	PE(40:4)	(18:0_22:4)	(40:4)	795.578	19.933	C45 H82 N1 O8 P1	2	2	2	100	A	0.3537	0.3898	0.3375	0.3033	0.3457	0.3126	0.3669	0.3352	0.3989	0.3699	0.3468	0.334	0.3177	0.3468	0.3342	0.3064	0.2851	0.3217	0.3807	0.3927	0.3819
PE(20:0_20:4)	PE	diacyl	670	[M+H]	PE(40:4)	(20:0_20:4)	(40:4)	795.578	20.259	C45 H82 N1 O8 P1	2	2	2	100	A	0.0609	0.0633	0.0401	0.0438	0.0373	0.0476	0.0641	0.0554	0.0525	0.0441	0.0398	0.0477	0.0401	0.0589	0.0605	0.0539	0.0547	0.0489	0.0538	0.0624	0.0678
PE(P-20:3_22:6)	PE	alkenyl-acyl	957	[M+H]	PE(P-42:9)	(P-20:3_22:6)	(P-42:9)	797.536	19.193	C47 H76 N1 O7 P1	1	2	0	66.7	B	0.08	0.0829	0.0692	0.0597	0.0705	0.069	0.078	0.0793	0.0767	0.0484	0.0429	0.0508	0.0356	0.0527	0.0495	0.0629	0.0666	0.074	0.0666	0.0665	0.0559
PE(22:0_18:2)	PE	diacyl	675	[M+H]	PE(40:2)	(22:0_18:2)	(40:2)	799.609	21.099	C45 H86 N1 O8 P1	1	1	2	100	A	0.0235	0.0288	0.0331	0.0283	0.0198	0.0253	0.0277	0.027	0.0299	0.0336	0.021	0.0348	0.0213	0.0197	0.0254	0.0223	0.0278	0.0333	0.0221	0.027	0.0239
PE(19:0_22:6)	PE	diacyl	679	[M+H]	PE(41:6)	(19:0_22:6)	(41:6)	805.562	19.243	C46 H80 N1 O8 P1	1	1	2	100	B	0.0414	0.0351	0.0403	0.0211	0.0331	0.0216	0.0346	0.0382	0.0406	0.0477	0.0343	0.0284	0.0206	0.0291	0.0283	0.037	0.0353	0.0356	0.0325	0.04	0.041
PE(O-22:2_20:4) / PE(P-22:1_20:4)	PE	alkyl-acyl / alkenyl-acyl	680	[M+H]	PE(O-42:6)	(O-22:2_20:4)	(O-42:6)	805.599	20.685	C47 H84 N1 O7 P1	1	1	0	100	B	0.0676	0.0858	0.0715	0.0583	0.0684	0.065	0.0732	0.0692	0.076	0.0709	0.0638	0.0647	0.0631	0.071	0.0747	0.0622	0.0669	0.0713	0.0788	0.0828	0.0754
PE(O-22:1_20:4)	PE	alkyl-acyl	683	[M+H]	PE(O-42:5)	(O-22:1_20:4)	(O-42:5)	807.614	21.32	C47 H86 N1 O7 P1	1	1	0	100	B	0.0157	0.0164	0.0145	0.0122	0.014	0.0135	0.0156	0.0163	0.0171	0.017	0.0157	0.0151	0.015	0.0143	0.0167	0.0154	0.0158	0.0156	0.0142	0.0175	0.0151
PE(42:11)	PE	diacyl	989	[M+H]	PE(42:11)	(42:11)	(42:11)	809.5	13.695	C47 H72 N1 O8 P1	1	1	2	66.7	C	0.0125	0.0159	0.0155	0.0173	0.0217	0.0162	0.0155	0.0202	0.0179	0.0161	0.0182	0.0175	0.0108	0.0182	0.0144	0.0154	0.0148	0.0164	0.0181	0.0204	0.0143
PE(20:4_22:6)	PE	diacyl	691	[M+H]	PE(42:10)	(20:4_22:6)	(42:10)	811.515	13.252	C47 H74 N1 O8 P1	2	1	2	100	A	0.0256	0.0251	0.0265	0.0232	0.026	0.0251	0.0262	0.0253	0.0309	0.0221	0.0235	0.023	0.0219	0.0279	0.0249	0.0213	0.024	0.0236	0.0279	0.0279	0.0295
PE(20:1_22:6)	PE	diacyl	697	[M+H]	PE(42:7)	(20:1_22:6)	(42:7)	817.562	17.956	C47 H80 N1 O8 P1	2	1	2	100	A	0.074	0.0761	0.0769	0.07	0.0804	0.0735	0.0912	0.0749	0.0698	0.0706	0.0742	0.0733	0.0632	0.0714	0.0676	0.0581	0.0676	0.0768	0.0788	0.074	0.0653
PE(20:0_22:6)	PE	diacyl	699	[M+H]	PE(42:6)	(20:0_22:6)	(42:6)	819.578	20.02	C47 H82 N1 O8 P1	1	1	2	100	A	0.0122	0.0143	0.0144	0.0137	0.0117	0.0146	0.0169	0.0123	0.0177	0.0146	0.0128	0.013	0.013	0.0134	0.0113	0.0114	0.0107	0.012	0.0151	0.0145	0.0141
PE(22:0_20:4)	PE	diacyl	708	[M+H]	PE(42:4)	(22:0_20:4)	(42:4)	823.609	21.032	C47 H86 N1 O8 P1	1	3	2	100	A	0.03	0.0383	0.0354	0.0232	0.0295	0.0294	0.0298	0.0308	0.0303	0.0274	0.0341	0.0333	0.0252	0.0234	0.0304	0.026	0.0261	0.0372	0.0332	0.0328	0.0306
PE(24:1_18:2)	PE	diacyl	711	[M+H]	PE(42:3)	(24:1_18:2)	(42:3)	825.625	21.072	C47 H88 N1 O8 P1	1	1	0	100	A	0.0525	0.0614	0.0632	0.0487	0.06	0.0531	0.0556	0.0574	0.0696	0.0504	0.0529	0.0552	0.0499	0.0632	0.0621	0.0525	0.0618	0.0627	0.0682	0.0631	0.0633
PE(24:0_18:2)	PE	diacyl	717	[M+H]	PE(42:2)	(24:0_18:2)	(42:2)	827.64	21.605	C47 H90 N1 O8 P1	2	2	0	100	A	0.0817	0.0725	0.0816	0.0556	0.0654	0.064	0.0662	0.0836	0.089	0.0733	0.0587	0.0738	0.0595	0.0687	0.092	0.0859	0.0734	0.082	0.1021	0.1028	0.0968
PE(O-22:2_22:6)	PE	alkyl-acyl	719	[M+H]	PE(O-44:8)	(O-22:2_22:6)	(O-44:8)	829.599	20.473	C49 H84 N1 O7 P1	1	1	0	100	B	0.0111	0.012	0.011	0.0108	0.0098	0.0092	0.0113	0.0098	0.0119	0.0099	0.0104	0.0108	0.0088	0.0133	0.0102	0.0098	0.0083	0.0114	0.011	0.0108	0.0109
PE(24:0_18:1)	PE	diacyl	722	[M+H]	PE(42:1)	(24:0_18:1)	(42:1)	829.656	21.937	C47 H92 N1 O8 P1	1	1	1	66.7	A	0.0194	0.0223	0.0178	0.0116	0.0158	0.0131	0.012	0.0161	0.0196	0.0219	0.0223	0.0207	0.0194	0.0123	0.0209	0.0176	0.0218	0.0219	0.0247	0.0219	0.0239
PE(O-24:3_20:4)	PE	alkyl-acyl	724	[M+H]	PE(O-44:7)	(O-24:3_20:4)	(O-44:7)	831.614	20.78	C49 H86 N1 O7 P1	1	1	0	66.7	B	0.0174	0.0171	0.0154	0.0132	0.0105	0.0118	0.0154	0.0151	0.0155	0.0196	0.0175	0.0177	0.014	0.0155	0.0177	0.0159	0.017	0.015	0.0193	0.0178	0.0151
PE(O-24:2_20:4)	PE	alkyl-acyl	728	[M+H]	PE(O-44:6)	(O-24:2_20:4)	(O-44:6)	833.63	21.278	C49 H88 N1 O7 P1	1	1	0	100	B	0.0257	0.0335	0.0282	0.0229	0.0273	0.0238	0.0286	0.0277	0.0296	0.027	0.0284	0.0279	0.0275	0.028	0.0309	0.028	0.0255	0.0259	0.0322	0.0326	0.03
PE(22:6_22:6)	PE	diacyl	1039	[M+H]	PE(44:12)	(22:6_22:6)	(44:12)	835.515	12.773	C49 H74 N1 O8 P1	1	1	1	66.7	A	0.008	0.0096	0.0081	0.0083	0.0091	0.008	0.0102	0.0081	0.0096	0.0084	0.0082	0.0074	0.0087	0.0093	0.0083	0.0075	0.0076	0.008	0.0085	0.0096	0.0096
PE(24:2_20:4)	PE	diacyl	729	[M+H]	PE(44:6)	(24:2_20:4)	(44:6)	847.609	20.375	C49 H86 N1 O8 P1	1	1	0	100	A	0.0439	0.0467	0.0424	0.0382	0.0346	0.0427	0.0395	0.0393	0.0442	0.0385	0.0372	0.038	0.0319	0.0409	0.0385	0.0385	0.0361	0.04	0.0482	0.045	0.0394
PE(24:1_20:4)	PE	diacyl	732	[M+H]	PE(44:5)	(24:1_20:4)	(44:5)	849.625	20.982	C49 H88 N1 O8 P1	1	1	0	100	A	0.0573	0.0599	0.0591	0.0452	0.0644	0.0543	0.0578	0.0493	0.0641	0.0472	0.0477	0.0546	0.054	0.0522	0.0556	0.0493	0.0529	0.0614	0.0666	0.0608	0.0507
PE(24:0_20:4)	PE	diacyl	737	[M+H]	PE(44:4)	(24:0_20:4)	(44:4)	851.64	21.526	C49 H90 N1 O8 P1	2	1	0	100	A	0.0824	0.0861	0.0821	0.071	0.0726	0.0709	0.0759	0.0788	0.095	0.0699	0.0745	0.0695	0.0694	0.0756	0.0694	0.0699	0.072	0.0878	0.0788	0.0919	0.0875
PG(16:0_18:2)	PG	diacyl	480	[M+NH4]	PG(34:2)	(16:0_18:2)	(34:2)	746.51	13.841	C40 H75 O10 P1	2	1	2	100	A	0.0887	0.0833	0.0788	0.0948	0.0831	0.0895	0.0886	0.0844	0.0896	0.096	0.0758	0.0847	0.0754	0.0974	0.0808	0.0794	0.0891	0.0712	0.1007	0.0845	0.0957
PG(16:0_18:1)	PG	diacyl	691	[M+NH4]	PG(34:1)	(16:0_18:1)	(34:1)	748.525	15.415	C40 H77 O10 P1	2	1	4	100	A	0.2093	0.2195	0.2111	0.2205	0.2379	0.2322	0.2144	0.2133	0.2025	0.2613	0.2351	0.2584	0.1823	0.209	0.1952	0.2024	0.2072	0.2184	0.2324	0.2436	0.2121
PG(18:2_18:2)	PG	diacyl	491	[M+NH4]	PG(36:4)	(18:2_18:2)	(36:4)	770.51	12.503	C42 H75 O10 P1	2	3	1	100	A	0.029	0.0267	0.026	0.0283	0.0239	0.0239	0.0423	0.033	0.0381	0.0297	0.0243	0.0218	0.0252	0.0319	0.0317	0.0296	0.0293	0.0286	0.0322	0.031	0.0386
PG(16:0_20:4)	PG	diacyl	492	[M+NH4]	PG(36:4)	(16:0_20:4)	(36:4)	770.51	13.562	C42 H75 O10 P1	2	3	2	100	A	0.0255	0.0329	0.0353	0.0301	0.0316	0.0262	0.0432	0.0269	0.0383	0.0132	0.0172	0.0248	0.0285	0.019	0.0158	0.0287	0.0279	0.0341	0.029	0.026	0.0374
PG(18:0_18:2)	PG	diacyl	513	[M+NH4]	PG(36:2)	(18:0_18:2)	(36:2)	774.541	16.24	C42 H79 O10 P1	1	2	2	100	A	0.0781	0.0861	0.0952	0.0791	0.0843	0.0639	0.1221	0.0762	0.091	0.0793	0.0733	0.0744	0.1037	0.0857	0.0807	0.0861	0.0884	0.0903	0.0909	0.0899	0.1122
PG(18:0_18:1)	PG	diacyl	524	[M+NH4]	PG(36:1)	(18:0_18:1)	(36:1)	776.557	17.974	C42 H81 O10 P1	2	1	2	100	A	0.0352	0.0468	0.0469	0.0505	0.0519	0.0531	0.0487	0.0549	0.0504	0.0289	0.0289	0.0174	0.0436	0.0506	0.0592	0.0543	0.0533	0.0629	0.0786	0.0537	0.0546
PG(O-19:4_21:3)	PG	alkyl-acyl	713	[M+NH4]	PG(O-40:7)	(O-19:4_21:3)	(O-40:7)	806.546	6.968	C46 H79 O9 P1	1	1	0	100	C	0.0517	0.0549	0.0555	0.0462	0.047	0.0478	0.0512	0.0417	0.0547	0.0225	0.0282	0.0265	0.0373	0.0366	0.0328	0.0348	0.0355	0.0412	0.0377	0.0328	0.0359
PG(18:2_22:6)	PG	diacyl	534	[M+NH4]	PG(40:8)	(18:2_22:6)	(40:8)	818.51	10.844	C46 H75 O10 P1	2	1	2	100	A	0.097	0.1038	0.1099	0.0987	0.087	0.0949	0.1071	0.0926	0.1151	0.1473	0.1365	0.1407	0.0965	0.1316	0.1105	0.1121	0.1166	0.118	0.1338	0.1338	0.1537
PG(18:1_22:6)	PG	diacyl	545	[M+NH4]	PG(40:7)	(18:1_22:6)	(40:7)	820.525	12.16	C46 H77 O10 P1	2	2	2	100	A	0.0206	0.0243	0.0218	0.0186	0.0183	0.0198	0.0222	0.0215	0.0216	0.0284	0.0237	0.0238	0.0248	0.0287	0.0265	0.0209	0.0204	0.0234	0.027	0.0228	0.0302
PG(20:4_22:6)	PG	diacyl	567	[M+NH4]	PG(42:10)	(20:4_22:6)	(42:10)	842.51	10.646	C48 H75 O10 P1	2	1	2	100	A	0.1437	0.1565	0.1448	0.1719	0.1238	0.1099	0.1411	0.15	0.1529	0.1662	0.1668	0.1569	0.1344	0.1665	0.1563	0.1468	0.1416	0.1636	0.1707	0.1745	0.1609
PG(22:6_22:6)	PG	diacyl	592	[M+NH4]	PG(44:12)	(22:6_22:6)	(44:12)	866.51	10.325	C50 H75 O10 P1	3	1	1	100	A	0.4308	0.5062	0.4687	0.5114	0.4569	0.4653	0.5434	0.5194	0.5429	0.7137	0.6336	0.6604	0.5308	0.6172	0.5177	0.5031	0.5476	0.5551	0.5533	0.58	0.6411
PG(22:5_22:6)	PG	diacyl	604	[M+NH4]	PG(44:11)	(22:5_22:6)	(44:11)	868.525	10.811	C50 H77 O10 P1	2	1	0	100	B	0.0841	0.091	0.1057	0.0842	0.0739	0.0761	0.1032	0.0827	0.1057	0.1236	0.1235	0.1177	0.0835	0.1138	0.093	0.0863	0.0926	0.1014	0.1117	0.1141	0.1094
PG(22:5_22:6)	PG	diacyl	606	[M+NH4]	PG(44:11)	(22:5_22:6)	(44:11)	868.525	11.369	C50 H77 O10 P1	2	1	0	100	B	0.1043	0.1103	0.1095	0.1185	0.1122	0.0963	0.1174	0.1041	0.1155	0.2198	0.1762	0.194	0.1351	0.1625	0.137	0.138	0.1795	0.1566	0.1436	0.1434	0.1679
PG(22:4_22:6)	PG	diacyl	615	[M+NH4]	PG(44:10)	(22:4_22:6)	(44:10)	870.541	11.93	C50 H79 O10 P1	2	2	2	100	A	0.0206	0.0221	0.0232	0.02	0.0183	0.0186	0.0247	0.023	0.0209	0.0294	0.0283	0.0318	0.0228	0.0293	0.0216	0.0189	0.0264	0.0226	0.0206	0.0227	0.0289
SM(d21:0)	SM	acyl	834	[M+H]	SM(d21:0)	(d21:0)	(d21:0)	522.38	5.085	C26 H55 N2 O6 P1	1	1	0	100	C	0.0144	0.0198	0.0255	0.0111	0.0151	0.0176	0.0243	0.0252	0.0203	0.0199	0.0143	0.0131	0.0143	0.0145	0.017	0.0132	0.0158	0.0155	0.0265	0.0164	0.0202
SM(d22:4)	SM	acyl	837	[M+H]	SM(d22:4)	(d22:4)	(d22:4)	528.333	8.837	C27 H49 N2 O6 P1	1	1	0	100	C	0.0001	1e-07	1e-07	0.0011	0.001	0.0006	1e-07	0.0002	1e-07	0.0104	0.0089	0.0091	0.0085	0.0061	0.0085	0.0009	0.001	0.0007	0.0043	0.0046	0.0045
SM(d32:1)	SM	acyl	282	[M+H]	SM(d32:1)	(d32:1)	(d32:1)	674.536	12.08	C37 H75 N2 O6 P1	2	1	2	100	C	0.0277	0.0301	0.028	0.0287	0.0287	0.0289	0.0311	0.0312	0.0346	0.0293	0.0282	0.0273	0.0266	0.028	0.0272	0.0259	0.0292	0.0259	0.0323	0.0374	0.0318
SM(d33:1)	SM	acyl	286	[M+H]	SM(d33:1)	(d33:1)	(d33:1)	688.552	13.213	C38 H77 N2 O6 P1	2	1	2	100	C	0.0907	0.0911	0.0835	0.0803	0.0848	0.0839	0.0891	0.093	0.1162	0.0668	0.0724	0.0669	0.074	0.0778	0.0783	0.0796	0.0958	0.0905	0.0987	0.111	0.1035
SM(d34:2)	SM	acyl	298	[M+H]	SM(d34:2)	(d34:2)	(d34:2)	700.552	12.457	C39 H77 N2 O6 P1	2	1	3	100	C	0.2805	0.3045	0.2904	0.2703	0.2911	0.2821	0.2825	0.2917	0.3226	0.2814	0.2753	0.2682	0.2479	0.2844	0.2591	0.2607	0.2853	0.2771	0.3151	0.375	0.3267
SM(d34:1)	SM	acyl	403	[M+H]	SM(d34:1)	(d34:1)	(d34:1)	702.568	14.32	C39 H79 N2 O6 P1	2	1	3	100	C	9.0947	10.0055	8.6679	8.2937	8.8784	8.8095	9.0395	9.9574	10.9108	8.4575	8.5275	8.1455	8.0482	8.6776	8.6166	8.3818	9.1617	9.001	10.0025	11.4056	9.7318
SM(d34:0)	SM	acyl	455	[M+H]	SM(d34:0)	(d34:0)	(d34:0)	704.583	15.264	C39 H81 N2 O6 P1	2	1	2	100	C	0.0307	0.043	0.0315	0.0251	0.026	0.0258	0.0281	0.0319	0.0414	0.0256	0.0231	0.0236	0.0253	0.0266	0.0231	0.0297	0.026	0.0287	0.0359	0.0334	0.032
SM(d35:1)	SM	acyl	462	[M+H]	SM(d35:1)	(d35:1)	(d35:1)	716.583	15.6	C40 H81 N2 O6 P1	2	1	2	100	C	0.0587	0.0669	0.0567	0.0524	0.049	0.0541	0.0605	0.0573	0.0647	0.0562	0.0557	0.0493	0.0463	0.052	0.0512	0.0539	0.0592	0.0577	0.0653	0.0684	0.0645
SM(d36:5)	SM	acyl	841	[M+H]	SM(d36:5)	(d36:5)	(d36:5)	722.536	12.449	C41 H75 N2 O6 P1	1	1	0	100	C	0.0249	0.0206	0.0257	0.0245	0.0264	0.0269	0.0196	0.0208	0.0207	0.0218	0.0214	0.0204	0.016	0.0151	0.0171	0.0202	0.02	0.0196	0.0217	0.0259	0.0225
SM(d36:4)	SM	acyl	847	[M+H]	SM(d36:4)	(d36:4)	(d36:4)	724.552	14.368	C41 H77 N2 O6 P1	1	1	0	100	C	0.2303	0.2465	0.1994	0.2209	0.2132	0.2162	0.2217	0.2585	0.2471	0.2353	0.2078	0.2367	0.2085	0.2262	0.2083	0.2614	0.2831	0.2302	0.2576	0.276	0.2427
SM(d36:2)	SM	acyl	482	[M+H]	SM(d36:2)	(d36:2)	(d36:2)	728.583	14.837	C41 H81 N2 O6 P1	2	1	5	100	C	0.0883	0.1105	0.0984	0.0922	0.0943	0.0945	0.0996	0.092	0.119	0.0909	0.09	0.0886	0.086	0.1017	0.0967	0.0891	0.0933	0.0946	0.105	0.1293	0.1169
SM(d36:2)	SM	acyl	483	[M+H]	SM(d36:2)	(d36:2)	(d36:2)	728.583	15.146	C41 H81 N2 O6 P1	1	1	5	100	C	0.013	0.0226	0.0135	0.0147	0.0133	0.0122	0.0159	0.0161	0.0225	0.0153	0.0146	0.0141	0.0144	0.0115	0.0129	0.0194	0.0135	0.0162	0.0168	0.0214	0.0142
SM(d36:1)	SM	acyl	493	[M+H]	SM(d36:1)	(d36:1)	(d36:1)	730.599	16.986	C41 H83 N2 O6 P1	2	1	3	100	C	0.846	1.0255	0.8019	0.771	0.8416	0.7976	0.8587	0.9032	0.9496	0.7585	0.7496	0.7015	0.7574	0.7793	0.773	0.8045	0.8892	0.8349	0.9345	1.0207	0.9054
SM(d37:2)	SM	acyl	854	[M+H]	SM(d37:2)	(d37:2)	(d37:2)	742.599	16.161	C42 H83 N2 O6 P1	1	1	0	66.7	C	0.011	0.0135	0.012	0.0117	0.0097	0.0112	0.0107	0.0126	0.015	0.0096	0.0099	0.0098	0.0105	0.0093	0.0116	0.0089	0.0118	0.0123	0.0156	0.0103	0.0131
SM(d37:1)	SM	acyl	520	[M+H]	SM(d37:1)	(d37:1)	(d37:1)	744.615	18.497	C42 H85 N2 O6 P1	2	1	2	100	C	0.1395	0.1521	0.1375	0.1175	0.136	0.1249	0.1269	0.1409	0.1535	0.0984	0.0917	0.0914	0.0814	0.094	0.0905	0.1112	0.1348	0.1252	0.1319	0.1394	0.1292
SM(d38:2)	SM	acyl	530	[M+H]	SM(d38:2)	(d38:2)	(d38:2)	756.615	17.556	C43 H85 N2 O6 P1	2	1	3	100	C	0.2341	0.2672	0.2348	0.2309	0.2131	0.2465	0.2485	0.2594	0.2973	0.2437	0.2107	0.2286	0.2284	0.2372	0.2111	0.2106	0.2217	0.2328	0.257	0.3011	0.2844
SM(d38:2)	SM	acyl	532	[M+H]	SM(d38:2)	(d38:2)	(d38:2)	756.615	17.923	C43 H85 N2 O6 P1	1	1	3	100	C	0.034	0.0318	0.0217	0.0364	0.0384	0.029	0.0398	0.0253	0.0369	0.0299	0.032	0.0346	0.0325	0.0343	0.0334	0.0366	0.034	0.0398	0.041	0.0398	0.0341
SM(d38:1)	SM	acyl	538	[M+H]	SM(d38:1)	(d38:1)	(d38:1)	758.63	19.659	C43 H87 N2 O6 P1	2	1	2	100	C	1.7329	1.9158	1.7758	1.6743	1.7011	1.5861	1.837	1.8695	2.0683	1.4694	1.4221	1.1846	1.2948	1.3419	1.3646	1.5375	1.6918	1.7551	1.7832	2.0083	1.8185
SM(d39:2)	SM	acyl	882	[M+H]	SM(d39:2)	(d39:2)	(d39:2)	770.63	19.035	C44 H87 N2 O6 P1	1	1	1	100	C	0.023	0.0317	0.0251	0.0233	0.0213	0.0222	0.0236	0.0298	0.0311	0.0222	0.0206	0.0211	0.0211	0.02	0.0208	0.0244	0.0248	0.0281	0.0297	0.0288	0.0283
SM(d39:1)	SM	acyl	550	[M+H]	SM(d39:1)	(d39:1)	(d39:1)	772.646	20.398	C44 H89 N2 O6 P1	2	1	5	100	C	0.1585	0.1652	0.1514	0.1187	0.134	0.1318	0.141	0.1464	0.1695	0.1091	0.1099	0.0939	0.0987	0.0972	0.1072	0.1186	0.133	0.1396	0.1411	0.1589	0.1429
SM(d40:4)	SM	acyl	913	[M+H]	SM(d40:4)	(d40:4)	(d40:4)	780.615	19.72	C45 H85 N2 O6 P1	1	1	0	100	C	0.0279	0.029	0.0253	0.023	0.0253	0.025	0.0278	0.0308	0.0292	0.0219	0.0202	0.0184	0.0173	0.023	0.0203	0.0273	0.0261	0.0297	0.0258	0.0288	0.0254
SM(d40:3)	SM	acyl	562	[M+H]	SM(d40:3)	(d40:3)	(d40:3)	782.63	17.607	C45 H87 N2 O6 P1	2	1	1	100	C	0.0297	0.0309	0.0278	0.0242	0.029	0.0319	0.0312	0.0341	0.0355	0.0287	0.0278	0.0285	0.0244	0.0291	0.027	0.0294	0.0315	0.031	0.0296	0.0327	0.0342
SM(d40:2)	SM	acyl	577	[M+H]	SM(d40:2)	(d40:2)	(d40:2)	784.646	19.669	C45 H89 N2 O6 P1	2	2	3	100	C	0.0819	0.0923	0.0834	0.0734	0.08	0.0773	0.0932	0.0934	0.1007	0.0829	0.0772	0.0765	0.073	0.081	0.0739	0.0852	0.0975	0.0878	0.0924	0.1101	0.1029
SM(d18:2_22:0)	SM	acyl	578	[M+H]	SM(d40:2)	(d18:2_22:0)	(d40:2)	784.646	19.988	C45 H89 N2 O6 P1	2	2	3	100	A	0.6182	0.6941	0.6332	0.6166	0.6353	0.6133	0.6626	0.6829	0.7743	0.5961	0.5559	0.5596	0.5859	0.6003	0.5918	0.6584	0.665	0.6723	0.7065	0.8422	0.6982
SM(d40:1)	SM	acyl	588	[M+H]	SM(d40:1)	(d40:1)	(d40:1)	786.661	20.833	C45 H91 N2 O6 P1	2	1	2	100	C	2.9761	3.2099	2.9501	2.7651	2.8185	2.6556	2.6896	3.0779	3.1691	2.0553	2.0272	1.6444	1.9939	2.2088	2.1527	2.3761	2.6289	2.8923	2.8145	3.2148	2.8344
SM(d41:6)	SM	acyl	964	[M+H]	SM(d41:6)	(d41:6)	(d41:6)	790.599	18.038	C46 H83 N2 O6 P1	1	1	0	66.7	C	0.0121	0.015	0.0161	0.0134	0.0184	0.017	0.0164	0.0181	0.0188	0.0128	0.0138	0.0144	0.0141	0.0162	0.0136	0.0122	0.0178	0.0173	0.017	0.019	0.0163
SM(d41:2)	SM	acyl	598	[M+H]	SM(d41:2)	(d41:2)	(d41:2)	798.661	20.362	C46 H91 N2 O6 P1	2	2	2	100	C	0.0651	0.0682	0.0606	0.0514	0.0583	0.0553	0.0561	0.0545	0.0642	0.0492	0.0495	0.0495	0.0512	0.0531	0.0497	0.0489	0.0657	0.0619	0.0621	0.0739	0.0574
SM(d18:1_23:1)	SM	acyl	599	[M+H]	SM(d41:2)	(d18:1_23:1)	(d41:2)	798.661	20.614	C46 H91 N2 O6 P1	2	2	2	100	C	0.1617	0.1794	0.1633	0.1617	0.1497	0.1552	0.1613	0.168	0.1781	0.1682	0.1595	0.1482	0.158	0.1616	0.1625	0.1686	0.1858	0.1678	0.193	0.2359	0.1987
SM(d18:1_23:0)	SM	acyl	619	[M+H]	SM(d41:1)	(d18:1_23:0)	(d41:1)	800.677	21.301	C46 H93 N2 O6 P1	2	2	3	100	A	0.815	0.824	0.7813	0.7004	0.7081	0.6914	0.7701	0.8348	0.9328	0.5445	0.5031	0.4225	0.5045	0.5124	0.5291	0.5803	0.6531	0.7073	0.7409	0.8388	0.7311
SM(d18:1_24:3)	SM	acyl	689	[M+H]	SM(d42:4)	(d18:1_24:3)	(d42:4)	808.646	20.811	C47 H89 N2 O6 P1	1	2	0	100	C	0.0216	0.022	0.0221	0.0201	0.0181	0.0193	0.0199	0.0215	0.024	0.0101	0.0119	0.0103	0.0145	0.015	0.0176	0.0187	0.0226	0.0253	0.0228	0.0249	0.0188
SM(d42:3)	SM	acyl	697	[M+H]	SM(d42:3)	(d42:3)	(d42:3)	810.661	19.916	C47 H91 N2 O6 P1	2	1	1	100	C	2.1048	2.1515	2.0824	1.8422	2.0527	1.8911	2.1259	2.2019	2.4801	1.9342	1.8323	1.838	1.8037	1.8939	1.8738	2.0122	2.1596	2.1105	2.3425	2.6434	2.357
SM(d42:2)	SM	acyl	716	[M+H]	SM(d42:2)	(d42:2)	(d42:2)	812.677	20.764	C47 H93 N2 O6 P1	2	1	2	100	C	5.384	5.7398	5.1808	5.0268	4.9828	5.1513	4.9871	5.7493	6.1979	5.0552	4.9314	4.7857	4.8246	5.191	4.8551	5.3981	6.1398	5.5669	6.1912	6.9363	6.326
SM(d42:1)	SM	acyl	737	[M+H]	SM(d42:1)	(d42:1)	(d42:1)	814.693	21.637	C47 H95 N2 O6 P1	2	2	2	100	C	5.8945	5.4365	5.7612	5.1913	5.3954	5.2594	5.446	6.3459	6.9584	3.359	3.5406	2.9743	3.6138	3.6499	3.555	3.9088	4.1602	5.153	5.326	6.4237	5.3439
SM(d43:4)	SM	acyl	931	[M+H]	SM(d43:4)	(d43:4)	(d43:4)	822.661	21.316	C48 H91 N2 O6 P1	1	1	0	100	C	0.0231	0.0236	0.0229	0.0183	0.0193	0.0187	0.0214	0.0233	0.0245	0.0117	0.0108	0.0095	0.0107	0.0096	0.0112	0.0146	0.0176	0.02	0.0166	0.0204	0.0181
SM(d43:2)	SM	acyl	761	[M+H]	SM(d43:2)	(d43:2)	(d43:2)	826.693	21.251	C48 H95 N2 O6 P1	2	1	3	100	C	0.0442	0.0527	0.0526	0.0475	0.0467	0.0452	0.0534	0.048	0.0578	0.0396	0.0351	0.0331	0.036	0.0372	0.0409	0.0392	0.0478	0.047	0.0532	0.0638	0.0479
SM(d43:1)	SM	acyl	778	[M+H]	SM(d43:1)	(d43:1)	(d43:1)	828.708	22.074	C48 H97 N2 O6 P1	2	1	4	100	C	0.1404	0.1294	0.1376	0.1223	0.123	0.1211	0.1389	0.1523	0.1654	0.1199	0.0771	0.0804	0.0695	0.0954	0.0948	0.0911	0.1009	0.1196	0.1247	0.1437	0.1348
SM(d44:6)	SM	acyl	936	[M+H]	SM(d44:6)	(d44:6)	(d44:6)	832.646	19.905	C49 H89 N2 O6 P1	1	1	0	100	C	0.0556	0.0506	0.0516	0.0435	0.044	0.0463	0.0506	0.0523	0.0561	0.0432	0.0431	0.042	0.0441	0.0496	0.0461	0.053	0.0591	0.0561	0.0546	0.0614	0.0518
SM(d44:5)	SM	acyl	947	[M+H]	SM(d44:5)	(d44:5)	(d44:5)	834.661	20.761	C49 H91 N2 O6 P1	1	1	0	100	C	0.0815	0.0874	0.0776	0.0767	0.0804	0.0801	0.0747	0.0948	0.0876	0.0735	0.0693	0.0732	0.0733	0.0817	0.0754	0.0926	0.1091	0.0925	0.0969	0.1023	0.0876
SM(d44:5)	SM	acyl	949	[M+H]	SM(d44:5)	(d44:5)	(d44:5)	834.661	21.167	C49 H91 N2 O6 P1	1	1	0	100	C	0.0306	0.0298	0.0272	0.023	0.0248	0.0256	0.0269	0.0271	0.0307	0.0203	0.0182	0.0236	0.0179	0.0216	0.0178	0.0255	0.0329	0.0332	0.0275	0.0334	0.0211
SM(d44:4)	SM	acyl	957	[M+H]	SM(d44:4)	(d44:4)	(d44:4)	836.677	21.654	C49 H93 N2 O6 P1	1	1	0	100	C	0.1054	0.1016	0.0902	0.0737	0.0814	0.0858	0.0802	0.0915	0.0978	0.0425	0.0421	0.0285	0.0461	0.0531	0.0474	0.0744	0.0915	0.0995	0.0731	0.0814	0.0738
SM(d44:3)	SM	acyl	783	[M+H]	SM(d44:3)	(d44:3)	(d44:3)	838.693	20.966	C49 H95 N2 O6 P1	2	1	0	100	C	0.0656	0.0595	0.061	0.0519	0.0569	0.0579	0.0515	0.0654	0.067	0.0491	0.0496	0.0503	0.0522	0.0561	0.0576	0.0575	0.0688	0.0704	0.0636	0.0718	0.0647
SM(d44:2)	SM	acyl	792	[M+H]	SM(d44:2)	(d44:2)	(d44:2)	840.708	21.556	C49 H97 N2 O6 P1	2	1	1	100	C	0.1049	0.1016	0.0957	0.0909	0.0991	0.0949	0.0948	0.1107	0.1185	0.0797	0.071	0.0837	0.0792	0.0847	0.0776	0.0867	0.1018	0.1046	0.1136	0.1244	0.1113
SM(d44:1)	SM	acyl	800	[M+H]	SM(d44:1)	(d44:1)	(d44:1)	842.724	22.517	C49 H99 N2 O6 P1	2	1	3	100	C	0.0638	0.0492	0.0444	0.0573	0.0678	0.062	0.0509	0.0709	0.0774	0.0689	0.0787	0.0645	0.0525	0.0427	0.0503	0.0564	0.0552	0.0779	0.0848	0.0693	0.0643
SPH(d16:0)	SPH	Sphinganine	1145	[M+H]	SPH(d16:0)	(d16:0)	(d16:0)	273.267	2.384	C16 H35 N1 O2	2	1	0	100	C	0.0887	0.0914	0.0949	0.2479	0.2208	0.2527	0.1598	0.169	0.1581	0.452	0.4568	0.5417	0.0557	0.0709	0.0656	0.1786	0.1845	0.1909	0.2077	0.2111	0.2116
TG(O-13:0_3:0_16:0)	TG	alkyl-acyl	357	[M+NH4]	TG(O-32:0)	(O-13:0_3:0_16:0)	(O-32:0)	568.507	20.886	C35 H68 O5	2	3	0	100	B	1.7534	3.3309	2.6873	1.1583	1.3265	1.1457	1.3197	1.6784	1.8675	1.8952	1.9416	2.0443	1.1539	1.2245	1.1417	0.9501	0.692	1.0674	1.5757	1.4935	1.567
TG(O-15:0_18:0_3:0)	TG	alkyl-acyl	454	[M+NH4]	TG(O-36:0)	(O-15:0_18:0_3:0)	(O-36:0)	624.569	21.87	C39 H76 O5	1	2	0	100	B	0.19	0.2727	0.3198	0.1212	0.1264	0.0997	0.1507	0.1647	0.2775	0.7727	0.7745	0.8563	0.3007	0.2616	0.2712	0.1004	0.0891	0.1238	0.3022	0.34	0.3675
TG(4:0_16:0_18:1)	TG	triacyl	490	[M+NH4]	TG(38:1)	(4:0_16:0_18:1)	(38:1)	664.564	21.808	C41 H76 O6	1	1	0	100	A	0.0036	0.0144	0.0062	0.0038	0.0084	0.0046	0.0039	0.0053	0.0071	0.0034	0.0056	0.0033	0.0026	0.0044	0.0027	0.0039	0.0024	0.004	0.0046	0.0044	0.0047
TG(12:0_12:0_14:0)	TG	triacyl	494	[M+NH4]	TG(38:0)	(12:0_12:0_14:0)	(38:0)	666.58	22.035	C41 H78 O6	1	1	1	100	A	0.0047	0.0157	0.0121	0.0073	0.0092	0.0054	0.0071	0.0093	0.0089	0.0131	0.0145	0.0147	0.0088	0.0137	0.0107	0.0058	0.0045	0.0059	0.009	0.0099	0.01
TG(3:0_18:0_18:0)	TG	triacyl	525	[M+NH4]	TG(39:0)	(3:0_18:0_18:0)	(39:0)	680.595	22.356	C42 H80 O6	1	1	0	100	B	1e-07	0.0001	0.0002	0.0004	0.0004	0.0002	0.0001	0.0001	0.0001	0.0092	0.0082	0.0097	0.0022	0.0022	0.0018	0.0002	0.0003	0.0002	0.0024	0.0024	0.0028
TG(6:0_16:0_18:2)	TG	triacyl	528	[M+NH4]	TG(40:2)	(6:0_16:0_18:2)	(40:2)	690.58	21.827	C43 H78 O6	1	1	0	100	A	0.0048	0.0121	0.0037	0.0039	0.0094	0.0047	0.0038	0.0059	0.0074	0.0042	0.0074	0.0041	0.0032	0.0029	0.0027	0.0035	0.0031	0.0049	0.0042	0.0056	0.0051
TG(10:0_14:0_16:0)	TG	triacyl	533	[M+NH4]	TG(40:0)	(10:0_14:0_16:0)	(40:0)	694.611	22.364	C43 H82 O6	1	2	0	66.7	A	0.004	0.0111	0.0086	0.0055	0.0073	0.0042	0.0053	0.0069	0.0068	0.0087	0.0094	0.0085	0.0062	0.01	0.0074	0.0047	0.0035	0.0053	0.0072	0.0075	0.0076
TG(10:0_14:0_18:1)	TG	triacyl	538	[M+NH4]	TG(42:1)	(10:0_14:0_18:1)	(42:1)	720.627	22.368	C45 H84 O6	1	2	0	66.7	A	0.003	0.0095	0.0036	0.0036	0.0066	0.0024	0.0027	0.0032	0.0034	0.0052	0.005	0.003	0.0026	0.0043	0.0029	0.0027	0.0023	0.0046	0.0038	0.0042	0.0044
TG(12:0_14:0_16:0)	TG	triacyl	546	[M+NH4]	TG(42:0)	(12:0_14:0_16:0)	(42:0)	722.642	22.65	C45 H86 O6	1	1	1	100	A	0.0054	0.0112	0.0084	0.0084	0.0113	0.0074	0.006	0.0074	0.009	0.017	0.0142	0.014	0.0087	0.0134	0.01	0.0075	0.005	0.0073	0.0108	0.0119	0.0114
TG(12:0_14:0_18:2)	TG	triacyl	555	[M+NH4]	TG(44:2)	(12:0_14:0_18:2)	(44:2)	746.642	22.406	C47 H86 O6	1	1	1	66.7	B	0.0084	0.0195	0.0069	0.0114	0.0192	0.0066	0.0066	0.0094	0.0095	0.0162	0.017	0.0091	0.0067	0.0072	0.0062	0.0069	0.0068	0.0139	0.0123	0.0117	0.0121
TG(14:0_14:0_16:0)	TG	triacyl	582	[M+NH4]	TG(44:0)	(14:0_14:0_16:0)	(44:0)	750.674	22.953	C47 H90 O6	1	1	1	100	A	0.0261	0.0389	0.0297	0.0419	0.0555	0.0406	0.0331	0.0366	0.0378	0.0593	0.0622	0.0603	0.0414	0.0496	0.0495	0.0348	0.0289	0.0307	0.0499	0.0483	0.0447
TG(14:0_15:0_16:0)	TG	triacyl	600	[M+NH4]	TG(45:0)	(14:0_15:0_16:0)	(45:0)	764.689	23.101	C48 H92 O6	1	1	1	100	A	0.0058	0.0201	0.0102	0.0087	0.01	0.0081	0.007	0.0088	0.0089	0.0113	0.0106	0.0119	0.0097	0.0147	0.0118	0.0082	0.0078	0.0089	0.0119	0.0123	0.0122
TG(12:0_16:1_18:1)	TG	triacyl	605	[M+NH4]	TG(46:2)	(12:0_16:1_18:1)	(46:2)	774.674	22.697	C49 H90 O6	1	1	1	100	A	0.0308	0.0615	0.0229	0.0442	0.0761	0.0336	0.0251	0.0357	0.0386	0.071	0.0719	0.0505	0.0284	0.0312	0.0326	0.0312	0.031	0.0503	0.0497	0.0503	0.0526
TG(14:0_16:0_16:1)	TG	triacyl	612	[M+NH4]	TG(46:1)	(14:0_16:0_16:1)	(46:1)	776.689	22.955	C49 H92 O6	1	1	1	100	A	0.0364	0.0725	0.0321	0.0558	0.0953	0.0515	0.0358	0.0463	0.0526	0.0819	0.0821	0.0676	0.0395	0.0512	0.0522	0.0452	0.0362	0.0518	0.0621	0.0668	0.0608
TG(14:0_16:0_16:0)	TG	triacyl	615	[M+NH4]	TG(46:0)	(14:0_16:0_16:0)	(46:0)	778.705	23.139	C49 H94 O6	1	1	1	66.7	A	0.1787	0.1983	0.1768	0.2091	0.2314	0.2498	0.2098	0.2462	0.2688	0.1888	0.2035	0.1808	0.16	0.1691	0.1642	0.1664	0.1515	0.1718	0.1997	0.1986	0.1998
TG(14:0_15:0_18:2)	TG	triacyl	631	[M+NH4]	TG(47:2)	(14:0_15:0_18:2)	(47:2)	788.689	22.851	C50 H92 O6	1	1	1	100	A	0.0043	0.0275	0.007	0.0054	0.0089	0.0045	0.0034	0.0055	0.0054	0.0067	0.0072	0.0056	0.0057	0.0079	0.0058	0.0065	0.0042	0.0064	0.0079	0.0081	0.0082
TG(15:0_16:0_16:1)	TG	triacyl	644	[M+NH4]	TG(47:1)	(15:0_16:0_16:1)	(47:1)	790.705	23.099	C50 H94 O6	1	2	1	66.7	A	0.0059	0.031	0.0088	0.0082	0.0123	0.0068	0.0068	0.0083	0.0093	0.0096	0.009	0.0091	0.0075	0.012	0.0089	0.0106	0.008	0.0096	0.0124	0.0122	0.0131
TG(14:1_16:1_18:1)	TG	triacyl	654	[M+NH4]	TG(48:3)	(14:1_16:1_18:1)	(48:3)	800.689	22.698	C51 H92 O6	1	3	1	100	A	0.0575	0.1119	0.0448	0.0766	0.1259	0.0674	0.049	0.0682	0.0759	0.1189	0.1321	0.0973	0.0497	0.0478	0.0542	0.0558	0.0513	0.0899	0.0858	0.091	0.0956
TG(14:0_16:0_18:1)	TG	triacyl	659	[M+NH4]	TG(48:1)	(14:0_16:0_18:1)	(48:1)	804.721	23.245	C51 H96 O6	1	1	1	100	A	0.1606	0.207	0.1326	0.183	0.2547	0.2244	0.1531	0.1956	0.2219	0.2016	0.213	0.1863	0.1166	0.1342	0.1293	0.1533	0.129	0.1687	0.1836	0.1816	0.1877
TG(14:0_16:0_18:0)	TG	triacyl	679	[M+NH4]	TG(48:0)	(14:0_16:0_18:0)	(48:0)	806.736	23.559	C51 H98 O6	2	2	1	100	A	0.8296	0.8462	0.7317	1.0853	1.351	1.1888	1.0858	1.3363	1.5535	0.8628	1.1377	0.8918	0.9308	1.0025	0.9417	1.023	0.9563	1.2679	1.1583	1.1735	1.1093
TG(15:0_16:1_18:2)	TG	triacyl	707	[M+NH4]	TG(49:3)	(15:0_16:1_18:2)	(49:3)	814.705	22.859	C52 H94 O6	1	2	1	66.7	A	0.0064	0.0208	0.0081	0.008	0.0126	0.0066	0.0052	0.0082	0.0086	0.0096	0.0113	0.0089	0.0067	0.0071	0.0059	0.0065	0.0055	0.008	0.0094	0.0096	0.0097
TG(15:0_16:0_18:1)	TG	triacyl	729	[M+NH4]	TG(49:1)	(15:0_16:0_18:1)	(49:1)	818.736	23.386	C52 H98 O6	1	1	1	100	A	0.0143	0.0401	0.0158	0.0231	0.0341	0.0213	0.018	0.0221	0.0234	0.0246	0.0335	0.0262	0.0185	0.02	0.0149	0.0212	0.0175	0.0221	0.0264	0.0268	0.0269
TG(16:0_16:0_17:0)	TG	triacyl	744	[M+NH4]	TG(49:0)	(16:0_16:0_17:0)	(49:0)	820.752	23.701	C52 H100 O6	1	1	1	100	A	0.0261	0.0451	0.0257	0.0397	0.0474	0.0413	0.0324	0.0432	0.0444	0.0361	0.044	0.0315	0.0373	0.0358	0.0362	0.0367	0.0336	0.0426	0.0468	0.0423	0.0447
TG(16:1_16:1_18:2)	TG	triacyl	773	[M+NH4]	TG(50:4)	(16:1_16:1_18:2)	(50:4)	826.705	22.736	C53 H94 O6	1	3	1	100	A	0.1088	0.1824	0.1208	0.1391	0.2217	0.1319	0.1051	0.1367	0.158	0.2107	0.2613	0.196	0.109	0.1006	0.0957	0.1119	0.1015	0.1529	0.163	0.1748	0.1805
TG(16:1_16:1_18:1)	TG	triacyl	782	[M+NH4]	TG(50:3)	(16:1_16:1_18:1)	(50:3)	828.721	22.986	C53 H96 O6	1	3	1	100	A	0.347	0.5031	0.319	0.4472	0.7307	0.4525	0.2937	0.4369	0.4834	0.6073	0.7685	0.6149	0.3321	0.3638	0.3779	0.3626	0.3216	0.4405	0.4967	0.5254	0.5821
TG(16:0_16:0_18:2)	TG	triacyl	814	[M+NH4]	TG(50:2)	(16:0_16:0_18:2)	(50:2)	830.736	23.285	C53 H98 O6	2	2	1	100	A	0.6358	0.7734	0.5186	0.7121	1.0852	0.7035	0.5407	0.866	0.8964	0.8099	0.9988	0.8092	0.5525	0.4809	0.5464	0.6439	0.5603	0.6995	0.74	0.814	0.7558
TG(16:0_16:0_18:1)	TG	triacyl	830	[M+NH4]	TG(50:1)	(16:0_16:0_18:1)	(50:1)	832.752	23.533	C53 H100 O6	2	1	2	100	A	0.4393	0.4959	0.3694	0.6555	0.9209	0.7101	0.5629	0.7367	0.7627	0.7223	0.8558	0.7706	0.4396	0.4836	0.4774	0.5445	0.4613	0.6304	0.6529	0.6696	0.7383
TG(16:0_16:0_18:0)	TG	triacyl	847	[M+NH4]	TG(50:0)	(16:0_16:0_18:0)	(50:0)	834.768	23.848	C53 H102 O6	2	1	1	100	A	0.3485	0.2889	0.2806	0.5331	0.6517	0.6075	0.3938	0.5199	0.6759	0.413	0.5621	0.3172	0.4139	0.4468	0.4283	0.4721	0.4747	0.5013	0.5791	0.5384	0.4943
TG(16:1_17:1_18:2)	TG	triacyl	852	[M+NH4]	TG(51:4)	(16:1_17:1_18:2)	(51:4)	840.721	22.887	C54 H96 O6	1	1	1	100	A	0.0093	0.0198	0.0111	0.0144	0.0214	0.0119	0.01	0.0135	0.0155	0.0172	0.0232	0.0153	0.0111	0.0088	0.0096	0.0098	0.0097	0.0121	0.0155	0.0164	0.016
TG(16:1_17:1_18:1)	TG	triacyl	862	[M+NH4]	TG(51:3)	(16:1_17:1_18:1)	(51:3)	842.736	23.135	C54 H98 O6	1	2	1	100	B	0.0223	0.0437	0.0215	0.0344	0.0485	0.0288	0.0207	0.0308	0.029	0.0385	0.0518	0.0372	0.0246	0.0229	0.0208	0.0264	0.0245	0.0308	0.0368	0.0372	0.04
TG(16:0_17:0_18:2)	TG	triacyl	870	[M+NH4]	TG(51:2)	(16:0_17:0_18:2)	(51:2)	844.752	23.394	C54 H100 O6	1	2	1	100	A	0.0254	0.0434	0.0234	0.0391	0.0594	0.0365	0.0284	0.0385	0.0375	0.0462	0.0588	0.0453	0.0319	0.0279	0.0256	0.0323	0.0286	0.0371	0.0427	0.044	0.0455
TG(16:0_17:0_18:1)	TG	triacyl	894	[M+NH4]	TG(51:1)	(16:0_17:0_18:1)	(51:1)	846.768	23.684	C54 H102 O6	1	1	1	100	A	0.0159	0.0219	0.0147	0.0259	0.034	0.0248	0.0198	0.0233	0.0226	0.0259	0.0318	0.0277	0.0183	0.0174	0.0179	0.0212	0.0181	0.0228	0.0267	0.0275	0.0281
TG(16:0_17:0_18:0)	TG	triacyl	903	[M+NH4]	TG(51:0)	(16:0_17:0_18:0)	(51:0)	848.783	23.983	C54 H104 O6	1	2	1	100	A	0.0121	0.0098	0.0099	0.0182	0.023	0.0184	0.0134	0.0209	0.0221	0.0132	0.018	0.0091	0.0145	0.0149	0.0127	0.0174	0.0165	0.0184	0.0191	0.0189	0.0171
TG(16:1_18:2_18:3)	TG	triacyl	908	[M+NH4]	TG(52:6)	(16:1_18:2_18:3)	(52:6)	850.705	22.543	C55 H94 O6	1	1	2	100	A	0.0289	0.0579	0.0416	0.0361	0.0628	0.0387	0.0302	0.043	0.0481	0.0519	0.0694	0.057	0.0303	0.031	0.0271	0.0309	0.0301	0.0378	0.0458	0.0491	0.0495
TG(16:0_18:2_18:3)	TG	triacyl	948	[M+NH4]	TG(52:5)	(16:0_18:2_18:3)	(52:5)	852.721	22.762	C55 H96 O6	1	2	2	100	A	0.2202	0.3591	0.32	0.2825	0.4127	0.2729	0.2385	0.3132	0.3314	0.4177	0.5429	0.4133	0.2467	0.2228	0.1979	0.2398	0.2136	0.2908	0.343	0.3861	0.361
TG(16:1_18:1_18:2)	TG	triacyl	962	[M+NH4]	TG(52:4)	(16:1_18:1_18:2)	(52:4)	854.736	23.026	C55 H98 O6	2	3	1	100	A	0.7523	1.1464	0.8439	1.0489	1.557	0.926	0.8202	1.1432	1.1776	1.3763	1.5816	1.4151	0.8904	0.8431	0.8389	0.8427	0.7307	0.9849	1.2747	1.2669	1.4187
TG(16:0_18:1_18:2)	TG	triacyl	1000	[M+NH4]	TG(52:3)	(16:0_18:1_18:2)	(52:3)	856.752	23.283	C55 H100 O6	2	1	1	100	A	0.9549	1.2686	0.8886	1.0939	1.5897	1.0009	0.8433	1.3613	1.3934	1.1845	1.554	1.2147	0.8956	0.728	0.8577	0.9919	0.8939	1.0901	1.139	1.2477	1.1615
TG(16:0_18:0_18:2)	TG	triacyl	1017	[M+NH4]	TG(52:2)	(16:0_18:0_18:2)	(52:2)	858.768	23.534	C55 H102 O6	2	2	1	100	A	0.4697	0.5887	0.4425	0.6959	1.0727	0.7424	0.5844	0.8085	0.8248	0.8222	1.0412	0.7986	0.4985	0.5129	0.5249	0.5839	0.5247	0.6908	0.739	0.7323	0.8455
TG(16:0_18:0_18:1)	TG	triacyl	1616	[M+NH4]	TG(52:1)	(16:0_18:0_18:1)	(52:1)	860.783	23.835	C55 H104 O6	2	1	1	66.7	A	0.1769	0.1595	0.1328	0.2731	0.3382	0.3027	0.2216	0.2639	0.2655	0.3113	0.3591	0.3402	0.1982	0.1937	0.1962	0.22	0.1993	0.2254	0.2899	0.2905	0.2833
TG(16:0_18:0_18:0)	TG	triacyl	1088	[M+NH4]	TG(52:0)	(16:0_18:0_18:0)	(52:0)	862.799	24.141	C55 H106 O6	1	1	1	100	A	0.0357	0.0214	0.0315	0.0443	0.0581	0.0542	0.0578	0.0848	0.1258	0.0332	0.0442	0.0225	0.0384	0.039	0.0355	0.0408	0.0443	0.0572	0.0592	0.059	0.0463
TG(17:0_18:1_18:3)	TG	triacyl	1115	[M+NH4]	TG(53:4)	(17:0_18:1_18:3)	(53:4)	868.752	23.143	C56 H100 O6	1	2	2	66.7	A	0.0189	0.0299	0.0216	0.0252	0.0387	0.0237	0.0211	0.0289	0.0266	0.0333	0.0448	0.034	0.0226	0.0209	0.0197	0.0248	0.0216	0.0266	0.0315	0.0315	0.0344
TG(17:0_18:1_18:2)	TG	triacyl	1122	[M+NH4]	TG(53:3)	(17:0_18:1_18:2)	(53:3)	870.768	23.412	C56 H102 O6	1	1	1	100	A	0.0242	0.0353	0.0237	0.0353	0.0572	0.0352	0.0284	0.0386	0.0373	0.0461	0.0597	0.0472	0.0325	0.0255	0.0263	0.0292	0.0264	0.0356	0.0428	0.0425	0.044
TG(18:1_18:3_18:4)	TG	triacyl	1141	[M+NH4]	TG(54:8)	(18:1_18:3_18:4)	(54:8)	874.705	22.38	C57 H94 O6	1	3	2	66.7	A	0.0035	0.0084	0.0062	0.0042	0.0068	0.004	0.0077	0.0085	0.0082	0.0067	0.0114	0.0068	0.0082	0.0041	0.0041	0.0037	0.0033	0.0044	0.0057	0.0068	0.0071
TG(14:0_18:2_22:6)	TG	triacyl	1146	[M+NH4]	TG(54:8)	(14:0_18:2_22:6)	(54:8)	874.705	22.545	C57 H94 O6	1	3	1	66.7	A	0.0046	0.01	0.0058	0.0048	0.0083	0.0048	0.0056	0.0059	0.0062	0.0069	0.0106	0.0078	0.0043	0.0043	0.0036	0.0037	0.0044	0.0055	0.0063	0.0061	0.0075
TG(16:0_19:0_18:1)	TG	triacyl	1150	[M+NH4]	TG(53:1)	(16:0_19:0_18:1)	(53:1)	874.799	23.975	C56 H106 O6	1	1	1	100	A	0.0065	0.0062	0.0048	0.0099	0.0131	0.0104	0.0079	0.0093	0.0089	0.0097	0.0136	0.0106	0.0068	0.0071	0.0069	0.009	0.0076	0.0086	0.01	0.0099	0.0104
TG(16:1_18:2_20:4)	TG	triacyl	1160	[M+NH4]	TG(54:7)	(16:1_18:2_20:4)	(54:7)	876.721	22.584	C57 H96 O6	2	3	1	100	A	0.0541	0.1244	0.1048	0.0763	0.1184	0.0609	0.0919	0.113	0.1132	0.1138	0.1527	0.1268	0.0747	0.0635	0.0647	0.0594	0.0571	0.0653	0.102	0.1136	0.1083
TG(16:0_18:0_19:0)	TG	triacyl	1170	[M+NH4]	TG(53:0)	(16:0_18:0_19:0)	(53:0)	876.815	24.288	C56 H108 O6	1	1	1	100	A	0.0032	0.0033	0.0023	0.005	0.0068	0.0057	0.0042	0.0071	0.0113	0.003	0.0052	0.0029	0.0048	0.0049	0.0044	0.0054	0.0049	0.006	0.0054	0.0056	0.0052
TG(18:1_18:2_18:3)	TG	triacyl	1180	[M+NH4]	TG(54:6)	(18:1_18:2_18:3)	(54:6)	878.736	22.798	C57 H98 O6	2	3	2	100	A	0.2845	0.6555	0.5133	0.3868	0.503	0.3741	0.465	0.5948	0.5648	0.5398	0.7967	0.5613	0.3976	0.3345	0.2961	0.31	0.2896	0.3608	0.5073	0.4861	0.5197
TG(18:1_18:2_18:2)	TG	triacyl	1197	[M+NH4]	TG(54:5)	(18:1_18:2_18:2)	(54:5)	880.752	23.034	C57 H100 O6	2	3	1	100	A	0.5983	1.1069	0.9037	0.8451	1.1207	0.714	0.8381	1.0241	1.0475	1.1248	1.2199	1.1713	0.8032	0.7385	0.7264	0.7384	0.6233	0.8288	1.1339	1.0671	1.1858
TG(18:1_18:1_18:2)	TG	triacyl	1228	[M+NH4]	TG(54:4)	(18:1_18:1_18:2)	(54:4)	882.768	23.282	C57 H102 O6	1	5	1	100	A	0.6245	0.9924	0.7343	0.7304	0.9844	0.692	0.7645	1.0481	1.0787	0.7987	1.0197	0.8275	0.6496	0.5423	0.6081	0.6424	0.5984	0.7175	0.7894	0.8873	0.8161
TG(18:0_18:1_18:2)	TG	triacyl	1240	[M+NH4]	TG(54:3)	(18:0_18:1_18:2)	(54:3)	884.783	23.541	C57 H104 O6	1	2	1	100	A	0.3332	0.475	0.3978	0.4292	0.7046	0.463	0.662	0.8055	0.7122	0.5735	0.7249	0.5796	0.4145	0.4291	0.4365	0.3966	0.3636	0.4782	0.5652	0.572	0.6296
TG(16:0_18:1_20:1)	TG	triacyl	1254	[M+NH4]	TG(54:2)	(16:0_18:1_20:1)	(54:2)	886.799	23.818	C57 H106 O6	1	4	1	100	A	0.1006	0.108	0.0831	0.1607	0.2163	0.18	0.1489	0.1814	0.1744	0.1643	0.2182	0.2027	0.1369	0.1194	0.1254	0.1368	0.125	0.1465	0.1782	0.1836	0.1812
TG(16:0_18:0_20:1)	TG	triacyl	1636	[M+NH4]	TG(54:1)	(16:0_18:0_20:1)	(54:1)	888.815	24.121	C57 H108 O6	1	1	1	66.7	B	0.0144	0.0104	0.0113	0.0203	0.031	0.0243	0.0201	0.028	0.0277	0.0235	0.029	0.0269	0.0172	0.0164	0.0156	0.019	0.0161	0.0217	0.0237	0.0242	0.0228
TG(18:1_19:1_18:2)	TG	triacyl	1263	[M+NH4]	TG(55:4)	(18:1_19:1_18:2)	(55:4)	896.783	23.411	C58 H104 O6	1	1	1	100	A	0.0092	0.0138	0.0114	0.0137	0.0211	0.0137	0.0111	0.0154	0.0136	0.0178	0.0246	0.018	0.0129	0.0104	0.0106	0.0111	0.0117	0.0141	0.0161	0.0166	0.0178
TG(19:0_18:1_18:2)	TG	triacyl	1271	[M+NH4]	TG(55:3)	(19:0_18:1_18:2)	(55:3)	898.799	23.688	C58 H106 O6	1	1	1	100	A	0.0078	0.01	0.0079	0.0127	0.0177	0.0127	0.0108	0.0137	0.0118	0.0129	0.0211	0.0161	0.0106	0.0088	0.0091	0.0109	0.0093	0.0138	0.0139	0.014	0.0141
TG(18:2_18:3_20:4)	TG	triacyl	1291	[M+NH4]	TG(56:9)	(18:2_18:3_20:4)	(56:9)	900.721	22.528	C59 H96 O6	1	1	2	100	A	0.0157	0.0369	0.0257	0.0191	0.031	0.0191	0.0206	0.0245	0.0269	0.0266	0.032	0.0312	0.0179	0.0167	0.0163	0.0163	0.0148	0.0201	0.026	0.0287	0.0284
TG(18:0_19:0_18:2)	TG	triacyl	1296	[M+NH4]	TG(55:2)	(18:0_19:0_18:2)	(55:2)	900.815	23.97	C58 H108 O6	1	1	1	100	A	0.0036	0.0046	0.0029	0.0061	0.009	0.0074	0.0048	0.0071	0.0054	0.0076	0.0113	0.0083	0.0053	0.0045	0.0042	0.0058	0.0049	0.0063	0.0069	0.0071	0.0074
TG(16:0_18:2_22:6)	TG	triacyl	1312	[M+NH4]	TG(56:8)	(16:0_18:2_22:6)	(56:8)	902.736	22.834	C59 H98 O6	1	2	1	66.7	A	0.0383	0.072	0.0525	0.0439	0.0621	0.0437	0.043	0.0536	0.051	0.0602	0.0778	0.0632	0.0431	0.0362	0.0349	0.0369	0.0366	0.0458	0.058	0.0671	0.0582
TG(18:1_18:2_20:4)	TG	triacyl	1648	[M+NH4]	TG(56:7)	(18:1_18:2_20:4)	(56:7)	904.752	22.944	C59 H100 O6	2	2	1	66.7	A	0.034	0.0773	0.0615	0.0622	0.0808	0.0552	0.05	0.0567	0.061	0.0688	0.082	0.0651	0.0461	0.0449	0.0545	0.0546	0.0466	0.0465	0.0702	0.0717	0.0807
TG(16:0_18:2_22:4)	TG	triacyl	1322	[M+NH4]	TG(56:6)	(16:0_18:2_22:4)	(56:6)	906.768	23.177	C59 H102 O6	1	3	1	66.7	A	0.0319	0.0699	0.0496	0.0436	0.061	0.0452	0.0421	0.0497	0.0536	0.0551	0.062	0.057	0.0369	0.0386	0.0341	0.041	0.0384	0.0439	0.0578	0.0523	0.0633
TG(16:0_18:0_22:6)	TG	triacyl	1323	[M+NH4]	TG(56:6)	(16:0_18:0_22:6)	(56:6)	906.768	23.367	C59 H102 O6	1	3	1	66.7	A	0.0049	0.006	0.0039	0.0044	0.0075	0.0055	0.0045	0.0055	0.0055	0.0066	0.0114	0.0071	0.006	0.0043	0.004	0.0052	0.0052	0.0062	0.006	0.0065	0.0071
TG(18:1_20:1_18:3)	TG	triacyl	1328	[M+NH4]	TG(56:5)	(18:1_20:1_18:3)	(56:5)	908.783	23.31	C59 H104 O6	1	4	2	100	A	0.0344	0.0572	0.0434	0.0498	0.0706	0.0414	0.0368	0.0574	0.0521	0.0565	0.0821	0.0614	0.0467	0.0341	0.0356	0.0431	0.0423	0.0522	0.0518	0.0552	0.0522
TG(18:0_18:1_20:4)	TG	triacyl	1330	[M+NH4]	TG(56:5)	(18:0_18:1_20:4)	(56:5)	908.783	23.479	C59 H104 O6	1	4	1	100	A	0.0072	0.0112	0.0103	0.0114	0.0112	0.0099	0.0074	0.0113	0.0125	0.0111	0.0115	0.0151	0.0098	0.0089	0.0092	0.01	0.0079	0.0101	0.0107	0.0136	0.0157
TG(18:1_18:1_20:1)	TG	triacyl	1350	[M+NH4]	TG(56:3)	(18:1_18:1_20:1)	(56:3)	912.815	23.81	C59 H108 O6	1	3	1	66.7	A	0.0286	0.0293	0.0261	0.0452	0.058	0.0467	0.054	0.0589	0.0577	0.0475	0.063	0.0533	0.0397	0.0345	0.0348	0.036	0.0334	0.0402	0.054	0.0513	0.0526
TG(16:0_18:0_22:0)	TG	triacyl	1365	[M+NH4]	TG(56:0)	(16:0_18:0_22:0)	(56:0)	918.862	24.792	C59 H114 O6	1	1	1	100	A	0.002	0.0028	0.0023	0.0037	0.0052	0.0041	0.0039	0.0067	0.012	0.0021	0.0035	0.0021	0.0028	0.003	0.0025	0.0039	0.0038	0.0046	0.0045	0.0045	0.0038
TG(18:2_18:3_22:6)	TG	triacyl	1373	[M+NH4]	TG(58:11)	(18:2_18:3_22:6)	(58:11)	924.721	22.39	C61 H96 O6	1	1	2	100	A	0.0028	0.0066	0.0052	0.0033	0.0045	0.0033	0.0039	0.0047	0.0049	0.0042	0.006	0.0043	0.0033	0.003	0.0026	0.0031	0.003	0.0035	0.0043	0.0045	0.0048
TG(18:2_18:2_22:6)	TG	triacyl	1391	[M+NH4]	TG(58:10)	(18:2_18:2_22:6)	(58:10)	926.736	22.596	C61 H98 O6	1	1	1	100	A	0.0193	0.0415	0.0351	0.0247	0.0363	0.0212	0.0259	0.0288	0.032	0.0353	0.0434	0.0386	0.026	0.0194	0.0197	0.0202	0.0187	0.0217	0.0324	0.0319	0.0367
TG(18:2_18:2_22:5)	TG	triacyl	1400	[M+NH4]	TG(58:9)	(18:2_18:2_22:5)	(58:9)	928.752	22.707	C61 H100 O6	1	2	1	100	A	0.005	0.0116	0.0052	0.0051	0.0089	0.0062	0.0057	0.0051	0.005	0.0079	0.0087	0.0078	0.0048	0.0042	0.0041	0.0037	0.0045	0.0053	0.006	0.0073	0.0073
TG(18:1_18:2_22:6)	TG	triacyl	1401	[M+NH4]	TG(58:9)	(18:1_18:2_22:6)	(58:9)	928.752	22.82	C61 H100 O6	1	2	1	66.7	A	0.0367	0.0741	0.0578	0.0429	0.0521	0.0442	0.0441	0.0547	0.0521	0.0597	0.0727	0.062	0.0421	0.0347	0.0354	0.0387	0.0369	0.0437	0.0569	0.0519	0.0577
TG(18:1_18:2_22:5)	TG	triacyl	1409	[M+NH4]	TG(58:8)	(18:1_18:2_22:5)	(58:8)	930.768	23.082	C61 H102 O6	1	1	1	66.7	A	0.0253	0.0516	0.0384	0.0352	0.0431	0.0315	0.0337	0.0411	0.0394	0.0383	0.0515	0.0457	0.0275	0.0299	0.0252	0.029	0.031	0.0336	0.0454	0.0441	0.0484
TG(18:1_18:2_22:4)	TG	triacyl	1413	[M+NH4]	TG(58:7)	(18:1_18:2_22:4)	(58:7)	932.783	23.155	C61 H104 O6	1	3	1	66.7	A	0.007	0.0301	0.0137	0.0216	0.0265	0.0185	0.0165	0.0246	0.0229	0.0207	0.0289	0.0219	0.0149	0.0129	0.0123	0.0186	0.0176	0.0193	0.0235	0.0229	0.0276
TG(18:0_18:1_22:6)	TG	triacyl	1414	[M+NH4]	TG(58:7)	(18:0_18:1_22:6)	(58:7)	932.783	23.352	C61 H104 O6	1	3	1	66.7	B	0.0058	0.008	0.0067	0.0075	0.0106	0.0067	0.0075	0.0089	0.0085	0.0092	0.0122	0.0097	0.007	0.0069	0.0076	0.0065	0.0061	0.0087	0.0091	0.0092	0.0079
TG(18:1_22:1_18:3)	TG	triacyl	1424	[M+NH4]	TG(58:5)	(18:1_22:1_18:3)	(58:5)	936.815	23.586	C61 H108 O6	1	1	3	66.7	A	0.0032	0.0031	0.0041	0.0037	0.0066	0.0042	0.0029	0.0054	0.0049	0.005	0.0077	0.0049	0.0024	0.0031	0.0031	0.0033	0.0033	0.0053	0.0053	0.0042	0.0053
TG(18:1_22:1_18:2)	TG	triacyl	1429	[M+NH4]	TG(58:4)	(18:1_22:1_18:2)	(58:4)	938.83	23.815	C61 H110 O6	1	1	2	100	A	0.0044	0.0057	0.0042	0.0083	0.0101	0.0069	0.0079	0.0089	0.0068	0.0077	0.0103	0.0103	0.0062	0.0045	0.0046	0.0054	0.0057	0.0065	0.0083	0.0078	0.0081
TG(16:0_24:0_18:1)	TG	triacyl	1449	[M+NH4]	TG(58:1)	(16:0_24:0_18:1)	(58:1)	944.877	24.751	C61 H116 O6	1	1	0	100	B	0.0013	0.002	0.001	0.0033	0.0042	0.0032	0.0029	0.0044	0.0045	0.0022	0.0028	0.0021	0.0018	0.0023	0.002	0.0032	0.0023	0.0032	0.0031	0.0035	0.003
TG(18:1_20:4_22:6)	TG	triacyl	1457	[M+NH4]	TG(60:11)	(18:1_20:4_22:6)	(60:11)	952.752	22.732	C63 H100 O6	1	1	1	66.7	A	0.0018	0.0034	0.0037	0.0023	0.0024	0.0017	0.0027	0.0028	0.0027	0.0025	0.0024	0.0023	0.0018	0.0025	0.0015	0.002	0.0018	0.002	0.003	0.0031	0.0033
TG(24:0_18:1_18:2)	TG	triacyl	1676	[M+NH4]	TG(60:3)	(24:0_18:1_18:2)	(60:3)	968.877	24.443	C63 H116 O6	1	1	0	66.7	A	0.0016	0.0015	0.0011	0.0053	0.0057	0.0043	0.006	0.0072	0.0066	0.0046	0.0057	0.0039	0.0033	0.0035	0.0032	0.0035	0.0031	0.0041	0.0042	0.0049	0.0049

## Sheet: Spleen
Table S2: Characterization and quantification of mouse spleen lipidome using the six tested extraction methods																concentration (uM)
LipidMolec	ClassKey	SubClassKey	LipidSearch ID	Adduct	LipidMolecGroup	FAKey	FAGroupKey	CalcMass	BaseRt	MolFormula	IonCnt	IsoCnt	PDBCnt	TotalSmpIDRate(%)	TotalGrade	IPA_S1	IPA_S2	IPA_S3	MMC_S1	MMC_S2	MMC_S3	EE_S1	EE_S2	EE_S3	Folch_S1	Folch_S2	Folch_S3	BuME_S1	BuME_S2	BuME_S3	MTBE_S1	MTBE_S2	MTBE_S3	QC pooled_p01	QC pooled_p02	QC pooled_p03
AcCa(14:0)	AcCa	Fatty acyl carnitines	1055	M+H	AcCa(14:0)	(14:0)	(14:0)	371.304	4.468	C21 H41 N1 O4	1	1	0	100	A	0.0905	0.1028	0.103	0.074	0.0762	0.0748	0.1084	0.1171	0.1114	0.0484	0.0589	0.062	0.1025	0.1023	0.1157	0.0417	0.0407	0.0383	0.0465	0.0632	0.0694
AcCa(16:1)	AcCa	Fatty acyl carnitines	1064	M+H	AcCa(16:1)	(16:1)	(16:1)	397.319	5.245	C23 H43 N1 O4	1	1	0	100	A	0.077	0.0878	0.0938	0.0649	0.0708	0.0509	0.1142	0.1305	0.1197	0.0512	0.0656	0.0649	0.0743	0.057	0.0827	0.0712	0.0676	0.0602	0.0506	0.0727	0.0597
AcCa(16:0)	AcCa	Fatty acyl carnitines	1073	M+H	AcCa(16:0)	(16:0)	(16:0)	399.335	5.467	C23 H45 N1 O4	1	1	0	100	A	2.4907	2.8392	2.8956	1.875	1.8632	1.6739	2.8648	2.9101	2.9993	1.4258	1.5737	1.6828	1.545	1.6333	1.9025	2.147	1.9028	1.7098	1.4457	1.8146	2.0452
AcCa(17:0)	AcCa	Fatty acyl carnitines	1085	M+H	AcCa(17:0)	(17:0)	(17:0)	413.351	5.918	C24 H47 N1 O4	1	1	0	66.7	A	0.0316	0.0349	0.0506	0.0297	0.0095	0.023	0.0331	0.0318	0.0555	0.0205	0.0246	0.0256	0.0199	0.019	0.0285	0.0396	0.037	0.0223	0.0315	0.0382	0.0382
AcCa(18:2)	AcCa	Fatty acyl carnitines	1097	M+H	AcCa(18:2)	(18:2)	(18:2)	423.335	5.046	C25 H45 N1 O4	1	1	0	100	A	0.2479	0.2703	0.3047	0.1878	0.2002	0.182	0.2729	0.2972	0.2787	0.1456	0.1532	0.1848	0.1629	0.1649	0.1888	0.1795	0.1711	0.1274	0.1308	0.1839	0.193
AcCa(18:1)	AcCa	Fatty acyl carnitines	1099	M+H	AcCa(18:1)	(18:1)	(18:1)	425.351	5.63	C25 H47 N1 O4	1	1	0	100	A	0.6215	0.7039	0.6998	0.437	0.4832	0.4676	0.7269	0.7026	0.7449	0.3469	0.436	0.4159	0.3862	0.4912	0.4568	0.5983	0.5225	0.4522	0.3773	0.4619	0.5365
AcCa(18:0)	AcCa	Fatty acyl carnitines	1102	M+H	AcCa(18:0)	(18:0)	(18:0)	427.366	6.439	C25 H49 N1 O4	1	1	0	100	A	0.7559	0.86	0.8924	0.5232	0.5159	0.4338	0.8233	0.8642	0.8377	0.4745	0.502	0.533	0.5183	0.509	0.5795	0.9727	0.8387	0.7455	0.4218	0.5549	0.6135
AcCa(20:4)	AcCa	Fatty acyl carnitines	1105	M+H	AcCa(20:4)	(20:4)	(20:4)	447.335	4.996	C27 H45 N1 O4	1	1	0	100	A	0.2493	0.2701	0.3083	0.1819	0.1962	0.1852	0.2825	0.2815	0.2814	0.1474	0.1726	0.1702	0.1642	0.1733	0.1863	0.1755	0.1645	0.1337	0.1346	0.1817	0.2062
AcCa(20:2)	AcCa	Fatty acyl carnitines	1234	M+H	AcCa(20:2)	(20:2)	(20:2)	451.366	5.851	C27 H49 N1 O4	1	1	0	100	A	0.1486	0.167	0.1547	0.1015	0.1068	0.1081	0.1803	0.1924	0.1861	0.0808	0.1073	0.1092	0.0991	0.1178	0.1148	0.1584	0.1499	0.1126	0.0902	0.1217	0.1242
AcCa(20:1)	AcCa	Fatty acyl carnitines	1236	M+H	AcCa(20:1)	(20:1)	(20:1)	453.382	6.553	C27 H51 N1 O4	1	1	0	100	A	0.1268	0.1444	0.1535	0.0956	0.1056	0.0964	0.1691	0.1636	0.1549	0.0764	0.0847	0.0881	0.0908	0.0931	0.1041	0.2013	0.158	0.1409	0.0832	0.1158	0.1101
AcCa(20:0)	AcCa	Fatty acyl carnitines	1239	M+H	AcCa(20:0)	(20:0)	(20:0)	455.397	7.656	C27 H53 N1 O4	1	1	0	100	A	0.0465	0.0485	0.0504	0.0311	0.0372	0.0308	0.0625	0.0653	0.0644	0.0329	0.0348	0.0415	0.0327	0.0463	0.0327	0.0657	0.0695	0.0616	0.0332	0.0396	0.0411
AcCa(22:6)	AcCa	Fatty acyl carnitines	1540	M+H	AcCa(22:6)	(22:6)	(22:6)	471.335	4.895	C29 H45 N1 O4	1	1	0	66.7	A	0.0253	0.0258	0.0293	0.0198	0.021	0.0165	0.0291	0.0264	0.0268	0.0153	0.0179	0.0188	0.0185	0.0159	0.0194	0.0179	0.0168	0.0139	0.0147	0.0189	0.0206
AEA(13:0)	AEA	N-acyl ethanolamines	1015	M+H	AEA(13:0)	(13:0)	(13:0)	257.235	5.318	C15 H31 N1 O2	1	1	0	100	C	0.0073	0.0074	0.0069	0.0221	0.0188	0.0227	0.0181	0.0218	0.0203	0.1191	0.1496	0.1246	0.044	0.0485	0.0467	0.0519	0.0621	0.0601	0.0502	0.0508	0.0482
AEA(15:0)	AEA	N-acyl ethanolamines	1025	M+H	AEA(15:0)	(15:0)	(15:0)	285.267	5.003	C17 H35 N1 O2	1	1	0	66.7	B	0.0055	0.0093	0.0105	0.0115	0.0098	0.0105	0.0062	0.0084	0.003	0.0072	0.0123	0.0123	0.0284	0.0294	0.0236	0.0048	0.0022	0.0041	0.009	0.0071	0.0091
AEA(15:0)	AEA	N-acyl ethanolamines	1026	M+H	AEA(15:0)	(15:0)	(15:0)	285.267	6.421	C17 H35 N1 O2	1	1	0	100	C	0.001	0.0014	0.0013	0.0033	0.0029	0.0031	0.004	0.0065	0.0055	0.0343	0.0434	0.0386	0.0114	0.0106	0.0114	0.012	0.0106	0.0123	0.0108	0.0118	0.0096
AEA(16:0)	AEA	N-acyl ethanolamines	1039	M+H	AEA(16:0)	(16:0)	(16:0)	299.282	6.898	C18 H37 N1 O2	1	1	0	100	B	0.0131	0.0173	0.0152	0.0132	0.0173	0.0124	0.0131	0.0142	0.0154	0.0161	0.0148	0.017	0.0216	0.02	0.0203	0.0155	0.0166	0.0212	0.0182	0.0179	0.0184
AEA(17:0)	AEA	N-acyl ethanolamines	1048	M+H	AEA(17:0)	(17:0)	(17:0)	313.298	7.785	C19 H39 N1 O2	1	1	0	66.7	C	0.0008	0.0011	0.0014	0.0021	0.0024	0.002	0.0031	0.0025	0.0025	0.0164	0.0197	0.0173	0.0057	0.005	0.0055	0.005	0.0048	0.0057	0.0053	0.006	0.0048
AEA(18:0)	AEA	N-acyl ethanolamines	1056	M+H	AEA(18:0)	(18:0)	(18:0)	327.314	6.026	C20 H41 N1 O2	1	1	0	66.7	C	0.0132	0.015	0.0172	0.0317	0.0263	0.0201	0.0161	0.0164	0.0108	0.0131	0.015	0.0157	0.0396	0.0406	0.0389	0.0048	0.0052	0.0044	0.0145	0.0169	0.0128
AEA(18:0)	AEA	N-acyl ethanolamines	1057	M+H	AEA(18:0)	(18:0)	(18:0)	327.314	8.376	C20 H41 N1 O2	1	1	0	100	C	0.0146	0.0157	0.0171	0.016	0.016	0.0164	0.017	0.0178	0.0176	0.0153	0.016	0.0147	0.0197	0.0167	0.0173	0.0216	0.0211	0.0219	0.0196	0.0191	0.0194
Cer(d16:0_17:1)	Cer	acylsphingosines	214	M+H	Cer(d33:1)	(d16:0_17:1)	(d33:1)	523.496	16.752	C33 H65 N1 O3	2	2	2	66.7	B	0.012	0.0122	0.0127	0.0091	0.0088	0.0099	0.0113	0.0106	0.0117	0.008	0.0087	0.0088	0.011	0.0118	0.0112	0.0098	0.0095	0.0086	0.0107	0.0101	0.0112
Cer(d18:2_16:0)	Cer	acylsphingosines	678	M+H	Cer(d34:2)	(d18:2_16:0)	(d34:2)	535.496	15.865	C34 H65 N1 O3	2	2	1	66.7	A	0.0205	0.0187	0.0204	0.0263	0.027	0.0248	0.0226	0.0169	0.0201	0.0145	0.0155	0.0176	0.0217	0.0205	0.0198	0.0191	0.0171	0.0186	0.0213	0.0191	0.0196
Cer(d18:1_16:0)	Cer	acylsphingosines	228	M+H	Cer(d34:1)	(d18:1_16:0)	(d34:1)	537.512	18.153	C34 H67 N1 O3	4	1	1	100	A	0.4056	0.3766	0.3705	0.3219	0.3384	0.3294	0.3453	0.3722	0.344	0.4137	0.4887	0.4609	0.5492	0.469	0.4809	0.3721	0.3694	0.3262	0.4571	0.4557	0.4437
Cer(d16:0_18:0)	Cer	acylsphinganines	234	M+H	Cer(d34:0)	(d16:0_18:0)	(d34:0)	539.528	12.847	C34 H69 N1 O3	1	2	1	66.7	C	0.0337	0.0319	0.0324	0.0378	0.0408	0.0448	0.0523	0.0464	0.0524	0.0299	0.0293	0.0314	0.0372	0.0434	0.0398	0.0277	0.029	0.0302	0.0399	0.0434	0.0414
Cer(d18:0_16:0)	Cer	acylsphinganines	235	M+H	Cer(d34:0)	(d18:0_16:0)	(d34:0)	539.528	19.253	C34 H69 N1 O3	2	2	1	100	A	0.0344	0.0318	0.0337	0.0239	0.025	0.0289	0.0294	0.0302	0.0302	0.0249	0.0255	0.0257	0.0299	0.0306	0.0278	0.031	0.0322	0.0311	0.0318	0.0267	0.0298
Cer(d18:2_18:0)	Cer	acylsphingosines	248	M+H	Cer(d36:2)	(d18:2_18:0)	(d36:2)	563.528	18.7	C36 H69 N1 O3	2	2	1	100	A	0.0221	0.0226	0.0208	0.0247	0.0258	0.0281	0.0242	0.0203	0.0224	0.0152	0.0177	0.0172	0.0198	0.0217	0.0208	0.0185	0.0177	0.017	0.0228	0.0224	0.0221
Cer(d18:1_18:0)	Cer	acylsphingosines	266	M+H	Cer(d36:1)	(d18:1_18:0)	(d36:1)	565.543	20.207	C36 H71 N1 O3	2	1	1	100	A	0.1104	0.1262	0.1176	0.0907	0.0872	0.0927	0.1018	0.1036	0.1051	0.0859	0.0894	0.0916	0.1095	0.1043	0.102	0.1123	0.1039	0.1022	0.1004	0.0995	0.1036
Cer(d18:0_18:0)	Cer	acylsphinganines	273	M+H	Cer(d36:0)	(d18:0_18:0)	(d36:0)	567.559	20.578	C36 H73 N1 O3	2	1	1	66.7	A	0.0081	0.0076	0.0059	0.005	0.004	0.0054	0.0063	0.005	0.0061	0.0034	0.0044	0.0055	0.005	0.005	0.0049	0.0065	0.0069	0.0056	0.0068	0.0063	0.0065
Cer(d18:1_19:0)	Cer	acylsphingosines	278	M+H	Cer(d37:1)	(d18:1_19:0)	(d37:1)	579.559	20.675	C37 H73 N1 O3	2	2	1	100	A	0.0153	0.0135	0.0149	0.0101	0.0098	0.0101	0.012	0.0111	0.0121	0.0081	0.0091	0.0081	0.0114	0.0116	0.0103	0.0099	0.0125	0.0098	0.0124	0.0104	0.0079
Cer(d18:0_20:5)	Cer	acylsphingosines	684	M+H	Cer(d38:5)	(d18:0_20:5)	(d38:5)	585.512	18.576	C38 H67 N1 O3	1	1	0	100	C	0.0194	0.0192	0.0187	0.0158	0.0144	0.0122	0.0141	0.0173	0.0141	0.0123	0.0159	0.0161	0.0167	0.0178	0.0184	0.0165	0.0155	0.0129	0.0174	0.0188	0.0173
Cer(d18:2_20:0)	Cer	acylsphingosines	292	M+H	Cer(d38:2)	(d18:2_20:0)	(d38:2)	591.559	20.4	C38 H73 N1 O3	2	1	1	100	A	0.022	0.0216	0.0222	0.0245	0.0267	0.0212	0.0218	0.0188	0.0209	0.0154	0.0168	0.0155	0.0187	0.0188	0.0159	0.0184	0.0176	0.0147	0.0192	0.0211	0.0192
Cer(d18:1_20:0)	Cer	acylsphingosines	302	M+H	Cer(d38:1)	(d18:1_20:0)	(d38:1)	593.575	21.033	C38 H75 N1 O3	2	1	1	100	A	0.1217	0.1176	0.1236	0.0787	0.0797	0.0832	0.0815	0.0789	0.0753	0.0645	0.0897	0.0913	0.0907	0.1026	0.0925	0.0965	0.1035	0.0932	0.0917	0.0855	0.0898
Cer(d18:1_21:0)	Cer	acylsphingosines	378	M+H	Cer(d39:1)	(d18:1_21:0)	(d39:1)	607.59	21.322	C39 H77 N1 O3	2	1	1	100	A	0.02	0.0213	0.0218	0.016	0.0154	0.0165	0.0179	0.0136	0.0179	0.0161	0.0173	0.0172	0.0177	0.0189	0.018	0.0188	0.0174	0.0164	0.0174	0.0178	0.0168
Cer(d18:1_22:2)	Cer	acylsphingosines	384	M+H	Cer(d40:3)	(d18:1_22:2)	(d40:3)	617.575	20.427	C40 H75 N1 O3	2	1	0	100	A	0.025	0.0244	0.0271	0.026	0.0293	0.0291	0.0238	0.0228	0.0226	0.0185	0.0196	0.0202	0.0247	0.025	0.0233	0.0221	0.0218	0.0216	0.0267	0.0244	0.0256
Cer(d18:1_22:1)	Cer	acylsphingosines	395	M+H	Cer(d40:2)	(d18:1_22:1)	(d40:2)	619.59	21.027	C40 H77 N1 O3	1	2	0	66.7	A	0.023	0.0199	0.0246	0.0183	0.0212	0.0224	0.0178	0.0162	0.0149	0.0107	0.0159	0.0171	0.0181	0.0197	0.018	0.0179	0.0192	0.0183	0.0206	0.0194	0.021
Cer(d18:2_22:0)	Cer	acylsphingosines	396	M+H	Cer(d40:2)	(d18:2_22:0)	(d40:2)	619.59	21.141	C40 H77 N1 O3	2	2	1	100	A	0.0614	0.0635	0.0535	0.0535	0.0745	0.0649	0.0531	0.0448	0.0375	0.0382	0.0459	0.0303	0.0494	0.0553	0.0495	0.0471	0.0511	0.045	0.0459	0.0511	0.0488
Cer(d18:1_22:0)	Cer	acylsphingosines	407	M+H	Cer(d40:1)	(d18:1_22:0)	(d40:1)	621.606	21.564	C40 H79 N1 O3	3	1	1	100	A	0.2823	0.2483	0.283	0.2008	0.1909	0.1746	0.2232	0.2378	0.237	0.2257	0.2331	0.2309	0.234	0.2459	0.2387	0.2347	0.2421	0.2218	0.2204	0.2106	0.2194
Cer(d18:0_22:0)	Cer	acylsphinganines	715	M+H	Cer(d40:0)	(d18:0_22:0)	(d40:0)	623.622	21.716	C40 H81 N1 O3	2	1	1	100	A	0.0167	0.0188	0.0177	0.0116	0.0123	0.0134	0.0127	0.0141	0.0124	0.0133	0.0121	0.0138	0.0156	0.0157	0.0151	0.0114	0.0104	0.0142	0.01	0.0128	0.0133
Cer(d18:2_23:0)	Cer	acylsphingosines	420	M+H	Cer(d41:2)	(d18:2_23:0)	(d41:2)	633.606	21.407	C41 H79 N1 O3	2	2	1	100	A	0.0259	0.0249	0.0247	0.0267	0.0291	0.03	0.0228	0.0223	0.0262	0.0176	0.0224	0.0221	0.0262	0.026	0.026	0.0237	0.0222	0.0218	0.0259	0.0265	0.0253
Cer(d18:1_23:0)	Cer	acylsphingosines	700	M+H	Cer(d41:1)	(d18:1_23:0)	(d41:1)	635.622	21.761	C41 H81 N1 O3	3	1	1	100	A	0.1298	0.125	0.1302	0.0944	0.0997	0.1065	0.1063	0.1126	0.1079	0.1219	0.1181	0.134	0.1247	0.1257	0.1209	0.1186	0.1219	0.1054	0.131	0.109	0.1177
Cer(d18:0_23:0)	Cer	acylsphinganines	445	M+H	Cer(d41:0)	(d18:0_23:0)	(d41:0)	637.637	21.909	C41 H83 N1 O3	2	1	1	100	A	0.0061	0.0066	0.0071	0.0046	0.0047	0.0051	0.0047	0.0066	0.0052	0.0052	0.0058	0.0061	0.0051	0.0066	0.0056	0.0059	0.0052	0.0053	0.0051	0.005	0.005
Cer(d18:2_24:1)	Cer	acylsphingosines	331	M+H	Cer(d42:3)	(d18:2_24:1)	(d42:3)	645.606	21.103	C42 H79 N1 O3	4	1	0	100	A	0.4502	0.3751	0.4903	0.4004	0.3746	0.5156	0.3846	0.3943	0.3901	0.2934	0.3794	0.4005	0.2879	0.3288	0.419	0.3501	0.4706	0.4374	0.426	0.3902	0.3634
Cer(d18:1_24:1)	Cer	acylsphingosines	361	M+H	Cer(d42:2)	(d18:1_24:1)	(d42:2)	647.622	21.535	C42 H81 N1 O3	3	4	1	100	A	0.8713	0.8933	0.9088	0.8694	0.8654	0.9577	0.8187	0.7863	0.8777	0.7441	0.7792	0.7801	0.8825	0.9044	0.8934	0.8144	0.8106	0.7397	0.8576	0.9488	0.8476
Cer(d18:0_24:1)	Cer	acylsphingosines	467	M+H	Cer(d42:1)	(d18:0_24:1)	(d42:1)	649.637	21.696	C42 H83 N1 O3	2	2	0	66.7	A	0.039	0.0258	0.0384	0.0431	0.0424	0.0359	0.042	0.0364	0.0416	0.0387	0.0351	0.0359	0.0326	0.0427	0.0419	0.0423	0.0436	0.0344	0.0444	0.0387	0.0412
Cer(d18:0_24:0)	Cer	acylsphinganines	721	M+H	Cer(d42:0)	(d18:0_24:0)	(d42:0)	651.653	22.074	C42 H85 N1 O3	1	1	1	100	A	0.0405	0.0409	0.042	0.0257	0.0322	0.0305	0.0275	0.0338	0.029	0.0424	0.0336	0.0436	0.0392	0.0423	0.0391	0.0318	0.0334	0.0247	0.0327	0.0317	0.0358
Cer(d19:1_24:1)	Cer	acylsphingosines	481	M+H	Cer(d43:2)	(d19:1_24:1)	(d43:2)	661.637	21.732	C43 H83 N1 O3	2	2	0	100	A	0.0143	0.0147	0.0136	0.0136	0.0149	0.0133	0.0132	0.0126	0.0131	0.0132	0.0124	0.0121	0.0157	0.0158	0.0142	0.0113	0.0104	0.0119	0.0129	0.013	0.0143
Cer(d43:1)	Cer	acylsphingosines	486	M+H	Cer(d43:1)	(d43:1)	(d43:1)	663.653	22.104	C43 H85 N1 O3	2	2	1	100	A	0.0174	0.0169	0.0168	0.0123	0.0096	0.0126	0.0142	0.0151	0.0136	0.0196	0.0264	0.0218	0.0209	0.0194	0.0197	0.0149	0.015	0.0186	0.0152	0.0161	0.0155
Cer(d20:1_24:1)	Cer	acylsphingosines	581	M+H	Cer(d44:2)	(d20:1_24:1)	(d44:2)	675.653	21.905	C44 H85 N1 O3	2	2	0	100	A	0.0084	0.009	0.0102	0.0082	0.0083	0.009	0.0082	0.0082	0.0084	0.0068	0.0083	0.008	0.0079	0.0081	0.0075	0.0078	0.0081	0.0077	0.0085	0.0073	0.0085
ChE(14:0)	ChE	sterolEsters	1624	M+NH4	ChE(14:0)	(14:0)	(14:0)	596.553	23.846	C41 H72 O2	1	1	0	66.7	A	0.0259	0.0335	0.0242	0.0257	0.0253	0.0237	0.023	0.0311	0.0282	0.0249	0.0256	0.0317	0.0306	0.0299	0.0347	0.0272	0.0255	0.0215	0.0245	0.0331	0.0284
ChE(15:0)	ChE	sterolEsters	1630	M+NH4	ChE(15:0)	(15:0)	(15:0)	610.569	24.026	C42 H74 O2	1	1	0	100	A	0.0121	0.0126	0.0133	0.0204	0.019	0.016	0.0123	0.0215	0.0212	0.0192	0.0243	0.0239	0.0219	0.0255	0.0234	0.0833	0.0891	0.0642	0.0415	0.0431	0.0461
ChE(16:1)	ChE	sterolEsters	1636	M+NH4	ChE(16:1)	(16:1)	(16:1)	622.569	23.809	C43 H74 O2	1	1	0	100	A	0.1615	0.1731	0.1459	0.1558	0.1486	0.1485	0.1537	0.1623	0.173	0.1626	0.1731	0.2033	0.2202	0.198	0.2198	0.1676	0.1429	0.1482	0.1652	0.1845	0.1929
ChE(16:0)	ChE	sterolEsters	1639	M+NH4	ChE(16:0)	(16:0)	(16:0)	624.585	24.239	C43 H76 O2	1	1	0	100	A	0.2648	0.2106	0.2909	0.2676	0.2843	0.2591	0.2369	0.2875	0.237	0.2408	0.2638	0.2605	0.2608	0.3066	0.2627	0.2507	0.2564	0.2441	0.2709	0.2461	0.2689
ChE(17:0)	ChE	sterolEsters	1650	M+NH4	ChE(17:0)	(17:0)	(17:0)	638.6	24.399	C44 H78 O2	1	1	0	100	A	0.0165	0.02	0.0204	0.0261	0.0264	0.0211	0.0206	0.026	0.0255	0.029	0.0319	0.036	0.0339	0.0353	0.0369	0.0643	0.0582	0.0511	0.0394	0.0405	0.0451
ChE(18:3)	ChE	sterolEsters	1653	M+NH4	ChE(18:3)	(18:3)	(18:3)	646.569	23.543	C45 H74 O2	1	1	0	100	A	0.2035	0.2305	0.2427	0.1995	0.1936	0.1825	0.1947	0.2271	0.2438	0.1669	0.2077	0.1967	0.2102	0.2413	0.203	0.1865	0.164	0.2122	0.2318	0.1901	0.25
ChE(18:2)	ChE	sterolEsters	1790	M+NH4	ChE(18:2)	(18:2)	(18:2)	648.585	23.838	C45 H76 O2	1	1	0	100	A	3.3603	3.6929	3.5973	3.3803	3.3239	3.274	3.3058	3.6649	3.7184	3.3783	3.5705	3.8321	4.0645	3.9537	4.0535	3.2958	2.9818	2.941	3.3891	4.1146	4.0179
ChE(18:1)	ChE	sterolEsters	1888	M+NH4	ChE(18:1)	(18:1)	(18:1)	650.6	24.048	C45 H78 O2	1	1	0	66.7	A	0.0196	0.0199	0.0169	0.0241	0.0295	0.0231	0.0224	0.0231	0.0289	0.0319	0.0385	0.0314	0.0389	0.0404	0.0362	0.0233	0.0191	0.0222	0.0298	0.0333	0.0361
ChE(18:1)	ChE	sterolEsters	1890	M+NH4	ChE(18:1)	(18:1)	(18:1)	650.6	24.188	C45 H78 O2	1	1	0	100	A	0.5634	0.6576	0.6548	0.5583	0.5097	0.5878	0.5417	0.5996	0.5853	0.4561	0.4732	0.5369	0.5645	0.5879	0.5797	0.5407	0.5351	0.5203	0.5242	0.5399	0.5623
ChE(18:0)	ChE	sterolEsters	1895	M+NH4	ChE(18:0)	(18:0)	(18:0)	652.616	24.626	C45 H80 O2	1	1	0	100	A	0.0874	0.0845	0.0918	0.086	0.0954	0.0861	0.0855	0.1045	0.0927	0.0869	0.1024	0.1225	0.1297	0.1297	0.1444	0.0943	0.0918	0.0834	0.0819	0.1067	0.1116
ChE(19:3)	ChE	sterolEsters	2073	M+NH4	ChE(19:3)	(19:3)	(19:3)	660.585	23.645	C46 H76 O2	1	1	0	66.7	A	0.0237	0.0266	0.0276	0.0223	0.0241	0.0256	0.0286	0.0282	0.0333	0.0223	0.0259	0.0298	0.0387	0.0337	0.0289	0.0266	0.0254	0.0246	0.029	0.0331	0.0313
ChE(19:1)	ChE	sterolEsters	1928	M+NH4	ChE(19:1)	(19:1)	(19:1)	664.616	24.332	C46 H80 O2	1	1	0	100	A	0.0299	0.0318	0.033	0.0418	0.0366	0.0338	0.0322	0.037	0.0374	0.0419	0.046	0.0463	0.057	0.0557	0.0549	0.0362	0.0358	0.0342	0.042	0.0442	0.0525
ChE(20:5)	ChE	sterolEsters	1929	M+NH4	ChE(20:5)	(20:5)	(20:5)	670.569	23.359	C47 H74 O2	1	1	0	100	A	0.18	0.1894	0.2186	0.1964	0.1927	0.1945	0.1851	0.1856	0.2023	0.1514	0.1842	0.1746	0.2004	0.1904	0.2073	0.1752	0.1671	0.1591	0.1977	0.218	0.207
ChE(20:4)	ChE	sterolEsters	1953	M+NH4	ChE(20:4)	(20:4)	(20:4)	672.585	23.645	C47 H76 O2	1	1	0	100	A	2.2702	2.3894	2.5644	2.2542	2.4342	2.383	2.2888	2.5025	2.9032	2.3117	2.544	2.7182	3.0848	2.8086	2.9195	2.053	2.1524	2.0195	2.5768	2.4723	2.8122
ChE(20:3)	ChE	sterolEsters	2002	M+NH4	ChE(20:3)	(20:3)	(20:3)	674.6	23.885	C47 H78 O2	1	1	0	100	A	0.3343	0.3507	0.3498	0.3661	0.3697	0.3211	0.3293	0.3744	0.3908	0.3616	0.3563	0.414	0.4334	0.4237	0.4244	0.3343	0.2988	0.3066	0.3611	0.3221	0.4397
ChE(20:2)	ChE	sterolEsters	2003	M+NH4	ChE(20:2)	(20:2)	(20:2)	676.616	24.069	C47 H80 O2	1	1	0	100	A	0.015	0.0146	0.0187	0.0204	0.0157	0.0129	0.0327	0.0356	0.0332	0.0198	0.0179	0.0194	0.0354	0.0267	0.0357	0.0162	0.0155	0.0145	0.0281	0.0271	0.0292
ChE(20:2)	ChE	sterolEsters	2004	M+NH4	ChE(20:2)	(20:2)	(20:2)	676.616	24.208	C47 H80 O2	1	1	0	100	A	0.1454	0.1648	0.1697	0.1299	0.1189	0.1394	0.1319	0.1456	0.1477	0.1194	0.1132	0.1378	0.1298	0.159	0.1347	0.1421	0.1287	0.1268	0.1421	0.134	0.1428
ChE(20:1)	ChE	sterolEsters	2008	M+NH4	ChE(20:1)	(20:1)	(20:1)	678.631	24.565	C47 H82 O2	1	1	0	100	A	0.0834	0.0899	0.0955	0.101	0.0985	0.0916	0.0903	0.0958	0.1099	0.1006	0.0978	0.1201	0.1276	0.1275	0.1278	0.0938	0.0878	0.0821	0.1046	0.1083	0.113
ChE(21:5)	ChE	sterolEsters	2011	M+NH4	ChE(21:5)	(21:5)	(21:5)	684.585	23.463	C48 H76 O2	1	1	0	66.7	A	0.0157	0.0179	0.0195	0.0184	0.0198	0.0198	0.0167	0.0181	0.0191	0.0198	0.0232	0.024	0.0279	0.0249	0.0257	0.0151	0.0162	0.0178	0.0232	0.0247	0.0242
ChE(21:4)	ChE	sterolEsters	2013	M+NH4	ChE(21:4)	(21:4)	(21:4)	686.6	23.768	C48 H78 O2	1	1	0	100	A	0.0506	0.056	0.0572	0.056	0.0551	0.0567	0.0544	0.0541	0.0543	0.0607	0.0637	0.067	0.0742	0.072	0.0728	0.0534	0.0534	0.0561	0.0642	0.0629	0.07
ChE(22:6)	ChE	sterolEsters	2020	M+NH4	ChE(22:6)	(22:6)	(22:6)	696.585	23.471	C49 H76 O2	1	1	0	66.7	A	0.788	0.9369	0.8938	0.8938	0.8671	0.9216	0.8209	0.8558	0.9291	0.9544	0.8361	1.0817	1.2038	1.1102	1.1328	0.7466	0.7707	0.7872	1.0418	0.9533	1.1194
ChE(22:5)	ChE	sterolEsters	2023	M+NH4	ChE(22:5)	(22:5)	(22:5)	698.6	23.639	C49 H78 O2	1	1	0	100	A	0.2848	0.2861	0.2956	0.2625	0.2665	0.2651	0.2641	0.287	0.3258	0.2452	0.2831	0.2913	0.3481	0.3128	0.3255	0.2353	0.2743	0.2351	0.2907	0.2841	0.3365
ChE(22:5)	ChE	sterolEsters	2024	M+NH4	ChE(22:5)	(22:5)	(22:5)	698.6	23.75	C49 H78 O2	1	1	0	66.7	A	0.0471	0.0543	0.0524	0.0607	0.055	0.0607	0.0541	0.0548	0.0601	0.057	0.0609	0.0618	0.0793	0.07	0.0823	0.0602	0.0516	0.0488	0.061	0.0677	0.077
ChE(22:4)	ChE	sterolEsters	2035	M+NH4	ChE(22:4)	(22:4)	(22:4)	700.616	23.927	C49 H80 O2	1	1	0	100	A	0.6204	0.6359	0.6615	0.751	0.7378	0.6579	0.6032	0.5137	0.6646	0.582	0.7249	0.852	0.9643	0.9196	0.8846	0.4859	0.599	0.561	0.7558	0.6621	0.8916
ChE(22:3)	ChE	sterolEsters	2038	M+NH4	ChE(22:3)	(22:3)	(22:3)	702.631	24.236	C49 H82 O2	1	1	0	100	A	0.0407	0.0403	0.0544	0.0401	0.0411	0.0406	0.0431	0.0424	0.0439	0.0391	0.0332	0.0409	0.0398	0.0456	0.0419	0.0335	0.039	0.042	0.0417	0.0445	0.0488
ChE(22:2)	ChE	sterolEsters	2040	M+NH4	ChE(22:2)	(22:2)	(22:2)	704.647	24.565	C49 H84 O2	1	1	0	100	A	0.0848	0.0898	0.0902	0.0967	0.0912	0.0823	0.0782	0.0929	0.0976	0.089	0.0952	0.1102	0.1147	0.1134	0.1164	0.0849	0.0813	0.0793	0.0959	0.0997	0.1042
ChE(22:1)	ChE	sterolEsters	2046	M+NH4	ChE(22:1)	(22:1)	(22:1)	706.663	24.972	C49 H86 O2	1	1	0	100	A	0.0299	0.0346	0.0354	0.0329	0.0315	0.0333	0.0324	0.0335	0.0354	0.0309	0.0301	0.0367	0.0402	0.0334	0.0391	0.031	0.0287	0.0288	0.0349	0.0305	0.0387
ChE(24:6)	ChE	sterolEsters	2050	M+NH4	ChE(24:6)	(24:6)	(24:6)	724.616	23.705	C51 H80 O2	1	1	0	100	A	0.0281	0.0248	0.0272	0.0292	0.0287	0.026	0.0225	0.0258	0.0295	0.0252	0.0295	0.0298	0.039	0.0344	0.0354	0.0235	0.026	0.023	0.0296	0.0289	0.0348
ChE(24:5)	ChE	sterolEsters	2056	M+NH4	ChE(24:5)	(24:5)	(24:5)	726.631	23.976	C51 H82 O2	1	1	0	100	A	0.041	0.0449	0.0494	0.0504	0.0531	0.0524	0.0455	0.045	0.0487	0.0494	0.0608	0.0635	0.0671	0.0628	0.0609	0.0451	0.0464	0.0437	0.0587	0.0586	0.065
ChE(24:4)	ChE	sterolEsters	2062	M+NH4	ChE(24:4)	(24:4)	(24:4)	728.647	24.264	C51 H84 O2	1	1	0	100	A	0.1213	0.1394	0.1387	0.1472	0.1426	0.1043	0.1247	0.1407	0.1399	0.1245	0.1309	0.1548	0.1818	0.1346	0.1504	0.1176	0.1178	0.1198	0.1393	0.147	0.1565
ChE(24:2)	ChE	sterolEsters	2065	M+NH4	ChE(24:2)	(24:2)	(24:2)	732.678	24.977	C51 H88 O2	1	1	0	100	A	0.0373	0.0429	0.0401	0.0386	0.0377	0.0378	0.0399	0.0406	0.0427	0.0346	0.0359	0.0427	0.0438	0.0399	0.0459	0.0341	0.0323	0.0365	0.0415	0.0375	0.0479
ChE(24:1)	ChE	sterolEsters	2069	M+NH4	ChE(24:1)	(24:1)	(24:1)	734.694	25.423	C51 H90 O2	1	1	0	100	A	0.031	0.0305	0.0261	0.0294	0.0258	0.0238	0.0285	0.031	0.0326	0.021	0.0261	0.0332	0.0316	0.0344	0.0287	0.0272	0.0242	0.0262	0.0287	0.0277	0.0296
ChE(26:4)	ChE	sterolEsters	2071	M+NH4	ChE(26:4)	(26:4)	(26:4)	756.678	24.611	C53 H88 O2	1	1	0	100	A	0.0256	0.0268	0.0297	0.0303	0.0276	0.0277	0.028	0.0312	0.0294	0.0233	0.0227	0.0312	0.031	0.0316	0.0338	0.0222	0.026	0.0233	0.0302	0.0326	0.0341
Co(Q8)	Co	Coenzyme Q	1757	M+NH4	Co(Q8)	(Q8)	(Q8)	726.559	21.712	C49 H74 O4	1	1	0	100	A	0.03	0.031	0.0325	0.0304	0.032	0.0289	0.0282	0.0297	0.0291	0.0287	0.0362	0.0303	0.0292	0.028	0.0296	0.0207	0.032	0.0287	0.0273	0.0291	0.0305
Co(Q9)	Co	Coenzyme Q	1874	M+NH4	Co(Q9)	(Q9)	(Q9)	794.621	22.24	C54 H82 O4	2	1	0	100	A	1.0311	1.1593	1.1968	0.9934	1.0818	0.9875	1.0614	1.0286	1.1151	0.9653	1.3789	1.1245	1.1494	0.8881	1.1964	0.7415	1.269	0.9204	0.9979	0.9475	0.9159
Co(Q10)	Co	Coenzyme Q	1880	M+NH4	Co(Q10)	(Q10)	(Q10)	862.684	22.697	C59 H90 O4	2	1	0	100	A	0.3422	0.3515	0.3776	0.333	0.3331	0.3449	0.306	0.324	0.3088	0.3459	0.4614	0.3815	0.3562	0.3382	0.3533	0.2939	0.401	0.313	0.3273	0.3345	0.2646
DG(12:0_18:2)	DG	diacyl	2036	M+NH4	DG(30:2)	(12:0_18:2)	(30:2)	536.444	15.856	C33 H60 O5	1	1	1	100	A	0.0062	0.0067	0.0075	0.0059	0.0077	0.0067	0.006	0.0065	0.006	0.0049	0.0053	0.0059	0.0072	0.006	0.0051	0.0061	0.0064	0.0054	0.0062	0.0059	0.0052
DG(14:0_16:1)	DG	diacyl	2053	M+NH4	DG(30:1)	(14:0_16:1)	(30:1)	538.46	17.966	C33 H62 O5	1	1	1	66.7	A	0.0118	0.0117	0.016	0.0143	0.0158	0.0126	0.0115	0.0132	0.0133	0.0098	0.0092	0.0112	0.0097	0.0126	0.0122	0.0097	0.0104	0.0126	0.0122	0.0115	0.0113
DG(14:0_16:0)	DG	diacyl	2064	M+NH4	DG(30:0)	(14:0_16:0)	(30:0)	540.475	19.973	C33 H64 O5	1	1	1	100	A	0.0284	0.0282	0.0332	0.0205	0.0265	0.0204	0.0218	0.029	0.0263	0.0259	0.0245	0.0251	0.0295	0.025	0.0297	0.0274	0.0248	0.024	0.0263	0.0241	0.025
DG(15:0_16:0)	DG	diacyl	2072	M+NH4	DG(31:0)	(15:0_16:0)	(31:0)	554.491	20.503	C34 H66 O5	1	1	1	100	A	0.0086	0.009	0.0107	0.0061	0.008	0.0076	0.0066	0.009	0.0071	0.0093	0.009	0.0094	0.0093	0.009	0.0073	0.0083	0.0091	0.0074	0.0074	0.0087	0.0077
DG(O-16:0_16:0)	DG	alkyl-acyl	2047	M+NH4	DG(O-32:0)	(O-16:0_16:0)	(O-32:0)	554.527	21.478	C35 H70 O4	2	1	0	100	A	0.013	0.0141	0.0164	0.0094	0.0101	0.009	0.0088	0.0116	0.0094	0.0116	0.0126	0.0115	0.0135	0.0127	0.0138	0.0127	0.0138	0.0108	0.0105	0.0086	0.0097
DG(16:1_16:1)	DG	diacyl	2079	M+NH4	DG(32:2)	(16:1_16:1)	(32:2)	564.475	18.325	C35 H64 O5	1	2	1	100	A	0.0227	0.0241	0.0271	0.0235	0.0234	0.0205	0.0225	0.0225	0.0248	0.0205	0.0195	0.0196	0.0265	0.0218	0.0263	0.0221	0.0221	0.018	0.0205	0.023	0.0239
DG(14:0_18:2)	DG	diacyl	2081	M+NH4	DG(32:2)	(14:0_18:2)	(32:2)	564.475	18.624	C35 H64 O5	2	2	1	100	A	0.0893	0.0961	0.1046	0.0823	0.103	0.0881	0.0817	0.0854	0.0758	0.0677	0.0695	0.0712	0.0833	0.0766	0.08	0.0727	0.0748	0.0637	0.0791	0.0736	0.0801
DG(14:0_18:1)	DG	diacyl	2134	M+NH4	DG(32:1)	(14:0_18:1)	(32:1)	566.491	20.115	C35 H66 O5	1	2	1	100	A	0.1561	0.1686	0.1873	0.1444	0.1775	0.1551	0.143	0.1649	0.153	0.1308	0.1362	0.1417	0.1564	0.1433	0.1607	0.1368	0.156	0.1413	0.1513	0.145	0.1513
DG(15:0_18:2)	DG	diacyl	2139	M+NH4	DG(33:2)	(15:0_18:2)	(33:2)	578.491	19.759	C36 H66 O5	1	1	1	100	A	0.0048	0.0054	0.0056	0.005	0.0057	0.0052	0.0051	0.0049	0.0055	0.0046	0.0047	0.0047	0.0062	0.0045	0.0043	0.0052	0.0048	0.0048	0.005	0.0049	0.0047
DG(O-13:0_21:2)	DG	alkyl-acyl	2141	M+NH4	DG(O-34:2)	(O-13:0_21:2)	(O-34:2)	578.527	21.072	C37 H70 O4	1	2	0	100	B	0.0291	0.0268	0.0372	0.0252	0.0306	0.0275	0.0193	0.0251	0.0217	0.0193	0.021	0.0235	0.0243	0.0274	0.0271	0.0206	0.0254	0.0243	0.0233	0.0221	0.0228
DG(O-13:0_21:1)	DG	alkyl-acyl	2076	M+NH4	DG(O-34:1)	(O-13:0_21:1)	(O-34:1)	580.543	21.495	C37 H72 O4	2	1	0	100	B	0.0452	0.0493	0.0603	0.0432	0.0511	0.0473	0.0393	0.0446	0.0422	0.0405	0.0407	0.0377	0.0493	0.044	0.0494	0.0425	0.0441	0.04	0.0415	0.0344	0.0422
DG(16:0_17:0)	DG	diacyl	2146	M+NH4	DG(33:0)	(16:0_17:0)	(33:0)	582.522	21.217	C36 H70 O5	1	1	1	100	A	0.0084	0.0078	0.0097	0.0056	0.0074	0.007	0.0068	0.0083	0.0076	0.0076	0.0083	0.0078	0.008	0.0069	0.0075	0.0091	0.0092	0.0069	0.0074	0.0072	0.0068
DG(O-13:0_21:0)	DG	alkyl-acyl	2095	M+NH4	DG(O-34:0)	(O-13:0_21:0)	(O-34:0)	582.559	21.912	C37 H74 O4	2	2	0	100	A	0.008	0.0117	0.0135	0.0068	0.0078	0.0065	0.0079	0.0111	0.0085	0.0091	0.0101	0.0123	0.0109	0.0103	0.0113	0.0097	0.0113	0.0089	0.0091	0.0073	0.0085
DG(16:1_18:3)	DG	diacyl	2567	M+NH4	DG(34:4)	(16:1_18:3)	(34:4)	588.475	17.145	C37 H64 O5	1	1	2	66.7	A	0.0028	0.005	0.0052	0.0041	0.0049	0.0025	0.0017	0.0056	0.0041	0.0019	0.003	0.0033	0.0023	0.0031	0.0053	0.0021	0.003	0.0023	0.0034	0.0033	0.0045
DG(16:1_18:2)	DG	diacyl	2161	M+NH4	DG(34:3)	(16:1_18:2)	(34:3)	590.491	18.987	C37 H66 O5	2	3	1	100	A	0.1285	0.1254	0.1522	0.1229	0.1532	0.1284	0.118	0.1394	0.1218	0.1083	0.1117	0.1037	0.1308	0.1132	0.1375	0.12	0.113	0.1037	0.1163	0.1141	0.1184
DG(16:1_18:2)	DG	diacyl	2166	M+NH4	DG(34:3)	(16:1_18:2)	(34:3)	590.491	19.18	C37 H66 O5	1	3	1	66.7	A	0.0114	0.01	0.0111	0.0094	0.0139	0.0111	0.0078	0.0098	0.0136	0.0071	0.0088	0.0109	0.0206	0.0175	0.0185	0.0122	0.0104	0.0087	0.0119	0.0108	0.0097
DG(16:0_18:3)	DG	diacyl	2168	M+NH4	DG(34:3)	(16:0_18:3)	(34:3)	590.491	19.483	C37 H66 O5	1	3	2	100	A	0.0428	0.0425	0.0454	0.0368	0.0427	0.0362	0.0374	0.0368	0.0363	0.0293	0.0319	0.0338	0.0426	0.0368	0.0363	0.036	0.036	0.032	0.0387	0.0328	0.0357
DG(16:0_18:2)	DG	diacyl	2188	M+NH4	DG(34:2)	(16:0_18:2)	(34:2)	592.507	20.356	C37 H68 O5	2	2	1	100	A	1.0692	1.1589	1.3311	1.0322	1.1952	1.0585	0.7128	1.0378	0.8719	0.7245	0.9221	0.9518	0.8036	0.9166	1.0671	0.7777	1.0572	0.9095	0.9149	0.7973	0.8044
DG(16:0_18:1)	DG	diacyl	2196	M+NH4	DG(34:1)	(16:0_18:1)	(34:1)	594.522	20.965	C37 H70 O5	2	1	4	100	A	0.594	0.6164	0.7345	0.5398	0.6362	0.5559	0.4377	0.4556	0.4649	0.481	0.5048	0.5117	0.5837	0.5393	0.6042	0.5596	0.5469	0.509	0.5111	0.4964	0.5532
DG(16:0_18:0)	DG	diacyl	2203	M+NH4	DG(34:0)	(16:0_18:0)	(34:0)	596.538	21.474	C37 H72 O5	1	1	2	66.7	A	0.0958	0.1024	0.1217	0.0801	0.0925	0.0898	0.0791	0.1	0.0812	0.0983	0.108	0.0982	0.1233	0.1101	0.1182	0.0897	0.1037	0.082	0.0954	0.0808	0.0856
DG(O-16:0_20:4)	DG	alkyl-acyl	2214	M+NH4	DG(O-36:4)	(O-16:0_20:4)	(O-36:4)	602.527	20.98	C39 H70 O4	1	1	0	100	B	0.0362	0.0385	0.0437	0.0318	0.0393	0.0325	0.027	0.0303	0.0293	0.0281	0.0307	0.0285	0.0334	0.0343	0.0384	0.0337	0.0322	0.0291	0.0298	0.0299	0.0326
DG(17:1_18:1)	DG	diacyl	2215	M+NH4	DG(35:2)	(17:1_18:1)	(35:2)	606.522	20.78	C38 H70 O5	1	1	0	100	A	0.0119	0.0096	0.0099	0.0082	0.0103	0.0122	0.0061	0.0076	0.0069	0.0076	0.0064	0.0093	0.0082	0.0088	0.0082	0.0077	0.0084	0.0074	0.0078	0.0069	0.0068
DG(17:0_18:1)	DG	diacyl	2221	M+NH4	DG(35:1)	(17:0_18:1)	(35:1)	608.538	21.259	C38 H72 O5	1	1	1	66.7	A	0.0112	0.0128	0.0149	0.0116	0.0134	0.0119	0.0111	0.0117	0.0126	0.0109	0.0104	0.0108	0.0132	0.0116	0.0121	0.0122	0.0122	0.011	0.0119	0.0106	0.0119
DG(18:2_18:3)	DG	diacyl	2235	M+NH4	DG(36:5)	(18:2_18:3)	(36:5)	614.491	17.732	C39 H66 O5	1	2	3	100	A	0.0443	0.0469	0.0573	0.0421	0.0512	0.0411	0.0391	0.045	0.0439	0.0372	0.0375	0.0382	0.0396	0.042	0.0421	0.0355	0.0376	0.0352	0.0414	0.0384	0.0368
DG(16:0_20:5)	DG	diacyl	2236	M+NH4	DG(36:5)	(16:0_20:5)	(36:5)	614.491	19.194	C39 H66 O5	1	2	1	100	A	0.0107	0.012	0.0145	0.0109	0.012	0.0107	0.0098	0.0116	0.0116	0.0103	0.0099	0.0094	0.012	0.0106	0.011	0.0106	0.0104	0.0086	0.0101	0.0109	0.0111
DG(18:1_18:3)	DG	diacyl	2242	M+NH4	DG(36:4)	(18:1_18:3)	(36:4)	616.507	19.656	C39 H68 O5	1	3	2	66.7	A	0.0274	0.0306	0.0329	0.0354	0.0423	0.0377	0.0365	0.0371	0.0387	0.0233	0.0249	0.0267	0.0362	0.0329	0.0372	0.0273	0.0275	0.023	0.0292	0.0263	0.0282
DG(18:1_18:2)	DG	diacyl	2256	M+NH4	DG(36:3)	(18:1_18:2)	(36:3)	618.522	20.446	C39 H70 O5	2	2	1	100	A	1.0671	1.1634	1.3132	1.0581	1.1626	1.0227	0.9783	1.0744	1.0854	0.8945	0.8839	0.8869	1.0913	0.9745	1.0354	0.9533	0.9873	0.8712	1.0261	0.9547	0.9984
DG(18:1_18:1)	DG	diacyl	2267	M+NH4	DG(36:2)	(18:1_18:1)	(36:2)	620.538	21.065	C39 H72 O5	1	2	1	100	A	0.6605	0.6202	0.8743	0.5945	0.6739	0.6574	0.535	0.6147	0.5752	0.5094	0.5864	0.5555	0.5343	0.5156	0.5744	0.5893	0.6775	0.564	0.6083	0.5531	0.5722
DG(18:0_18:1)	DG	diacyl	2276	M+NH4	DG(36:1)	(18:0_18:1)	(36:1)	622.554	21.509	C39 H74 O5	2	2	1	66.7	A	0.1176	0.1266	0.1505	0.113	0.1338	0.1193	0.105	0.1186	0.1144	0.116	0.1145	0.1115	0.1367	0.117	0.1321	0.1143	0.1136	0.1047	0.1163	0.113	0.1128
DG(O-18:2_20:4)	DG	alkyl-acyl	2288	M+NH4	DG(O-38:6)	(O-18:2_20:4)	(O-38:6)	626.527	20.399	C41 H70 O4	1	2	0	66.7	B	0.0083	0.0098	0.0107	0.0083	0.0088	0.0068	0.0088	0.0079	0.0072	0.0064	0.0064	0.0076	0.0073	0.0071	0.0066	0.0063	0.0078	0.0066	0.0056	0.0069	0.0062
DG(O-16:0_22:6)	DG	alkyl-acyl	2289	M+NH4	DG(O-38:6)	(O-16:0_22:6)	(O-38:6)	626.527	20.782	C41 H70 O4	1	2	0	100	B	0.0238	0.0229	0.0241	0.0179	0.0255	0.0239	0.0164	0.0197	0.0241	0.0161	0.0135	0.0201	0.0255	0.0207	0.0226	0.0206	0.018	0.0167	0.0188	0.0164	0.0207
DG(O-18:1_20:4)	DG	alkyl-acyl	2299	M+NH4	DG(O-38:5)	(O-18:1_20:4)	(O-38:5)	628.543	21.008	C41 H72 O4	1	2	0	100	B	0.0729	0.079	0.0937	0.0661	0.0845	0.0711	0.0571	0.0631	0.0592	0.0623	0.0644	0.0625	0.0699	0.0722	0.0635	0.0694	0.0696	0.056	0.0625	0.0617	0.0691
DG(17:0_20:4)	DG	diacyl	2302	M+NH4	DG(37:4)	(17:0_20:4)	(37:4)	630.522	20.649	C40 H70 O5	1	1	1	66.7	A	0.0079	0.0068	0.0095	0.0062	0.0079	0.0068	0.0063	0.0073	0.007	0.0061	0.0059	0.0056	0.0064	0.0059	0.0069	0.0054	0.0064	0.0048	0.0064	0.0056	0.0058
DG(18:2_20:4)	DG	diacyl	2319	M+NH4	DG(38:6)	(18:2_20:4)	(38:6)	640.507	19.068	C41 H68 O5	2	3	1	100	A	0.0543	0.0532	0.0621	0.0496	0.0618	0.0544	0.051	0.0527	0.0458	0.0461	0.0477	0.041	0.0553	0.0474	0.0502	0.0461	0.0486	0.0363	0.0461	0.0465	0.0442
DG(16:0_22:6)	DG	diacyl	2321	M+NH4	DG(38:6)	(16:0_22:6)	(38:6)	640.507	19.879	C41 H68 O5	1	3	1	100	A	0.0849	0.0805	0.0967	0.0813	0.0996	0.0846	0.0751	0.0805	0.0781	0.0698	0.0691	0.0745	0.0797	0.0793	0.0841	0.0694	0.0775	0.0596	0.0795	0.0714	0.0694
DG(18:1_20:3)	DG	diacyl	2325	M+NH4	DG(38:4)	(18:1_20:3)	(38:4)	644.538	20.576	C41 H72 O5	1	3	1	100	A	0.0523	0.0541	0.0626	0.0493	0.0588	0.0526	0.0502	0.0531	0.0491	0.0389	0.0414	0.039	0.0487	0.0447	0.0476	0.0437	0.051	0.0383	0.051	0.0443	0.0442
DG(16:0_22:4)	DG	diacyl	2326	M+NH4	DG(38:4)	(16:0_22:4)	(38:4)	644.538	20.807	C41 H72 O5	1	3	1	100	A	0.0155	0.0169	0.0188	0.0166	0.0188	0.0156	0.0153	0.0174	0.018	0.0127	0.0174	0.0147	0.0204	0.0146	0.017	0.0128	0.015	0.0129	0.0186	0.0126	0.0132
DG(18:0_20:4)	DG	diacyl	2328	M+NH4	DG(38:4)	(18:0_20:4)	(38:4)	644.538	21.007	C41 H72 O5	2	3	1	100	A	0.3896	0.4133	0.4739	0.3512	0.4241	0.3905	0.3175	0.3364	0.3198	0.3468	0.3355	0.3313	0.3551	0.3445	0.3035	0.3592	0.3729	0.2954	0.3476	0.3179	0.3748
DG(20:1_18:2)	DG	diacyl	2336	M+NH4	DG(38:3)	(20:1_18:2)	(38:3)	646.554	21.122	C41 H74 O5	1	2	1	100	A	0.043	0.0456	0.0591	0.04	0.0467	0.0408	0.0336	0.0376	0.0374	0.034	0.036	0.0341	0.0306	0.031	0.0457	0.0362	0.0429	0.0366	0.0335	0.0334	0.0373
DG(18:0_20:3)	DG	diacyl	2339	M+NH4	DG(38:3)	(18:0_20:3)	(38:3)	646.554	21.253	C41 H74 O5	2	2	1	100	A	0.0309	0.0325	0.0352	0.029	0.0341	0.0307	0.0267	0.0291	0.0301	0.0275	0.0264	0.0265	0.0291	0.0274	0.0293	0.0278	0.027	0.0254	0.0336	0.026	0.0298
DG(18:1_20:1)	DG	diacyl	2340	M+NH4	DG(38:2)	(18:1_20:1)	(38:2)	648.569	21.522	C41 H76 O5	1	1	1	100	A	0.0311	0.0332	0.0395	0.0327	0.0382	0.0344	0.0289	0.0336	0.0304	0.0283	0.0308	0.0279	0.0334	0.0304	0.0316	0.0291	0.031	0.0282	0.0297	0.0289	0.0282
DG(20:0_18:1)	DG	diacyl	2341	M+NH4	DG(38:1)	(20:0_18:1)	(38:1)	650.585	21.889	C41 H78 O5	1	2	1	66.7	A	0.0059	0.0079	0.0091	0.0074	0.0082	0.007	0.0073	0.0081	0.0077	0.0065	0.007	0.0072	0.0083	0.0085	0.0078	0.0067	0.0065	0.0057	0.0073	0.0062	0.0075
DG(O-18:1_22:6)	DG	alkyl-acyl	2347	M+NH4	DG(O-40:7)	(O-18:1_22:6)	(O-40:7)	652.543	20.821	C43 H72 O4	1	1	0	100	B	0.0146	0.0153	0.0202	0.0139	0.0173	0.014	0.0145	0.0116	0.0128	0.0107	0.0116	0.0125	0.017	0.0141	0.0165	0.0128	0.0115	0.0116	0.0127	0.0093	0.012
DG(O-18:1_22:5)	DG	alkyl-acyl	2348	M+NH4	DG(O-40:6)	(O-18:1_22:5)	(O-40:6)	654.559	21.04	C43 H74 O4	1	2	0	100	B	0.0131	0.0143	0.0172	0.0119	0.0147	0.0122	0.0099	0.0107	0.0097	0.0068	0.0089	0.009	0.0114	0.0103	0.0125	0.0089	0.0126	0.0103	0.0085	0.0098	0.0112
DG(O-18:0_22:6)	DG	alkyl-acyl	2349	M+NH4	DG(O-40:6)	(O-18:0_22:6)	(O-40:6)	654.559	21.394	C43 H74 O4	1	2	0	100	B	0.0262	0.0256	0.0319	0.0231	0.0288	0.0233	0.0233	0.0261	0.024	0.0212	0.024	0.0216	0.0286	0.0241	0.0252	0.0239	0.0235	0.0177	0.0233	0.022	0.0232
DG(O-18:0_22:5)	DG	alkyl-acyl	2350	M+NH4	DG(O-40:5)	(O-18:0_22:5)	(O-40:5)	656.574	21.549	C43 H76 O4	1	1	0	100	B	0.0081	0.0097	0.0115	0.0094	0.0099	0.0071	0.0084	0.0081	0.009	0.0089	0.0068	0.0076	0.0086	0.0093	0.0106	0.0069	0.0094	0.0067	0.0089	0.0085	0.0089
DG(18:2_22:6)	DG	diacyl	2367	M+NH4	DG(40:8)	(18:2_22:6)	(40:8)	664.507	18.369	C43 H68 O5	2	1	1	100	A	0.0785	0.0886	0.1017	0.0727	0.0915	0.0806	0.067	0.0832	0.0708	0.0589	0.07	0.0687	0.0696	0.0725	0.0816	0.0571	0.069	0.0584	0.067	0.0642	0.0671
DG(18:2_22:5)	DG	diacyl	2386	M+NH4	DG(40:7)	(18:2_22:5)	(40:7)	666.522	19.304	C43 H70 O5	1	2	1	100	A	0.019	0.0206	0.0219	0.0172	0.0194	0.018	0.0172	0.0185	0.0174	0.0112	0.014	0.0124	0.014	0.013	0.0143	0.0144	0.0159	0.014	0.0148	0.0142	0.0159
DG(18:1_22:6)	DG	diacyl	2388	M+NH4	DG(40:7)	(18:1_22:6)	(40:7)	666.522	19.98	C43 H70 O5	1	2	1	100	A	0.046	0.0501	0.051	0.0445	0.0533	0.0491	0.0389	0.0449	0.0453	0.035	0.0393	0.0408	0.0466	0.0422	0.0461	0.0374	0.0401	0.0333	0.0406	0.0408	0.0399
DG(18:2_22:4)	DG	diacyl	2393	M+NH4	DG(40:6)	(18:2_22:4)	(40:6)	668.538	20.242	C43 H72 O5	1	4	1	100	A	0.0141	0.0148	0.0189	0.0147	0.0196	0.0158	0.0144	0.0165	0.0146	0.0121	0.0152	0.0133	0.0177	0.0133	0.0154	0.0126	0.013	0.0109	0.0143	0.0131	0.0119
DG(20:2_20:4)	DG	diacyl	2402	M+NH4	DG(40:6)	(20:2_20:4)	(40:6)	668.538	20.43	C43 H72 O5	1	4	1	100	A	0.0129	0.0148	0.0131	0.0114	0.0133	0.0124	0.0089	0.0123	0.0104	0.0099	0.0094	0.0099	0.0116	0.0108	0.0098	0.0096	0.0115	0.0085	0.0113	0.0093	0.0083
DG(18:1_22:5)	DG	diacyl	2410	M+NH4	DG(40:6)	(18:1_22:5)	(40:6)	668.538	20.604	C43 H72 O5	1	4	1	66.7	A	0.0057	0.0047	0.0092	0.004	0.0044	0.0059	0.0043	0.0054	0.0066	0.0032	0.0044	0.0044	0.0047	0.0037	0.0044	0.0048	0.004	0.0035	0.0058	0.0036	0.0048
DG(18:0_22:6)	DG	diacyl	2417	M+NH4	DG(40:6)	(18:0_22:6)	(40:6)	668.538	20.833	C43 H72 O5	1	4	1	100	A	0.0357	0.0355	0.0438	0.0321	0.0407	0.0345	0.0332	0.0331	0.0279	0.0294	0.0316	0.0344	0.04	0.0314	0.0363	0.0315	0.032	0.0245	0.0316	0.0273	0.0295
DG(18:0_22:5)	DG	diacyl	2466	M+NH4	DG(40:5)	(18:0_22:5)	(40:5)	670.554	21.036	C43 H74 O5	1	1	1	100	A	0.0456	0.0434	0.0541	0.0379	0.0469	0.0398	0.0322	0.0337	0.0326	0.0272	0.0349	0.0345	0.0363	0.0394	0.0398	0.0332	0.0408	0.0308	0.0357	0.0321	0.0368
DG(16:0_24:4)	DG	diacyl	2542	M+NH4	DG(40:4)	(16:0_24:4)	(40:4)	672.569	21.386	C43 H76 O5	1	2	0	66.7	A	0.0252	0.0251	0.0315	0.0225	0.0288	0.0254	0.0229	0.0259	0.0235	0.0227	0.025	0.0227	0.0238	0.0235	0.0265	0.024	0.0223	0.0187	0.0246	0.021	0.0251
DG(O-20:0_22:6)	DG	alkyl-acyl	2544	M+NH4	DG(O-42:6)	(O-20:0_22:6)	(O-42:6)	682.59	21.826	C45 H78 O4	1	1	0	100	B	0.0135	0.0133	0.016	0.0118	0.0143	0.0124	0.0109	0.0134	0.0129	0.0109	0.0115	0.0111	0.015	0.0138	0.0143	0.0097	0.0116	0.0086	0.0118	0.0118	0.0122
Hex1Cer(d18:1_16:0)	Hex1Cer	Ceramide monosaccharides	781	M+H	Hex1Cer(d34:1)	(d18:1_16:0)	(d34:1)	699.565	15.348	C40 H77 N1 O8	2	2	0	100	A	0.2427	0.2259	0.2367	0.1975	0.2224	0.1996	0.221	0.2213	0.2369	0.2513	0.2334	0.2423	0.2446	0.2438	0.2235	0.2721	0.29	0.2708	0.2418	0.2046	0.1746
Hex1Cer(d18:1_18:0)	Hex1Cer	Ceramide monosaccharides	793	M+H	Hex1Cer(d36:1)	(d18:1_18:0)	(d36:1)	727.596	18.065	C42 H81 N1 O8	2	2	0	100	A	0.1316	0.1518	0.1406	0.1227	0.1122	0.1442	0.1059	0.1246	0.1095	0.1565	0.1455	0.1735	0.1506	0.1674	0.1433	0.1432	0.1443	0.122	0.145	0.1518	0.1265
Hex1Cer(d18:1_20:0)	Hex1Cer	Ceramide monosaccharides	804	M+H	Hex1Cer(d38:1)	(d18:1_20:0)	(d38:1)	755.628	20.103	C44 H85 N1 O8	2	2	0	100	A	0.1829	0.2011	0.176	0.1316	0.1441	0.1468	0.1507	0.1729	0.1468	0.1753	0.1824	0.1756	0.1811	0.1882	0.1779	0.2105	0.2044	0.1865	0.1595	0.1607	0.1466
Hex1Cer(d18:1_22:0)	Hex1Cer	Ceramide monosaccharides	821	M+H	Hex1Cer(d40:1)	(d18:1_22:0)	(d40:1)	783.659	20.91	C46 H89 N1 O8	2	2	0	100	A	0.7483	0.8395	0.8385	0.5544	0.5712	0.5816	0.571	0.4737	0.547	0.7678	0.7394	0.807	0.8055	0.7634	0.8325	0.832	0.8633	0.7686	0.6074	0.7057	0.6407
Hex1Cer(d18:1_23:0)	Hex1Cer	Ceramide monosaccharides	836	M+H	Hex1Cer(d41:1)	(d18:1_23:0)	(d41:1)	797.674	21.186	C47 H91 N1 O8	2	2	0	100	A	0.2792	0.4061	0.4255	0.2447	0.28	0.2697	0.2861	0.3638	0.3193	0.3946	0.3937	0.4117	0.3961	0.3825	0.3727	0.4207	0.4402	0.3997	0.3596	0.3302	0.3124
Hex1Cer(d18:2_24:1)	Hex1Cer	Ceramide monosaccharides	856	M+H	Hex1Cer(d42:3)	(d18:2_24:1)	(d42:3)	807.659	20.261	C48 H89 N1 O8	2	2	0	100	B	0.398	0.4581	0.4399	0.4024	0.4537	0.4433	0.3867	0.3718	0.3874	0.3435	0.3133	0.3773	0.3532	0.4051	0.4207	0.3871	0.3756	0.3708	0.3928	0.3796	0.3469
Hex1Cer(d18:1_24:1)	Hex1Cer	Ceramide monosaccharides	871	M+H	Hex1Cer(d42:2)	(d18:1_24:1)	(d42:2)	809.674	20.865	C48 H91 N1 O8	2	3	0	100	A	1.3232	1.43	1.3857	1.478	1.3786	1.3919	1.2532	1.3547	1.434	1.1359	1.3036	1.3086	1.3939	1.3396	1.3992	1.3086	1.3481	1.1825	1.4041	1.4046	1.2839
Hex1Cer(d18:2_24:0)	Hex1Cer	Ceramide monosaccharides	872	M+H	Hex1Cer(d42:2)	(d18:2_24:0)	(d42:2)	809.674	20.991	C48 H91 N1 O8	2	3	0	100	B	0.0863	0.0854	0.0735	0.0955	0.1211	0.1443	0.0589	0.0723	0.0897	0.0954	0.1008	0.0808	0.111	0.0958	0.0989	0.078	0.081	0.068	0.0923	0.1191	0.0877
Hex1Cer(d18:1_24:0)	Hex1Cer	Ceramide monosaccharides	889	M+H	Hex1Cer(d42:1)	(d18:1_24:0)	(d42:1)	811.69	21.42	C48 H93 N1 O8	2	2	0	100	A	1.0356	1.0585	1.1296	0.6413	0.7588	0.7366	0.7652	0.9222	0.7659	1.0936	1.0412	1.1483	1.16	1.0919	1.1049	1.2255	1.2284	1.0684	0.8433	0.9092	0.7607
Hex2Cer(d18:1_16:0)	Hex2Cer	Ceramide disaccharides	1028	M+H	Hex2Cer(d34:1)	(d18:1_16:0)	(d34:1)	861.618	14.209	C46 H87 N1 O13	1	1	0	66.7	B	0.0716	0.0877	0.0877	0.0592	0.0625	0.0723	0.0638	0.0757	0.0635	0.0595	0.0665	0.0758	0.0826	0.0781	0.0712	0.0727	0.0847	0.079	0.0713	0.0654	0.0716
Hex2Cer(d18:1_22:0)	Hex2Cer	Ceramide disaccharides	1005	M+H	Hex2Cer(d40:1)	(d18:1_22:0)	(d40:1)	945.712	20.519	C52 H99 N1 O13	2	3	0	100	A	0.1215	0.1176	0.1374	0.0844	0.0962	0.0961	0.0883	0.148	0.0904	0.146	0.1476	0.1818	0.1712	0.1523	0.1607	0.1685	0.2091	0.1763	0.1126	0.1031	0.1116
Hex2Cer(d18:1_23:0)	Hex2Cer	Ceramide disaccharides	1011	M+H	Hex2Cer(d41:1)	(d18:1_23:0)	(d41:1)	959.727	20.859	C53 H101 N1 O13	2	2	0	100	B	0.0653	0.067	0.0657	0.0467	0.0511	0.0494	0.0443	0.0752	0.0443	0.0783	0.0856	0.1027	0.0962	0.0974	0.0922	0.0947	0.1236	0.1006	0.0546	0.0492	0.0745
Hex2Cer(d18:1_24:1)	Hex2Cer	Ceramide disaccharides	1014	M+H	Hex2Cer(d42:2)	(d18:1_24:1)	(d42:2)	971.727	20.474	C54 H101 N1 O13	2	2	0	100	B	0.3092	0.3206	0.3011	0.2544	0.2966	0.2853	0.2403	0.2672	0.2621	0.223	0.2799	0.3042	0.3489	0.3565	0.3274	0.2942	0.3571	0.3344	0.2787	0.2813	0.2925
Hex2Cer(d18:1_24:0)	Hex2Cer	Ceramide disaccharides	1018	M+H	Hex2Cer(d42:1)	(d18:1_24:0)	(d42:1)	973.743	21.125	C54 H103 N1 O13	2	2	0	100	A	0.1642	0.1608	0.1716	0.127	0.1144	0.1588	0.1148	0.1626	0.1469	0.239	0.2601	0.2304	0.2394	0.1974	0.2513	0.2815	0.3296	0.261	0.1514	0.1684	0.1467
LPC(P-13:0)	LPC	monoalkenyl	765	M+H	LPC(P-13:0)	(P-13:0)	(P-13:0)	437.291	6.396	C21 H44 N1 O6 P1	1	1	0	66.7	C	0.0459	0.0491	0.0503	0.0314	0.0287	0.0325	0.0449	0.0472	0.0466	0.0312	0.0306	0.0349	0.0335	0.0341	0.0329	0.0614	0.0683	0.053	0.0365	0.0319	0.0359
LPC(P-15:1)	LPC	monoalkenyl	778	M+H	LPC(P-15:1)	(P-15:1)	(P-15:1)	463.306	6.596	C23 H46 N1 O6 P1	1	1	0	66.7	C	0.0116	0.0122	0.0126	0.0091	0.0087	0.0097	0.0113	0.0121	0.0127	0.0082	0.0078	0.0097	0.01	0.0082	0.008	0.0164	0.018	0.0125	0.0091	0.0091	0.0098
LPC(14:0)	LPC	monoacyl	300	M+H	LPC(14:0)	(14:0)	(14:0)	467.301	4.648	C22 H46 N1 O7 P1	2	1	2	100	A	0.0109	0.0133	0.0131	0.0092	0.0093	0.01	0.0113	0.0118	0.012	0.0075	0.0079	0.0084	0.0089	0.0087	0.0086	0.0036	0.0043	0.0045	0.0095	0.0085	0.0094
LPC(15:0)	LPC	monoacyl	807	M+H	LPC(15:0)	(15:0)	(15:0)	481.317	5.279	C23 H48 N1 O7 P1	2	1	1	100	A	0.0159	0.0175	0.0201	0.014	0.0139	0.0136	0.015	0.0169	0.0165	0.0127	0.0131	0.0139	0.0123	0.013	0.0125	0.0098	0.0135	0.0097	0.0137	0.0129	0.013
LPC(O-16:0)	LPC	monoalkyl	370	M+H	LPC(O-16:0)	(O-16:0)	(O-16:0)	481.353	6.36	C24 H52 N1 O6 P1	2	1	1	100	A	0.1228	0.1288	0.1353	0.088	0.0839	0.0861	0.1135	0.1175	0.124	0.0816	0.0835	0.0941	0.0938	0.0902	0.0886	0.0946	0.1023	0.0981	0.0975	0.0901	0.0993
LPC(16:1)	LPC	monoacyl	816	M+H	LPC(16:1)	(16:1)	(16:1)	493.317	4.727	C24 H48 N1 O7 P1	2	1	2	100	B	0.0087	0.0096	0.0094	0.0059	0.0063	0.007	0.008	0.0079	0.0081	0.0049	0.005	0.0056	0.0065	0.0058	0.006	0.0053	0.0054	0.0062	0.0068	0.0066	0.0067
LPC(16:1)	LPC	monoacyl	817	M+H	LPC(16:1)	(16:1)	(16:1)	493.317	4.979	C24 H48 N1 O7 P1	2	1	2	100	A	0.0292	0.0395	0.0417	0.0219	0.0284	0.0307	0.0228	0.034	0.0351	0.0241	0.0181	0.0214	0.0293	0.0288	0.0262	0.0168	0.0192	0.018	0.0235	0.0282	0.0236
LPC(16:0)	LPC	monoacyl	200	M+H	LPC(16:0)	(16:0)	(16:0)	495.332	5.587	C24 H50 N1 O7 P1	4	1	3	100	A	0.2142	0.2295	0.2363	0.146	0.1426	0.1645	0.1815	0.1911	0.1946	0.1288	0.1298	0.1475	0.1447	0.1541	0.1429	0.1702	0.1837	0.1688	0.1628	0.1492	0.1627
LPC(16:0)	LPC	monoacyl	202	M+H	LPC(16:0)	(16:0)	(16:0)	495.332	5.819	C24 H50 N1 O7 P1	4	1	3	100	A	2.8875	3.2194	3.1692	2.0919	2.0705	2.207	2.6263	2.7125	2.8414	2.0816	2.0798	2.2274	1.9625	2.1088	2.1378	2.1083	2.1553	2.0141	2.165	2.1867	2.2728
LPC(P-18:2)	LPC	monoalkenyl	820	M+H	LPC(P-18:2)	(P-18:2)	(P-18:2)	503.338	6.359	C26 H50 N1 O6 P1	1	1	0	100	C	0.0061	0.0067	0.0066	0.0045	0.0036	0.0029	0.0028	0.0042	0.0045	0.0037	0.0035	0.0041	0.0037	0.0042	0.0036	0.0043	0.0046	0.0034	0.0047	0.0042	0.0043
LPC(P-18:1)	LPC	monoalkenyl	823	M+H	LPC(P-18:1)	(P-18:1)	(P-18:1)	505.353	5.735	C26 H52 N1 O6 P1	1	1	1	66.7	C	0.0195	0.021	0.0222	0.0146	0.0159	0.0166	0.0186	0.019	0.0192	0.0137	0.0137	0.0156	0.0162	0.0171	0.0149	0.0128	0.0144	0.0122	0.0159	0.0155	0.0167
LPC(P-18:0)	LPC	monoalkenyl	833	M+H	LPC(P-18:0)	(P-18:0)	(P-18:0)	507.369	6.558	C26 H54 N1 O6 P1	2	1	1	100	C	0.123	0.1368	0.1398	0.0956	0.1014	0.1084	0.1216	0.1228	0.1366	0.0912	0.0949	0.1041	0.1073	0.1079	0.1011	0.1276	0.1319	0.1222	0.1082	0.1047	0.1103
LPC(17:0)	LPC	monoacyl	387	M+H	LPC(17:0)	(17:0)	(17:0)	509.348	6.406	C25 H52 N1 O7 P1	3	1	1	100	A	0.046	0.0602	0.0527	0.0351	0.0339	0.0406	0.0431	0.0417	0.0543	0.034	0.0336	0.0371	0.0367	0.0347	0.0399	0.0535	0.0577	0.0453	0.039	0.044	0.0392
LPC(O-18:0)	LPC	monoalkyl	398	M+H	LPC(O-18:0)	(O-18:0)	(O-18:0)	509.385	7.761	C26 H56 N1 O6 P1	2	1	1	100	C	0.0453	0.049	0.0476	0.0316	0.0303	0.0317	0.0401	0.0442	0.0457	0.0324	0.0339	0.0373	0.037	0.0351	0.0349	0.057	0.0615	0.0516	0.0371	0.0362	0.0363
LPC(18:3)	LPC	monoacyl	849	M+H	LPC(18:3)	(18:3)	(18:3)	517.317	4.653	C26 H48 N1 O7 P1	1	1	2	100	C	0.0054	0.0058	0.0063	0.0043	0.0044	0.0052	0.0047	0.0054	0.0051	0.0038	0.0041	0.0042	0.004	0.0037	0.0034	0.0016	0.0019	0.0023	0.0046	0.0044	0.0046
LPC(18:2)	LPC	monoacyl	408	M+H	LPC(18:2)	(18:2)	(18:2)	519.332	5.108	C26 H50 N1 O7 P1	3	1	2	100	A	0.1596	0.1836	0.1891	0.1157	0.1216	0.1475	0.1384	0.1407	0.1501	0.0991	0.1035	0.1147	0.1129	0.1212	0.106	0.101	0.117	0.1067	0.1304	0.1223	0.1297
LPC(18:2)	LPC	monoacyl	409	M+H	LPC(18:2)	(18:2)	(18:2)	519.332	5.313	C26 H50 N1 O7 P1	3	1	2	100	A	0.1957	0.1976	0.2167	0.1504	0.1395	0.1576	0.1624	0.1853	0.1916	0.125	0.1322	0.1401	0.1439	0.1421	0.1404	0.1061	0.1385	0.1003	0.1544	0.1528	0.1496
LPC(18:1)	LPC	monoacyl	446	M+H	LPC(18:1)	(18:1)	(18:1)	521.348	5.795	C26 H52 N1 O7 P1	2	1	8	100	A	0.07	0.0734	0.0769	0.0498	0.0495	0.0601	0.0648	0.0662	0.0706	0.0482	0.05	0.0528	0.0507	0.0548	0.0522	0.0766	0.0723	0.0674	0.0552	0.0595	0.0592
LPC(18:1)	LPC	monoacyl	447	M+H	LPC(18:1)	(18:1)	(18:1)	521.348	6.015	C26 H52 N1 O7 P1	3	1	8	100	A	0.2738	0.3007	0.3056	0.2197	0.2195	0.2262	0.2722	0.2816	0.2944	0.2007	0.2097	0.2267	0.236	0.2331	0.2276	0.2392	0.2515	0.2218	0.2284	0.2325	0.2323
LPC(18:0)	LPC	monoacyl	283	M+H	LPC(18:0)	(18:0)	(18:0)	523.364	6.75	C26 H54 N1 O7 P1	3	1	2	100	A	0.0735	0.0803	0.0842	0.0611	0.057	0.0612	0.0686	0.0713	0.0795	0.054	0.0637	0.0572	0.0572	0.055	0.0556	0.0812	0.0958	0.0807	0.0604	0.0568	0.064
LPC(18:0)	LPC	monoacyl	285	M+H	LPC(18:0)	(18:0)	(18:0)	523.364	7.04	C26 H54 N1 O7 P1	4	1	2	100	A	2.1906	2.2816	2.272	1.4807	1.4515	1.5021	1.8903	2.1481	2.1006	1.6536	1.6433	1.8618	1.6621	1.5628	1.6419	2.4917	2.5824	2.2549	1.7702	1.6596	1.715
LPC(P-20:1)	LPC	monoalkenyl	861	M+H	LPC(P-20:1)	(P-20:1)	(P-20:1)	533.385	6.851	C28 H56 N1 O6 P1	1	1	0	100	C	0.0054	0.0054	0.0051	0.0036	0.0042	0.0044	0.0051	0.0051	0.0055	0.0038	0.0041	0.0043	0.0043	0.0046	0.004	0.0061	0.0062	0.0052	0.0048	0.0045	0.0046
LPC(19:0)	LPC	monoacyl	454	M+H	LPC(19:0)	(19:0)	(19:0)	537.379	7.751	C27 H56 N1 O7 P1	2	1	1	100	A	0.0295	0.0322	0.0305	0.021	0.0186	0.019	0.026	0.0284	0.0271	0.021	0.0211	0.0237	0.0233	0.0213	0.0217	0.0409	0.0439	0.0374	0.0233	0.0226	0.0237
LPC(O-20:0)	LPC	monoalkyl	869	M+H	LPC(O-20:0)	(O-20:0)	(O-20:0)	537.416	9.377	C28 H60 N1 O6 P1	1	1	1	100	C	0.0122	0.0118	0.0124	0.0073	0.0071	0.0076	0.0106	0.0109	0.0106	0.0074	0.0078	0.0084	0.0088	0.0081	0.0089	0.0186	0.0185	0.0153	0.0082	0.0081	0.009
LPC(20:5)	LPC	monoacyl	883	M+H	LPC(20:5)	(20:5)	(20:5)	541.317	4.402	C28 H48 N1 O7 P1	2	1	1	100	A	0.0038	0.0038	0.0043	0.0025	0.0028	0.0032	0.0036	0.0039	0.0042	0.0024	0.0026	0.0029	0.0029	0.0032	0.0029	0.0026	0.0029	0.0024	0.0032	0.0029	0.0034
LPC(20:4)	LPC	monoacyl	477	M+H	LPC(20:4)	(20:4)	(20:4)	543.332	5.07	C28 H50 N1 O7 P1	3	1	3	100	A	0.1744	0.1843	0.2081	0.1146	0.1254	0.1486	0.1453	0.1502	0.1508	0.1046	0.1046	0.1192	0.128	0.134	0.121	0.138	0.1635	0.125	0.1336	0.1288	0.1372
LPC(20:4)	LPC	monoacyl	480	M+H	LPC(20:4)	(20:4)	(20:4)	543.332	5.248	C28 H50 N1 O7 P1	2	1	3	100	A	0.0307	0.0353	0.0371	0.0232	0.0184	0.0178	0.0259	0.0272	0.0317	0.0175	0.0199	0.0195	0.0216	0.0204	0.0212	0.017	0.0253	0.0151	0.0245	0.0228	0.0248
LPC(20:3)	LPC	monoacyl	484	M+H	LPC(20:3)	(20:3)	(20:3)	545.348	5.472	C28 H52 N1 O7 P1	2	1	2	100	A	0.0128	0.0134	0.0144	0.0097	0.0096	0.0101	0.012	0.0113	0.0125	0.0083	0.008	0.0095	0.0089	0.0096	0.0093	0.0127	0.0127	0.0108	0.0109	0.0102	0.0101
LPC(20:3)	LPC	monoacyl	485	M+H	LPC(20:3)	(20:3)	(20:3)	545.348	5.657	C28 H52 N1 O7 P1	2	1	2	100	A	0.0111	0.0115	0.0128	0.008	0.0085	0.0096	0.0102	0.0099	0.0113	0.008	0.0075	0.0083	0.0089	0.0085	0.0058	0.0083	0.0107	0.0076	0.0103	0.0091	0.0103
LPC(20:2)	LPC	monoacyl	558	M+H	LPC(20:2)	(20:2)	(20:2)	547.364	6.057	C28 H54 N1 O7 P1	2	1	1	100	A	0.0058	0.0068	0.0065	0.0043	0.0049	0.0052	0.005	0.0059	0.0058	0.0039	0.0046	0.0049	0.005	0.005	0.0045	0.006	0.0068	0.0063	0.0051	0.0043	0.0055
LPC(20:2)	LPC	monoacyl	559	M+H	LPC(20:2)	(20:2)	(20:2)	547.364	6.294	C28 H54 N1 O7 P1	2	1	1	100	A	0.0411	0.0445	0.0456	0.0312	0.0331	0.0344	0.0435	0.0418	0.044	0.0328	0.0337	0.0377	0.0386	0.0355	0.034	0.0464	0.0504	0.0424	0.04	0.0385	0.0391
LPC(20:1)	LPC	monoacyl	673	M+H	LPC(20:1)	(20:1)	(20:1)	549.379	7.191	C28 H56 N1 O7 P1	3	1	3	100	A	0.0274	0.0312	0.0295	0.0242	0.0256	0.0259	0.0275	0.03	0.0299	0.0271	0.0276	0.0326	0.029	0.0325	0.0292	0.0417	0.0432	0.0326	0.0295	0.0286	0.0286
LPC(20:0)	LPC	monoacyl	681	M+H	LPC(20:0)	(20:0)	(20:0)	551.395	8.497	C28 H58 N1 O7 P1	2	1	1	100	A	0.017	0.017	0.019	0.0109	0.0108	0.0114	0.0151	0.0162	0.0166	0.0108	0.011	0.0126	0.0117	0.0122	0.0122	0.027	0.0289	0.0252	0.014	0.0133	0.0136
LPC(22:6)	LPC	monoacyl	695	M+H	LPC(22:6)	(22:6)	(22:6)	567.332	4.974	C30 H50 N1 O7 P1	2	1	1	100	A	0.0359	0.0359	0.0402	0.0251	0.0247	0.026	0.0296	0.0302	0.034	0.0234	0.0239	0.0262	0.0273	0.0278	0.026	0.0285	0.04	0.0251	0.0283	0.026	0.0275
LPC(22:6)	LPC	monoacyl	696	M+H	LPC(22:6)	(22:6)	(22:6)	567.332	5.137	C30 H50 N1 O7 P1	1	1	1	66.7	C	0.0168	0.0191	0.0164	0.0113	0.0097	0.0139	0.013	0.0176	0.0168	0.0113	0.0121	0.0125	0.0133	0.0138	0.0121	0.0108	0.0122	0.0098	0.0154	0.0144	0.015
LPC(22:5)	LPC	monoacyl	701	M+H	LPC(22:5)	(22:5)	(22:5)	569.348	5.268	C30 H52 N1 O7 P1	2	1	2	100	A	0.0087	0.009	0.0099	0.0061	0.0059	0.0067	0.0082	0.0079	0.008	0.0054	0.0064	0.0062	0.0061	0.0071	0.0058	0.0082	0.0103	0.0086	0.0069	0.0066	0.0067
LPC(22:4)	LPC	monoacyl	906	M+H	LPC(22:4)	(22:4)	(22:4)	571.364	5.826	C30 H54 N1 O7 P1	2	1	1	66.7	A	0.0057	0.0059	0.0064	0.0035	0.004	0.0054	0.0053	0.0055	0.0054	0.0039	0.004	0.0035	0.0039	0.0047	0.0039	0.008	0.0081	0.0067	0.0051	0.0052	0.0047
LPC(22:4)	LPC	monoacyl	907	M+H	LPC(22:4)	(22:4)	(22:4)	571.364	6.004	C30 H54 N1 O7 P1	2	1	1	100	A	0.0078	0.0079	0.0077	0.0063	0.0059	0.0059	0.0073	0.007	0.0075	0.0055	0.0059	0.0057	0.0062	0.0063	0.0059	0.0064	0.0093	0.0063	0.0064	0.0058	0.0066
LPC(22:1)	LPC	monoacyl	956	M+H	LPC(22:1)	(22:1)	(22:1)	577.411	8.559	C30 H60 N1 O7 P1	1	1	2	66.7	C	0.0054	0.0061	0.0058	0.0045	0.0047	0.005	0.0053	0.0058	0.0058	0.0043	0.0041	0.0049	0.005	0.0048	0.0051	0.0106	0.0102	0.0078	0.0052	0.0053	0.0057
LPC(22:0)	LPC	monoacyl	713	M+H	LPC(22:0)	(22:0)	(22:0)	579.426	10.18	C30 H62 N1 O7 P1	2	1	1	100	A	0.0133	0.014	0.0145	0.0085	0.0079	0.0083	0.011	0.0126	0.0134	0.0095	0.0095	0.01	0.0105	0.0097	0.0089	0.0249	0.027	0.0215	0.0105	0.0099	0.0108
LPC(24:4)	LPC	monoacyl	722	M+H	LPC(24:4)	(24:4)	(24:4)	599.395	6.979	C32 H58 N1 O7 P1	2	1	0	100	A	0.0055	0.0052	0.006	0.0039	0.0039	0.0039	0.0047	0.0052	0.0055	0.0035	0.004	0.0043	0.0042	0.0041	0.0041	0.0062	0.007	0.005	0.0043	0.0044	0.0051
LPC(24:1)	LPC	monoacyl	926	M+H	LPC(24:1)	(24:1)	(24:1)	605.442	10.16	C32 H64 N1 O7 P1	1	1	1	100	C	0.0049	0.0051	0.0053	0.0035	0.0033	0.0037	0.0043	0.005	0.0051	0.0035	0.0034	0.004	0.0042	0.0038	0.0037	0.0097	0.01	0.0081	0.0043	0.0043	0.0043
LPC(24:0)	LPC	monoacyl	745	M+H	LPC(24:0)	(24:0)	(24:0)	607.458	12.315	C32 H66 N1 O7 P1	2	1	1	100	A	0.0249	0.0263	0.0271	0.0158	0.0147	0.0171	0.0217	0.0241	0.024	0.0175	0.0181	0.0199	0.0185	0.0181	0.0182	0.0499	0.0518	0.0415	0.0205	0.0192	0.0203
LPC(30:1)	LPC	monoacyl	934	M+H	LPC(30:1)	(30:1)	(30:1)	689.536	14.804	C38 H76 N1 O7 P1	1	1	0	100	C	0.0122	0.0124	0.0144	0.0093	0.0094	0.0101	0.0115	0.0135	0.0128	0.0084	0.0088	0.0116	0.0103	0.011	0.0103	0.0278	0.0313	0.0218	0.0115	0.0099	0.0115
LPE(O-16:0)	LPE	monoalkyl	4	M-H	LPE(O-16:0)	(O-16:0)	(O-16:0)	439.306	6.475	C21 H46 N1 O6 P1	1	1	1	100	C	0.0221	0.0236	0.0241	0.0156	0.0159	0.0147	0.0226	0.0258	0.0227	0.0154	0.0155	0.0173	0.0163	0.016	0.0155	0.0184	0.0175	0.0172	0.0167	0.0175	0.0162
LPE(16:0)	LPE	monoacyl	25	M+H	LPE(16:0)	(16:0)	(16:0)	453.286	5.69	C21 H44 N1 O7 P1	2	1	2	66.7	A	0.0139	0.012	0.0152	0.0102	0.0112	0.009	0.0119	0.0127	0.0121	0.0092	0.0087	0.0098	0.0135	0.0135	0.0129	0.0331	0.0258	0.0344	0.0146	0.0148	0.015
LPE(16:0)	LPE	monoacyl	26	M+H	LPE(16:0)	(16:0)	(16:0)	453.286	5.92	C21 H44 N1 O7 P1	2	1	2	100	A	0.2273	0.2501	0.2455	0.166	0.1482	0.1544	0.2069	0.2213	0.2119	0.1561	0.1537	0.1807	0.163	0.1614	0.1866	0.1663	0.1758	0.1696	0.1743	0.1772	0.1608
LPE(O-18:3)	LPE	monoalkyl	28	M-H	LPE(O-18:3)	(O-18:3)	(O-18:3)	461.291	5.792	C23 H44 N1 O6 P1	1	1	0	100	C	0.0152	0.0177	0.0161	0.0137	0.0155	0.0138	0.0172	0.016	0.0163	0.0122	0.012	0.0116	0.0115	0.0119	0.0092	0.0111	0.0104	0.0083	0.0131	0.0155	0.0121
LPE(O-18:0)	LPE	monoalkyl	36	M+H	LPE(O-18:0)	(O-18:0)	(O-18:0)	467.338	7.902	C23 H50 N1 O6 P1	2	1	1	100	C	0.0382	0.0393	0.0412	0.0245	0.023	0.0217	0.0328	0.0389	0.0339	0.0259	0.0251	0.0293	0.0253	0.0243	0.0302	0.0367	0.0425	0.0388	0.0283	0.0291	0.0261
LPE(18:2)	LPE	monoacyl	39	M+H	LPE(18:2)	(18:2)	(18:2)	477.286	5.202	C23 H44 N1 O7 P1	2	1	2	100	A	0.0365	0.037	0.0355	0.0264	0.027	0.0261	0.0324	0.033	0.0325	0.024	0.0254	0.0294	0.0303	0.0399	0.0342	0.0724	0.0552	0.0627	0.0346	0.0388	0.033
LPE(18:2)	LPE	monoacyl	40	M+H	LPE(18:2)	(18:2)	(18:2)	477.286	5.397	C23 H44 N1 O7 P1	2	1	2	100	A	0.027	0.0315	0.0323	0.0234	0.0213	0.0235	0.03	0.0313	0.0291	0.0152	0.0197	0.0216	0.0236	0.0234	0.0244	0.0225	0.0225	0.0243	0.0194	0.0257	0.0248
LPE(18:1)	LPE	monoacyl	46	M+H	LPE(18:1)	(18:1)	(18:1)	479.301	6.146	C23 H46 N1 O7 P1	2	1	4	100	A	0.0888	0.0977	0.0982	0.0735	0.0751	0.08	0.1001	0.1021	0.1009	0.0695	0.0672	0.0793	0.0731	0.0815	0.0814	0.0809	0.0703	0.0877	0.0841	0.0847	0.0737
LPE(18:0)	LPE	monoacyl	52	M+H	LPE(18:0)	(18:0)	(18:0)	481.317	7.203	C23 H48 N1 O7 P1	2	1	2	100	A	0.5712	0.6242	0.6288	0.5031	0.4719	0.4714	0.5962	0.6652	0.617	1.0325	0.9	1.0744	0.9025	0.8296	1.0761	0.6907	0.7412	0.6171	0.7099	0.7324	0.6797
LPE(O-20:3)	LPE	monoalkyl	64	M-H	LPE(O-20:3)	(O-20:3)	(O-20:3)	489.322	6.898	C25 H48 N1 O6 P1	1	1	0	100	C	0.0066	0.0062	0.0063	0.0041	0.0051	0.0042	0.0071	0.0071	0.006	0.0042	0.0034	0.0038	0.0045	0.0037	0.0041	0.0041	0.0043	0.0063	0.005	0.005	0.0043
LPE(O-20:1)	LPE	monoalkyl	67	M-H	LPE(O-20:1)	(O-20:1)	(O-20:1)	493.353	9.374	C25 H52 N1 O6 P1	1	1	0	100	C	0.0144	0.0146	0.0165	0.0102	0.0091	0.0089	0.0144	0.0131	0.0125	0.0093	0.0095	0.0118	0.0103	0.0094	0.0121	0.0143	0.0127	0.0151	0.0129	0.0107	0.0081
LPE(O-20:0)	LPE	monoalkyl	68	M-H	LPE(O-20:0)	(O-20:0)	(O-20:0)	495.369	9.521	C25 H54 N1 O6 P1	1	1	1	100	C	0.0093	0.0091	0.0091	0.0039	0.0041	0.0044	0.0067	0.0087	0.005	0.0053	0.005	0.0053	0.005	0.0045	0.0062	0.0091	0.0097	0.0096	0.0059	0.0063	0.0051
LPE(20:5)	LPE	monoacyl	72	M+H	LPE(20:5)	(20:5)	(20:5)	499.27	4.477	C25 H42 N1 O7 P1	2	1	2	100	A	0.0068	0.007	0.0083	0.0055	0.0057	0.0059	0.0064	0.0084	0.0078	0.0056	0.0057	0.0074	0.0079	0.0111	0.0102	0.019	0.0175	0.0151	0.0102	0.0113	0.0088
LPE(20:4)	LPE	monoacyl	174	M+H	LPE(20:4)	(20:4)	(20:4)	501.286	5.17	C25 H44 N1 O7 P1	2	1	4	100	A	0.3111	0.3082	0.3103	0.2325	0.2397	0.2506	0.2533	0.2803	0.2661	0.2593	0.251	0.3091	0.3772	0.5392	0.4397	0.9002	0.8402	0.7505	0.432	0.4386	0.4048
LPE(20:2)	LPE	monoacyl	189	M-H	LPE(20:2)	(20:2)	(20:2)	505.317	6.414	C25 H48 N1 O7 P1	1	1	2	100	A	0.0078	0.0083	0.0097	0.0056	0.0069	0.0063	0.0074	0.0101	0.0074	0.0047	0.0052	0.0067	0.0059	0.0071	0.0066	0.0075	0.0088	0.0068	0.0066	0.0066	0.0069
LPE(22:6)	LPE	monoacyl	196	M+H	LPE(22:6)	(22:6)	(22:6)	525.286	5.062	C27 H44 N1 O7 P1	2	1	2	100	A	0.231	0.2431	0.243	0.1896	0.2214	0.2124	0.1997	0.2116	0.1881	0.1882	0.181	0.2263	0.2755	0.3795	0.3051	0.5755	0.6072	0.3966	0.3119	0.3127	0.2663
LPE(22:5)	LPE	monoacyl	208	M+H	LPE(22:5)	(22:5)	(22:5)	527.301	5.361	C27 H46 N1 O7 P1	2	1	4	100	A	0.0637	0.0587	0.0686	0.0466	0.0452	0.0435	0.0513	0.0487	0.0493	0.0402	0.0432	0.0548	0.065	0.0944	0.0788	0.1756	0.1673	0.1276	0.0828	0.0753	0.0762
LPE(22:5)	LPE	monoacyl	209	M-H	LPE(22:5)	(22:5)	(22:5)	527.301	5.645	C27 H46 N1 O7 P1	1	1	4	100	C	0.0076	0.0059	0.0061	0.0047	0.0087	0.0056	0.0098	0.0087	0.0041	0.0074	0.0049	0.0054	0.0055	0.0079	0.0094	0.0125	0.014	0.0096	0.0081	0.0089	0.007
LPE(22:4)	LPE	monoacyl	212	M-H	LPE(22:4)	(22:4)	(22:4)	529.317	5.954	C27 H48 N1 O7 P1	1	1	2	100	C	0.049	0.047	0.0489	0.0347	0.0407	0.0374	0.0422	0.0424	0.0401	0.0369	0.0333	0.044	0.0491	0.0688	0.0611	0.1418	0.1284	0.1143	0.0592	0.0609	0.0585
MG(P-12:1)	MG	monoalkenyl	1509	M+NH4	MG(P-12:1)	(P-12:1)	(P-12:1)	256.204	3.835	C15 H28 O3	1	1	0	66.7	C	0.0056	0.0065	0.0063	0.0128	0.0114	0.0127	0.0048	0.0052	0.0046	0.0102	0.0108	0.0059	0.021	0.0233	0.0222	0.0018	0.0015	0.0021	0.0105	0.0094	0.01
MG(P-15:2)	MG	monoalkenyl	1533	M+H	MG(P-15:2)	(P-15:2)	(P-15:2)	296.235	4.395	C18 H32 O3	1	1	0	66.7	C	0.006	0.0059	0.0074	0.0153	0.0128	0.0141	0.0189	0.0169	0.013	0.0087	0.009	0.0084	0.0214	0.0233	0.0222	0.0032	0.004	0.0031	0.01	0.0111	0.0113
MG(15:2)	MG	monoacyl	1584	M+NH4	MG(15:2)	(15:2)	(15:2)	312.23	3.589	C18 H32 O4	2	1	0	66.7	A	0.0111	0.0124	0.0144	0.0206	0.0175	0.0221	0.0124	0.0132	0.0156	0.0133	0.0118	0.0136	0.0327	0.0263	0.0289	0.0098	0.0126	0.011	0.0231	0.0227	0.0236
MG(15:2)	MG	monoacyl	1587	M+NH4	MG(15:2)	(15:2)	(15:2)	312.23	4.101	C18 H32 O4	2	1	0	100	C	0.0101	0.0125	0.0118	0.0148	0.0119	0.0148	0.0141	0.0127	0.0125	0.0092	0.0062	0.0077	0.0182	0.0179	0.0153	0.0121	0.0109	0.0151	0.0131	0.0129	0.0109
MG(O-17:1)	MG	monoalkyl	2237	M+NH4	MG(O-17:1)	(O-17:1)	(O-17:1)	328.298	9.369	C20 H40 O3	2	1	0	66.7	A	1e-07	0.001	1e-07	0.008	0.0099	0.0092	0.0015	0.0029	0.0009	0.0472	0.0375	0.0397	0.0464	0.0298	0.0352	0.0054	0.0059	0.004	0.013	0.0123	0.014
MG(17:3)	MG	monoacyl	2052	M+NH4	MG(17:3)	(17:3)	(17:3)	338.246	4.279	C20 H34 O4	1	1	0	100	B	0.0007	0.0002	0.0008	0.0002	0.0002	0.0001	0.0227	0.0185	0.0198	0.001	0.0012	0.001	0.0014	0.0004	0.0009	0.0323	0.0137	0.0503	0.0052	0.0047	0.0061
MG(O-18:1)	MG	monoalkyl	2159	M+NH4	MG(O-18:1)	(O-18:1)	(O-18:1)	342.313	9.89	C21 H42 O3	1	1	0	100	C	0.0021	0.0018	0.0029	0.0463	0.0416	0.0453	0.0056	0.0029	0.003	0.0362	0.0384	0.0377	0.0389	0.0311	0.0305	0.082	0.0816	0.0841	0.038	0.0374	0.0361
MG(P-19:4)	MG	monoalkenyl	2172	M+NH4	MG(P-19:4)	(P-19:4)	(P-19:4)	348.266	5.304	C22 H36 O3	1	1	0	100	C	0.1601	0.2013	0.2385	0.2758	0.2035	0.2864	0.5099	0.513	0.5169	0.2089	0.2411	0.2639	0.2757	0.3214	0.3205	0.3546	0.4676	0.4115	0.1738	0.2382	0.2071
MG(P-19:4)	MG	monoalkenyl	2173	M+NH4	MG(P-19:4)	(P-19:4)	(P-19:4)	348.266	5.898	C22 H36 O3	1	1	0	100	C	0.0244	0.0283	0.0274	0.0214	0.0196	0.0254	0.0192	0.0252	0.0229	0.0218	0.0237	0.0256	0.0294	0.0277	0.0277	0.0239	0.0248	0.0211	0.0249	0.0251	0.029
MG(18:2)	MG	monoacyl	2041	M+NH4	MG(18:2)	(18:2)	(18:2)	354.277	6.63	C21 H38 O4	2	1	1	100	A	0.039	0.0488	0.0473	0.0265	0.0252	0.0394	0.0366	0.026	0.0304	0.0214	0.0219	0.0278	0.0286	0.0283	0.0264	0.0419	0.0472	0.037	0.0313	0.0341	0.0332
MG(18:1)	MG	monoacyl	2058	M+NH4	MG(18:1)	(18:1)	(18:1)	356.293	7.549	C21 H40 O4	2	1	3	100	A	0.024	0.0305	0.0291	0.0243	0.0201	0.0291	0.0247	0.0211	0.0229	0.0167	0.0185	0.0221	0.0241	0.0239	0.0236	0.0229	0.0251	0.0241	0.022	0.0193	0.0227
MG(18:1)	MG	monoacyl	2059	M+NH4	MG(18:1)	(18:1)	(18:1)	356.293	7.75	C21 H40 O4	1	1	3	100	B	0.0162	0.0193	0.0171	0.0151	0.0157	0.0172	0.0176	0.0181	0.0177	0.0107	0.0102	0.0142	0.0174	0.0137	0.0165	0.0153	0.0152	0.0145	0.0136	0.0157	0.0148
MG(O-19:1)	MG	monoalkyl	2193	M+NH4	MG(O-19:1)	(O-19:1)	(O-19:1)	356.329	11.342	C22 H44 O3	2	1	0	100	C	0.0011	0.0016	0.0015	0.0085	0.0093	0.0108	0.0029	0.0024	0.003	0.0455	0.0385	0.0407	0.046	0.0318	0.0286	0.0065	0.0084	0.0059	0.0128	0.0138	0.0152
MG(20:4)	MG	monoacyl	2212	M+NH4	MG(20:4)	(20:4)	(20:4)	378.277	6.501	C23 H38 O4	1	1	1	100	B	0.0158	0.0183	0.0166	0.0114	0.0104	0.0172	0.0167	0.0113	0.0143	0.0093	0.0093	0.0107	0.0109	0.0116	0.0112	0.0166	0.0198	0.0157	0.0136	0.0157	0.0144
PC(14:0_14:0)	PC	diacyl	935	M+H	PC(28:0)	(14:0_14:0)	(28:0)	677.5	12.261	C36 H72 N1 O8 P1	2	2	13	100	A	0.0091	0.0102	0.0094	0.0078	0.0074	0.0079	0.0076	0.0088	0.0085	0.0069	0.0066	0.0074	0.0077	0.0077	0.008	0.0075	0.0082	0.0073	0.0075	0.008	0.0084
PC(14:0_15:0)	PC	diacyl	3119	M+H	PC(29:0)	(14:0_15:0)	(29:0)	691.515	13.336	C37 H74 N1 O8 P1	2	2	11	100	A	0.0097	0.0102	0.0108	0.0071	0.0075	0.0068	0.0081	0.0087	0.0082	0.0063	0.0069	0.0072	0.008	0.008	0.008	0.0074	0.0083	0.0074	0.0076	0.0079	0.0084
PC(30:1)	PC	diacyl	1180	M+H	PC(30:1)	(30:1)	(30:1)	703.515	13.102	C38 H74 N1 O8 P1	2	3	10	100	A	0.0089	0.0085	0.0115	0.0084	0.0086	0.0093	0.0084	0.0078	0.0065	0.0064	0.0062	0.0069	0.0074	0.0071	0.0087	0.0077	0.007	0.0068	0.0064	0.008	0.0074
PC(14:0_16:0)	PC	diacyl	1192	M+H	PC(30:0)	(14:0_16:0)	(30:0)	705.531	14.507	C38 H76 N1 O8 P1	3	2	12	100	A	1.413	1.373	1.4034	1.0613	0.9582	0.9349	1.1827	1.2646	1.2375	1.061	1.0239	1.0721	1.1101	1.0726	1.218	1.2499	1.2322	1.2032	1.0893	1.1617	1.1211
PC(O-31:0)	PC	alkyl-acyl	3122	M+H	PC(O-31:0)	(O-31:0)	(O-31:0)	705.567	17.52	C39 H80 N1 O7 P1	1	1	0	100	C	0.083	0.0854	0.0784	0.0591	0.0542	0.055	0.0697	0.0761	0.0743	0.063	0.0572	0.066	0.0672	0.063	0.0666	0.0641	0.0723	0.0652	0.0591	0.0664	0.0629
PC(31:2)	PC	diacyl	3124	M+H	PC(31:2)	(31:2)	(31:2)	715.515	13.299	C39 H74 N1 O8 P1	1	1	8	100	C	0.0063	0.0066	0.0064	0.005	0.006	0.0055	0.0055	0.006	0.0055	0.0044	0.0044	0.0048	0.0056	0.0052	0.0055	0.004	0.0046	0.0037	0.005	0.0056	0.0058
PC(O-14:0_18:2)	PC	alkyl-acyl	3128	M+H	PC(O-32:2)	(O-14:0_18:2)	(O-32:2)	715.552	16.128	C40 H78 N1 O7 P1	1	2	0	100	C	0.0049	0.0052	0.0046	0.0047	0.0051	0.0044	0.0058	0.005	0.0042	0.0044	0.0051	0.0039	0.0062	0.0045	0.0031	0.0025	0.0052	0.0045	0.0033	0.0051	0.0051
PC(15:0_16:1)	PC	diacyl	1201	M+H	PC(31:1)	(15:0_16:1)	(31:1)	717.531	13.666	C39 H76 N1 O8 P1	2	2	13	100	A	0.0157	0.0165	0.0158	0.0144	0.0152	0.0135	0.014	0.0159	0.0155	0.0116	0.0104	0.0121	0.0157	0.0136	0.0152	0.0133	0.0136	0.013	0.0124	0.0152	0.0141
PC(31:1)	PC	diacyl	1203	M+H	PC(31:1)	(31:1)	(31:1)	717.531	14.287	C39 H76 N1 O8 P1	1	2	13	100	C	0.0053	0.0046	0.0042	0.0042	0.0044	0.0037	0.004	0.0042	0.0047	0.0045	0.0036	0.0043	0.004	0.005	0.0044	0.0034	0.004	0.0042	0.0041	0.0051	0.0046
PC(O-16:0_16:1)	PC	alkyl-acyl	1212	M+H	PC(O-32:1)	(O-16:0_16:1)	(O-32:1)	717.567	16.595	C40 H80 N1 O7 P1	3	3	0	100	A	0.4982	0.4985	0.5173	0.4172	0.4327	0.4173	0.4377	0.4826	0.4576	0.3528	0.3544	0.3739	0.439	0.4161	0.4457	0.41	0.4035	0.4093	0.4079	0.4428	0.4461
PC(O-32:1)	PC	alkyl-acyl	1213	M+H	PC(O-32:1)	(O-32:1)	(O-32:1)	717.567	17.353	C40 H80 N1 O7 P1	1	3	0	100	C	0.0568	0.0538	0.0582	0.049	0.0503	0.0479	0.0499	0.0471	0.053	0.0452	0.0412	0.0467	0.0513	0.0528	0.0495	0.0447	0.0551	0.0511	0.042	0.0502	0.0506
PC(O-16:1_16:0)	PC	alkyl-acyl	1214	M+H	PC(O-32:1)	(O-16:1_16:0)	(O-32:1)	717.567	18.572	C40 H80 N1 O7 P1	2	3	0	100	A	0.3284	0.344	0.3548	0.2287	0.2224	0.2259	0.2468	0.3078	0.2451	0.2236	0.227	0.2639	0.2272	0.2386	0.2706	0.2293	0.2851	0.2681	0.2363	0.2288	0.2466
PC(P-11:0_22:6)	PC	alkenyl-acyl	3130	M+H	PC(P-33:6)	(P-11:0_22:6)	(P-33:6)	719.489	13.976	C41 H70 N1 O7 P1	1	1	0	100	B	0.005	0.0053	0.0054	0.0042	0.0044	0.0043	0.0047	0.0049	0.005	0.0041	0.0038	0.0039	0.0049	0.0043	0.0046	0.0035	0.0038	0.003	0.004	0.0037	0.0047
PC(31:0)	PC	diacyl	1237	M+H	PC(31:0)	(31:0)	(31:0)	719.547	15.327	C39 H78 N1 O8 P1	1	3	13	100	C	0.0217	0.0202	0.0226	0.0175	0.0176	0.0175	0.0236	0.0211	0.0198	0.0173	0.0164	0.0179	0.0189	0.0175	0.0202	0.0215	0.0214	0.0233	0.0173	0.019	0.0183
PC(15:0_16:0)	PC	diacyl	1238	M+H	PC(31:0)	(15:0_16:0)	(31:0)	719.547	15.777	C39 H78 N1 O8 P1	2	3	13	100	A	0.6554	0.6487	0.6867	0.4678	0.4267	0.4044	0.5426	0.5835	0.5435	0.4883	0.4629	0.5229	0.5286	0.4897	0.5253	0.5566	0.5746	0.5349	0.5059	0.5007	0.5235
PC(O-16:0_16:0)	PC	alkyl-acyl	1252	M+H	PC(O-32:0)	(O-16:0_16:0)	(O-32:0)	719.583	18.952	C40 H82 N1 O7 P1	3	2	0	100	A	3.2381	3.2881	3.2659	2.0766	1.8387	1.8334	2.483	3.0276	2.5531	2.3182	2.2092	2.2836	2.359	2.2243	2.5957	2.6454	2.7342	2.4975	2.2502	2.4223	2.3673
PC(P-13:1_20:4)	PC	alkenyl-acyl	3132	M+H	PC(P-33:5)	(P-13:1_20:4)	(P-33:5)	721.505	16.078	C41 H72 N1 O7 P1	1	1	0	100	B	0.0064	0.0064	0.0067	0.0044	0.003	0.0055	0.0048	0.0074	0.005	0.0035	0.005	0.0044	0.0035	0.0067	0.0044	0.0032	0.0039	0.0024	0.0051	0.0047	0.0061
PC(32:3)	PC	diacyl	3135	M+H	PC(32:3)	(32:3)	(32:3)	727.515	12.73	C40 H74 N1 O8 P1	1	1	10	100	C	0.013	0.0127	0.0116	0.0109	0.0108	0.0107	0.01	0.0123	0.0115	0.0092	0.0092	0.0102	0.0122	0.0115	0.012	0.0102	0.01	0.0087	0.0111	0.0116	0.0127
PC(14:0_18:2)	PC	diacyl	1747	M+H	PC(32:2)	(14:0_18:2)	(32:2)	729.531	13.082	C40 H76 N1 O8 P1	3	4	13	100	A	0.2348	0.2221	0.2415	0.1928	0.2034	0.2054	0.1984	0.2192	0.202	0.1674	0.1653	0.1791	0.2032	0.2093	0.2154	0.1851	0.1861	0.172	0.1893	0.2094	0.2098
PC(32:2)	PC	diacyl	1751	M+H	PC(32:2)	(32:2)	(32:2)	729.531	14.267	C40 H76 N1 O8 P1	2	4	13	100	A	0.0154	0.0173	0.0259	0.0196	0.0144	0.0194	0.0153	0.0175	0.0162	0.0136	0.0171	0.0168	0.021	0.0181	0.0182	0.017	0.0172	0.012	0.017	0.0161	0.0194
PC(15:2_17:0)	PC	diacyl	1753	M+H	PC(32:2)	(15:2_17:0)	(32:2)	729.531	17.534	C40 H76 N1 O8 P1	1	4	13	66.7	C	0.009	0.0088	0.009	0.0077	0.0073	0.0086	0.007	0.0081	0.0084	0.0074	0.0073	0.0072	0.0079	0.0073	0.009	0.0069	0.0078	0.0068	0.0077	0.0082	0.007
PC(16:0_16:1)	PC	diacyl	1824	M+H	PC(32:1)	(16:0_16:1)	(32:1)	731.547	14.878	C40 H78 N1 O8 P1	4	2	16	100	A	3.0598	3.1459	3.2243	2.7198	2.7631	2.8839	2.6131	2.8519	2.8872	2.1944	2.2579	2.4241	2.7379	2.7528	2.8838	2.5944	2.7873	2.6588	2.6312	2.7271	2.7451
PC(O-17:1_16:0)	PC	alkyl-acyl	1850	M+H	PC(O-33:1)	(O-17:1_16:0)	(O-33:1)	731.583	17.723	C41 H82 N1 O7 P1	2	2	0	100	A	0.0347	0.0391	0.0392	0.0317	0.0353	0.034	0.0338	0.0364	0.0382	0.0255	0.0281	0.0289	0.0331	0.0346	0.0336	0.0259	0.0341	0.0335	0.0323	0.03	0.0352
PC(O-12:1_22:6)	PC	alkyl-acyl	3137	M+H	PC(O-34:7)	(O-12:1_22:6)	(O-34:7)	733.505	15.218	C42 H72 N1 O7 P1	1	1	0	100	C	0.0073	0.006	0.0063	0.0058	0.005	0.0059	0.0064	0.007	0.0067	0.0048	0.006	0.0056	0.0055	0.0043	0.005	0.0048	0.005	0.0046	0.0053	0.006	0.0057
PC(16:0_16:0)	PC	diacyl	890	M+H	PC(32:0)	(16:0_16:0)	(32:0)	733.562	17.033	C40 H80 N1 O8 P1	4	2	14	100	A	18.3702	18.0425	17.8129	13.9523	12.6669	13.0723	15.8572	16.823	15.9426	15.4525	14.4576	14.8725	15.0922	14.5391	15.2813	16.9672	16.9597	15.6998	14.8601	14.9397	13.6769
PC(O-33:0)	PC	alkyl-acyl	3142	M+H	PC(O-33:0)	(O-33:0)	(O-33:0)	733.599	19.963	C41 H84 N1 O7 P1	2	2	0	100	B	0.0454	0.0487	0.0437	0.0302	0.0271	0.0292	0.0383	0.0406	0.0364	0.0342	0.0329	0.0354	0.0349	0.0338	0.0365	0.04	0.0418	0.04	0.0342	0.0356	0.0338
PC(33:5)	PC	diacyl	3145	M+H	PC(33:5)	(33:5)	(33:5)	737.5	16.195	C41 H72 N1 O8 P1	1	1	4	100	C	0.006	0.0069	0.0049	0.0048	0.0057	0.0059	0.0054	0.0051	0.0059	0.0055	0.0053	0.0054	0.0047	0.005	0.0055	0.0071	0.006	0.006	0.0059	0.0052	0.0042
PC(O-34:5)	PC	alkyl-acyl	3147	M+H	PC(O-34:5)	(O-34:5)	(O-34:5)	737.536	12.977	C42 H76 N1 O7 P1	1	1	0	100	C	0.0089	0.009	0.0083	0.0074	0.0087	0.008	0.0072	0.009	0.0067	0.0051	0.0062	0.0056	0.0079	0.0076	0.0078	0.0055	0.0069	0.0053	0.0079	0.0067	0.0064
PC(33:4)	PC	diacyl	3149	M+H	PC(33:4)	(33:4)	(33:4)	739.515	14.576	C41 H74 N1 O8 P1	1	2	8	100	C	0.0382	0.0301	0.0372	0.0281	0.0295	0.0322	0.0325	0.0375	0.0334	0.0294	0.0308	0.0306	0.0337	0.0345	0.0323	0.0314	0.0337	0.027	0.0325	0.0314	0.0328
PC(O-14:0_20:4)	PC	alkyl-acyl	1854	M+H	PC(O-34:4)	(O-14:0_20:4)	(O-34:4)	739.552	14.261	C42 H78 N1 O7 P1	2	2	0	100	A	0.039	0.0365	0.0423	0.0337	0.0368	0.0376	0.0359	0.0386	0.0353	0.0285	0.0286	0.0321	0.0349	0.0373	0.0361	0.0286	0.0312	0.0272	0.0321	0.031	0.0366
PC(33:3)	PC	diacyl	3151	M+H	PC(33:3)	(33:3)	(33:3)	741.531	16.924	C41 H76 N1 O8 P1	1	1	10	100	C	0.0273	0.0276	0.0287	0.0245	0.0233	0.0227	0.0217	0.0249	0.0211	0.0176	0.0209	0.0203	0.0198	0.0219	0.0254	0.0226	0.022	0.0235	0.0201	0.0292	0.0202
PC(O-34:3)	PC	alkyl-acyl	1862	M+H	PC(O-34:3)	(O-34:3)	(O-34:3)	741.567	14.83	C42 H80 N1 O7 P1	1	3	0	100	C	0.0242	0.0242	0.0249	0.022	0.0224	0.0224	0.0212	0.0229	0.0233	0.0171	0.019	0.0203	0.022	0.0227	0.0232	0.0188	0.0203	0.018	0.0206	0.022	0.0244
PC(O-18:3_16:0)	PC	alkyl-acyl	1865	M+H	PC(O-34:3)	(O-18:3_16:0)	(O-34:3)	741.567	15.796	C42 H80 N1 O7 P1	1	3	0	100	C	0.0119	0.0155	0.0169	0.0095	0.0113	0.0117	0.0112	0.0139	0.0091	0.011	0.0102	0.0113	0.011	0.0117	0.0123	0.0102	0.012	0.0091	0.0111	0.0115	0.0117
PC(O-16:1_18:2)	PC	alkyl-acyl	1867	M+H	PC(O-34:3)	(O-16:1_18:2)	(O-34:3)	741.567	16.773	C42 H80 N1 O7 P1	2	3	0	100	A	0.0407	0.0421	0.0415	0.0349	0.0355	0.0353	0.0373	0.0379	0.0386	0.029	0.0283	0.0302	0.035	0.0331	0.0349	0.0282	0.0287	0.0268	0.0316	0.0357	0.0345
PC(15:0_18:2)	PC	diacyl	1878	M+H	PC(33:2)	(15:0_18:2)	(33:2)	743.547	14.265	C41 H78 N1 O8 P1	2	5	12	100	A	0.1055	0.1019	0.1184	0.0985	0.0968	0.1053	0.0969	0.1023	0.1016	0.0784	0.0796	0.0884	0.1013	0.1007	0.0983	0.088	0.0878	0.0841	0.0968	0.0879	0.101
PC(15:1_18:1)	PC	diacyl	1880	M+H	PC(33:2)	(15:1_18:1)	(33:2)	743.547	18.475	C41 H78 N1 O8 P1	1	5	12	100	C	0.0841	0.0887	0.0838	0.0707	0.0661	0.0758	0.0719	0.0866	0.0733	0.0621	0.0658	0.0885	0.075	0.0714	0.0757	0.073	0.0762	0.0712	0.0672	0.0744	0.0727
PC(O-18:2_16:0)	PC	alkyl-acyl	1899	M+H	PC(O-34:2)	(O-18:2_16:0)	(O-34:2)	743.583	16.966	C42 H82 N1 O7 P1	2	4	0	100	A	0.9831	0.9803	1.012	0.9401	0.9518	0.9561	0.9023	0.9387	0.9274	0.7937	0.7739	0.7994	0.9391	0.8978	0.9435	0.8835	0.8776	0.7824	0.8696	0.9223	0.8731
PC(O-16:0_18:2)	PC	alkyl-acyl	1903	M+H	PC(O-34:2)	(O-16:0_18:2)	(O-34:2)	743.583	18.852	C42 H82 N1 O7 P1	2	4	0	100	B	0.0303	0.0378	0.0387	0.0375	0.0367	0.038	0.0388	0.0373	0.046	0.0407	0.029	0.0292	0.0352	0.0286	0.0373	0.0394	0.0327	0.025	0.0292	0.0319	0.0327
PC(P-15:2_20:5)	PC	alkenyl-acyl	3154	M+H	PC(P-35:7)	(P-15:2_20:5)	(P-35:7)	745.505	13.883	C43 H72 N1 O7 P1	1	2	0	100	C	0.0054	0.0055	0.0047	0.0047	0.0046	0.0045	0.0043	0.0044	0.0049	0.0041	0.0035	0.0036	0.0048	0.0043	0.0044	0.0038	0.0042	0.003	0.0038	0.0045	0.0047
PC(O-35:8)	PC	alkyl-acyl	3157	M+H	PC(O-35:8)	(O-35:8)	(O-35:8)	745.505	17.158	C43 H72 N1 O7 P1	1	1	0	100	C	0.0082	0.0082	0.0082	0.0086	0.0068	0.0087	0.007	0.0074	0.0074	0.0076	0.0074	0.0077	0.0084	0.008	0.009	0.0076	0.0077	0.0074	0.0066	0.0073	0.0059
PC(33:0)	PC	diacyl	2164	M+H	PC(33:0)	(33:0)	(33:0)	747.578	17.698	C41 H82 N1 O8 P1	1	2	13	100	C	0.0122	0.0139	0.0118	0.0114	0.011	0.011	0.0088	0.0107	0.0158	0.0079	0.0107	0.0082	0.0088	0.0106	0.0131	0.0103	0.0114	0.0108	0.0094	0.0139	0.0142
PC(33:0)	PC	diacyl	2165	M+H	PC(33:0)	(33:0)	(33:0)	747.578	18.064	C41 H82 N1 O8 P1	1	2	13	100	C	0.0551	0.0596	0.0647	0.0511	0.0431	0.0474	0.0512	0.0526	0.0464	0.0388	0.0378	0.0504	0.0472	0.0478	0.0486	0.049	0.0541	0.0501	0.0459	0.0481	0.0456
PC(16:0_17:0)	PC	diacyl	2166	M+H	PC(33:0)	(16:0_17:0)	(33:0)	747.578	18.567	C41 H82 N1 O8 P1	2	2	13	100	A	0.4227	0.4335	0.4512	0.2676	0.2597	0.28	0.3006	0.3783	0.2902	0.2684	0.2829	0.3391	0.2705	0.2889	0.3315	0.2953	0.362	0.3543	0.2857	0.2906	0.2957
PC(O-18:0_16:0)	PC	alkyl-acyl	2172	M+H	PC(O-34:0)	(O-18:0_16:0)	(O-34:0)	747.614	20.591	C42 H86 N1 O7 P1	3	3	0	100	A	0.5378	0.5319	0.5349	0.3173	0.2748	0.2739	0.3657	0.4433	0.4034	0.352	0.3558	0.3839	0.3541	0.3468	0.389	0.415	0.4421	0.3826	0.3639	0.3513	0.3802
PC(O-35:6)	PC	alkyl-acyl	3168	M+H	PC(O-35:6)	(O-35:6)	(O-35:6)	749.536	15.794	C43 H76 N1 O7 P1	2	4	0	66.7	B	0.0077	0.0081	0.0092	0.0066	0.0068	0.0065	0.0061	0.007	0.0072	0.0063	0.0058	0.0064	0.0071	0.0064	0.007	0.0067	0.0064	0.0058	0.0073	0.0075	0.0062
PC(34:5)	PC	diacyl	3171	M+H	PC(34:5)	(34:5)	(34:5)	751.515	11.474	C42 H74 N1 O8 P1	1	1	6	100	C	0.004	0.0044	0.0043	0.0042	0.004	0.0048	0.004	0.0038	0.0041	0.0037	0.0027	0.0042	0.0044	0.0032	0.0042	0.0033	0.0033	0.003	0.0037	0.0041	0.004
PC(34:4)	PC	diacyl	2321	M+H	PC(34:4)	(34:4)	(34:4)	753.531	12.024	C42 H76 N1 O8 P1	1	2	22	100	C	0.0078	0.0071	0.008	0.0066	0.0061	0.007	0.0059	0.0068	0.0067	0.0053	0.0049	0.0055	0.0069	0.0075	0.0074	0.0064	0.0068	0.0058	0.0061	0.0066	0.0077
PC(14:0_20:4)	PC	diacyl	2323	M+H	PC(34:4)	(14:0_20:4)	(34:4)	753.531	12.807	C42 H76 N1 O8 P1	3	2	22	100	A	0.0971	0.0984	0.1005	0.0865	0.0855	0.0824	0.0863	0.0926	0.0848	0.072	0.0698	0.0774	0.0903	0.085	0.0868	0.0737	0.0798	0.0671	0.0825	0.0854	0.0896
PC(14:0_20:4)	PC	diacyl	2325	M+H	PC(34:4)	(14:0_20:4)	(34:4)	753.531	17.193	C42 H76 N1 O8 P1	1	2	22	100	C	0.0401	0.0395	0.0392	0.035	0.0344	0.0332	0.0359	0.0378	0.0354	0.0312	0.0305	0.0338	0.0342	0.0317	0.0329	0.0314	0.0346	0.0277	0.0333	0.0329	0.0338
PC(O-14:1_21:3)	PC	alkyl-acyl	3173	M+H	PC(O-35:4)	(O-14:1_21:3)	(O-35:4)	753.567	15.435	C43 H80 N1 O7 P1	2	2	0	100	A	0.0213	0.0218	0.021	0.0205	0.0178	0.02	0.0181	0.0199	0.0193	0.0164	0.0175	0.018	0.017	0.0177	0.0171	0.0141	0.0192	0.0156	0.0165	0.0167	0.0157
PC(16:1_18:2)	PC	diacyl	2355	M+H	PC(34:3)	(16:1_18:2)	(34:3)	755.547	13.409	C42 H78 N1 O8 P1	3	3	14	100	A	0.4042	0.4428	0.4402	0.3718	0.3998	0.3731	0.3873	0.4126	0.4041	0.3165	0.3163	0.3516	0.393	0.3842	0.3961	0.3333	0.3562	0.321	0.3783	0.3926	0.378
PC(16:0_18:3)	PC	diacyl	2358	M+H	PC(34:3)	(16:0_18:3)	(34:3)	755.547	13.871	C42 H78 N1 O8 P1	3	3	14	100	A	0.1627	0.1605	0.1858	0.1508	0.1636	0.1583	0.1541	0.1634	0.1625	0.1262	0.1401	0.1294	0.1548	0.1515	0.1549	0.135	0.1332	0.1264	0.1526	0.1802	0.162
PC(16:0_18:3)	PC	diacyl	2360	M+H	PC(34:3)	(16:0_18:3)	(34:3)	755.547	14.255	C42 H78 N1 O8 P1	3	3	14	100	A	0.1654	0.1507	0.1801	0.1509	0.1383	0.1498	0.1389	0.1498	0.1534	0.1086	0.0983	0.0964	0.1346	0.1357	0.1372	0.1103	0.122	0.1207	0.1074	0.1241	0.1319
PC(34:3)	PC	diacyl	2364	M+H	PC(34:3)	(34:3)	(34:3)	755.547	17.612	C42 H78 N1 O8 P1	1	3	14	66.7	C	0.0114	0.0101	0.01	0.0077	0.0077	0.0094	0.0076	0.0091	0.0107	0.014	0.0098	0.0122	0.0075	0.0117	0.0088	0.0128	0.0131	0.0135	0.0077	0.0102	0.0088
PC(16:0_18:2)	PC	diacyl	2442	M+H	PC(34:2)	(16:0_18:2)	(34:2)	757.562	15.442	C42 H80 N1 O8 P1	3	5	30	100	A	12.628	12.6749	12.9749	11.1841	11.3268	10.8664	11.0067	11.8043	11.4738	9.6941	10.1605	10.4483	11.3463	11.1953	11.4746	11.0029	11.5381	11.0741	10.3838	11.0411	11.1578
PC(16:0_18:1)	PC	diacyl	1156	M+H	PC(34:1)	(16:0_18:1)	(34:1)	759.578	17.531	C42 H82 N1 O8 P1	3	2	22	100	A	14.3256	14.7425	14.4103	12.902	12.9727	13.1712	13.3118	13.719	13.7277	11.7377	11.2867	11.829	13.0095	12.7115	13.1011	12.754	13.3437	12.583	12.3839	12.8789	12.4143
PC(O-14:1_22:6)	PC	alkyl-acyl	3175	M+H	PC(O-36:7)	(O-14:1_22:6)	(O-36:7)	761.536	17.836	C44 H76 N1 O7 P1	1	1	0	66.7	C	0.0234	0.0253	0.0253	0.022	0.0221	0.0249	0.0211	0.0287	0.0237	0.0162	0.0203	0.0192	0.0218	0.0239	0.0204	0.0206	0.02	0.0181	0.0177	0.0203	0.02
PC(16:0_18:0)	PC	diacyl	2484	M+H	PC(34:0)	(16:0_18:0)	(34:0)	761.593	19.683	C42 H84 N1 O8 P1	2	2	13	100	A	3.4387	3.4606	3.3734	2.2667	2.0247	2.0091	2.6952	3.0351	2.8918	2.602	2.4278	2.6841	2.5702	2.4171	2.6655	2.9689	3.1302	2.835	2.448	2.5681	2.5361
PC(O-36:6)	PC	alkyl-acyl	3176	M+H	PC(O-36:6)	(O-36:6)	(O-36:6)	763.552	13.659	C44 H78 N1 O7 P1	1	2	0	100	C	0.0098	0.0108	0.0112	0.0081	0.0096	0.0103	0.0089	0.01	0.0098	0.0078	0.0078	0.0083	0.0094	0.0091	0.0092	0.0075	0.0083	0.0078	0.0091	0.0096	0.01
PC(P-18:4_18:1)	PC	alkenyl-acyl	3178	M+H	PC(P-36:5)	(P-18:4_18:1)	(P-36:5)	763.552	14.709	C44 H78 N1 O7 P1	1	1	0	100	C	0.0129	0.0141	0.0133	0.0113	0.0123	0.0121	0.0115	0.0125	0.0128	0.0096	0.01	0.0109	0.0117	0.0111	0.0118	0.009	0.0105	0.0082	0.0115	0.0115	0.0128
PC(O-14:1_22:5)	PC	alkyl-acyl	3177	M+H	PC(O-36:6)	(O-14:1_22:5)	(O-36:6)	763.552	18.743	C44 H78 N1 O7 P1	1	2	0	100	B	0.0147	0.0153	0.0158	0.0137	0.0139	0.0142	0.0142	0.015	0.0144	0.012	0.0111	0.0109	0.0128	0.0139	0.013	0.0106	0.0121	0.0107	0.013	0.0123	0.0128
PC(O-16:1_20:4)	PC	alkyl-acyl	2507	M+H	PC(O-36:5)	(O-16:1_20:4)	(O-36:5)	765.567	14.482	C44 H80 N1 O7 P1	2	7	0	100	A	0.076	0.0713	0.0723	0.0679	0.0658	0.0655	0.0653	0.0686	0.0685	0.0567	0.056	0.0593	0.066	0.0635	0.0714	0.0555	0.0602	0.0518	0.0662	0.0661	0.0649
PC(O-16:0_20:5)	PC	alkyl-acyl	2509	M+H	PC(O-36:5)	(O-16:0_20:5)	(O-36:5)	765.567	15.11	C44 H80 N1 O7 P1	2	7	0	100	A	0.0563	0.0537	0.0529	0.0492	0.0429	0.05	0.0493	0.0487	0.0527	0.0425	0.0342	0.0405	0.05	0.0487	0.0616	0.0377	0.0447	0.0398	0.0424	0.0384	0.0371
PC(O-16:1_20:4)	PC	alkyl-acyl	2511	M+H	PC(O-36:5)	(O-16:1_20:4)	(O-36:5)	765.567	16.351	C44 H80 N1 O7 P1	3	7	0	100	A	0.5533	0.5628	0.5672	0.4577	0.478	0.4398	0.4651	0.5245	0.5012	0.3849	0.392	0.3936	0.4794	0.4371	0.4583	0.381	0.3942	0.3563	0.4161	0.4672	0.4695
PC(15:0_20:4)	PC	diacyl	2522	M+H	PC(35:4)	(15:0_20:4)	(35:4)	767.547	13.926	C43 H78 N1 O8 P1	2	4	15	100	A	0.067	0.0747	0.0773	0.0646	0.0648	0.0679	0.0619	0.0719	0.0683	0.0576	0.0563	0.0583	0.0676	0.0624	0.069	0.0547	0.0579	0.0492	0.0619	0.0644	0.0647
PC(35:4)	PC	diacyl	2524	M+H	PC(35:4)	(35:4)	(35:4)	767.547	16.924	C43 H78 N1 O8 P1	1	4	15	100	C	0.0173	0.0173	0.0197	0.0172	0.0194	0.0177	0.0184	0.0172	0.0175	0.0146	0.0151	0.0148	0.0149	0.0151	0.0154	0.012	0.0143	0.0116	0.0166	0.0196	0.0152
PC(O-36:4)	PC	alkyl-acyl	2549	M+H	PC(O-36:4)	(O-36:4)	(O-36:4)	767.583	15.357	C44 H82 N1 O7 P1	2	7	0	100	B	0.0707	0.0566	0.0596	0.0547	0.0586	0.0537	0.0538	0.0535	0.0548	0.0546	0.0525	0.051	0.055	0.0481	0.064	0.0547	0.0618	0.0504	0.0514	0.0588	0.0578
PC(O-16:0_20:4)	PC	alkyl-acyl	2551	M+H	PC(O-36:4)	(O-16:0_20:4)	(O-36:4)	767.583	16.823	C44 H82 N1 O7 P1	2	7	0	100	A	2.4907	2.5195	2.6592	2.3117	2.3137	2.1575	2.363	2.3516	2.3532	1.8483	1.8671	1.9299	2.2207	2.1654	2.2485	1.8773	1.9906	1.7735	2.0379	2.2423	2.2352
PC(P-37:9)	PC	alkenyl-acyl	3181	M+H	PC(P-37:9)	(P-37:9)	(P-37:9)	769.505	14.874	C45 H72 N1 O7 P1	1	1	0	100	C	0.0073	0.007	0.0079	0.0077	0.0083	0.0089	0.0069	0.0074	0.0078	0.0037	0.0036	0.0048	0.0042	0.0044	0.005	0.0049	0.0053	0.0052	0.0057	0.0057	0.006
PC(17:1_18:2)	PC	diacyl	3183	M+H	PC(35:3)	(17:1_18:2)	(35:3)	769.562	14.53	C43 H80 N1 O8 P1	2	3	12	100	A	0.0358	0.0363	0.0378	0.0326	0.0328	0.0349	0.0285	0.0329	0.0335	0.0278	0.0282	0.0282	0.0285	0.0328	0.0357	0.0322	0.03	0.028	0.0314	0.0329	0.0291
PC(O-18:1_18:2)	PC	alkyl-acyl	2567	M+H	PC(O-36:3)	(O-18:1_18:2)	(O-36:3)	769.599	17.357	C44 H84 N1 O7 P1	2	5	0	100	A	0.4303	0.4293	0.4289	0.3907	0.3911	0.4062	0.382	0.3977	0.398	0.3371	0.3238	0.3446	0.3899	0.3873	0.3961	0.342	0.3838	0.3421	0.3639	0.3777	0.3665
PC(O-16:0_20:3)	PC	alkyl-acyl	2570	M+H	PC(O-36:3)	(O-16:0_20:3)	(O-36:3)	769.599	17.983	C44 H84 N1 O7 P1	2	5	0	100	A	0.0444	0.0406	0.046	0.06	0.0544	0.0495	0.0456	0.0417	0.056	0.0386	0.0349	0.0419	0.0473	0.0558	0.0555	0.0461	0.0427	0.041	0.0448	0.0521	0.0451
PC(17:0_18:2)	PC	diacyl	2597	M+H	PC(35:2)	(17:0_18:2)	(35:2)	771.578	16.829	C43 H82 N1 O8 P1	2	3	14	100	A	0.242	0.2564	0.2499	0.215	0.2218	0.2078	0.2175	0.2279	0.2133	0.1749	0.1725	0.1805	0.2111	0.1949	0.2176	0.1952	0.1904	0.1818	0.1915	0.2139	0.2041
PC(O-18:0_18:2)	PC	alkyl-acyl	2630	M+H	PC(O-36:2)	(O-18:0_18:2)	(O-36:2)	771.614	19.775	C44 H86 N1 O7 P1	2	2	0	100	A	0.193	0.196	0.1961	0.1787	0.1743	0.1766	0.1738	0.1792	0.1884	0.1562	0.1432	0.1533	0.1852	0.1649	0.1652	0.1744	0.1794	0.1569	0.1654	0.1848	0.1735
PC(O-15:2_22:6)	PC	alkyl-acyl	3188	M+H	PC(O-37:8)	(O-15:2_22:6)	(O-37:8)	773.536	15.192	C45 H76 N1 O7 P1	1	2	0	66.7	C	0.004	0.0037	0.0047	0.0051	0.0042	0.0047	0.0042	0.0039	0.0058	0.0044	0.004	0.0035	0.0047	0.0041	0.0036	0.0045	0.0053	0.0032	0.0046	0.0042	0.0048
PC(O-15:2_22:6)	PC	alkyl-acyl	3190	M+H	PC(O-37:8)	(O-15:2_22:6)	(O-37:8)	773.536	16.817	C45 H76 N1 O7 P1	1	2	0	100	B	0.4012	0.4145	0.4278	0.3519	0.3587	0.3583	0.3751	0.372	0.3733	0.2979	0.2804	0.3105	0.3583	0.3411	0.3556	0.2791	0.3072	0.2573	0.3123	0.3357	0.3391
PC(O-37:8)	PC	alkyl-acyl	3192	M+H	PC(O-37:8)	(O-37:8)	(O-37:8)	773.536	19.139	C45 H76 N1 O7 P1	1	2	0	100	C	0.0102	0.0091	0.0067	0.0088	0.0082	0.0091	0.0052	0.0088	0.0077	0.0087	0.0067	0.0068	0.0073	0.0083	0.009	0.0086	0.0081	0.0086	0.0088	0.0078	0.0092
PC(O-37:8)	PC	alkyl-acyl	3193	M+H	PC(O-37:8)	(O-37:8)	(O-37:8)	773.536	19.704	C45 H76 N1 O7 P1	1	2	0	100	C	0.0146	0.013	0.0139	0.0133	0.0141	0.0145	0.0134	0.0131	0.014	0.0132	0.0119	0.0117	0.013	0.0143	0.0124	0.0131	0.0119	0.0123	0.0126	0.0116	0.0105
PC(17:0_18:1)	PC	diacyl	2653	M+H	PC(35:1)	(17:0_18:1)	(35:1)	773.593	18.849	C43 H84 N1 O8 P1	2	2	16	100	A	0.2816	0.292	0.3099	0.2475	0.2511	0.261	0.2521	0.2683	0.2506	0.2058	0.204	0.2254	0.2453	0.2437	0.2656	0.2361	0.2534	0.2433	0.2294	0.2407	0.2545
PC(O-18:0_18:1)	PC	alkyl-acyl	2658	M+H	PC(O-36:1)	(O-18:0_18:1)	(O-36:1)	773.63	20.649	C44 H88 N1 O7 P1	2	3	0	100	A	0.1326	0.1312	0.1395	0.1066	0.1071	0.1049	0.1071	0.1144	0.1162	0.0901	0.0901	0.102	0.1064	0.1009	0.1118	0.1088	0.1128	0.0998	0.1094	0.1022	0.1125
PC(16:0_19:0)	PC	diacyl	2684	M+H	PC(35:0)	(16:0_19:0)	(35:0)	775.609	20.391	C43 H86 N1 O8 P1	2	2	13	100	A	0.0474	0.0435	0.0445	0.0283	0.0217	0.0228	0.0327	0.04	0.034	0.0301	0.031	0.033	0.0288	0.0299	0.0335	0.0322	0.0358	0.0367	0.0289	0.0314	0.0299
PC(O-20:0_16:0)	PC	alkyl-acyl	2687	M+H	PC(O-36:0)	(O-20:0_16:0)	(O-36:0)	775.645	21.464	C44 H90 N1 O7 P1	2	2	0	100	A	0.0987	0.0991	0.0964	0.054	0.049	0.0503	0.0668	0.0831	0.068	0.0675	0.0634	0.0712	0.0616	0.0633	0.0696	0.0752	0.0824	0.0785	0.0647	0.0691	0.0663
PC(16:1_20:5)	PC	diacyl	2692	M+H	PC(36:6)	(16:1_20:5)	(36:6)	777.531	11.783	C44 H76 N1 O8 P1	2	4	17	100	A	0.0094	0.0099	0.0097	0.0092	0.0079	0.0095	0.0081	0.0086	0.0091	0.0089	0.0083	0.0088	0.0103	0.0083	0.0085	0.0067	0.0079	0.0055	0.0086	0.0076	0.0095
PC(14:0_22:6)	PC	diacyl	2693	M+H	PC(36:6)	(14:0_22:6)	(36:6)	777.531	12.342	C44 H76 N1 O8 P1	2	4	17	100	A	0.0169	0.0187	0.0188	0.0164	0.0152	0.0178	0.0154	0.0183	0.0165	0.0143	0.0133	0.0149	0.0174	0.0162	0.0156	0.0131	0.015	0.0124	0.0155	0.0151	0.0161
PC(O-37:6)	PC	alkyl-acyl	3199	M+H	PC(O-37:6)	(O-37:6)	(O-37:6)	777.567	14.886	C45 H80 N1 O7 P1	1	2	0	66.7	C	0.0089	0.0093	0.0099	0.0075	0.0094	0.0092	0.0078	0.0092	0.009	0.0065	0.0069	0.0076	0.0084	0.0086	0.0086	0.0067	0.0069	0.0058	0.0076	0.0056	0.009
PC(O-15:1_22:5)	PC	alkyl-acyl	3200	M+H	PC(O-37:6)	(O-15:1_22:5)	(O-37:6)	777.567	20.189	C45 H80 N1 O7 P1	1	2	0	100	B	0.0368	0.0274	0.0285	0.0227	0.0246	0.0231	0.0203	0.0236	0.0288	0.0144	0.019	0.0168	0.022	0.0207	0.024	0.0161	0.0213	0.0179	0.0204	0.019	0.0243
PC(18:2_18:3)	PC	diacyl	2703	M+H	PC(36:5)	(18:2_18:3)	(36:5)	779.547	12.49	C44 H78 N1 O8 P1	3	5	21	100	A	0.0387	0.0442	0.0419	0.0361	0.035	0.0379	0.0354	0.0416	0.0362	0.0296	0.0285	0.0286	0.0345	0.0344	0.034	0.0283	0.0299	0.0252	0.0333	0.036	0.0363
PC(16:1_20:4)	PC	diacyl	2705	M+H	PC(36:5)	(16:1_20:4)	(36:5)	779.547	13.11	C44 H78 N1 O8 P1	3	5	21	100	A	0.3026	0.3117	0.3124	0.247	0.2553	0.2643	0.2616	0.2844	0.2617	0.2162	0.2192	0.2307	0.263	0.2566	0.2672	0.2254	0.2203	0.1744	0.2354	0.2955	0.2616
PC(16:0_20:5)	PC	diacyl	2707	M+H	PC(36:5)	(16:0_20:5)	(36:5)	779.547	13.64	C44 H78 N1 O8 P1	4	5	21	100	A	0.4569	0.4461	0.4468	0.3583	0.3929	0.4365	0.3806	0.4384	0.4334	0.3244	0.3426	0.3573	0.4106	0.3982	0.3994	0.3098	0.3573	0.2812	0.3703	0.3983	0.4122
PC(O-37:5)	PC	alkyl-acyl	2718	M+H	PC(O-37:5)	(O-37:5)	(O-37:5)	779.583	15.721	C45 H82 N1 O7 P1	2	4	0	100	B	0.0344	0.0299	0.0367	0.0295	0.0293	0.0305	0.0294	0.0283	0.0314	0.0301	0.0265	0.0276	0.0382	0.032	0.0301	0.0261	0.0278	0.0248	0.0281	0.0292	0.0323
PC(18:2_18:2)	PC	diacyl	1355	M+H	PC(36:4)	(18:2_18:2)	(36:4)	781.562	13.897	C44 H80 N1 O8 P1	3	4	26	100	A	1.2501	1.2559	1.3532	1.1398	1.1385	1.1137	1.1433	1.1714	1.181	0.8961	0.9404	0.9773	1.2177	1.126	1.1851	0.9647	1.0059	0.8978	1.0965	1.0679	1.164
PC(16:0_20:4)	PC	diacyl	1357	M+H	PC(36:4)	(16:0_20:4)	(36:4)	781.562	15.082	C44 H80 N1 O8 P1	4	4	26	100	A	12.7179	13.0086	13.4187	11.188	11.3367	11.7938	11.1333	11.5589	11.7444	9.7848	9.448	9.9938	11.8806	11.2202	11.9303	10.1888	11.1702	9.7169	10.6381	10.958	10.7643
PC(O-37:4)	PC	alkyl-acyl	2726	M+H	PC(O-37:4)	(O-37:4)	(O-37:4)	781.599	18.158	C45 H84 N1 O7 P1	2	2	0	100	B	0.043	0.0463	0.0443	0.0398	0.0421	0.0418	0.0383	0.0411	0.0364	0.03	0.0339	0.0356	0.0399	0.0389	0.0395	0.033	0.0358	0.0295	0.0352	0.0379	0.0385
PC(O-38:10)	PC	alkyl-acyl	3286	M+H	PC(O-38:10)	(O-38:10)	(O-38:10)	783.52	11.529	C46 H74 N1 O7 P1	1	1	0	66.7	C	1e-07	0.0001	0.0001	0.0002	0.0004	0.0005	0.0001	0.0001	0.0001	0.0062	0.004	0.0034	0.0006	1e-07	0.0001	1e-07	0.0004	1e-07	0.0015	0.0012	0.0017
PC(18:1_18:2)	PC	diacyl	2730	M+H	PC(36:3)	(18:1_18:2)	(36:3)	783.578	15.774	C44 H82 N1 O8 P1	4	5	20	100	A	3.396	3.4149	3.7243	3.0315	3.1157	2.9868	3.0009	3.1942	3.0554	2.5648	2.658	2.8623	3.1681	2.9875	3.1407	2.8989	3.0039	2.8121	2.9592	2.9682	3.1603
PC(16:0_20:3)	PC	diacyl	2731	M+H	PC(36:3)	(16:0_20:3)	(36:3)	783.578	16.218	C44 H82 N1 O8 P1	2	5	20	100	A	1.1657	1.2325	1.252	0.9971	0.9926	0.961	1.0485	1.0656	1.0438	0.8284	0.8968	0.9805	1.0964	1.0557	1.0876	0.9498	1.0603	0.721	0.9912	0.9993	1.0327
PC(16:0_20:2)	PC	diacyl	1610	M+H	PC(36:2)	(16:0_20:2)	(36:2)	785.593	17.779	C44 H84 N1 O8 P1	2	3	40	100	A	1.5021	1.5528	1.567	1.3621	1.377	1.3657	1.348	1.4897	1.5002	1.0965	1.3018	1.1573	1.3277	1.3537	1.3654	1.2289	1.3217	1.2669	1.2847	1.3921	1.398
PC(18:0_18:2)	PC	diacyl	1611	M+H	PC(36:2)	(18:0_18:2)	(36:2)	785.593	18.197	C44 H84 N1 O8 P1	4	3	40	100	A	7.447	7.5139	7.6384	6.1962	6.7997	6.4205	6.0053	7.112	6.4447	4.6249	5.5675	5.8686	6.3294	6.9134	6.8044	5.761	6.544	5.9634	5.9001	6.508	6.1206
PC(18:0_18:1)	PC	diacyl	2739	M+H	PC(36:1)	(18:0_18:1)	(36:1)	787.609	19.865	C44 H86 N1 O8 P1	2	2	26	100	A	3.1672	3.3805	3.2459	2.6721	2.7109	2.9216	2.7633	2.9272	2.9622	2.5489	2.4201	2.5704	2.7586	2.6609	2.8019	2.7165	2.8469	2.6412	2.7565	2.8093	2.7176
PC(37:7)	PC	diacyl	3206	M+H	PC(37:7)	(37:7)	(37:7)	789.531	13.915	C45 H76 N1 O8 P1	1	3	4	66.7	C	0.0022	0.0028	0.0031	0.0019	0.0031	0.0019	0.0025	0.0024	0.0021	0.0023	0.0024	0.0024	0.0027	0.0025	0.0022	0.002	0.0023	0.0016	0.0022	0.0031	0.0028
PC(15:2_22:5)	PC	diacyl	3207	M+H	PC(37:7)	(15:2_22:5)	(37:7)	789.531	14.467	C45 H76 N1 O8 P1	1	3	4	100	C	0.0125	0.0132	0.0131	0.0125	0.0108	0.0123	0.0116	0.0131	0.0124	0.012	0.0102	0.0111	0.0118	0.0113	0.013	0.0101	0.0114	0.009	0.0109	0.0116	0.0107
PC(37:7)	PC	diacyl	3208	M+H	PC(37:7)	(37:7)	(37:7)	789.531	14.898	C45 H76 N1 O8 P1	1	3	4	100	C	0.0072	0.0072	0.0077	0.0062	0.0053	0.0072	0.0049	0.0057	0.0067	0.0038	0.0055	0.0067	0.005	0.0066	0.0053	0.0054	0.0057	0.0053	0.0057	0.0067	0.0062
PC(O-38:7)	PC	alkyl-acyl	2743	M+H	PC(O-38:7)	(O-38:7)	(O-38:7)	789.567	13.483	C46 H80 N1 O7 P1	2	5	0	100	B	0.0358	0.0359	0.0368	0.0299	0.0321	0.0316	0.0311	0.034	0.0341	0.0275	0.027	0.0287	0.032	0.0317	0.0328	0.0235	0.0282	0.0205	0.0302	0.0322	0.0318
PC(O-38:7)	PC	alkyl-acyl	2744	M+H	PC(O-38:7)	(O-38:7)	(O-38:7)	789.567	13.922	C46 H80 N1 O7 P1	2	5	0	100	B	0.0136	0.0195	0.0157	0.0143	0.0132	0.015	0.0125	0.0176	0.0115	0.0104	0.0126	0.0125	0.0112	0.0134	0.0151	0.0098	0.0108	0.0097	0.0118	0.0133	0.0136
PC(O-18:4_20:3)	PC	alkyl-acyl	2745	M+H	PC(O-38:7)	(O-18:4_20:3)	(O-38:7)	789.567	14.709	C46 H80 N1 O7 P1	1	5	0	100	C	0.0207	0.0225	0.0222	0.0161	0.0199	0.0202	0.0198	0.0219	0.0188	0.0158	0.0157	0.0166	0.0195	0.018	0.0197	0.015	0.0179	0.0133	0.0175	0.0139	0.0191
PC(O-16:1_22:6)	PC	alkyl-acyl	2746	M+H	PC(O-38:7)	(O-16:1_22:6)	(O-38:7)	789.567	15.722	C46 H80 N1 O7 P1	2	5	0	100	A	0.1259	0.1331	0.1408	0.1108	0.1113	0.1128	0.1052	0.1231	0.1099	0.1004	0.1008	0.1023	0.1108	0.1087	0.1161	0.0889	0.0999	0.0863	0.1083	0.1089	0.1074
PC(O-16:1_22:6)	PC	alkyl-acyl	2747	M+H	PC(O-38:7)	(O-16:1_22:6)	(O-38:7)	789.567	20.039	C46 H80 N1 O7 P1	1	5	0	66.7	C	0.004	0.0042	0.0047	0.004	0.0036	0.0036	0.0039	0.0036	0.0037	0.0036	0.003	0.0033	0.0036	0.0038	0.0042	0.0032	0.0029	0.0029	0.0033	0.0045	0.0038
PC(18:0_18:0)	PC	diacyl	2748	M+H	PC(36:0)	(18:0_18:0)	(36:0)	789.625	20.806	C44 H88 N1 O8 P1	2	2	12	100	A	0.1531	0.1502	0.1513	0.085	0.0805	0.0809	0.0983	0.1159	0.1067	0.1031	0.1033	0.1137	0.1012	0.1043	0.1085	0.1223	0.1303	0.1183	0.0988	0.1018	0.105
PC(15:0_22:6)	PC	diacyl	2759	M+H	PC(37:6)	(15:0_22:6)	(37:6)	791.547	13.442	C45 H78 N1 O8 P1	2	3	6	66.7	A	0.0152	0.018	0.0183	0.013	0.015	0.0134	0.0155	0.0146	0.0165	0.0122	0.011	0.0129	0.0167	0.0159	0.016	0.0131	0.0139	0.0091	0.0151	0.013	0.0161
PC(37:6)	PC	diacyl	2761	M+H	PC(37:6)	(37:6)	(37:6)	791.547	16.069	C45 H78 N1 O8 P1	1	3	6	66.7	C	0.0129	0.012	0.0142	0.0117	0.0111	0.0117	0.0131	0.0111	0.0117	0.0122	0.0105	0.0107	0.0113	0.0125	0.0108	0.0103	0.0117	0.011	0.0107	0.0122	0.0124
PC(37:6)	PC	diacyl	2762	M+H	PC(37:6)	(37:6)	(37:6)	791.547	16.344	C45 H78 N1 O8 P1	1	3	6	66.7	C	0.0281	0.0289	0.0273	0.0282	0.0294	0.0262	0.0269	0.0311	0.0291	0.0223	0.0211	0.0242	0.0256	0.0283	0.0261	0.0263	0.0278	0.02	0.0251	0.0271	0.0235
PC(O-18:2_20:4)	PC	alkyl-acyl	2767	M+H	PC(O-38:6)	(O-18:2_20:4)	(O-38:6)	791.583	15.012	C46 H82 N1 O7 P1	3	9	0	100	A	0.2713	0.2994	0.3114	0.269	0.271	0.2846	0.2343	0.235	0.2607	0.1943	0.2102	0.2095	0.256	0.2551	0.2496	0.2062	0.2293	0.203	0.2321	0.2424	0.2369
PC(O-18:1_20:5)	PC	alkyl-acyl	2769	M+H	PC(O-38:6)	(O-18:1_20:5)	(O-38:6)	791.583	15.327	C46 H82 N1 O7 P1	2	9	0	100	A	0.1103	0.1184	0.1053	0.0915	0.1056	0.1102	0.1529	0.1201	0.1038	0.1071	0.1198	0.0954	0.1515	0.1012	0.1113	0.1205	0.111	0.108	0.0934	0.1022	0.0972
PC(O-16:0_22:6)	PC	alkyl-acyl	2772	M+H	PC(O-38:6)	(O-16:0_22:6)	(O-38:6)	791.583	16.185	C46 H82 N1 O7 P1	3	9	0	100	A	0.7976	0.8055	0.8548	0.6772	0.6728	0.6497	0.6899	0.7361	0.7131	0.5518	0.5838	0.6268	0.7073	0.6782	0.6963	0.5604	0.6235	0.517	0.652	0.6688	0.7043
PC(17:1_20:4)	PC	diacyl	2776	M+H	PC(37:5)	(17:1_20:4)	(37:5)	793.562	14.264	C45 H80 N1 O8 P1	2	3	10	100	A	0.0451	0.0413	0.0468	0.0397	0.0393	0.0419	0.04	0.0432	0.0407	0.0332	0.0315	0.0343	0.0376	0.0409	0.0402	0.0327	0.0343	0.0297	0.0376	0.0341	0.0423
PC(37:5)	PC	diacyl	2777	M+H	PC(37:5)	(37:5)	(37:5)	793.562	18.064	C45 H80 N1 O8 P1	2	3	10	100	C	0.0633	0.0712	0.078	0.0646	0.0554	0.103	0.0631	0.0591	0.0631	0.0497	0.0506	0.0561	0.065	0.0643	0.0669	0.0529	0.057	0.0475	0.0597	0.0631	0.0548
PC(O-18:1_20:4)	PC	alkyl-acyl	2796	M+H	PC(O-38:5)	(O-18:1_20:4)	(O-38:5)	793.599	16.951	C46 H84 N1 O7 P1	2	6	0	100	A	2.5278	2.5362	2.6107	2.4396	2.5516	2.5779	2.2873	2.4839	2.3567	2.0729	2.0174	2.0502	2.4572	2.4151	2.3812	2.0637	2.1479	1.8037	2.2299	2.3815	2.2015
PC(P-39:10)	PC	alkenyl-acyl	3211	M+H	PC(P-39:10)	(P-39:10)	(P-39:10)	795.52	15.506	C47 H74 N1 O7 P1	1	1	0	100	C	0.0102	0.0115	0.0111	0.0091	0.012	0.0153	0.0102	0.0132	0.0088	0.0067	0.0074	0.0081	0.0046	0.0062	0.0074	0.0069	0.0098	0.0102	0.0079	0.0077	0.0081
PC(P-39:10)	PC	alkenyl-acyl	3212	M+H	PC(P-39:10)	(P-39:10)	(P-39:10)	795.52	16.705	C47 H74 N1 O7 P1	1	1	0	100	C	0.0107	0.0105	0.0118	0.0112	0.0114	0.013	0.0098	0.0106	0.0095	0.0118	0.0131	0.0108	0.0117	0.0123	0.0103	0.0127	0.0125	0.0121	0.0117	0.0111	0.0103
PC(17:0_20:4)	PC	diacyl	2819	M+H	PC(37:4)	(17:0_20:4)	(37:4)	795.578	16.487	C45 H82 N1 O8 P1	2	4	14	100	A	0.386	0.361	0.371	0.3049	0.3238	0.3204	0.3248	0.3505	0.3492	0.2604	0.2666	0.2718	0.3291	0.3068	0.3221	0.2716	0.297	0.24	0.2958	0.3257	0.3229
PC(O-18:1_20:3)	PC	alkyl-acyl	2825	M+H	PC(O-38:4)	(O-18:1_20:3)	(O-38:4)	795.614	18.125	C46 H86 N1 O7 P1	2	7	0	100	A	0.0625	0.0572	0.0546	0.054	0.0618	0.0549	0.0632	0.0558	0.0696	0.037	0.0437	0.0426	0.0547	0.065	0.0555	0.0398	0.0588	0.0346	0.0555	0.0504	0.0503
PC(O-16:0_22:4)	PC	alkyl-acyl	2827	M+H	PC(O-38:4)	(O-16:0_22:4)	(O-38:4)	795.614	18.842	C46 H86 N1 O7 P1	3	7	0	100	A	0.3174	0.3353	0.3759	0.3041	0.3221	0.3206	0.3057	0.3337	0.323	0.2539	0.2453	0.2704	0.3196	0.2961	0.3347	0.2643	0.2843	0.2417	0.2779	0.3038	0.3169
PC(O-18:0_20:4)	PC	alkyl-acyl	2831	M+H	PC(O-38:4)	(O-18:0_20:4)	(O-38:4)	795.614	19.539	C46 H86 N1 O7 P1	2	7	0	100	A	1.0003	0.9774	1.0203	0.8185	0.8924	0.8957	0.8621	0.9276	0.8846	0.6988	0.6743	0.7337	0.8238	0.8084	0.8818	0.7442	0.8146	0.6732	0.8256	0.8232	0.8573
PC(O-39:10)	PC	alkyl-acyl	3215	M+H	PC(O-39:10)	(O-39:10)	(O-39:10)	797.536	19.247	C47 H76 N1 O7 P1	1	1	0	100	C	0.0215	0.0192	0.0195	0.0185	0.0175	0.0188	0.0171	0.0188	0.017	0.0167	0.0149	0.017	0.0155	0.0162	0.0142	0.0181	0.0172	0.0185	0.0171	0.0168	0.0136
PC(37:3)	PC	diacyl	3216	M+H	PC(37:3)	(37:3)	(37:3)	797.593	14.816	C45 H84 N1 O8 P1	1	3	14	66.7	C	0.0019	0.0024	0.0027	0.002	0.0019	0.0022	0.002	0.0024	0.0019	0.0016	0.0019	0.0018	0.0021	0.0018	0.0024	0.0019	0.0018	0.0013	0.0023	0.0021	0.0022
PC(37:3)	PC	diacyl	3218	M+H	PC(37:3)	(37:3)	(37:3)	797.593	17.575	C45 H84 N1 O8 P1	2	3	14	100	A	0.0206	0.0228	0.0206	0.0203	0.0213	0.0222	0.0209	0.0209	0.0215	0.0168	0.0172	0.0183	0.0213	0.0174	0.0201	0.016	0.0202	0.0163	0.0175	0.0215	0.0189
PC(O-17:3_22:6)	PC	alkyl-acyl	3219	M+H	PC(O-39:9)	(O-17:3_22:6)	(O-39:9)	799.552	17.237	C47 H78 N1 O7 P1	1	2	0	66.7	B	0.0271	0.0291	0.0315	0.0271	0.0263	0.0261	0.0268	0.0282	0.0284	0.0235	0.0228	0.0245	0.0256	0.0262	0.0248	0.022	0.0227	0.0188	0.0243	0.0253	0.0251
PC(O-39:9)	PC	alkyl-acyl	3220	M+H	PC(O-39:9)	(O-39:9)	(O-39:9)	799.552	19.581	C47 H78 N1 O7 P1	1	2	0	66.7	C	0.0035	0.0032	0.0036	0.0036	0.0033	0.0035	0.0038	0.0036	0.0034	0.0036	0.0037	0.0034	0.0025	0.0036	0.0032	0.0029	0.003	0.0034	0.0034	0.0042	0.0029
PC(O-39:9)	PC	alkyl-acyl	3221	M+H	PC(O-39:9)	(O-39:9)	(O-39:9)	799.552	19.793	C47 H78 N1 O7 P1	1	2	0	100	C	0.0064	0.0071	0.007	0.0055	0.006	0.0074	0.0066	0.0066	0.0067	0.0055	0.0057	0.0054	0.0057	0.0062	0.0062	0.0058	0.0065	0.006	0.0051	0.0057	0.0048
PC(19:0_18:2)	PC	diacyl	2853	M+H	PC(37:2)	(19:0_18:2)	(37:2)	799.609	19.519	C45 H86 N1 O8 P1	2	2	14	100	A	0.0815	0.081	0.0844	0.0703	0.0862	0.0742	0.0739	0.0808	0.0723	0.0565	0.0612	0.0727	0.0646	0.0676	0.0662	0.0669	0.087	0.0721	0.0819	0.0821	0.0696
PC(O-38:2)	PC	alkyl-acyl	2854	M+H	PC(O-38:2)	(O-38:2)	(O-38:2)	799.645	20.744	C46 H90 N1 O7 P1	1	2	0	100	C	0.069	0.0687	0.0744	0.0595	0.0637	0.0646	0.056	0.063	0.0598	0.0534	0.053	0.0587	0.0608	0.0572	0.0637	0.0584	0.0633	0.0571	0.0592	0.0584	0.0597
PC(O-17:2_22:6)	PC	alkyl-acyl	2856	M+H	PC(O-39:8)	(O-17:2_22:6)	(O-39:8)	801.567	19.308	C47 H80 N1 O7 P1	1	4	0	100	B	0.0079	0.0083	0.0094	0.0079	0.0069	0.0081	0.0084	0.0091	0.0085	0.0069	0.0076	0.0077	0.0087	0.0069	0.0089	0.007	0.0079	0.0055	0.0085	0.0083	0.0089
PC(O-39:8)	PC	alkyl-acyl	2858	M+H	PC(O-39:8)	(O-39:8)	(O-39:8)	801.567	20.486	C47 H80 N1 O7 P1	2	4	0	100	B	0.0057	0.0057	0.007	0.0063	0.0045	0.0055	0.0056	0.004	0.0057	0.0061	0.005	0.0041	0.006	0.0062	0.0062	0.0056	0.0059	0.0056	0.0062	0.0066	0.0055
PC(O-39:8)	PC	alkyl-acyl	2859	M+H	PC(O-39:8)	(O-39:8)	(O-39:8)	801.567	20.703	C47 H80 N1 O7 P1	1	4	0	66.7	C	0.0043	0.0033	0.0039	0.0035	0.0041	0.0046	0.0036	0.0037	0.0038	0.0037	0.0035	0.0035	0.0033	0.0043	0.0034	0.0034	0.0039	0.0031	0.0031	0.0028	0.003
PC(18:0_19:1)	PC	diacyl	2865	M+H	PC(37:1)	(18:0_19:1)	(37:1)	801.625	20.477	C45 H88 N1 O8 P1	2	2	14	100	A	0.0471	0.0484	0.0498	0.04	0.0389	0.0409	0.0395	0.0449	0.0431	0.0311	0.0329	0.0362	0.0337	0.0365	0.0389	0.0336	0.0421	0.0394	0.0391	0.0356	0.0354
PC(18:2_20:5)	PC	diacyl	2869	M+H	PC(38:7)	(18:2_20:5)	(38:7)	803.547	12.227	C46 H78 N1 O8 P1	2	4	11	100	A	0.0628	0.0681	0.065	0.056	0.0569	0.0596	0.0558	0.0609	0.0582	0.046	0.047	0.051	0.0599	0.0567	0.0584	0.0421	0.0463	0.0384	0.0514	0.0565	0.0583
PC(16:1_22:6)	PC	diacyl	2870	M+H	PC(38:7)	(16:1_22:6)	(38:7)	803.547	12.633	C46 H78 N1 O8 P1	2	4	11	100	A	0.056	0.0532	0.0576	0.0461	0.0496	0.053	0.0478	0.0504	0.0496	0.0426	0.0423	0.0462	0.0508	0.0537	0.0514	0.0447	0.0438	0.0369	0.0495	0.0473	0.048
PC(O-17:3_22:4)	PC	alkyl-acyl	3222	M+H	PC(O-39:7)	(O-17:3_22:4)	(O-39:7)	803.583	19.637	C47 H82 N1 O7 P1	1	2	0	66.7	B	0.0095	0.0099	0.0112	0.0075	0.0085	0.0078	0.0083	0.0078	0.0082	0.0072	0.0072	0.0069	0.009	0.0083	0.0093	0.0073	0.0066	0.0055	0.0076	0.0078	0.0083
PC(O-17:1_22:6)	PC	alkyl-acyl	3223	M+H	PC(O-39:7)	(O-17:1_22:6)	(O-39:7)	803.583	20.524	C47 H82 N1 O7 P1	1	2	0	66.7	B	0.0501	0.0587	0.0566	0.0466	0.0419	0.0442	0.0462	0.0554	0.0501	0.0423	0.0419	0.041	0.0462	0.0405	0.047	0.0386	0.0442	0.0369	0.0433	0.0441	0.0423
PC(O-22:0_16:0)	PC	alkyl-acyl	3224	M+H	PC(O-38:0)	(O-22:0_16:0)	(O-38:0)	803.677	22.226	C46 H94 N1 O7 P1	2	2	0	100	A	0.0199	0.021	0.0208	0.0103	0.0097	0.01	0.0149	0.0166	0.0151	0.0138	0.0134	0.0151	0.0124	0.0125	0.0146	0.0145	0.0158	0.0156	0.0128	0.012	0.0145
PC(18:2_20:4)	PC	diacyl	2040	M+H	PC(38:6)	(18:2_20:4)	(38:6)	805.562	13.614	C46 H80 N1 O8 P1	4	4	24	100	A	1.6247	1.6886	1.6483	1.2733	1.3246	1.3227	1.2871	1.4587	1.4378	1.0692	1.1328	1.1808	1.3703	1.3115	1.3762	1.0655	1.2081	0.9764	1.2334	1.3389	1.3507
PC(16:0_22:6)	PC	diacyl	2042	M+H	PC(38:6)	(16:0_22:6)	(38:6)	805.562	14.591	C46 H80 N1 O8 P1	4	4	24	100	A	3.3317	3.4492	3.3771	2.9626	2.9787	2.882	3.0726	3.2398	3.2154	2.641	2.5704	2.7491	3.0215	2.9164	3.0135	2.613	2.8135	2.3463	2.8184	2.9649	2.9433
PC(O-39:6)	PC	alkyl-acyl	3288	M+H	PC(O-39:6)	(O-39:6)	(O-39:6)	805.599	17.557	C47 H84 N1 O7 P1	1	1	0	66.7	C	0.0109	0.0091	0.0095	0.0092	0.0091	0.009	0.0091	0.0101	0.0097	0.0071	0.0078	0.0083	0.0084	0.0082	0.0091	0.0066	0.0088	0.0058	0.0084	0.0096	0.0103
PC(18:1_20:4)	PC	diacyl	2124	M+H	PC(38:5)	(18:1_20:4)	(38:5)	807.578	15.351	C46 H82 N1 O8 P1	3	6	24	100	A	3.9136	3.8783	3.9842	3.4115	3.5972	3.5773	3.5255	3.7495	3.7041	3.2288	3.1646	3.33	3.5089	3.5812	3.5138	3.0859	3.3856	2.9309	3.2601	3.4793	3.2764
PC(18:0_20:5)	PC	diacyl	2125	M+H	PC(38:5)	(18:0_20:5)	(38:5)	807.578	16.162	C46 H82 N1 O8 P1	3	6	24	100	A	0.2701	0.2716	0.3835	0.294	0.2852	0.2757	0.2939	0.3333	0.3022	0.2598	0.2531	0.2781	0.3183	0.2496	0.2483	0.2215	0.2589	0.235	0.2759	0.3119	0.2412
PC(O-39:5)	PC	alkyl-acyl	3289	M+H	PC(O-39:5)	(O-39:5)	(O-39:5)	807.614	18.392	C47 H86 N1 O7 P1	1	1	0	66.7	C	0.016	0.0145	0.017	0.0111	0.0117	0.0124	0.0112	0.0129	0.0114	0.0059	0.0116	0.0123	0.0105	0.0136	0.0105	0.0092	0.0107	0.0109	0.0097	0.0124	0.0093
PC(18:2_20:2)	PC	diacyl	2244	M+H	PC(38:4)	(18:2_20:2)	(38:4)	809.593	16.241	C46 H84 N1 O8 P1	3	6	22	100	A	0.4921	0.5138	0.5532	0.4425	0.4786	0.4104	0.4614	0.4914	0.4898	0.3585	0.3745	0.4176	0.4901	0.4823	0.4784	0.368	0.4462	0.3682	0.4327	0.4488	0.4482
PC(18:0_20:4)	PC	diacyl	2253	M+H	PC(38:4)	(18:0_20:4)	(38:4)	809.593	17.779	C46 H84 N1 O8 P1	4	6	22	100	A	5.7044	5.8184	6.1366	5.1172	5.351	5.2475	5.118	5.7376	5.8806	4.0494	4.4699	4.4273	5.1406	5.088	5.3332	4.3634	4.8052	4.0741	4.8563	5.2123	5.3071
PC(20:1_18:2)	PC	diacyl	2884	M+H	PC(38:3)	(20:1_18:2)	(38:3)	811.609	18.143	C46 H86 N1 O8 P1	2	6	19	100	A	0.4214	0.4776	0.431	0.4137	0.4084	0.5163	0.3669	0.4349	0.396	0.2867	0.3172	0.3556	0.3825	0.4122	0.3995	0.3471	0.386	0.3509	0.369	0.4129	0.3655
PC(18:0_20:3)	PC	diacyl	2886	M+H	PC(38:3)	(18:0_20:3)	(38:3)	811.609	18.952	C46 H86 N1 O8 P1	3	6	19	100	A	0.7448	0.773	0.7653	0.6762	0.6681	0.7356	0.6801	0.7598	0.7091	0.5827	0.5941	0.5767	0.6655	0.604	0.7036	0.6083	0.6369	0.5456	0.6338	0.6986	0.6473
PC(P-22:7_18:1)	PC	alkenyl-acyl	3227	M+H	PC(P-40:8)	(P-22:7_18:1)	(P-40:8)	813.567	12.938	C48 H80 N1 O7 P1	1	1	0	100	C	0.0056	0.005	0.0051	0.005	0.0042	0.0042	0.0041	0.0049	0.0043	0.0036	0.0038	0.0041	0.0039	0.0042	0.0046	0.0032	0.0047	0.0032	0.0036	0.0042	0.0044
PC(18:0_20:2)	PC	diacyl	2893	M+H	PC(38:2)	(18:0_20:2)	(38:2)	813.625	20.086	C46 H88 N1 O8 P1	3	2	19	100	A	0.5203	0.5683	0.5613	0.4578	0.4605	0.4957	0.4458	0.5134	0.4982	0.3904	0.4006	0.4382	0.4596	0.4475	0.4785	0.4569	0.4785	0.4507	0.4526	0.4753	0.4704
PC(O-18:2_22:6)	PC	alkyl-acyl	2900	M+H	PC(O-40:8)	(O-18:2_22:6)	(O-40:8)	815.583	14.451	C48 H82 N1 O7 P1	2	3	0	100	A	0.1139	0.1135	0.1147	0.1035	0.1008	0.1042	0.0968	0.1086	0.1066	0.0888	0.085	0.0878	0.1015	0.0987	0.109	0.0846	0.0924	0.0769	0.0954	0.1014	0.1041
PC(P-22:7_18:0)	PC	alkenyl-acyl	3229	M+H	PC(P-40:7)	(P-22:7_18:0)	(P-40:7)	815.583	15.936	C48 H82 N1 O7 P1	1	1	0	100	B	0.0087	0.0093	0.0109	0.0081	0.0082	0.0079	0.0092	0.0086	0.0069	0.0065	0.0069	0.0071	0.0085	0.008	0.0077	0.006	0.0064	0.0059	0.0079	0.0073	0.0075
PC(16:0_22:1)	PC	diacyl	2903	M+H	PC(38:1)	(16:0_22:1)	(38:1)	815.64	20.8	C46 H90 N1 O8 P1	2	2	22	100	A	0.1352	0.1359	0.1328	0.1093	0.1134	0.1211	0.1027	0.1129	0.1158	0.0984	0.1023	0.112	0.115	0.106	0.1208	0.118	0.1206	0.1212	0.1044	0.1165	0.1139
PC(39:7)	PC	diacyl	3230	M+H	PC(39:7)	(39:7)	(39:7)	817.562	16.753	C47 H80 N1 O8 P1	1	1	2	66.7	C	0.0053	0.0067	0.0069	0.0065	0.0068	0.008	0.0075	0.0071	0.0072	0.0068	0.0066	0.0071	0.0079	0.0086	0.0067	0.0071	0.0069	0.007	0.0068	0.0064	0.007
PC(O-40:7)	PC	alkyl-acyl	2907	M+H	PC(O-40:7)	(O-40:7)	(O-40:7)	817.599	15.209	C48 H84 N1 O7 P1	2	7	0	100	B	0.0351	0.0339	0.0392	0.0318	0.0306	0.0331	0.0337	0.0342	0.0355	0.0288	0.026	0.0278	0.0338	0.0335	0.0363	0.0284	0.0306	0.0265	0.0309	0.0318	0.0324
PC(O-20:3_20:4)	PC	alkyl-acyl	2908	M+H	PC(O-40:7)	(O-20:3_20:4)	(O-40:7)	817.599	15.686	C48 H84 N1 O7 P1	2	7	0	100	A	0.0458	0.046	0.052	0.0327	0.0383	0.0328	0.0375	0.0423	0.0395	0.0304	0.038	0.0366	0.0389	0.0409	0.0426	0.0302	0.035	0.0302	0.0358	0.0301	0.0377
PC(O-18:3_22:4)	PC	alkyl-acyl	2909	M+H	PC(O-40:7)	(O-18:3_22:4)	(O-40:7)	817.599	16.403	C48 H84 N1 O7 P1	2	7	0	100	A	1.043	1.0005	1.0839	0.8832	0.9203	0.8455	0.8672	0.986	0.9382	0.7121	0.7608	0.7647	0.9349	0.8602	0.8944	0.7339	0.7781	0.6667	0.8135	0.9023	0.9011
PC(O-40:7)	PC	alkyl-acyl	2912	M+H	PC(O-40:7)	(O-40:7)	(O-40:7)	817.599	18.436	C48 H84 N1 O7 P1	1	7	0	66.7	C	0.0113	0.0148	0.0163	0.0116	0.0134	0.0163	0.0077	0.0153	0.0123	0.0096	0.0094	0.0107	0.0075	0.0114	0.0094	0.0064	0.0115	0.0104	0.0091	0.0093	0.0073
PC(16:0_22:0)	PC	diacyl	3231	M+H	PC(38:0)	(16:0_22:0)	(38:0)	817.656	21.619	C46 H92 N1 O8 P1	2	2	10	100	A	0.024	0.0239	0.0263	0.0131	0.0126	0.0134	0.0177	0.0227	0.0177	0.018	0.0176	0.018	0.0163	0.016	0.0168	0.0184	0.019	0.0199	0.0179	0.0173	0.0172
PC(O-39:0)	PC	alkyl-acyl	3232	M+H	PC(O-39:0)	(O-39:0)	(O-39:0)	817.692	22.224	C47 H96 N1 O7 P1	1	1	0	100	C	0.0016	0.0014	0.0016	0.0018	0.0017	0.0019	0.0013	0.0017	0.0015	0.0013	0.0015	0.0015	0.0022	0.0016	0.0026	0.0015	0.0013	0.0016	0.0014	0.0019	0.0017
PC(P-41:12)	PC	alkenyl-acyl	3233	M+H	PC(P-41:12)	(P-41:12)	(P-41:12)	819.52	13.937	C49 H74 N1 O7 P1	1	1	0	100	C	0.0057	0.0039	0.0053	0.0053	0.0061	0.0067	0.0048	0.0056	0.0057	0.0031	0.0028	0.0032	0.0034	0.0034	0.0028	0.0031	0.0024	0.003	0.0046	0.0043	0.0037
PC(P-41:12)	PC	alkenyl-acyl	3234	M+H	PC(P-41:12)	(P-41:12)	(P-41:12)	819.52	15.108	C49 H74 N1 O7 P1	1	1	0	100	C	0.009	0.0073	0.0079	0.0096	0.01	0.0103	0.0084	0.0084	0.009	0.0084	0.0062	0.0061	0.005	0.0048	0.0036	0.0078	0.0086	0.007	0.0066	0.0072	0.0082
PC(17:0_22:6)	PC	diacyl	2917	M+H	PC(39:6)	(17:0_22:6)	(39:6)	819.578	15.899	C47 H82 N1 O8 P1	2	2	6	100	A	0.0499	0.0507	0.0462	0.0425	0.0375	0.0426	0.0446	0.0469	0.0438	0.0371	0.0365	0.0406	0.0451	0.0426	0.0447	0.0362	0.0421	0.0329	0.0415	0.0437	0.0426
PC(O-40:6)	PC	alkyl-acyl	2921	M+H	PC(O-40:6)	(O-40:6)	(O-40:6)	819.614	16.892	C48 H86 N1 O7 P1	2	4	0	100	B	0.0165	0.0219	0.0206	0.019	0.017	0.0151	0.0177	0.0204	0.0181	0.0116	0.0136	0.0154	0.0198	0.0161	0.0148	0.0153	0.0174	0.0137	0.0139	0.0159	0.0159
PC(O-18:1_22:5)	PC	alkyl-acyl	2922	M+H	PC(O-40:6)	(O-18:1_22:5)	(O-40:6)	819.614	17.193	C48 H86 N1 O7 P1	2	4	0	100	A	0.1624	0.1702	0.176	0.1611	0.1742	0.1793	0.163	0.1624	0.162	0.1395	0.1375	0.1489	0.165	0.1562	0.1667	0.1526	0.1566	0.1284	0.1562	0.1654	0.1574
PC(O-18:0_22:6)	PC	alkyl-acyl	2924	M+H	PC(O-40:6)	(O-18:0_22:6)	(O-40:6)	819.614	18.939	C48 H86 N1 O7 P1	2	4	0	100	A	0.2231	0.2309	0.2269	0.1884	0.193	0.2011	0.2046	0.2194	0.2229	0.1712	0.1724	0.1642	0.194	0.1759	0.2013	0.1624	0.1829	0.151	0.1815	0.203	0.188
PC(39:5)	PC	diacyl	2933	M+H	PC(39:5)	(39:5)	(39:5)	821.593	14.411	C47 H84 N1 O8 P1	2	3	8	100	B	0.0363	0.0351	0.0375	0.0332	0.0331	0.0342	0.0329	0.0352	0.0346	0.0282	0.0278	0.0283	0.0328	0.033	0.035	0.0275	0.0305	0.023	0.0309	0.0333	0.0333
PC(19:1_20:4)	PC	diacyl	2935	M+H	PC(39:5)	(19:1_20:4)	(39:5)	821.593	16.664	C47 H84 N1 O8 P1	2	3	8	100	A	0.0782	0.0801	0.0833	0.065	0.0692	0.0693	0.069	0.0763	0.0759	0.0523	0.0523	0.0584	0.0672	0.0635	0.0689	0.0518	0.0595	0.0478	0.0635	0.0676	0.0698
PC(O-40:5)	PC	alkyl-acyl	2939	M+H	PC(O-40:5)	(O-40:5)	(O-40:5)	821.63	18.591	C48 H88 N1 O7 P1	1	2	0	66.7	C	0.0132	0.0129	0.0161	0.0099	0.0153	0.0142	0.0129	0.0126	0.0106	0.0085	0.0112	0.0126	0.0125	0.0132	0.0125	0.0093	0.0133	0.0111	0.0138	0.0105	0.0135
PC(O-18:0_22:5)	PC	alkyl-acyl	2941	M+H	PC(O-40:5)	(O-18:0_22:5)	(O-40:5)	821.63	19.623	C48 H88 N1 O7 P1	2	2	0	100	A	0.1404	0.1416	0.155	0.1235	0.1263	0.1359	0.1266	0.1286	0.1313	0.1006	0.0987	0.1093	0.1192	0.1201	0.1247	0.1082	0.1206	0.0924	0.1183	0.119	0.1241
PC(O-40:5)	PC	alkyl-acyl	2942	M+H	PC(O-40:5)	(O-40:5)	(O-40:5)	821.63	20.116	C48 H88 N1 O7 P1	1	2	0	100	C	0.019	0.0199	0.0142	0.0148	0.0174	0.0137	0.0192	0.015	0.0181	0.0154	0.0112	0.0164	0.0178	0.0165	0.0173	0.0155	0.0159	0.0131	0.0173	0.0194	0.0168
PC(39:4)	PC	diacyl	2945	M+H	PC(39:4)	(39:4)	(39:4)	823.609	18.442	C47 H86 N1 O8 P1	1	3	10	100	C	0.0132	0.0136	0.0162	0.0103	0.0105	0.0142	0.0087	0.0124	0.0094	0.0086	0.0082	0.0124	0.0055	0.0085	0.0136	0.0063	0.0099	0.0099	0.009	0.0104	0.01
PC(39:4)	PC	diacyl	2946	M+H	PC(39:4)	(39:4)	(39:4)	823.609	18.74	C47 H86 N1 O8 P1	1	3	10	100	C	0.0147	0.0132	0.0133	0.012	0.0123	0.0118	0.0126	0.012	0.0131	0.008	0.0079	0.0123	0.0114	0.0131	0.0111	0.0106	0.011	0.0085	0.0111	0.0122	0.0129
PC(19:0_20:4)	PC	diacyl	2947	M+H	PC(39:4)	(19:0_20:4)	(39:4)	823.609	19.228	C47 H86 N1 O8 P1	2	3	10	100	A	0.1095	0.1114	0.1157	0.0916	0.0991	0.1027	0.1036	0.1018	0.099	0.0722	0.0772	0.0885	0.101	0.0898	0.0945	0.0834	0.0929	0.0785	0.0907	0.0967	0.0999
PC(21:4_18:0)	PC	diacyl	2948	M+H	PC(39:4)	(21:4_18:0)	(39:4)	823.609	20.69	C47 H86 N1 O8 P1	1	3	10	100	C	0.0237	0.0245	0.024	0.0195	0.0157	0.0175	0.0203	0.0226	0.0204	0.0172	0.0172	0.0185	0.021	0.0166	0.0196	0.0186	0.0194	0.0165	0.017	0.0176	0.0176
PC(O-22:2_18:2)	PC	alkyl-acyl	2951	M+H	PC(O-40:4)	(O-22:2_18:2)	(O-40:4)	823.645	20.265	C48 H90 N1 O7 P1	2	5	0	100	A	0.0721	0.0831	0.0831	0.0637	0.0655	0.0704	0.056	0.0655	0.0582	0.0489	0.0555	0.0631	0.0505	0.0595	0.0659	0.046	0.0606	0.0565	0.0538	0.0577	0.0561
PC(O-18:0_22:4)	PC	alkyl-acyl	2952	M+H	PC(O-40:4)	(O-18:0_22:4)	(O-40:4)	823.645	20.488	C48 H90 N1 O7 P1	2	5	0	100	A	0.041	0.0411	0.0396	0.0317	0.0299	0.0347	0.0349	0.036	0.0337	0.0256	0.0282	0.0297	0.0386	0.0306	0.0306	0.0311	0.0304	0.0287	0.0327	0.0334	0.0328
PC(O-20:0_20:4)	PC	alkyl-acyl	2953	M+H	PC(O-40:4)	(O-20:0_20:4)	(O-40:4)	823.645	20.74	C48 H90 N1 O7 P1	2	5	0	100	A	0.1549	0.1514	0.1535	0.1338	0.1392	0.1335	0.1303	0.141	0.1339	0.1119	0.1049	0.1205	0.146	0.1213	0.1333	0.1273	0.1285	0.1075	0.1291	0.1236	0.1331
PC(40:10)	PC	diacyl	3235	M+H	PC(40:10)	(40:10)	(40:10)	825.531	12.229	C48 H76 N1 O8 P1	1	1	3	100	C	0.0027	0.003	0.0032	0.0024	0.0027	0.0029	0.0023	0.0026	0.0023	0.0019	0.0018	0.0022	0.0026	0.0026	0.0023	0.0023	0.002	0.0016	0.0025	0.0022	0.0027
PC(39:3)	PC	diacyl	3236	M+H	PC(39:3)	(39:3)	(39:3)	825.625	19.911	C47 H88 N1 O8 P1	1	1	12	100	C	0.0083	0.009	0.0086	0.0068	0.0076	0.0078	0.008	0.009	0.0088	0.0066	0.0066	0.0066	0.0075	0.0081	0.0072	0.0081	0.0074	0.006	0.0077	0.0078	0.0074
PC(40:9)	PC	diacyl	3237	M+H	PC(40:9)	(40:9)	(40:9)	827.547	11.871	C48 H78 N1 O8 P1	1	1	6	100	C	0.0164	0.0152	0.0153	0.0139	0.0138	0.0148	0.0131	0.0149	0.0145	0.0109	0.0108	0.01	0.0146	0.0132	0.0126	0.0099	0.0105	0.009	0.0113	0.0131	0.0143
PC(39:2)	PC	diacyl	3239	M+H	PC(39:2)	(39:2)	(39:2)	827.64	22.104	C47 H90 N1 O8 P1	1	1	12	100	C	0.0024	0.0028	0.0028	0.0024	0.0018	0.002	0.0024	0.0024	0.0024	0.0021	0.0026	0.0022	0.004	0.004	0.004	0.0023	0.0019	0.0025	0.0027	0.0026	0.0026
PC(O-40:2)	PC	alkyl-acyl	3240	M+H	PC(O-40:2)	(O-40:2)	(O-40:2)	827.677	21.523	C48 H94 N1 O7 P1	1	1	0	100	C	0.0222	0.0205	0.0211	0.0156	0.0145	0.0159	0.0161	0.0188	0.016	0.015	0.0151	0.0162	0.0162	0.0161	0.0174	0.0175	0.0168	0.0169	0.0167	0.0158	0.0145
PC(18:2_22:6)	PC	diacyl	2963	M+H	PC(40:8)	(18:2_22:6)	(40:8)	829.562	13.177	C48 H80 N1 O8 P1	3	3	8	100	A	0.4418	0.45	0.4526	0.3684	0.3722	0.3665	0.3742	0.4047	0.3818	0.2965	0.2942	0.3225	0.3815	0.3724	0.3915	0.2862	0.3159	0.2521	0.3402	0.3749	0.3845
PC(O-19:2_22:6)	PC	alkyl-acyl	3241	M+H	PC(O-41:8)	(O-19:2_22:6)	(O-41:8)	829.599	20.503	C49 H84 N1 O7 P1	1	1	0	100	B	0.0069	0.0075	0.0076	0.0058	0.0061	0.006	0.0058	0.0066	0.0065	0.0055	0.0053	0.0052	0.0057	0.0059	0.006	0.0045	0.0058	0.0048	0.0055	0.006	0.0056
PC(18:2_22:5)	PC	diacyl	2586	M+H	PC(40:7)	(18:2_22:5)	(40:7)	831.578	13.824	C48 H82 N1 O8 P1	3	4	12	100	A	0.086	0.0844	0.0931	0.0767	0.0766	0.078	0.0757	0.081	0.0802	0.0621	0.0659	0.0649	0.0764	0.0766	0.0779	0.0606	0.0653	0.0557	0.0699	0.076	0.0791
PC(18:1_22:6)	PC	diacyl	2589	M+H	PC(40:7)	(18:1_22:6)	(40:7)	831.578	14.867	C48 H82 N1 O8 P1	3	4	12	100	A	0.4768	0.4746	0.4748	0.4109	0.4202	0.4256	0.393	0.4382	0.449	0.3242	0.3334	0.3593	0.4218	0.4199	0.431	0.3276	0.4009	0.3028	0.3797	0.402	0.4152
PC(18:2_22:4)	PC	diacyl	2640	M+H	PC(40:6)	(18:2_22:4)	(40:6)	833.593	15.32	C48 H84 N1 O8 P1	2	6	13	100	A	0.106	0.1005	0.097	0.0789	0.0874	0.0853	0.0854	0.0843	0.0822	0.0767	0.075	0.0841	0.0837	0.0984	0.09	0.0815	0.0844	0.0674	0.0778	0.0925	0.0865
PC(20:2_20:4)	PC	diacyl	2641	M+H	PC(40:6)	(20:2_20:4)	(40:6)	833.593	15.876	C48 H84 N1 O8 P1	3	6	13	100	A	0.7005	0.6676	0.6891	0.6287	0.6299	0.5998	0.6463	0.6583	0.6548	0.5328	0.5003	0.5691	0.6671	0.5954	0.6323	0.531	0.5829	0.4632	0.6008	0.5947	0.6287
PC(18:0_22:6)	PC	diacyl	2644	M+H	PC(40:6)	(18:0_22:6)	(40:6)	833.593	17.192	C48 H84 N1 O8 P1	3	6	13	100	A	1.2921	1.2523	1.2384	1.1084	1.1867	1.1288	1.1764	1.1188	1.1986	1.0709	0.9384	1.0209	1.0963	1.0409	1.133	1.0313	1.0406	0.887	1.0757	1.1236	1.0586
PC(22:5_18:0)	PC	diacyl	2666	M+H	PC(40:5)	(22:5_18:0)	(40:5)	835.609	16.81	C48 H86 N1 O8 P1	2	8	24	100	B	0.078	0.0801	0.0799	0.0718	0.0736	0.0717	0.0756	0.0761	0.0736	0.0567	0.058	0.062	0.0677	0.0683	0.0699	0.0604	0.0649	0.0542	0.0672	0.0762	0.066
PC(20:1_20:4)	PC	diacyl	2672	M+H	PC(40:5)	(20:1_20:4)	(40:5)	835.609	17.941	C48 H86 N1 O8 P1	2	8	24	100	A	0.6535	0.6832	0.7616	0.6369	0.6541	0.6734	0.6798	0.6376	0.6909	0.4506	0.4839	0.5485	0.5734	0.6626	0.602	0.5299	0.5726	0.4964	0.5616	0.6215	0.5775
PC(22:5_18:0)	PC	diacyl	2676	M+H	PC(40:5)	(22:5_18:0)	(40:5)	835.609	18.84	C48 H86 N1 O8 P1	1	8	24	66.7	C	0.057	0.0521	0.0479	0.0515	0.0401	0.0407	0.0496	0.0485	0.0414	0.0345	0.0353	0.0276	0.0377	0.0383	0.0419	0.0347	0.0347	0.0301	0.0326	0.0437	0.0391
PC(18:2_22:2)	PC	diacyl	2968	M+H	PC(40:4)	(18:2_22:2)	(40:4)	837.625	18.747	C48 H88 N1 O8 P1	2	6	24	100	A	0.0825	0.0846	0.0938	0.0773	0.0859	0.0803	0.0781	0.0871	0.0797	0.0593	0.0581	0.0675	0.0762	0.0759	0.0791	0.0651	0.066	0.0628	0.0685	0.0778	0.0772
PC(16:0_24:4)	PC	diacyl	2969	M+H	PC(40:4)	(16:0_24:4)	(40:4)	837.625	19.213	C48 H88 N1 O8 P1	2	6	24	100	A	0.1452	0.1347	0.1369	0.1242	0.1324	0.1277	0.1284	0.1378	0.1297	0.1014	0.1105	0.1143	0.135	0.1279	0.1374	0.1051	0.1184	0.0969	0.1226	0.1318	0.1283
PC(18:0_22:4)	PC	diacyl	2970	M+H	PC(40:4)	(18:0_22:4)	(40:4)	837.625	19.61	C48 H88 N1 O8 P1	3	6	24	100	A	0.3995	0.4298	0.4183	0.3474	0.3797	0.3819	0.3469	0.3738	0.3815	0.2979	0.296	0.3202	0.3539	0.3461	0.3762	0.3173	0.3316	0.2817	0.3551	0.3568	0.3665
PC(20:0_20:4)	PC	diacyl	2971	M+H	PC(40:4)	(20:0_20:4)	(40:4)	837.625	20.057	C48 H88 N1 O8 P1	2	6	24	100	A	0.0875	0.0988	0.1029	0.0923	0.0802	0.0857	0.0973	0.0904	0.0942	0.0773	0.0738	0.0795	0.0951	0.0852	0.084	0.0775	0.0732	0.0735	0.0822	0.0904	0.085
PC(P-24:8_18:1)	PC	alkenyl-acyl	3242	M+H	PC(P-42:9)	(P-24:8_18:1)	(P-42:9)	839.583	13.634	C50 H82 N1 O7 P1	1	1	0	100	C	0.0128	0.0142	0.0133	0.0112	0.0123	0.0133	0.0128	0.0134	0.0128	0.0101	0.0107	0.0108	0.0122	0.0126	0.0123	0.0087	0.0103	0.0078	0.0115	0.0123	0.0124
PC(22:1_18:2)	PC	diacyl	2976	M+H	PC(40:3)	(22:1_18:2)	(40:3)	839.64	20.191	C48 H90 N1 O8 P1	2	2	20	100	A	0.079	0.0858	0.0882	0.0664	0.0724	0.0784	0.069	0.079	0.0725	0.0626	0.0593	0.0692	0.0655	0.0698	0.0719	0.0587	0.073	0.068	0.0613	0.0728	0.072
PC(18:1_22:1)	PC	diacyl	2983	M+H	PC(40:2)	(18:1_22:1)	(40:2)	841.656	20.954	C48 H92 N1 O8 P1	2	3	18	100	A	0.0509	0.0518	0.0517	0.038	0.0395	0.0373	0.0357	0.0309	0.038	0.0381	0.0379	0.0392	0.0406	0.0371	0.0425	0.0411	0.0427	0.0429	0.0407	0.0416	0.0431
PC(O-42:8)	PC	alkyl-acyl	3243	M+H	PC(O-42:8)	(O-42:8)	(O-42:8)	843.614	16.836	C50 H86 N1 O7 P1	2	2	0	100	B	0.0313	0.031	0.0322	0.0289	0.0288	0.031	0.0306	0.0302	0.0267	0.0233	0.0229	0.0254	0.0267	0.0255	0.0285	0.021	0.0238	0.02	0.0262	0.0277	0.0268
PC(16:0_24:1)	PC	diacyl	2987	M+H	PC(40:1)	(16:0_24:1)	(40:1)	843.672	21.562	C48 H94 N1 O8 P1	2	2	20	100	A	0.0448	0.0448	0.047	0.0341	0.0327	0.032	0.0374	0.0433	0.0364	0.0352	0.033	0.0356	0.0341	0.0334	0.037	0.0352	0.037	0.0378	0.0343	0.0363	0.0361
PC(O-42:7)	PC	alkyl-acyl	3245	M+H	PC(O-42:7)	(O-42:7)	(O-42:7)	845.63	17.665	C50 H88 N1 O7 P1	1	1	0	100	C	0.0117	0.0128	0.0159	0.0119	0.0116	0.0117	0.0106	0.0134	0.0122	0.0081	0.0101	0.0102	0.0106	0.0105	0.0106	0.0085	0.01	0.0086	0.0104	0.0125	0.0111
PC(O-42:7)	PC	alkyl-acyl	3247	M+H	PC(O-42:7)	(O-42:7)	(O-42:7)	845.63	18.971	C50 H88 N1 O7 P1	1	1	0	100	C	0.0109	0.0114	0.0128	0.0106	0.0088	0.0126	0.0098	0.0138	0.0102	0.0092	0.0095	0.0083	0.0121	0.0103	0.013	0.0089	0.0077	0.008	0.0111	0.0107	0.0107
PC(16:0_24:0)	PC	diacyl	2989	M+H	PC(40:0)	(16:0_24:0)	(40:0)	845.687	22.294	C48 H96 N1 O8 P1	2	2	9	100	A	0.0293	0.0326	0.0304	0.0174	0.0157	0.0155	0.0196	0.0251	0.0236	0.0217	0.0209	0.0228	0.02	0.0205	0.0219	0.0229	0.0214	0.024	0.0206	0.0198	0.0189
PC(O-20:6_23:7)	PC	alkyl-acyl	3248	M+H	PC(O-43:13)	(O-20:6_23:7)	(O-43:13)	847.552	17.731	C51 H78 N1 O7 P1	1	2	0	66.7	B	0.005	0.0046	0.006	0.0064	0.0065	0.0067	0.0052	0.0051	0.0064	0.0053	0.0046	0.0038	0.0036	0.0032	0.0034	0.0038	0.0034	0.0038	0.0052	0.0046	0.0041
PC(41:6)	PC	diacyl	3250	M+H	PC(41:6)	(41:6)	(41:6)	847.609	18.625	C49 H86 N1 O8 P1	1	1	2	100	C	0.0213	0.0217	0.0231	0.0176	0.0203	0.0198	0.0181	0.0207	0.0181	0.0139	0.0148	0.0171	0.0157	0.0166	0.0179	0.0122	0.0161	0.0136	0.0168	0.0157	0.0175
PC(O-42:6)	PC	alkyl-acyl	2994	M+H	PC(O-42:6)	(O-42:6)	(O-42:6)	847.645	19.436	C50 H90 N1 O7 P1	1	3	0	100	C	0.0118	0.0125	0.0118	0.0098	0.0112	0.0113	0.0116	0.0115	0.0102	0.008	0.0071	0.0089	0.0099	0.0081	0.0079	0.0095	0.0096	0.0068	0.0097	0.0108	0.0108
PC(O-22:2_20:4)	PC	alkyl-acyl	2996	M+H	PC(O-42:6)	(O-22:2_20:4)	(O-42:6)	847.645	19.808	C50 H90 N1 O7 P1	2	3	0	100	A	0.0354	0.0348	0.0368	0.0314	0.0336	0.0341	0.0313	0.035	0.0357	0.0311	0.027	0.0282	0.0321	0.0307	0.0297	0.0272	0.03	0.0242	0.0346	0.0292	0.0304
PC(O-20:0_22:6)	PC	alkyl-acyl	2997	M+H	PC(O-42:6)	(O-20:0_22:6)	(O-42:6)	847.645	20.523	C50 H90 N1 O7 P1	2	3	0	100	A	0.0467	0.0477	0.0462	0.0366	0.0386	0.0381	0.0382	0.0434	0.0414	0.0312	0.0336	0.0365	0.0377	0.0359	0.0384	0.0294	0.0361	0.0287	0.0371	0.0364	0.0382
PC(O-42:5)	PC	alkyl-acyl	3003	M+H	PC(O-42:5)	(O-42:5)	(O-42:5)	849.661	20.344	C50 H92 N1 O7 P1	2	3	0	100	B	0.0268	0.0284	0.0285	0.0236	0.0251	0.0272	0.0192	0.0248	0.0226	0.0175	0.0219	0.0247	0.0207	0.0237	0.0254	0.0185	0.0233	0.0201	0.0215	0.0227	0.0208
PC(O-22:1_20:4)	PC	alkyl-acyl	3004	M+H	PC(O-42:5)	(O-22:1_20:4)	(O-42:5)	849.661	20.725	C50 H92 N1 O7 P1	2	3	0	100	A	0.0877	0.0802	0.0842	0.0692	0.0758	0.0754	0.0738	0.0747	0.0735	0.0653	0.057	0.0716	0.0828	0.0744	0.0788	0.0708	0.0653	0.0566	0.0763	0.0708	0.0649
PC(42:11)	PC	diacyl	3253	M+H	PC(42:11)	(42:11)	(42:11)	851.547	11.453	C50 H78 N1 O8 P1	1	1	2	100	C	0.0041	0.0047	0.0045	0.0041	0.0038	0.0044	0.0039	0.0043	0.0041	0.0026	0.0024	0.0038	0.004	0.0038	0.0039	0.0027	0.0033	0.0026	0.0038	0.0039	0.0044
PC(O-22:0_20:4)	PC	alkyl-acyl	3256	M+H	PC(O-42:4)	(O-22:0_20:4)	(O-42:4)	851.677	21.519	C50 H94 N1 O7 P1	2	2	0	100	A	0.0218	0.0237	0.0237	0.0187	0.0191	0.0196	0.0183	0.0204	0.0193	0.0158	0.0166	0.0174	0.0192	0.0178	0.019	0.0157	0.0191	0.0153	0.0184	0.0186	0.0197
PC(20:4_22:6)	PC	diacyl	3007	M+H	PC(42:10)	(20:4_22:6)	(42:10)	853.562	12.718	C50 H80 N1 O8 P1	3	2	3	100	A	0.1001	0.1039	0.1057	0.087	0.087	0.0914	0.0906	0.0955	0.0877	0.0736	0.0745	0.0817	0.094	0.0884	0.0924	0.0709	0.0767	0.0641	0.0839	0.0884	0.0917
PC(20:4_22:5)	PC	diacyl	3011	M+H	PC(42:9)	(20:4_22:5)	(42:9)	855.578	13.46	C50 H82 N1 O8 P1	2	3	4	100	A	0.0441	0.0481	0.0487	0.0399	0.0418	0.042	0.04	0.0432	0.0425	0.0347	0.0347	0.0354	0.0408	0.0425	0.0397	0.031	0.0348	0.0258	0.039	0.0413	0.0423
PC(20:3_22:6)	PC	diacyl	3013	M+H	PC(42:9)	(20:3_22:6)	(42:9)	855.578	13.674	C50 H82 N1 O8 P1	2	3	4	66.7	A	0.0262	0.0292	0.029	0.0245	0.0261	0.0245	0.0244	0.0275	0.0273	0.0196	0.021	0.0237	0.0285	0.0232	0.0266	0.0202	0.0211	0.0188	0.0245	0.0257	0.0258
PC(42:9)	PC	diacyl	3014	M+H	PC(42:9)	(42:9)	(42:9)	855.578	14.157	C50 H82 N1 O8 P1	1	3	4	100	C	0.0083	0.0093	0.0097	0.0045	0.0045	0.0091	0.0042	0.0044	0.0057	0.0055	0.006	0.0073	0.0103	0.0067	0.0087	0.006	0.0068	0.004	0.0072	0.007	0.0073
PC(42:8)	PC	diacyl	3018	M+H	PC(42:8)	(42:8)	(42:8)	857.593	14.5	C50 H84 N1 O8 P1	1	3	4	100	C	0.0147	0.0123	0.0127	0.0153	0.0126	0.0137	0.0144	0.0141	0.0159	0.0097	0.0092	0.009	0.0103	0.0117	0.01	0.0097	0.0094	0.0081	0.0117	0.0134	0.0134
PC(20:4_22:4)	PC	diacyl	3019	M+H	PC(42:8)	(20:4_22:4)	(42:8)	857.593	14.972	C50 H84 N1 O8 P1	3	3	4	100	A	0.1065	0.114	0.1171	0.1002	0.1074	0.1101	0.0917	0.0997	0.1081	0.0743	0.0805	0.0862	0.1028	0.1029	0.1032	0.0746	0.0898	0.0752	0.0948	0.1023	0.0983
PC(20:2_22:6)	PC	diacyl	3020	M+H	PC(42:8)	(20:2_22:6)	(42:8)	857.593	15.297	C50 H84 N1 O8 P1	2	3	4	100	A	0.0932	0.0951	0.089	0.0824	0.0808	0.0887	0.0804	0.0862	0.082	0.0784	0.0714	0.0767	0.0899	0.0874	0.0742	0.0795	0.0807	0.072	0.0809	0.0889	0.0808
PC(42:7)	PC	diacyl	3026	M+H	PC(42:7)	(42:7)	(42:7)	859.609	15.749	C50 H86 N1 O8 P1	1	5	6	66.7	C	0.0107	0.0108	0.0115	0.0097	0.0089	0.011	0.0097	0.0101	0.0086	0.0074	0.0071	0.0094	0.0094	0.0095	0.0099	0.0085	0.0082	0.0078	0.0098	0.01	0.0084
PC(20:2_22:5)	PC	diacyl	3027	M+H	PC(42:7)	(20:2_22:5)	(42:7)	859.609	16.036	C50 H86 N1 O8 P1	2	5	6	100	A	0.034	0.0385	0.0386	0.031	0.0268	0.0299	0.0326	0.0367	0.0333	0.0246	0.0284	0.0262	0.031	0.0325	0.0286	0.0274	0.0293	0.0231	0.0262	0.029	0.0369
PC(22:3_20:4)	PC	diacyl	3028	M+H	PC(42:7)	(22:3_20:4)	(42:7)	859.609	16.462	C50 H86 N1 O8 P1	2	5	6	100	A	0.0513	0.0444	0.0457	0.0373	0.0403	0.0423	0.0388	0.0445	0.0442	0.0308	0.0332	0.0349	0.0427	0.0395	0.0396	0.0342	0.0375	0.0293	0.0363	0.0386	0.037
PC(20:1_22:6)	PC	diacyl	3030	M+H	PC(42:7)	(20:1_22:6)	(42:7)	859.609	17.256	C50 H86 N1 O8 P1	2	5	6	100	A	0.042	0.0414	0.0459	0.0391	0.0388	0.0424	0.0383	0.0366	0.0392	0.0306	0.0319	0.0332	0.0379	0.0347	0.0382	0.03	0.0352	0.031	0.0364	0.0387	0.0349
PC(18:2_24:4)	PC	diacyl	3035	M+H	PC(42:6)	(18:2_24:4)	(42:6)	861.625	17.424	C50 H88 N1 O8 P1	2	4	8	100	A	0.0344	0.0362	0.0349	0.0323	0.0297	0.0329	0.0317	0.031	0.0318	0.0273	0.0258	0.0282	0.0362	0.031	0.0345	0.023	0.0272	0.0249	0.0312	0.0314	0.0276
PC(20:2_22:4)	PC	diacyl	3036	M+H	PC(42:6)	(20:2_22:4)	(42:6)	861.625	17.689	C50 H88 N1 O8 P1	2	4	8	100	A	0.0328	0.0331	0.0326	0.033	0.0324	0.0315	0.0269	0.0317	0.0329	0.0223	0.0249	0.0253	0.0248	0.0286	0.0304	0.0236	0.0276	0.0254	0.0283	0.029	0.0301
PC(22:2_20:4)	PC	diacyl	3038	M+H	PC(42:6)	(22:2_20:4)	(42:6)	861.625	18.411	C50 H88 N1 O8 P1	2	4	8	100	A	0.0697	0.0783	0.0794	0.0589	0.0629	0.0742	0.0564	0.0676	0.0559	0.0428	0.0559	0.0622	0.051	0.0574	0.0638	0.0461	0.0545	0.0537	0.0534	0.0591	0.0552
PC(42:6)	PC	diacyl	3039	M+H	PC(42:6)	(42:6)	(42:6)	861.625	18.882	C50 H88 N1 O8 P1	1	4	8	66.7	C	0.0178	0.0233	0.0241	0.0132	0.0105	0.0201	0.0184	0.023	0.0204	0.0133	0.0189	0.0195	0.0177	0.0173	0.0164	0.0153	0.0181	0.0141	0.015	0.0173	0.0153
PC(42:6)	PC	diacyl	3040	M+H	PC(42:6)	(42:6)	(42:6)	861.625	19.72	C50 H88 N1 O8 P1	1	4	8	100	C	0.0129	0.0135	0.0147	0.0124	0.0117	0.0114	0.0114	0.0121	0.0127	0.0091	0.0107	0.011	0.0127	0.0091	0.0121	0.0096	0.0118	0.0097	0.0123	0.0107	0.0117
PC(O-44:12)	PC	alkyl-acyl	3259	M+H	PC(O-44:12)	(O-44:12)	(O-44:12)	863.583	13.121	C52 H82 N1 O7 P1	1	1	0	100	C	0.0072	0.007	0.0077	0.0059	0.0061	0.0056	0.006	0.0065	0.0058	0.0046	0.0049	0.0054	0.0053	0.0058	0.0064	0.0039	0.0047	0.0038	0.0052	0.0061	0.0057
PC(18:1_24:4)	PC	diacyl	3043	M+H	PC(42:5)	(18:1_24:4)	(42:5)	863.64	19.448	C50 H90 N1 O8 P1	2	4	9	100	A	0.0315	0.0386	0.0372	0.0287	0.0302	0.0324	0.0323	0.0336	0.0313	0.0222	0.0229	0.0249	0.028	0.0285	0.0262	0.026	0.0298	0.0239	0.0282	0.0266	0.0285
PC(22:1_20:4)	PC	diacyl	3046	M+H	PC(42:5)	(22:1_20:4)	(42:5)	863.64	20.021	C50 H90 N1 O8 P1	2	4	9	100	A	0.1265	0.1374	0.1358	0.1154	0.1162	0.1284	0.1184	0.1179	0.1345	0.0932	0.0933	0.1029	0.1257	0.1129	0.1147	0.1022	0.1091	0.089	0.1171	0.1197	0.1171
PC(22:0_20:4)	PC	diacyl	2877	M+H	PC(42:4)	(22:0_20:4)	(42:4)	865.656	20.994	C50 H92 N1 O8 P1	2	4	20	100	A	0.0261	0.0289	0.0277	0.0212	0.0239	0.025	0.0158	0.0202	0.0205	0.0183	0.0215	0.0223	0.0198	0.0195	0.0234	0.0194	0.0245	0.0231	0.0224	0.0212	0.0205
PC(24:1_18:2)	PC	diacyl	3260	M+H	PC(42:3)	(24:1_18:2)	(42:3)	867.672	21.042	C50 H94 N1 O8 P1	2	2	6	100	A	0.0307	0.0326	0.0375	0.0253	0.0258	0.0316	0.0249	0.0299	0.0276	0.0206	0.0244	0.0236	0.0229	0.0239	0.0255	0.0257	0.0285	0.0239	0.0269	0.0271	0.028
PC(24:0_18:2)	PC	diacyl	3050	M+H	PC(42:2)	(24:0_18:2)	(42:2)	869.687	21.79	C50 H96 N1 O8 P1	2	2	16	100	A	0.0277	0.0297	0.0287	0.0257	0.0237	0.0235	0.0245	0.0268	0.0235	0.0204	0.0225	0.0228	0.029	0.0219	0.0254	0.0228	0.0226	0.0201	0.0257	0.0243	0.0246
PC(24:0_18:1)	PC	diacyl	3054	M+H	PC(42:1)	(24:0_18:1)	(42:1)	871.703	22.283	C50 H98 N1 O8 P1	2	2	15	100	A	0.0229	0.0243	0.0209	0.0187	0.0164	0.015	0.0169	0.0207	0.02	0.018	0.017	0.0186	0.0198	0.018	0.0196	0.0186	0.0183	0.0151	0.0183	0.0164	0.0182
PC(O-44:7)	PC	alkyl-acyl	3263	M+H	PC(O-44:7)	(O-44:7)	(O-44:7)	873.661	20.493	C52 H92 N1 O7 P1	1	1	0	100	C	0.0197	0.0196	0.0198	0.0156	0.0157	0.016	0.0158	0.0162	0.0171	0.0127	0.0139	0.0143	0.0157	0.0149	0.0157	0.0131	0.0142	0.0115	0.016	0.0162	0.0159
PC(O-24:2_20:4)	PC	alkyl-acyl	3058	M+H	PC(O-44:6)	(O-24:2_20:4)	(O-44:6)	875.677	20.81	C52 H94 N1 O7 P1	2	2	0	100	A	0.0431	0.0439	0.0437	0.0342	0.0418	0.0373	0.0361	0.0414	0.0376	0.0323	0.0311	0.0358	0.0404	0.0352	0.0398	0.0329	0.0378	0.0293	0.0379	0.0337	0.0389
PC(22:6_22:6)	PC	diacyl	3062	M+H	PC(44:12)	(22:6_22:6)	(44:12)	877.562	12.265	C52 H80 N1 O8 P1	2	2	1	100	A	0.0146	0.0158	0.0143	0.0124	0.013	0.0138	0.0116	0.0129	0.0137	0.0103	0.0102	0.011	0.0135	0.0132	0.0137	0.0104	0.0111	0.0091	0.0124	0.013	0.0128
PC(O-24:1_20:4)	PC	alkyl-acyl	3066	M+H	PC(O-44:5)	(O-24:1_20:4)	(O-44:5)	877.692	21.441	C52 H96 N1 O7 P1	2	2	0	100	A	0.0254	0.0263	0.0268	0.0213	0.0188	0.0209	0.0199	0.0246	0.0228	0.018	0.019	0.0211	0.0227	0.0211	0.0209	0.0145	0.0199	0.0183	0.0183	0.0213	0.0206
PC(22:5_22:6)	PC	diacyl	3069	M+H	PC(44:11)	(22:5_22:6)	(44:11)	879.578	12.965	C52 H82 N1 O8 P1	2	2	0	100	A	0.0128	0.013	0.0143	0.0116	0.0118	0.012	0.0116	0.0124	0.0105	0.0092	0.0088	0.0101	0.0125	0.0111	0.0118	0.008	0.0096	0.008	0.0113	0.0117	0.0115
PC(22:4_22:6)	PC	diacyl	3071	M+H	PC(44:10)	(22:4_22:6)	(44:10)	881.593	14.416	C52 H84 N1 O8 P1	2	2	2	100	A	0.0285	0.0272	0.0288	0.025	0.0254	0.03	0.0271	0.0298	0.0296	0.022	0.0229	0.0228	0.0265	0.0269	0.027	0.0198	0.0241	0.0185	0.0258	0.0273	0.0256
PC(O-44:3)	PC	alkyl-acyl	3265	M+H	PC(O-44:3)	(O-44:3)	(O-44:3)	881.724	22.242	C52 H100 N1 O7 P1	1	1	0	100	C	0.0663	0.0738	0.0746	0.057	0.0547	0.0472	0.0736	0.0734	0.0831	0.0552	0.0561	0.0644	0.0872	0.0494	0.0879	0.0397	0.0448	0.0376	0.0513	0.0522	0.0374
PC(44:9)	PC	diacyl	3266	M+H	PC(44:9)	(44:9)	(44:9)	883.609	15.361	C52 H86 N1 O8 P1	1	1	0	100	C	0.0202	0.0222	0.0214	0.0204	0.0188	0.0202	0.0215	0.0215	0.0226	0.0178	0.0174	0.0172	0.0212	0.0211	0.0199	0.018	0.0198	0.0164	0.0188	0.0228	0.0205
PC(44:9)	PC	diacyl	3267	M+H	PC(44:9)	(44:9)	(44:9)	883.609	15.786	C52 H86 N1 O8 P1	1	1	0	100	C	0.0093	0.0101	0.0095	0.0088	0.0077	0.0081	0.0075	0.008	0.0083	0.007	0.0069	0.0082	0.0083	0.0079	0.0086	0.0056	0.0062	0.0057	0.0075	0.0081	0.0076
PC(20:4_24:4)	PC	diacyl	3074	M+H	PC(44:8)	(20:4_24:4)	(44:8)	885.625	17.022	C52 H88 N1 O8 P1	2	2	3	100	A	0.0913	0.0872	0.0906	0.0854	0.091	0.0934	0.0849	0.0874	0.0781	0.0734	0.0694	0.0719	0.0836	0.0807	0.0767	0.0656	0.0754	0.0576	0.078	0.0808	0.0772
PC(44:7)	PC	diacyl	3271	M+H	PC(44:7)	(44:7)	(44:7)	887.64	19.682	C52 H90 N1 O8 P1	1	1	2	100	C	0.0117	0.0114	0.0135	0.011	0.0119	0.0119	0.0107	0.0117	0.0121	0.0089	0.0101	0.0097	0.0098	0.0103	0.0105	0.01	0.0107	0.008	0.0107	0.0114	0.011
PC(44:6)	PC	diacyl	3078	M+H	PC(44:6)	(44:6)	(44:6)	889.656	19.652	C52 H92 N1 O8 P1	1	2	4	66.7	C	0.0115	0.0116	0.0108	0.0104	0.0106	0.0108	0.011	0.0092	0.0109	0.0077	0.0094	0.0082	0.0101	0.0096	0.0103	0.0083	0.0093	0.0078	0.0089	0.0102	0.0098
PC(24:2_20:4)	PC	diacyl	3080	M+H	PC(44:6)	(24:2_20:4)	(44:6)	889.656	20.216	C52 H92 N1 O8 P1	2	2	4	100	A	0.0434	0.047	0.0479	0.0365	0.0394	0.0417	0.0369	0.0454	0.0374	0.0291	0.0339	0.0368	0.0363	0.0329	0.0395	0.0305	0.0398	0.0313	0.0344	0.0358	0.0337
PC(44:6)	PC	diacyl	3081	M+H	PC(44:6)	(44:6)	(44:6)	889.656	20.782	C52 H92 N1 O8 P1	1	2	4	66.7	C	0.0057	0.0054	0.0051	0.0055	0.0057	0.0057	0.0049	0.0069	0.0058	0.0047	0.005	0.0047	0.0066	0.0037	0.0066	0.0049	0.0054	0.0036	0.0064	0.0044	0.0046
PC(24:1_20:4)	PC	diacyl	3083	M+H	PC(44:5)	(24:1_20:4)	(44:5)	891.672	20.936	C52 H94 N1 O8 P1	2	2	2	100	A	0.0435	0.0435	0.047	0.0364	0.0346	0.0368	0.0253	0.0288	0.0247	0.0306	0.031	0.0343	0.0344	0.0321	0.0372	0.0286	0.0327	0.0309	0.0307	0.0365	0.0322
PC(45:11)	PC	diacyl	3272	M+H	PC(45:11)	(45:11)	(45:11)	893.593	12.286	C53 H84 N1 O8 P1	1	1	0	100	C	0.0052	0.0058	0.0053	0.0047	0.0047	0.0046	0.0045	0.0048	0.0049	0.0039	0.0036	0.0041	0.0046	0.0047	0.0047	0.0036	0.0038	0.0031	0.0041	0.0044	0.005
PC(24:0_20:4)	PC	diacyl	3086	M+H	PC(44:4)	(24:0_20:4)	(44:4)	893.687	21.652	C52 H96 N1 O8 P1	2	2	3	100	A	0.0371	0.0376	0.0388	0.032	0.0314	0.0325	0.0323	0.0358	0.0306	0.03	0.0309	0.0298	0.032	0.0311	0.0329	0.0277	0.0331	0.0279	0.0346	0.0323	0.0321
PC(O-45:3)	PC	alkyl-acyl	3273	M+H	PC(O-45:3)	(O-45:3)	(O-45:3)	895.739	22.247	C53 H102 N1 O7 P1	1	1	0	100	C	0.0227	0.025	0.026	0.0266	0.0242	0.0236	0.0252	0.0264	0.0248	0.0294	0.0268	0.0324	0.0465	0.0255	0.0462	0.0203	0.0228	0.0184	0.028	0.0293	0.0191
PC(O-46:8)	PC	alkyl-acyl	3274	M+H	PC(O-46:8)	(O-46:8)	(O-46:8)	899.677	20.629	C54 H94 N1 O7 P1	1	1	0	100	C	0.0081	0.0081	0.0082	0.0062	0.007	0.0072	0.0063	0.0074	0.0073	0.0052	0.0054	0.0061	0.0062	0.0059	0.0064	0.005	0.0065	0.0043	0.0066	0.0062	0.0072
PC(O-46:7)	PC	alkyl-acyl	3297	M+H	PC(O-46:7)	(O-46:7)	(O-46:7)	901.692	21.257	C54 H96 N1 O7 P1	1	1	0	66.7	C	0.0058	0.0061	0.0062	0.0042	0.0046	0.0045	0.0043	0.0051	0.0045	0.0035	0.004	0.0045	0.0042	0.004	0.0045	0.0036	0.0044	0.0034	0.0042	0.0047	0.0047
PC(46:10)	PC	diacyl	3276	M+H	PC(46:10)	(46:10)	(46:10)	909.625	16.511	C54 H88 N1 O8 P1	1	1	0	100	C	0.02	0.0182	0.0214	0.0167	0.0169	0.019	0.0161	0.0191	0.0197	0.014	0.0136	0.0161	0.018	0.0168	0.0164	0.0133	0.0154	0.0124	0.017	0.0176	0.0178
PC(46:8)	PC	diacyl	3277	M+H	PC(46:8)	(46:8)	(46:8)	913.656	19.425	C54 H92 N1 O8 P1	1	1	0	100	C	0.0181	0.0186	0.0202	0.0148	0.0166	0.0171	0.0158	0.018	0.0164	0.0119	0.0124	0.0131	0.0145	0.0131	0.0132	0.0131	0.0146	0.011	0.016	0.0158	0.0147
PC(46:8)	PC	diacyl	3278	M+H	PC(46:8)	(46:8)	(46:8)	913.656	19.924	C54 H92 N1 O8 P1	1	1	0	66.7	C	0.0053	0.0061	0.0065	0.0058	0.0051	0.0062	0.0059	0.0055	0.0064	0.0049	0.0044	0.0051	0.006	0.0056	0.0053	0.0041	0.0045	0.0046	0.0057	0.0053	0.0048
PC(46:7)	PC	diacyl	3279	M+H	PC(46:7)	(46:7)	(46:7)	915.672	20.732	C54 H94 N1 O8 P1	1	1	0	66.7	C	0.0065	0.0067	0.0056	0.005	0.0059	0.0052	0.0058	0.0058	0.0057	0.0044	0.0045	0.0052	0.0057	0.0048	0.0055	0.0046	0.0043	0.0042	0.0047	0.0045	0.0059
PE(17:0)	PE	diacyl	755	M+H	PE(17:0)	(17:0)	(17:0)	481.28	5.983	C22 H44 N1 O8 P1	2	1	0	100	C	0.006	0.0038	0.0054	0.0055	0.0052	0.0066	0.0037	0.0045	0.0042	0.0065	0.0082	0.0092	0.0072	0.0077	0.0102	0.0127	0.0177	0.0115	0.01	0.0095	0.01
PE(19:2)	PE	diacyl	152	M+H	PE(19:2)	(19:2)	(19:2)	505.28	5.49	C24 H44 N1 O8 P1	2	1	0	100	C	0.0102	0.0085	0.0099	0.0091	0.0101	0.0114	0.0062	0.0091	0.0083	0.0126	0.0147	0.0173	0.0154	0.0155	0.0162	0.0201	0.0333	0.0161	0.018	0.0134	0.017
PE(17:1_2:0)	PE	diacyl	154	M+H	PE(19:1)	(17:1_2:0)	(19:1)	507.296	6.191	C24 H46 N1 O8 P1	2	2	0	100	B	0.008	0.007	0.0082	0.0076	0.0078	0.0105	0.0057	0.0073	0.007	0.0106	0.0126	0.0139	0.0115	0.0119	0.0152	0.0204	0.03	0.0189	0.0167	0.0144	0.0146
PE(21:4)	PE	diacyl	155	M+H	PE(21:4)	(21:4)	(21:4)	529.28	5.417	C26 H44 N1 O8 P1	2	1	0	100	C	0.2455	0.2233	0.24	0.1989	0.2097	0.249	0.1411	0.1931	0.1792	0.2789	0.3823	0.3987	0.3258	0.2907	0.3767	0.4195	0.7022	0.1997	0.3907	0.3801	0.3743
PE(23:6)	PE	diacyl	160	M+H	PE(23:6)	(23:6)	(23:6)	553.28	5.311	C28 H44 N1 O8 P1	2	1	0	100	C	0.1981	0.1706	0.1977	0.1482	0.1439	0.1803	0.1027	0.1506	0.132	0.2303	0.284	0.3185	0.2331	0.2234	0.292	0.3052	0.4996	0.129	0.302	0.2737	0.2761
PE(23:5)	PE	diacyl	163	M+H	PE(23:5)	(23:5)	(23:5)	555.296	5.593	C28 H46 N1 O8 P1	2	2	0	100	C	0.0525	0.0421	0.0505	0.0366	0.0379	0.0495	0.0271	0.0374	0.0365	0.0623	0.0777	0.082	0.0621	0.0586	0.074	0.0804	0.1301	0.0344	0.0667	0.0703	0.0734
PE(20:5_3:0)	PE	diacyl	165	M+H	PE(23:5)	(20:5_3:0)	(23:5)	555.296	5.851	C28 H46 N1 O8 P1	2	2	0	100	B	0.0042	0.0036	0.0045	0.0031	0.003	0.0046	0.0026	0.0048	0.0024	0.005	0.0066	0.0077	0.0067	0.0063	0.0066	0.0098	0.0104	0.0035	0.0089	0.0063	0.0069
PE(23:4)	PE	diacyl	166	M+H	PE(23:4)	(23:4)	(23:4)	557.312	6.171	C28 H48 N1 O8 P1	2	1	0	100	C	0.0324	0.0284	0.0332	0.0251	0.0269	0.034	0.0209	0.0306	0.0253	0.0418	0.0505	0.0551	0.0434	0.0417	0.0514	0.0608	0.0964	0.0299	0.054	0.0494	0.052
PE(25:4)	PE	diacyl	167	M-H	PE(25:4)	(25:4)	(25:4)	585.343	7.125	C30 H52 N1 O8 P1	1	1	0	66.7	C	0.0016	0.0016	0.0023	0.0014	0.0019	0.0021	0.0013	0.0015	0.0013	0.0033	0.0049	0.0044	0.0038	0.0032	0.005	0.0035	0.0067	0.0012	0.0035	0.0039	0.0035
PE(16:0_16:1)	PE	diacyl	171	M+H	PE(32:1)	(16:0_16:1)	(32:1)	689.5	15.568	C37 H72 N1 O8 P1	2	1	3	100	A	0.057	0.0576	0.0645	0.0528	0.0525	0.0487	0.0474	0.0538	0.0659	0.0423	0.0481	0.0495	0.0479	0.0473	0.0533	0.049	0.0498	0.0466	0.0542	0.0513	0.0525
PE(16:0_16:0)	PE	diacyl	173	M-H	PE(32:0)	(16:0_16:0)	(32:0)	691.515	17.784	C37 H74 N1 O8 P1	2	1	2	100	A	0.0913	0.095	0.0844	0.0466	0.0448	0.044	0.0515	0.0866	0.0653	0.0658	0.0685	0.074	0.0551	0.0589	0.0667	0.0861	0.0873	0.0876	0.0544	0.0577	0.0487
PE(O-14:1_20:4)	PE	alkyl-acyl	898	M-H	PE(O-34:5)	(O-14:1_20:4)	(O-34:5)	695.489	14.545	C39 H70 N1 O7 P1	1	1	0	66.7	B	0.0239	0.0221	0.0266	0.0226	0.0218	0.0262	0.0236	0.0242	0.0276	0.0185	0.0194	0.0209	0.0218	0.0245	0.0226	0.0184	0.0209	0.0179	0.0221	0.0227	0.021
PE(O-16:1_18:2)	PE	alkyl-acyl	174	M-H	PE(O-34:3)	(O-16:1_18:2)	(O-34:3)	699.52	17.562	C39 H74 N1 O7 P1	1	1	0	100	B	0.3602	0.4133	0.3935	0.3691	0.3548	0.3799	0.3569	0.4009	0.3849	0.3236	0.3465	0.3226	0.3681	0.3509	0.3479	0.3108	0.3379	0.2903	0.3684	0.3441	0.3327
PE(O-18:2_16:0)	PE	alkyl-acyl	176	M-H	PE(O-34:2)	(O-18:2_16:0)	(O-34:2)	701.536	17.838	C39 H76 N1 O7 P1	1	3	0	66.7	B	0.0079	0.0128	0.0104	0.004	0.0116	0.0062	0.0071	0.0085	0.0092	0.0071	0.0113	0.0074	0.0068	0.0085	0.0051	0.0156	0.0072	0.0131	0.0092	0.0102	0.0119
PE(O-16:1_18:0)	PE	alkyl-acyl	178	M+H	PE(O-34:1)	(O-16:1_18:0)	(O-34:1)	703.552	19.688	C39 H78 N1 O7 P1	1	3	0	100	A	0.1692	0.1599	0.1605	0.1236	0.1302	0.1306	0.1348	0.1326	0.13	0.1076	0.1203	0.1333	0.131	0.1352	0.1283	0.1575	0.1498	0.1316	0.1274	0.119	0.1256
PE(O-18:1_16:0)	PE	alkyl-acyl	180	M-H	PE(O-34:1)	(O-18:1_16:0)	(O-34:1)	703.552	20.584	C39 H78 N1 O7 P1	1	3	0	66.7	B	0.0248	0.0238	0.0247	0.0125	0.0128	0.0114	0.0159	0.0249	0.0171	0.0169	0.0198	0.0184	0.0147	0.0152	0.0178	0.0201	0.022	0.0228	0.0156	0.0141	0.0151
PE(O-15:1_20:4)	PE	alkyl-acyl	908	M-H	PE(O-35:5)	(O-15:1_20:4)	(O-35:5)	709.505	15.829	C40 H72 N1 O7 P1	1	1	0	66.7	C	0.0352	0.0424	0.0455	0.034	0.034	0.0373	0.0356	0.0392	0.0356	0.0297	0.0361	0.0343	0.0404	0.0342	0.0338	0.0285	0.0343	0.0269	0.0382	0.0318	0.0388
PE(16:1_18:2)	PE	diacyl	229	M+H	PE(34:3)	(16:1_18:2)	(34:3)	713.5	14.019	C39 H72 N1 O8 P1	2	3	12	100	A	0.0285	0.0322	0.0328	0.0266	0.0301	0.0295	0.0278	0.0318	0.0323	0.0241	0.0265	0.0252	0.033	0.0282	0.0307	0.0259	0.0264	0.0233	0.0284	0.0267	0.0277
PE(16:0_18:3)	PE	diacyl	233	M-H	PE(34:3)	(16:0_18:3)	(34:3)	713.5	14.524	C39 H72 N1 O8 P1	1	3	4	100	B	0.0167	0.0172	0.0172	0.0162	0.0136	0.0122	0.0152	0.0187	0.0212	0.0092	0.0167	0.0137	0.0135	0.013	0.0157	0.0127	0.0126	0.0117	0.014	0.0135	0.0151
PE(16:0_18:2)	PE	diacyl	319	M+H	PE(34:2)	(16:0_18:2)	(34:2)	715.515	16.171	C39 H74 N1 O8 P1	2	2	3	100	A	1.1216	1.2141	1.3114	1.032	1.009	1.1202	1.1085	1.173	1.1821	0.9286	0.9826	1.0792	1.224	1.1664	1.1086	0.9779	1.1883	0.9934	1.173	1.0163	1.1472
PE(16:0_18:1)	PE	diacyl	353	M+H	PE(34:1)	(16:0_18:1)	(34:1)	717.531	18.152	C39 H76 N1 O8 P1	2	1	4	100	A	0.904	0.962	0.9753	0.837	0.8102	0.8227	0.8385	0.968	0.8956	0.8019	0.9166	0.8837	0.9914	0.9486	0.9269	0.8516	0.8987	0.774	0.948	0.9446	0.8856
PE(16:0_18:0)	PE	diacyl	357	M-H	PE(34:0)	(16:0_18:0)	(34:0)	719.547	20.027	C39 H78 N1 O8 P1	1	1	3	100	A	0.0606	0.0584	0.0611	0.0327	0.0268	0.0317	0.0427	0.0547	0.0401	0.0428	0.0469	0.0496	0.037	0.0343	0.0433	0.0512	0.057	0.0554	0.0384	0.0371	0.0366
PE(O-16:1_20:5)	PE	alkyl-acyl / alkenyl-acyl	359	M-H	PE(O-36:6) / PE(P-36:5)	(O-16:1_20:5)	(O-36:6)	721.505	15.457	C41 H72 N1 O7 P1	1	2	0	100	B	0.2537	0.2864	0.3032	0.2191	0.2534	0.2553	0.2363	0.2639	0.2695	0.2058	0.2403	0.231	0.2372	0.2226	0.2399	0.1948	0.2284	0.1983	0.2751	0.2277	0.2301
PE(P-18:2_18:2)	PE	alkenyl-acyl	813	M+H	PE(P-36:4)	(P-18:2_18:2)	(P-36:4)	723.52	15.866	C41 H74 N1 O7 P1	1	2	0	66.7	B	0.0426	0.0549	0.0512	0.0461	0.0504	0.0489	0.0547	0.0541	0.0497	0.037	0.0452	0.0479	0.0604	0.0478	0.0499	0.0382	0.0434	0.034	0.0502	0.0441	0.0476
PE(P-16:0_20:4)	PE	alkenyl-acyl	814	M+H	PE(P-36:4)	(P-16:0_20:4)	(P-36:4)	723.52	17.161	C41 H74 N1 O7 P1	1	2	0	100	B	7.6059	8.3261	8.4937	8.0952	8.1263	7.7104	7.873	8.7466	8.4311	6.7746	7.0963	6.9454	7.9482	7.567	7.2074	6.7763	7.108	5.6849	7.8392	7.1765	7.2142
PE(P-18:1_18:2)	PE	alkenyl-acyl	816	M+H	PE(P-36:3)	(P-18:1_18:2)	(P-36:3)	725.536	17.621	C41 H76 N1 O7 P1	1	2	0	100	B	0.4872	0.5228	0.546	0.4737	0.5135	0.5092	0.444	0.5481	0.5372	0.4095	0.4382	0.4319	0.4698	0.4693	0.4703	0.3951	0.4309	0.3639	0.4495	0.4296	0.4614
PE(P-16:0_20:3)	PE	alkenyl-acyl	817	M+H	PE(P-36:3)	(P-16:0_20:3)	(P-36:3)	725.536	18.296	C41 H76 N1 O7 P1	1	2	0	100	B	0.0827	0.0917	0.0693	0.0865	0.0716	0.0848	0.0726	0.0966	0.0853	0.0827	0.0886	0.087	0.0743	0.0799	0.0881	0.064	0.0746	0.0563	0.0827	0.0885	0.0718
PE(O-18:1_18:2)	PE	alkyl-acyl	371	M-H	PE(O-36:3)	(O-18:1_18:2)	(O-36:3)	727.552	19.908	C41 H78 N1 O7 P1	1	3	0	100	B	0.1679	0.1763	0.2045	0.1528	0.1761	0.1704	0.1727	0.1962	0.1732	0.1474	0.1617	0.1519	0.1702	0.1526	0.1535	0.1574	0.1659	0.1318	0.1704	0.1503	0.1407
PE(O-18:0_18:2)	PE	alkyl-acyl	375	M+H	PE(O-36:2)	(O-18:0_18:2)	(O-36:2)	729.567	20.124	C41 H80 N1 O7 P1	1	2	0	100	A	0.0572	0.0668	0.0606	0.0558	0.0499	0.0607	0.0549	0.0694	0.0652	0.0511	0.0505	0.0521	0.0578	0.0555	0.0509	0.0537	0.0557	0.0462	0.0568	0.0553	0.0572
PE(P-18:0_18:1)	PE	alkenyl-acyl	831	M+H	PE(P-36:1)	(P-18:0_18:1)	(P-36:1)	729.567	20.647	C41 H80 N1 O7 P1	1	2	0	66.7	B	0.14	0.1506	0.167	0.1191	0.1138	0.1194	0.1231	0.1536	0.1339	0.1128	0.1168	0.117	0.1216	0.1101	0.1122	0.1169	0.1292	0.1117	0.1299	0.1129	0.1016
PE(O-18:0_18:1)	PE	alkyl-acyl	1047	M+H	PE(O-36:1)	(O-18:0_18:1)	(O-36:1)	731.583	20.777	C41 H82 N1 O7 P1	2	1	0	66.7	B	0.0388	0.0444	0.0495	0.0361	0.0321	0.0357	0.0328	0.0451	0.0369	0.0308	0.0363	0.0337	0.0346	0.0333	0.0391	0.0383	0.0402	0.0378	0.0348	0.033	0.0376
PE(16:1_20:4)	PE	diacyl	380	M+H	PE(36:5)	(16:1_20:4)	(36:5)	737.5	13.707	C41 H72 N1 O8 P1	2	3	2	100	A	0.0678	0.0655	0.0698	0.0641	0.059	0.0666	0.0609	0.0654	0.0674	0.0476	0.0557	0.0542	0.063	0.0642	0.0618	0.051	0.0588	0.0437	0.0598	0.0581	0.0676
PE(16:0_20:5)	PE	diacyl	382	M+H	PE(36:5)	(16:0_20:5)	(36:5)	737.5	14.273	C41 H72 N1 O8 P1	2	3	2	100	A	0.0707	0.0765	0.0823	0.0728	0.0627	0.0772	0.0737	0.0719	0.0751	0.0557	0.0654	0.0638	0.0718	0.0844	0.0675	0.0575	0.064	0.0493	0.076	0.0643	0.0682
PE(P-17:0_20:4)	PE	alkenyl-acyl	864	M+H	PE(P-37:4)	(P-17:0_20:4)	(P-37:4)	737.536	18.119	C42 H76 N1 O7 P1	1	1	0	100	B	0.1001	0.1159	0.1176	0.107	0.1084	0.1105	0.0939	0.1127	0.1044	0.0998	0.1037	0.1022	0.1238	0.1179	0.1132	0.0778	0.0859	0.0743	0.1085	0.107	0.1011
PE(O-17:1_20:4)	PE	alkyl-acyl	385	M-H	PE(O-37:5)	(O-17:1_20:4)	(O-37:5)	737.536	18.518	C42 H76 N1 O7 P1	1	1	0	100	B	0.2314	0.2568	0.2871	0.2504	0.244	0.2481	0.2123	0.2647	0.2489	0.1743	0.2158	0.2205	0.2483	0.2125	0.2292	0.1867	0.2198	0.181	0.2358	0.2209	0.2097
PE(16:0_20:4)	PE	diacyl	392	M+H	PE(36:4)	(16:0_20:4)	(36:4)	739.515	15.853	C41 H74 N1 O8 P1	2	2	2	100	A	3.0194	3.1732	3.3572	3.0028	2.9885	3.0724	3.0271	3.1773	3.2518	2.4983	2.7619	2.9362	3.1789	2.9228	2.917	2.5306	2.7307	2.2002	3.102	2.7628	2.8418
PE(18:1_18:2)	PE	diacyl	394	M+H	PE(36:3)	(18:1_18:2)	(36:3)	741.531	16.463	C41 H76 N1 O8 P1	2	3	2	100	A	0.6427	0.6156	0.6346	0.588	0.6035	0.5661	0.5665	0.6529	0.6395	0.4821	0.5399	0.5267	0.6386	0.5829	0.5587	0.5591	0.5824	0.5014	0.5883	0.5876	0.5746
PE(18:0_18:2)	PE	diacyl	400	M+H	PE(36:2)	(18:0_18:2)	(36:2)	743.547	18.921	C41 H78 N1 O8 P1	2	2	3	100	A	2.2311	2.3253	2.595	2.0425	2.0288	2.247	2.1577	2.6106	2.3806	1.8825	1.9672	1.9652	2.1377	2.1512	2.2687	2.0926	2.2257	1.9433	2.1836	2.1092	2.3281
PE(18:0_18:1)	PE	diacyl	411	M+H	PE(36:1)	(18:0_18:1)	(36:1)	745.562	20.157	C41 H80 N1 O8 P1	2	1	5	100	A	0.8503	0.9376	0.9081	0.6809	0.6563	0.7101	0.7441	0.8875	0.8247	0.693	0.6955	0.7056	0.7748	0.6935	0.7696	0.7643	0.8491	0.7566	0.7325	0.71	0.7165
PE(P-18:2_20:4)	PE	alkenyl-acyl	866	M+H	PE(P-38:6)	(P-18:2_20:4)	(P-38:6)	747.52	15.472	C43 H74 N1 O7 P1	1	2	0	100	B	0.4105	0.4515	0.4055	0.4467	0.4709	0.4486	0.4207	0.4674	0.4153	0.4527	0.502	0.4039	0.4375	0.5653	0.4944	0.3548	0.4097	0.3311	0.4852	0.4142	0.4078
PE(O-16:1_22:6)	PE	alkyl-acyl	414	M-H	PE(O-38:7)	(O-16:1_22:6)	(O-38:7)	747.52	16.521	C43 H74 N1 O7 P1	1	3	0	100	B	8.7165	8.9412	9.2391	7.7092	8.543	8.0269	8.1008	9.1825	9.4474	6.8069	7.2728	7.2687	8.4171	7.8028	7.8756	6.4828	7.0541	5.7378	8.0772	7.5914	7.7855
PE(O-16:1_22:5)	PE	alkyl-acyl	423	M-H	PE(O-38:6)	(O-16:1_22:5)	(O-38:6)	749.536	17.349	C43 H76 N1 O7 P1	1	3	0	100	B	3.5101	3.8873	3.7992	3.6123	3.5265	3.718	3.6829	3.8052	3.8301	3.1185	3.2167	3.2077	3.5661	3.3917	3.3819	2.8801	3.1824	2.5006	3.5485	3.1468	3.1881
PE(O-16:1_22:5)	PE	alkyl-acyl	425	M-H	PE(O-38:6)	(O-16:1_22:5)	(O-38:6)	749.536	18.23	C43 H76 N1 O7 P1	1	3	0	100	B	0.2569	0.3415	0.3272	0.329	0.3164	0.3429	0.3009	0.366	0.3761	0.2877	0.3479	0.3209	0.3625	0.3585	0.311	0.3226	0.2892	0.2229	0.2937	0.2895	0.3195
PE(O-18:1_20:4)	PE	alkyl-acyl	434	M-H	PE(O-38:5)	(O-18:1_20:4)	(O-38:5)	751.552	17.765	C43 H78 N1 O7 P1	2	5	0	100	B	0.6762	0.7488	0.7244	0.6527	0.6578	0.7184	0.6391	0.717	0.7687	0.5218	0.6305	0.6018	0.6786	0.6772	0.6362	0.5824	0.6551	0.5174	0.6483	0.6407	0.6221
PE(O-16:1_22:4) / PE(P-16:0_22:4)	PE	alkyl-acyl / alkenyl-acyl	437	M-H	PE(O-38:5)	(O-16:1_22:4)	(O-38:5)	751.552	19.079	C43 H78 N1 O7 P1	1	5	0	100	B	1.6489	1.8425	1.879	1.5913	1.6361	1.7188	1.739	1.8288	1.7683	1.4545	1.5906	1.5289	1.8285	1.6996	1.6596	1.3401	1.4539	1.2588	1.7421	1.5521	1.543
PE(O-18:1_20:4) / PE(P-18:0_20:4)	PE	alkyl-acyl / alkenyl-acyl	440	M-H	PE(O-38:5)	(O-18:1_20:4)	(O-38:5)	751.552	19.64	C43 H78 N1 O7 P1	1	5	0	100	B	3.9512	4.3959	4.4306	3.7746	3.6031	3.7506	3.8373	3.9921	4.0807	3.0399	3.3383	3.3566	3.7868	3.492	3.4924	3.217	3.6842	2.9219	3.9012	3.1581	3.4825
PE(O-16:0_22:4)	PE	alkyl-acyl	445	M+H	PE(O-38:4)	(O-16:0_22:4)	(O-38:4)	753.567	19.487	C43 H80 N1 O7 P1	2	2	0	100	A	0.3078	0.3429	0.337	0.2909	0.2986	0.3023	0.2932	0.3374	0.3274	0.2518	0.2798	0.2734	0.3015	0.2781	0.2732	0.27	0.2775	0.2156	0.3191	0.2713	0.2893
PE(O-18:0_20:4)	PE	alkyl-acyl	447	M+H	PE(O-38:4)	(O-18:0_20:4)	(O-38:4)	753.567	19.94	C43 H80 N1 O7 P1	2	2	0	100	A	0.7664	0.905	0.8834	0.801	0.7245	0.782	0.8291	0.8621	0.8983	0.6505	0.703	0.7354	0.7793	0.7754	0.7398	0.7064	0.779	0.6018	0.801	0.7519	0.7414
PE(O-20:1_18:2)	PE	alkyl-acyl	450	M-H	PE(O-38:3)	(O-20:1_18:2)	(O-38:3)	755.583	20.834	C43 H82 N1 O7 P1	1	2	0	100	B	0.0595	0.0658	0.0633	0.0502	0.0456	0.048	0.0503	0.0614	0.0594	0.0441	0.0486	0.0505	0.0517	0.0461	0.0481	0.047	0.0484	0.0408	0.0469	0.0494	0.0469
PE(19:0_18:2)	PE	diacyl	451	M-H	PE(37:2)	(19:0_18:2)	(37:2)	757.562	19.886	C42 H80 N1 O8 P1	1	1	2	100	B	0.0247	0.0323	0.0144	0.0189	0.0196	0.0164	0.0202	0.0272	0.0175	0.0133	0.0136	0.0239	0.0323	0.0202	0.0211	0.0182	0.0208	0.0225	0.0266	0.022	0.0161
PE(O-20:0_18:2)	PE	alkyl-acyl	452	M-H	PE(O-38:2)	(O-20:0_18:2)	(O-38:2)	757.599	20.96	C43 H84 N1 O7 P1	1	2	0	66.7	B	0.0226	0.0224	0.0264	0.0182	0.0163	0.0217	0.0221	0.0239	0.0166	0.0199	0.0224	0.0205	0.0178	0.0184	0.0233	0.0222	0.0192	0.0169	0.0205	0.0187	0.0212
PE(O-20:1_18:1)	PE	alkyl-acyl	453	M-H	PE(O-38:2)	(O-20:1_18:1)	(O-38:2)	757.599	21.274	C43 H84 N1 O7 P1	1	2	0	66.7	B	0.0224	0.0251	0.0238	0.0154	0.0158	0.0172	0.02	0.0251	0.0194	0.0176	0.019	0.0188	0.0194	0.0176	0.0188	0.0186	0.0205	0.0192	0.0177	0.0169	0.0173
PE(O-17:2_22:6)	PE	alkyl-acyl	456	M-H	PE(O-39:8)	(O-17:2_22:6)	(O-39:8)	759.52	15.455	C44 H74 N1 O7 P1	1	1	0	100	B	0.01	0.0123	0.0116	0.0121	0.0122	0.0092	0.0133	0.0175	0.0098	0.0079	0.0117	0.0117	0.0126	0.0099	0.0127	0.01	0.0134	0.0116	0.0101	0.0096	0.0119
PE(18:2_20:5)	PE	diacyl	460	M-H	PE(38:7)	(18:2_20:5)	(38:7)	761.5	12.805	C43 H72 N1 O8 P1	1	3	2	100	B	0.0191	0.0219	0.0209	0.0162	0.019	0.0204	0.0173	0.0201	0.0195	0.0155	0.0154	0.0162	0.0169	0.0193	0.0201	0.0142	0.0179	0.0144	0.0181	0.0147	0.0182
PE(16:1_22:6)	PE	diacyl	461	M+H	PE(38:7)	(16:1_22:6)	(38:7)	761.5	13.217	C43 H72 N1 O8 P1	2	3	2	100	A	0.048	0.0651	0.0497	0.0575	0.0498	0.0504	0.0554	0.0552	0.0584	0.0425	0.0466	0.0393	0.0628	0.053	0.0575	0.046	0.0485	0.0454	0.0565	0.0563	0.0483
PE(16:1_22:6)	PE	diacyl	462	M+H	PE(38:7)	(16:1_22:6)	(38:7)	761.5	14.513	C43 H72 N1 O8 P1	2	3	2	100	A	0.0244	0.0179	0.0218	0.0156	0.0149	0.0194	0.014	0.0133	0.0157	0.0092	0.0101	0.0092	0.0093	0.0087	0.0094	0.0194	0.016	0.0154	0.0182	0.0182	0.0192
PE(18:2_20:4)	PE	diacyl	468	M+H	PE(38:6)	(18:2_20:4)	(38:6)	763.515	14.257	C43 H74 N1 O8 P1	2	3	2	100	A	0.2881	0.3194	0.3258	0.2965	0.2842	0.31	0.3053	0.3288	0.3199	0.2316	0.2634	0.2645	0.2991	0.3044	0.2806	0.2397	0.2684	0.2057	0.3071	0.2703	0.2781
PE(16:0_22:6)	PE	diacyl	470	M+H	PE(38:6)	(16:0_22:6)	(38:6)	763.515	15.27	C43 H74 N1 O8 P1	2	3	2	100	A	2.5529	2.7212	2.7229	2.5764	2.583	2.7842	2.6044	2.707	2.7958	2.6061	2.5682	2.5949	2.4732	2.5596	2.3912	2.3021	2.6041	2.0929	2.7578	2.5201	2.4739
PE(18:1_20:4)	PE	diacyl	483	M+H	PE(38:5)	(18:1_20:4)	(38:5)	765.531	16.128	C43 H76 N1 O8 P1	2	5	2	100	A	2.3185	2.4383	2.7347	2.3029	2.3022	2.3814	2.2748	2.397	2.4257	1.8459	2.1557	2.2209	2.4344	2.3626	2.2068	1.8653	2.1587	1.7398	2.3926	2.1055	2.288
PE(18:0_20:5)	PE	diacyl	486	M+H	PE(38:5)	(18:0_20:5)	(38:5)	765.531	16.866	C43 H76 N1 O8 P1	2	5	2	100	A	0.3409	0.4053	0.4132	0.3492	0.3703	0.3187	0.367	0.4005	0.3349	0.282	0.3338	0.3356	0.3389	0.356	0.3215	0.3026	0.3079	0.2674	0.3007	0.3016	0.2992
PE(20:4_18:1)	PE	diacyl	490	M+H	PE(38:5)	(20:4_18:1)	(38:5)	765.531	18.896	C43 H76 N1 O8 P1	1	5	2	100	B	0.0743	0.0655	0.0782	0.0772	0.0715	0.0796	0.0708	0.0704	0.0739	0.072	0.0774	0.0726	0.0723	0.077	0.0653	0.0736	0.0775	0.0769	0.0797	0.0662	0.0643
PE(O-17:1_22:4)	PE	alkyl-acyl	493	M-H	PE(O-39:5)	(O-17:1_22:4)	(O-39:5)	765.567	19.987	C44 H80 N1 O7 P1	1	2	0	100	B	0.0555	0.0519	0.0439	0.0456	0.0435	0.0529	0.0468	0.0443	0.0484	0.0354	0.0438	0.0415	0.0349	0.0304	0.0415	0.0376	0.0412	0.029	0.053	0.0396	0.0421
PE(O-19:1_20:4)	PE	alkyl-acyl	494	M-H	PE(O-39:5)	(O-19:1_20:4)	(O-39:5)	765.567	20.316	C44 H80 N1 O7 P1	1	2	0	100	B	0.0336	0.0476	0.0411	0.0365	0.0349	0.0366	0.0351	0.0399	0.0343	0.0284	0.0379	0.0329	0.0442	0.0372	0.039	0.0285	0.0377	0.027	0.0397	0.0368	0.0284
PE(16:0_22:4)	PE	diacyl	502	M+H	PE(38:4)	(16:0_22:4)	(38:4)	767.547	17.763	C43 H78 N1 O8 P1	2	4	2	100	A	0.3264	0.3303	0.3234	0.3425	0.3717	0.331	0.2836	0.3669	0.3629	0.2464	0.2842	0.2738	0.2844	0.3233	0.3378	0.2896	0.3109	0.2746	0.3612	0.3277	0.3287
PE(18:0_20:4)	PE	diacyl	506	M+H	PE(38:4)	(18:0_20:4)	(38:4)	767.547	18.554	C43 H78 N1 O8 P1	2	4	3	100	A	12.6624	13.8029	14.5309	12.4271	12.4004	12.8935	11.9838	14.1585	12.666	10.3174	11.4406	12.0685	12.2038	12.1581	12.1911	9.6318	11.729	9.9083	12.5509	11.5039	11.6264
PE(O-19:0_20:4)	PE	alkyl-acyl	917	M-H	PE(O-39:4)	(O-19:0_20:4)	(O-39:4)	767.583	20.471	C44 H82 N1 O7 P1	1	1	0	66.7	B	0.0216	0.0254	0.0187	0.0248	0.0134	0.0159	0.0225	0.0231	0.0291	0.0162	0.0262	0.0161	0.0258	0.0216	0.0231	0.0213	0.0242	0.022	0.0238	0.0224	0.0213
PE(18:0_20:3)	PE	diacyl	522	M+H	PE(38:3)	(18:0_20:3)	(38:3)	769.562	19.531	C43 H80 N1 O8 P1	2	2	2	100	A	0.596	0.6373	0.657	0.5252	0.539	0.5616	0.5609	0.6255	0.5803	0.4642	0.4885	0.5009	0.5476	0.5259	0.5454	0.5092	0.5488	0.4459	0.5803	0.5139	0.5472
PE(P-18:2_22:6)	PE	alkenyl-acyl	876	M+H	PE(P-40:8)	(P-18:2_22:6)	(P-40:8)	771.52	14.877	C45 H74 N1 O7 P1	1	1	0	100	B	0.4158	0.4357	0.4478	0.4278	0.4148	0.4701	0.363	0.4497	0.501	0.3356	0.365	0.3567	0.4169	0.4071	0.3699	0.2981	0.3573	0.2634	0.4012	0.3691	0.3766
PE(18:0_20:2)	PE	diacyl	533	M+H	PE(38:2)	(18:0_20:2)	(38:2)	771.578	20.316	C43 H82 N1 O8 P1	2	1	3	100	A	0.1367	0.1459	0.1505	0.1165	0.1191	0.119	0.1267	0.1491	0.1382	0.1153	0.1263	0.1224	0.1248	0.117	0.1248	0.1155	0.1265	0.1144	0.124	0.1178	0.1182
PE(O-18:3_22:5)	PE	alkyl-acyl	536	M-H	PE(O-40:8)	(O-18:3_22:5)	(O-40:8)	773.536	15.662	C45 H76 N1 O7 P1	1	2	0	100	B	0.0895	0.0988	0.1094	0.0898	0.0892	0.1011	0.0885	0.096	0.0921	0.0745	0.0869	0.0847	0.0913	0.0854	0.0878	0.0647	0.078	0.0597	0.087	0.0824	0.084
PE(18:0_20:1)	PE	diacyl	544	M-H	PE(38:1)	(18:0_20:1)	(38:1)	773.593	20.928	C43 H84 N1 O8 P1	1	1	2	100	A	0.0406	0.0418	0.0434	0.0302	0.0284	0.031	0.0339	0.0439	0.0396	0.0278	0.0327	0.0341	0.0315	0.0288	0.0355	0.0313	0.0422	0.0326	0.0369	0.0323	0.0305
PE(O-18:1_22:6)	PE	alkyl-acyl	547	M-H	PE(O-40:7)	(O-18:1_22:6)	(O-40:7)	775.552	17.169	C45 H78 N1 O7 P1	1	5	0	66.7	B	0.2342	0.257	0.2758	0.2664	0.2426	0.2487	0.2279	0.2739	0.2623	0.2136	0.2355	0.2857	0.2291	0.2385	0.2264	0.2121	0.2207	0.1398	0.2364	0.2053	0.2199
PE(O-18:1_22:6)	PE	alkyl-acyl	554	M-H	PE(O-40:7)	(O-18:1_22:6)	(O-40:7)	775.552	19.241	C45 H78 N1 O7 P1	1	5	0	100	B	2.7343	2.9503	3.0001	2.6009	2.5988	2.9214	2.7755	2.9538	2.9646	2.2434	2.5345	2.5135	2.8495	2.5505	2.6487	2.0328	2.3585	1.9297	2.6886	2.5197	2.6559
PE(17:0_22:6)	PE	diacyl	561	M+H	PE(39:6)	(17:0_22:6)	(39:6)	777.531	16.597	C44 H76 N1 O8 P1	2	1	2	100	A	0.1135	0.1277	0.1254	0.1008	0.1063	0.1128	0.1075	0.1179	0.1112	0.0843	0.0977	0.1009	0.1066	0.1025	0.1052	0.0818	0.0933	0.0717	0.1053	0.1016	0.1054
PE(P-18:0_22:5)	PE	alkenyl-acyl	886	M+H	PE(P-40:5)	(P-18:0_22:5)	(P-40:5)	777.567	19.791	C45 H80 N1 O7 P1	1	2	0	100	B	0.8497	0.9655	0.9227	0.7733	0.769	0.8175	0.8411	0.9738	0.8422	0.7438	0.7303	0.8054	0.8197	0.8238	0.8171	0.7334	0.7083	0.5559	0.9185	0.8146	0.7072
PE(O-18:0_22:5)	PE	alkyl-acyl	576	M-H	PE(O-40:5)	(O-18:0_22:5)	(O-40:5)	779.583	19.533	C45 H82 N1 O7 P1	1	3	0	100	B	0.1376	0.1586	0.1472	0.1303	0.1362	0.1492	0.1264	0.1306	0.1415	0.0881	0.1078	0.1181	0.1201	0.1301	0.1153	0.1226	0.1314	0.0998	0.128	0.1252	0.1323
PE(O-18:0_22:5)	PE	alkyl-acyl	577	M-H	PE(O-40:5)	(O-18:0_22:5)	(O-40:5)	779.583	19.845	C45 H82 N1 O7 P1	1	3	0	66.7	B	0.0287	0.0398	0.0356	0.032	0.0414	0.04	0.0289	0.032	0.0282	0.021	0.0194	0.0294	0.0412	0.0311	0.0307	0.0264	0.0271	0.0172	0.0316	0.022	0.0323
PE(O-18:0_22:5)	PE	alkyl-acyl	579	M+H	PE(O-40:5)	(O-18:0_22:5)	(O-40:5)	779.583	20.014	C45 H82 N1 O7 P1	1	3	0	100	A	0.3058	0.3668	0.3539	0.3102	0.3188	0.3028	0.312	0.3449	0.3683	0.2414	0.2856	0.2938	0.3355	0.2987	0.3036	0.2632	0.2901	0.2106	0.3092	0.2911	0.3022
PE(O-20:1_20:4)	PE	alkyl-acyl	580	M-H	PE(O-40:5)	(O-20:1_20:4)	(O-40:5)	779.583	20.248	C45 H82 N1 O7 P1	1	3	0	66.7	B	0.0961	0.1054	0.1038	0.1046	0.0839	0.0924	0.0959	0.0918	0.1067	0.0796	0.086	0.083	0.0926	0.1017	0.0986	0.0836	0.0792	0.0614	0.0912	0.0917	0.0825
PE(P-18:0_22:4)	PE	alkenyl-acyl	887	M+H	PE(P-40:4)	(P-18:0_22:4)	(P-40:4)	779.583	20.484	C45 H82 N1 O7 P1	1	2	0	100	B	0.4642	0.5275	0.5176	0.3892	0.4162	0.436	0.4271	0.4544	0.4767	0.3228	0.383	0.3717	0.4186	0.3976	0.3797	0.3447	0.3944	0.3392	0.4279	0.4265	0.4061
PE(P-20:0_20:4)	PE	alkenyl-acyl	888	M+H	PE(P-40:4)	(P-20:0_20:4)	(P-40:4)	779.583	20.722	C45 H82 N1 O7 P1	1	2	0	66.7	B	0.4416	0.5186	0.518	0.3866	0.4122	0.4168	0.4342	0.4989	0.4356	0.3411	0.406	0.3958	0.4198	0.4088	0.4028	0.3519	0.3958	0.3237	0.4233	0.3601	0.3847
PE(19:0_20:4)	PE	diacyl	588	M+H	PE(39:4)	(19:0_20:4)	(39:4)	781.562	19.695	C44 H80 N1 O8 P1	2	2	2	100	A	0.0928	0.0946	0.1038	0.0829	0.0758	0.0815	0.0774	0.0877	0.0938	0.069	0.0786	0.0698	0.0898	0.0735	0.08	0.0617	0.0873	0.0653	0.0872	0.0784	0.0915
PE(O-18:0_22:4)	PE	alkyl-acyl	592	M+H	PE(O-40:4)	(O-18:0_22:4)	(O-40:4)	781.599	20.631	C45 H84 N1 O7 P1	2	2	0	66.7	A	0.1843	0.19	0.204	0.1626	0.1528	0.1559	0.1568	0.1924	0.1717	0.1327	0.1476	0.1684	0.1699	0.1524	0.1622	0.1509	0.1639	0.1266	0.1626	0.1377	0.161
PE(O-20:0_20:4)	PE	alkyl-acyl	593	M-H	PE(O-40:4)	(O-20:0_20:4)	(O-40:4)	781.599	20.853	C45 H84 N1 O7 P1	1	2	0	100	B	0.1782	0.1888	0.2065	0.152	0.1628	0.1796	0.1789	0.2096	0.1983	0.1526	0.1734	0.1665	0.1783	0.1725	0.1662	0.1431	0.1572	0.1359	0.1758	0.1737	0.1785
PE(18:2_22:6)	PE	diacyl	595	M+H	PE(40:8)	(18:2_22:6)	(40:8)	787.515	13.735	C45 H74 N1 O8 P1	2	1	2	100	A	0.331	0.3659	0.3971	0.3341	0.3424	0.366	0.3159	0.3598	0.393	0.2772	0.3139	0.3063	0.38	0.3651	0.3241	0.2617	0.3008	0.2384	0.3416	0.3266	0.3138
PE(18:1_22:6)	PE	diacyl	603	M+H	PE(40:7)	(18:1_22:6)	(40:7)	789.531	15.565	C45 H76 N1 O8 P1	2	3	2	100	A	1.5706	1.6527	1.7632	1.4386	1.5257	1.5886	1.3887	1.5009	1.5407	1.2683	1.3992	1.3901	1.5099	1.4789	1.3743	1.1286	1.4066	1.1098	1.5026	1.3275	1.3562
PE(20:2_20:4)	PE	diacyl	616	M-H	PE(40:6)	(20:2_20:4)	(40:6)	791.547	16.633	C45 H78 N1 O8 P1	1	4	2	100	A	0.1701	0.174	0.1792	0.1321	0.1445	0.1541	0.161	0.1598	0.1845	0.1178	0.142	0.1261	0.1743	0.1543	0.1526	0.1311	0.1271	0.0972	0.1547	0.1495	0.1548
PE(18:0_22:6)	PE	diacyl	618	M-H	PE(40:6)	(18:0_22:6)	(40:6)	791.547	17.954	C45 H78 N1 O8 P1	2	4	2	100	A	4.3475	4.851	5.3322	4.5388	4.7106	4.9668	4.6125	4.8827	4.9269	3.8093	4.2985	4.2442	4.4255	4.7545	4.5862	3.806	4.0059	3.4009	4.5358	4.2368	4.2064
PE(18:0_22:5)	PE	diacyl	625	M+H	PE(40:5)	(18:0_22:5)	(40:5)	793.562	18.756	C45 H80 N1 O8 P1	2	2	0	100	A	1.4064	1.4852	1.6675	1.4114	1.428	1.504	1.4298	1.6345	1.5454	1.2233	1.3284	1.2954	1.4647	1.4166	1.4446	1.2003	1.3187	1.0331	1.4342	1.351	1.35
PE(18:0_22:5)	PE	diacyl	629	M+H	PE(40:5)	(18:0_22:5)	(40:5)	793.562	19.541	C45 H80 N1 O8 P1	2	2	0	100	A	0.1868	0.2152	0.2156	0.1627	0.2164	0.2351	0.1866	0.2286	0.219	0.1675	0.1609	0.1666	0.1909	0.1721	0.1877	0.1733	0.1857	0.1329	0.2101	0.1776	0.1826
PE(18:0_22:4)	PE	diacyl	634	M+H	PE(40:4)	(18:0_22:4)	(40:4)	795.578	19.964	C45 H82 N1 O8 P1	2	3	2	100	A	1.5151	1.7106	1.6058	1.3845	1.3073	1.4974	1.4158	1.5565	1.5955	1.181	1.2941	1.4165	1.4879	1.4039	1.4436	1.2891	1.3963	1.1393	1.463	1.3873	1.335
PE(O-20:4_22:6)	PE	alkyl-acyl	646	M-H	PE(O-42:10)	(O-20:4_22:6)	(O-42:10)	797.536	15.446	C47 H76 N1 O7 P1	1	1	0	100	B	0.022	0.0245	0.0271	0.026	0.0271	0.0256	0.027	0.029	0.0273	0.0165	0.021	0.0195	0.025	0.0218	0.0217	0.0184	0.0209	0.012	0.02	0.0155	0.019
PE(22:0_18:1)	PE	diacyl	669	M-H	PE(40:1)	(22:0_18:1)	(40:1)	801.625	21.538	C45 H88 N1 O8 P1	1	1	7	100	B	0.0111	0.0122	0.0131	0.0075	0.0078	0.0099	0.0069	0.0134	0.0103	0.0069	0.0098	0.0106	0.0083	0.0072	0.0085	0.0097	0.0095	0.0117	0.0105	0.0102	0.0093
PE(O-24:6_18:1)	PE	alkyl-acyl	673	M-H	PE(O-42:7)	(O-24:6_18:1)	(O-42:7)	803.583	20.166	C47 H82 N1 O7 P1	1	4	0	100	B	0.0169	0.022	0.014	0.0158	0.0166	0.0161	0.0163	0.0138	0.0181	0.0145	0.0153	0.0123	0.0182	0.0169	0.0168	0.0135	0.0167	0.0116	0.0148	0.0152	0.0152
PE(19:0_22:6)	PE	diacyl	676	M+H	PE(41:6)	(19:0_22:6)	(41:6)	805.562	19.277	C46 H80 N1 O8 P1	2	1	2	100	A	0.0434	0.0525	0.0445	0.0469	0.0356	0.0513	0.0387	0.0504	0.0473	0.0397	0.0412	0.0473	0.0588	0.0553	0.047	0.0393	0.0422	0.0355	0.0517	0.0453	0.0351
PE(O-24:5_18:1)	PE	alkyl-acyl	681	M-H	PE(O-42:6)	(O-24:5_18:1)	(O-42:6)	805.599	20.346	C47 H84 N1 O7 P1	1	4	0	66.7	B	0.0273	0.0363	0.0306	0.0243	0.0227	0.0253	0.0296	0.0284	0.0296	0.0265	0.0297	0.0354	0.033	0.0227	0.0344	0.0214	0.031	0.0274	0.0332	0.0235	0.032
PE(O-20:1_22:5)	PE	alkyl-acyl	682	M-H	PE(O-42:6)	(O-20:1_22:5)	(O-42:6)	805.599	20.708	C47 H84 N1 O7 P1	1	4	0	66.7	B	0.2145	0.231	0.2432	0.1904	0.1987	0.2058	0.2031	0.2311	0.2273	0.1653	0.1716	0.1946	0.1975	0.196	0.197	0.1781	0.1882	0.1498	0.208	0.1825	0.1964
PE(O-20:0_22:5)	PE	alkyl-acyl	684	M-H	PE(O-42:5)	(O-20:0_22:5)	(O-42:5)	807.614	20.884	C47 H86 N1 O7 P1	1	3	0	66.7	B	0.0446	0.0421	0.0525	0.0438	0.0409	0.0375	0.0401	0.0415	0.0497	0.0352	0.0339	0.0378	0.0469	0.0361	0.0393	0.0381	0.0373	0.0328	0.0493	0.0417	0.0415
PE(O-26:5_16:0)	PE	alkyl-acyl	685	M-H	PE(O-42:5)	(O-26:5_16:0)	(O-42:5)	807.614	21.069	C47 H86 N1 O7 P1	1	3	0	100	B	0.0265	0.0321	0.0228	0.0211	0.0212	0.0247	0.022	0.0335	0.0243	0.0225	0.0201	0.0248	0.0206	0.034	0.0283	0.0225	0.0251	0.0246	0.0206	0.0199	0.0267
PE(42:11)	PE	diacyl	897	M+H	PE(42:11)	(42:11)	(42:11)	809.5	13.746	C47 H72 N1 O8 P1	1	1	2	100	C	0.0339	0.0354	0.0378	0.0313	0.0348	0.0369	0.0309	0.0308	0.0326	0.0284	0.0304	0.0296	0.029	0.0348	0.0272	0.0275	0.0239	0.0216	0.0337	0.0316	0.0306
PE(19:0_22:4)	PE	diacyl	699	M-H	PE(41:4)	(19:0_22:4)	(41:4)	809.593	20.476	C46 H84 N1 O8 P1	1	1	2	100	A	0.0174	0.0255	0.0225	0.0149	0.0191	0.0191	0.0128	0.0147	0.041	0.0408	0.0199	0.0188	0.0231	0.0162	0.0388	0.0138	0.0155	0.0108	0.0199	0.0252	0.0315
PE(20:1_22:6)	PE	diacyl	720	M+H	PE(42:7)	(20:1_22:6)	(42:7)	817.562	18.022	C47 H80 N1 O8 P1	2	2	2	100	A	0.0547	0.0561	0.0603	0.0511	0.0574	0.0692	0.0567	0.0605	0.058	0.0519	0.0516	0.0512	0.0566	0.0617	0.0628	0.0391	0.0549	0.0406	0.0579	0.0524	0.0567
PE(42:7)	PE	diacyl	721	M+H	PE(42:7)	(42:7)	(42:7)	817.562	19.979	C47 H80 N1 O8 P1	1	2	6	100	C	0.0351	0.0318	0.0367	0.032	0.029	0.041	0.0301	0.0322	0.0312	0.0361	0.0394	0.0317	0.0367	0.0327	0.0326	0.0306	0.0341	0.0274	0.0367	0.0297	0.0277
PE(20:0_22:6)	PE	diacyl	725	M-H	PE(42:6)	(20:0_22:6)	(42:6)	819.578	20.053	C47 H82 N1 O8 P1	1	3	2	100	A	0.0137	0.0132	0.0137	0.0136	0.0109	0.0124	0.0112	0.0151	0.0167	0.0117	0.0106	0.0117	0.0137	0.012	0.013	0.0097	0.0133	0.009	0.0117	0.0125	0.0122
PE(18:1_24:4)	PE	diacyl	727	M-H	PE(42:5)	(18:1_24:4)	(42:5)	821.593	19.824	C47 H84 N1 O8 P1	1	3	0	100	B	0.0092	0.0122	0.0134	0.0109	0.0116	0.01	0.0104	0.013	0.012	0.0089	0.0087	0.0088	0.0111	0.0095	0.007	0.0095	0.0115	0.0066	0.0108	0.0104	0.0089
PE(22:0_20:4)	PE	diacyl	732	M-H	PE(42:4)	(22:0_20:4)	(42:4)	823.609	21.054	C47 H86 N1 O8 P1	1	2	2	100	A	0.0186	0.0244	0.0269	0.0173	0.019	0.0138	0.0156	0.0232	0.0121	0.0161	0.0173	0.0181	0.0172	0.0184	0.0194	0.0137	0.0156	0.0169	0.0199	0.0155	0.0174
PE(24:0_18:2)	PE	diacyl	937	M-H	PE(42:2)	(24:0_18:2)	(42:2)	827.64	21.6	C47 H90 N1 O8 P1	1	1	0	66.7	B	0.0052	0.0093	0.0077	0.0089	0.0057	0.0053	0.0101	0.0076	0.0065	0.0058	0.0079	0.0097	0.0096	0.0083	0.0085	0.0132	0.0179	0.017	0.0075	0.0087	0.0063
PE(24:0_18:1)	PE	diacyl	735	M-H	PE(42:1)	(24:0_18:1)	(42:1)	829.656	21.926	C47 H92 N1 O8 P1	1	1	1	100	B	0.0111	0.0086	0.0129	0.007	0.0092	0.0074	0.0123	0.0131	0.0118	0.0084	0.0101	0.0111	0.0085	0.0054	0.0096	0.0107	0.0119	0.0095	0.0108	0.0077	0.009
PE(O-22:1_22:6)	PE	alkyl-acyl	1007	M-H	PE(O-44:7)	(O-22:1_22:6)	(O-44:7)	831.614	21.193	C49 H86 N1 O7 P1	1	1	0	66.7	C	0.0095	0.0128	0.0113	0.01	0.01	0.0102	0.0102	0.0092	0.0125	0.01	0.01	0.0091	0.0108	0.0084	0.0092	0.0082	0.0082	0.0062	0.0102	0.009	0.0097
PE(O-24:2_20:4)	PE	alkyl-acyl	736	M-H	PE(O-44:6)	(O-24:2_20:4)	(O-44:6)	833.63	21.3	C49 H88 N1 O7 P1	1	1	0	100	B	0.0179	0.0248	0.0254	0.021	0.0209	0.0218	0.0185	0.0235	0.0193	0.0169	0.0192	0.0173	0.0195	0.0208	0.0185	0.0158	0.0205	0.0144	0.0186	0.0167	0.0175
PE(24:1_20:4)	PE	diacyl	740	M-H	PE(44:5)	(24:1_20:4)	(44:5)	849.625	21.001	C49 H88 N1 O8 P1	1	1	0	100	B	0.0104	0.0135	0.0116	0.0093	0.0085	0.0097	0.0088	0.0109	0.008	0.0097	0.0086	0.0082	0.011	0.0067	0.0083	0.0065	0.0096	0.0072	0.0079	0.0069	0.0105
PE(24:0_20:4)	PE	diacyl	742	M-H	PE(44:4)	(24:0_20:4)	(44:4)	851.64	21.556	C49 H90 N1 O8 P1	1	1	0	66.7	A	0.0178	0.0182	0.0184	0.0094	0.0139	0.0142	0.0138	0.0159	0.0139	0.0149	0.0134	0.0153	0.0095	0.0143	0.0112	0.0085	0.0167	0.0121	0.0169	0.0112	0.0167
PG(16:0_18:2)	PG	diacyl	275	M+NH4	PG(34:2)	(16:0_18:2)	(34:2)	746.51	12.521	C40 H75 O10 P1	2	2	2	100	A	0.0123	0.0142	0.0127	0.0112	0.0125	0.014	0.0114	0.0114	0.0133	0.0128	0.0109	0.0126	0.0138	0.0125	0.0116	0.0119	0.0153	0.0105	0.0122	0.0122	0.0123
PG(16:0_18:2)	PG	diacyl	276	M+NH4	PG(34:2)	(16:0_18:2)	(34:2)	746.51	13.889	C40 H75 O10 P1	1	2	2	100	A	0.0468	0.0482	0.0482	0.0454	0.045	0.0435	0.0413	0.046	0.049	0.0415	0.0417	0.0433	0.0501	0.0483	0.051	0.0423	0.0489	0.0387	0.0442	0.0496	0.0407
PG(16:0_18:2)	PG	diacyl	277	M+NH4	PG(34:2)	(16:0_18:2)	(34:2)	746.51	14.312	C40 H75 O10 P1	1	2	15	66.7	C	0.0327	0.0301	0.0314	0.0393	0.0459	0.0498	0.0354	0.0337	0.0452	0.039	0.0412	0.0498	0.0429	0.052	0.048	0.0475	0.0361	0.0451	0.0462	0.037	0.033
PG(18:2_18:3)	PG	diacyl	312	M+NH4	PG(36:5)	(18:2_18:3)	(36:5)	768.494	10.35	C42 H73 O10 P1	2	2	4	100	A	0.0163	0.0187	0.0158	0.0151	0.0162	0.0163	0.013	0.0154	0.0176	0.0162	0.0165	0.0166	0.0189	0.0167	0.0155	0.0171	0.0181	0.0168	0.0161	0.0156	0.0155
PG(16:0_20:4)	PG	diacyl	326	M+NH4	PG(36:4)	(16:0_20:4)	(36:4)	770.51	13.614	C42 H75 O10 P1	1	2	2	100	A	0.0319	0.0298	0.0238	0.0241	0.0258	0.0377	0.0235	0.0319	0.0297	0.0281	0.0264	0.0252	0.0337	0.0258	0.0267	0.0231	0.0287	0.0225	0.0198	0.0296	0.0301
PG(18:1_18:2)	PG	diacyl	340	M+NH4	PG(36:3)	(18:1_18:2)	(36:3)	772.525	12.842	C42 H77 O10 P1	1	2	2	100	A	0.1819	0.1965	0.1883	0.175	0.192	0.1774	0.1757	0.1839	0.1921	0.1866	0.1858	0.1942	0.2212	0.1818	0.1952	0.1985	0.2234	0.18	0.1791	0.1914	0.1906
PG(18:1_18:1)	PG	diacyl	364	M+NH4	PG(36:2)	(18:1_18:1)	(36:2)	774.541	14.43	C42 H79 O10 P1	2	3	2	100	A	0.042	0.0584	0.0516	0.0541	0.0567	0.0524	0.0545	0.044	0.0554	0.0527	0.0568	0.0523	0.0561	0.0556	0.0523	0.0621	0.0737	0.0667	0.0541	0.0579	0.0539
PG(16:0_20:2)	PG	diacyl	368	M+NH4	PG(36:2)	(16:0_20:2)	(36:2)	774.541	15.98	C42 H79 O10 P1	2	3	2	100	A	0.1252	0.1524	0.1442	0.1231	0.128	0.1151	0.1325	0.1393	0.1492	0.1304	0.1332	0.1499	0.1359	0.1317	0.1362	0.1484	0.1861	0.1365	0.1294	0.1268	0.1282
PG(18:2_20:2)	PG	diacyl	471	M+NH4	PG(38:4)	(18:2_20:2)	(38:4)	798.541	13.21	C44 H79 O10 P1	2	3	2	100	A	0.0132	0.0174	0.012	0.0133	0.0131	0.0132	0.0123	0.0116	0.014	0.0144	0.0124	0.0119	0.0153	0.0133	0.0157	0.0136	0.0138	0.0126	0.0129	0.0135	0.0137
PG(18:1_20:3)	PG	diacyl	472	M+NH4	PG(38:4)	(18:1_20:3)	(38:4)	798.541	13.456	C44 H79 O10 P1	2	3	2	100	A	0.019	0.0202	0.0169	0.0129	0.0147	0.0093	0.0111	0.0148	0.0163	0.0198	0.0202	0.025	0.0257	0.0189	0.0213	0.0202	0.03	0.0189	0.0186	0.013	0.014
PG(18:2_22:5)	PG	diacyl	693	M+NH4	PG(40:7)	(18:2_22:5)	(40:7)	820.525	11.405	C46 H77 O10 P1	2	3	0	100	A	0.0693	0.0773	0.071	0.0731	0.0704	0.0674	0.0585	0.0645	0.076	0.091	0.0802	0.0874	0.0847	0.071	0.0707	0.0612	0.0721	0.0501	0.073	0.0685	0.0715
PG(18:1_22:6)	PG	diacyl	698	M+NH4	PG(40:7)	(18:1_22:6)	(40:7)	820.525	12.21	C46 H77 O10 P1	3	3	2	100	A	0.1111	0.132	0.1094	0.1117	0.1145	0.1135	0.0954	0.1099	0.1181	0.1225	0.1177	0.128	0.1304	0.1225	0.1148	0.1134	0.135	0.0831	0.1149	0.1096	0.1138
PG(18:2_22:4)	PG	diacyl	707	M+NH4	PG(40:6)	(18:2_22:4)	(40:6)	822.541	12.609	C46 H79 O10 P1	2	4	2	100	A	0.068	0.0788	0.0756	0.0641	0.078	0.063	0.0634	0.0633	0.0674	0.0756	0.0681	0.0822	0.0825	0.0708	0.0689	0.0692	0.0858	0.052	0.0709	0.0745	0.0702
PG(18:1_22:4)	PG	diacyl	885	M+NH4	PG(40:5)	(18:1_22:4)	(40:5)	824.557	14.146	C46 H81 O10 P1	2	2	2	100	A	0.0407	0.0448	0.0434	0.0351	0.0389	0.0345	0.0324	0.0374	0.038	0.0608	0.0464	0.0595	0.0474	0.0451	0.0413	0.0487	0.0435	0.0434	0.0397	0.04	0.0398
PG(20:5_22:6)	PG	diacyl	719	M+NH4	PG(42:11)	(20:5_22:6)	(42:11)	840.494	9.744	C48 H73 O10 P1	2	1	2	100	A	0.0223	0.0294	0.0222	0.0218	0.0243	0.0251	0.0221	0.0191	0.0208	0.0277	0.0283	0.0303	0.0331	0.0282	0.0248	0.018	0.0248	0.0137	0.019	0.0245	0.0253
PG(20:4_22:6)	PG	diacyl	747	M+NH4	PG(42:10)	(20:4_22:6)	(42:10)	842.51	10.682	C48 H75 O10 P1	2	4	2	100	A	0.1223	0.3068	0.1646	0.2148	0.2216	0.2899	0.1947	0.2785	0.2162	0.4511	0.4799	0.4507	0.4693	0.402	0.355	0.2113	0.2468	0.1205	0.2539	0.2623	0.2691
PG(20:4_22:5)	PG	diacyl	761	M+NH4	PG(42:9)	(20:4_22:5)	(42:9)	844.525	11.782	C48 H77 O10 P1	2	2	0	100	A	0.0137	0.0149	0.0122	0.013	0.011	0.0151	0.0106	0.0136	0.0119	0.0106	0.0122	0.0127	0.0146	0.013	0.0154	0.0083	0.0136	0.0095	0.0115	0.0155	0.0112
PG(20:4_22:4)	PG	diacyl	780	M+NH4	PG(42:8)	(20:4_22:4)	(42:8)	846.541	12.373	C48 H79 O10 P1	2	3	2	100	A	0.0344	0.0466	0.0358	0.0355	0.0394	0.0399	0.0335	0.0375	0.0406	0.0382	0.0377	0.0387	0.0381	0.0353	0.037	0.0327	0.0418	0.0293	0.0342	0.0356	0.0355
PG(22:5_22:6)	PG	diacyl	815	M+NH4	PG(44:11)	(22:5_22:6)	(44:11)	868.525	11.416	C50 H77 O10 P1	2	2	0	100	B	0.0267	0.0277	0.0236	0.024	0.0273	0.0254	0.021	0.0242	0.0271	0.0321	0.0293	0.0316	0.0317	0.0252	0.0235	0.0195	0.0333	0.0212	0.0283	0.0287	0.0287
PG(22:5_22:5)	PG	diacyl	830	M+NH4	PG(44:10)	(22:5_22:5)	(44:10)	870.541	11.379	C50 H79 O10 P1	2	2	0	100	A	0.01	0.0118	0.0097	0.0091	0.0097	0.0099	0.0092	0.0101	0.0104	0.011	0.0106	0.0099	0.0105	0.0087	0.0091	0.0076	0.0098	0.0071	0.0094	0.0094	0.0085
PG(22:4_22:6)	PG	diacyl	831	M+NH4	PG(44:10)	(22:4_22:6)	(44:10)	870.541	11.988	C50 H79 O10 P1	3	2	2	100	A	0.049	0.0597	0.0498	0.0538	0.054	0.0534	0.0459	0.0537	0.0572	0.0558	0.0565	0.0569	0.0537	0.0556	0.0492	0.0485	0.0644	0.0422	0.0543	0.0496	0.0497
PG(22:4_22:5)	PG	diacyl	838	M+NH4	PG(44:9)	(22:4_22:5)	(44:9)	872.557	12.57	C50 H81 O10 P1	2	1	0	100	A	0.0151	0.0164	0.0172	0.015	0.0164	0.015	0.0128	0.0158	0.0138	0.0147	0.0159	0.0154	0.0163	0.0142	0.0144	0.0143	0.0175	0.0103	0.0144	0.0152	0.014
SM(d23:4)	SM	acyl	800	M+H	SM(d23:4)	(d23:4)	(d23:4)	542.348	5.776	C28 H51 N2 O6 P1	1	1	0	66.7	C	0.0028	0.0017	0.0022	0.0022	0.0025	0.0029	0.0021	0.0012	0.0018	0.001	0.0006	0.0008	0.0005	0.0009	0.0006	0.0011	0.0012	0.0011	0.0023	0.0018	0.0017
SM(d32:1)	SM	acyl	230	M+H	SM(d32:1)	(d32:1)	(d32:1)	674.536	12.113	C37 H75 N2 O6 P1	2	1	2	100	C	0.0429	0.0496	0.0455	0.0336	0.0312	0.0345	0.0412	0.0428	0.0435	0.0362	0.0349	0.0367	0.0377	0.0367	0.037	0.0392	0.0394	0.0376	0.0371	0.0365	0.0381
SM(d33:1)	SM	acyl	233	M+H	SM(d33:1)	(d33:1)	(d33:1)	688.552	13.233	C38 H77 N2 O6 P1	2	1	2	100	C	0.2185	0.2338	0.2344	0.1508	0.1381	0.1433	0.2055	0.2218	0.1949	0.1588	0.1543	0.167	0.1774	0.1654	0.1787	0.1741	0.1763	0.164	0.1781	0.183	0.1704
SM(d34:2)	SM	acyl	241	M+H	SM(d34:2)	(d34:2)	(d34:2)	700.552	12.491	C39 H77 N2 O6 P1	2	1	3	100	C	0.1474	0.1696	0.1631	0.1403	0.1366	0.1496	0.1484	0.1499	0.1415	0.1253	0.1282	0.1281	0.1462	0.1457	0.1387	0.1385	0.1374	0.1303	0.1517	0.1461	0.147
SM(d18:1_16:0)	SM	acyl	251	M+H	SM(d34:1)	(d18:1_16:0)	(d34:1)	702.568	14.356	C39 H79 N2 O6 P1	2	2	3	100	A	11.1021	11.5755	11.8989	7.846	6.9567	7.1162	10.5777	10.8927	9.9536	9.4257	8.7164	9.0243	8.5495	8.7568	9.0799	10.6943	10.6804	10.447	9.6803	9.0194	9.1169
SM(d34:0)	SM	acyl	267	M+H	SM(d34:0)	(d34:0)	(d34:0)	704.583	15.373	C39 H81 N2 O6 P1	2	1	2	100	C	0.4927	0.484	0.4834	0.3047	0.2639	0.2714	0.4239	0.428	0.3916	0.4331	0.3966	0.3968	0.3586	0.3653	0.3559	0.5077	0.5085	0.5189	0.3954	0.3544	0.3448
SM(d35:4)	SM	acyl	809	M+H	SM(d35:4)	(d35:4)	(d35:4)	710.536	13.226	C40 H75 N2 O6 P1	1	1	0	100	C	0.0125	0.0126	0.013	0.0089	0.0084	0.0089	0.0106	0.0109	0.01	0.0101	0.0102	0.0099	0.0085	0.0096	0.0085	0.0113	0.0118	0.0115	0.0093	0.01	0.0102
SM(d35:2)	SM	acyl	911	M+H	SM(d35:2)	(d35:2)	(d35:2)	714.568	14.018	C40 H79 N2 O6 P1	1	1	0	66.7	C	0.0453	0.0409	0.0401	0.0358	0.0305	0.018	0.0458	0.0453	0.0397	0.0552	0.0496	0.0467	0.0361	0.0433	0.0391	0.0504	0.0451	0.0479	0.0405	0.0363	0.0404
SM(d35:1)	SM	acyl	281	M+H	SM(d35:1)	(d35:1)	(d35:1)	716.583	15.715	C40 H81 N2 O6 P1	2	1	2	100	C	0.1998	0.2204	0.2237	0.1228	0.1101	0.1156	0.1689	0.1818	0.1584	0.1607	0.1481	0.1625	0.1373	0.1453	0.1468	0.1773	0.1853	0.1787	0.1533	0.1462	0.1571
SM(d36:5)	SM	acyl	819	M+H	SM(d36:5)	(d36:5)	(d36:5)	722.536	12.499	C41 H75 N2 O6 P1	1	1	0	100	C	0.0123	0.0138	0.0138	0.011	0.011	0.0118	0.0105	0.0118	0.0103	0.0112	0.0106	0.0104	0.0102	0.0119	0.0105	0.0117	0.0112	0.0105	0.0125	0.0105	0.0116
SM(d36:4)	SM	acyl	827	M+H	SM(d36:4)	(d36:4)	(d36:4)	724.552	14.331	C41 H77 N2 O6 P1	1	1	0	66.7	C	0.2944	0.274	0.2819	0.2329	0.2178	0.2493	0.27	0.248	0.2455	0.3206	0.2885	0.2773	0.2426	0.2528	0.2462	0.3481	0.3459	0.3514	0.2806	0.2356	0.2071
SM(d36:2)	SM	acyl	293	M+H	SM(d36:2)	(d36:2)	(d36:2)	728.583	14.886	C41 H81 N2 O6 P1	2	1	5	100	C	0.1553	0.178	0.1594	0.136	0.1459	0.1491	0.1447	0.1506	0.1582	0.1242	0.1267	0.133	0.1359	0.1455	0.1564	0.1422	0.1521	0.1372	0.1489	0.1403	0.1454
SM(d36:2)	SM	acyl	295	M+H	SM(d36:2)	(d36:2)	(d36:2)	728.583	15.236	C41 H81 N2 O6 P1	2	1	5	66.7	C	0.0447	0.0455	0.0431	0.0286	0.028	0.0243	0.0384	0.0424	0.0372	0.0323	0.0281	0.0304	0.0361	0.0353	0.0333	0.0373	0.0395	0.0412	0.031	0.0336	0.0333
SM(d36:1)	SM	acyl	301	M+H	SM(d36:1)	(d36:1)	(d36:1)	730.599	16.998	C41 H83 N2 O6 P1	2	1	3	100	C	1.7068	1.8706	1.7367	1.1125	0.9823	1.0181	1.6109	1.598	1.4379	1.5506	1.3138	1.3552	1.2891	1.2361	1.3001	1.6882	1.5948	1.6673	1.3842	1.3619	1.2367
SM(d36:0)	SM	acyl	314	M+H	SM(d36:0)	(d36:0)	(d36:0)	732.615	18.137	C41 H85 N2 O6 P1	2	1	3	100	C	0.1156	0.1251	0.1224	0.0605	0.0567	0.0546	0.0939	0.1148	0.0885	0.0996	0.0988	0.0981	0.0831	0.0889	0.094	0.0971	0.111	0.1114	0.0942	0.0956	0.0894
SM(d37:2)	SM	acyl	832	M+H	SM(d37:2)	(d37:2)	(d37:2)	742.599	16.225	C42 H83 N2 O6 P1	1	1	0	100	C	0.0181	0.0193	0.021	0.0155	0.0151	0.0146	0.017	0.0182	0.0164	0.0126	0.0133	0.0151	0.0147	0.0136	0.0179	0.0155	0.0174	0.0188	0.0174	0.0153	0.0177
SM(d37:1)	SM	acyl	351	M+H	SM(d37:1)	(d37:1)	(d37:1)	744.615	18.539	C42 H85 N2 O6 P1	2	1	2	100	C	0.3128	0.3593	0.3507	0.1708	0.1691	0.1792	0.2359	0.3027	0.2213	0.2095	0.2141	0.2715	0.1745	0.1992	0.2239	0.2256	0.289	0.3125	0.2189	0.2081	0.2139
SM(d38:2)	SM	acyl	372	M+H	SM(d38:2)	(d38:2)	(d38:2)	756.615	16.005	C43 H85 N2 O6 P1	1	1	3	100	C	0.034	0.0388	0.0377	0.0353	0.0388	0.0325	0.0416	0.04	0.0399	0.0438	0.0438	0.0417	0.0409	0.0431	0.0401	0.0438	0.0411	0.042	0.039	0.0385	0.0402
SM(d38:2)	SM	acyl	373	M+H	SM(d38:2)	(d38:2)	(d38:2)	756.615	17.648	C43 H85 N2 O6 P1	2	1	3	100	C	0.1667	0.1853	0.1826	0.1537	0.1424	0.1528	0.1689	0.1597	0.1574	0.1397	0.1317	0.1431	0.1455	0.1497	0.1472	0.1546	0.1553	0.1548	0.1529	0.1566	0.1538
SM(d38:2)	SM	acyl	374	M+H	SM(d38:2)	(d38:2)	(d38:2)	756.615	18.044	C43 H85 N2 O6 P1	1	1	3	100	C	0.0283	0.0367	0.0415	0.0206	0.0176	0.0199	0.0248	0.0257	0.0207	0.0276	0.0318	0.036	0.0265	0.0369	0.0261	0.0387	0.038	0.0379	0.0348	0.036	0.0221
SM(d38:1)	SM	acyl	388	M+H	SM(d38:1)	(d38:1)	(d38:1)	758.63	19.686	C43 H87 N2 O6 P1	2	1	2	100	C	1.7445	1.8478	1.7982	0.9663	0.905	0.9436	1.4315	1.5969	1.4024	1.4276	1.3001	1.3681	1.1094	1.1252	1.1972	1.5885	1.6368	1.6959	1.337	1.2324	1.2247
SM(d38:0)	SM	acyl	400	M+H	SM(d38:0)	(d38:0)	(d38:0)	760.646	20.278	C43 H89 N2 O6 P1	2	1	2	66.7	C	0.0506	0.0545	0.0557	0.0187	0.0206	0.0217	0.037	0.0474	0.0336	0.0308	0.0351	0.032	0.0241	0.0308	0.0319	0.0365	0.0422	0.0494	0.0356	0.0287	0.0281
SM(d39:2)	SM	acyl	837	M+H	SM(d39:2)	(d39:2)	(d39:2)	770.63	19.049	C44 H87 N2 O6 P1	1	1	1	100	C	0.0223	0.0272	0.0223	0.0183	0.0218	0.0231	0.0243	0.0241	0.022	0.02	0.0193	0.0202	0.0234	0.0224	0.0232	0.0225	0.0216	0.0216	0.0243	0.0213	0.0226
SM(d39:1)	SM	acyl	402	M+H	SM(d39:1)	(d39:1)	(d39:1)	772.646	20.427	C44 H89 N2 O6 P1	2	1	5	100	C	0.2342	0.2774	0.2704	0.1285	0.1206	0.1253	0.2087	0.2362	0.1887	0.1989	0.1656	0.1933	0.1513	0.1564	0.165	0.2096	0.2161	0.2287	0.1917	0.1676	0.1765
SM(d40:4)	SM	acyl	931	M+H	SM(d40:4)	(d40:4)	(d40:4)	780.615	15.885	C45 H85 N2 O6 P1	1	2	0	66.7	C	0.0092	0.0116	0.0117	0.0102	0.0078	0.0097	0.01	0.0082	0.0091	0.0082	0.0081	0.0069	0.008	0.0082	0.009	0.0102	0.0085	0.0087	0.008	0.0084	0.0075
SM(d40:3)	SM	acyl	415	M+H	SM(d40:3)	(d40:3)	(d40:3)	782.63	17.7	C45 H87 N2 O6 P1	2	1	1	100	C	0.1644	0.1812	0.1812	0.1496	0.1449	0.1556	0.1783	0.1704	0.1753	0.1292	0.1414	0.1377	0.1352	0.1479	0.1463	0.1475	0.1628	0.1613	0.1488	0.149	0.1521
SM(d40:2)	SM	acyl	436	M+H	SM(d40:2)	(d40:2)	(d40:2)	784.646	18.857	C45 H89 N2 O6 P1	1	1	3	66.7	C	0.0185	0.0187	0.0219	0.0173	0.0179	0.0175	0.0196	0.0222	0.0207	0.017	0.0158	0.0163	0.0186	0.0163	0.0175	0.0185	0.0199	0.0192	0.0169	0.0161	0.0154
SM(d40:2)	SM	acyl	438	M+H	SM(d40:2)	(d40:2)	(d40:2)	784.646	20.009	C45 H89 N2 O6 P1	2	1	3	100	C	0.5071	0.5775	0.5776	0.4404	0.4362	0.4404	0.5192	0.5118	0.5077	0.416	0.4215	0.4566	0.4064	0.4595	0.4492	0.4551	0.517	0.4958	0.457	0.4681	0.4785
SM(d40:1)	SM	acyl	451	M+H	SM(d40:1)	(d40:1)	(d40:1)	786.661	20.865	C45 H91 N2 O6 P1	2	1	2	100	C	3.3175	3.5174	3.3103	1.5807	1.5063	1.5813	2.2399	2.5161	2.2132	2.5151	2.3667	2.4657	1.8124	1.9432	2.092	2.6451	2.7064	3.1027	2.2406	2.1632	2.192
SM(d41:3)	SM	acyl	474	M+H	SM(d41:3)	(d41:3)	(d41:3)	796.646	16.022	C46 H89 N2 O6 P1	1	1	0	100	C	0.0146	0.0145	0.0158	0.0147	0.0128	0.0159	0.0135	0.0152	0.0138	0.0143	0.0118	0.0146	0.0148	0.0127	0.0137	0.0166	0.0153	0.0167	0.0149	0.0128	0.0132
SM(d41:3)	SM	acyl	475	M+H	SM(d41:3)	(d41:3)	(d41:3)	796.646	19.037	C46 H89 N2 O6 P1	2	1	0	100	C	0.0444	0.0498	0.0495	0.0376	0.0347	0.0367	0.0432	0.0452	0.0452	0.0333	0.0377	0.034	0.0384	0.0354	0.0377	0.0423	0.0449	0.0403	0.0401	0.0387	0.038
SM(d41:2)	SM	acyl	482	M+H	SM(d41:2)	(d41:2)	(d41:2)	798.661	20.382	C46 H91 N2 O6 P1	2	1	2	100	C	0.1769	0.1879	0.1873	0.1339	0.1169	0.1324	0.1552	0.1728	0.1537	0.1271	0.1349	0.1417	0.129	0.136	0.1324	0.1555	0.1638	0.158	0.1427	0.1404	0.1367
SM(d41:1)	SM	acyl	549	M+H	SM(d41:1)	(d41:1)	(d41:1)	800.677	21.318	C46 H93 N2 O6 P1	2	1	3	100	C	0.8759	0.928	0.9248	0.3993	0.3893	0.4065	0.6524	0.7598	0.6285	0.65	0.6112	0.6555	0.4548	0.4942	0.5345	0.6891	0.6956	0.8164	0.5887	0.5781	0.5958
SM(d42:5)	SM	acyl	860	M+H	SM(d42:5)	(d42:5)	(d42:5)	806.63	16.625	C47 H87 N2 O6 P1	1	1	0	100	C	0.0344	0.0373	0.0399	0.0294	0.0316	0.032	0.0372	0.0367	0.0335	0.0213	0.0241	0.0261	0.0312	0.0291	0.0317	0.0236	0.0264	0.0223	0.0306	0.0308	0.0317
SM(d42:4)	SM	acyl	668	M+H	SM(d42:4)	(d42:4)	(d42:4)	808.646	18.113	C47 H89 N2 O6 P1	2	2	0	100	C	0.1444	0.1588	0.1639	0.1523	0.1544	0.1577	0.1519	0.1654	0.1575	0.1372	0.1537	0.1732	0.178	0.19	0.1658	0.15	0.1596	0.1347	0.172	0.1774	0.1586
SM(d42:4)	SM	acyl	669	M+H	SM(d42:4)	(d42:4)	(d42:4)	808.646	18.472	C47 H89 N2 O6 P1	2	2	0	66.7	C	0.1632	0.1788	0.1901	0.1277	0.137	0.1502	0.1466	0.1742	0.131	0.1144	0.1281	0.1477	0.1158	0.1229	0.1453	0.1251	0.151	0.1503	0.1293	0.1345	0.1274
SM(d18:1_24:3)	SM	acyl	670	M+H	SM(d42:4)	(d18:1_24:3)	(d42:4)	808.646	20.881	C47 H89 N2 O6 P1	1	2	0	100	C	0.0368	0.0281	0.0368	0.0221	0.019	0.0252	0.0208	0.0234	0.022	0.0323	0.0366	0.0343	0.0208	0.0263	0.0256	0.0348	0.0347	0.0441	0.0297	0.024	0.0236
SM(d42:3)	SM	acyl	685	M+H	SM(d42:3)	(d42:3)	(d42:3)	810.661	19.938	C47 H91 N2 O6 P1	2	2	1	100	C	5.1999	5.6686	5.607	4.3279	3.9999	4.5124	5.3398	5.2351	5.189	4.4574	4.4501	4.6712	4.4538	4.4184	4.4914	5.221	5.3844	5.0187	4.8736	4.6871	4.4537
SM(d42:2)	SM	acyl	704	M+H	SM(d42:2)	(d42:2)	(d42:2)	812.677	20.78	C47 H93 N2 O6 P1	2	1	2	100	C	8.8818	9.4708	9.5077	6.9263	6.744	7.3091	8.167	8.5207	8.3946	7.6126	7.2564	7.8532	7.3746	7.1537	7.5133	8.9771	9.0845	8.8595	8.2165	7.5538	7.5709
SM(d42:1)	SM	acyl	723	M+H	SM(d42:1)	(d42:1)	(d42:1)	814.693	21.675	C47 H95 N2 O6 P1	2	1	2	100	C	2.1623	2.2684	2.3135	1.016	0.945	0.9845	1.638	1.9674	1.5124	1.9284	1.7426	1.8122	1.1876	1.2943	1.3954	1.6403	1.6535	2.1219	1.6176	1.533	1.5377
SM(d18:2_25:2)	SM	acyl	950	M+H	SM(d43:4)	(d18:2_25:2)	(d43:4)	822.661	21.335	C48 H91 N2 O6 P1	1	1	0	66.7	C	0.0286	0.0311	0.0305	0.0146	0.0133	0.0155	0.0214	0.024	0.0198	0.023	0.0224	0.0228	0.0121	0.0148	0.016	0.021	0.0206	0.0285	0.0208	0.018	0.0184
SM(d43:2)	SM	acyl	751	M+H	SM(d43:2)	(d43:2)	(d43:2)	826.693	21.267	C48 H95 N2 O6 P1	2	1	3	100	C	0.0836	0.0947	0.0918	0.0534	0.0541	0.0574	0.0712	0.0809	0.0736	0.0668	0.0626	0.0667	0.0573	0.0596	0.0605	0.0731	0.0753	0.0791	0.0689	0.0668	0.0674
SM(d43:1)	SM	acyl	762	M+H	SM(d43:1)	(d43:1)	(d43:1)	828.708	22.098	C48 H97 N2 O6 P1	2	1	4	66.7	C	0.0532	0.0571	0.0519	0.025	0.0249	0.0262	0.0429	0.0478	0.0361	0.0422	0.0377	0.0422	0.027	0.03	0.0316	0.0377	0.042	0.053	0.0384	0.0359	0.0396
SM(d44:6)	SM	acyl	868	M+H	SM(d44:6)	(d44:6)	(d44:6)	832.646	19.95	C49 H89 N2 O6 P1	1	1	0	100	C	0.0871	0.0904	0.0877	0.08	0.0782	0.0867	0.0954	0.0808	0.0834	0.104	0.0909	0.0941	0.08	0.0896	0.0798	0.1134	0.1062	0.1149	0.0908	0.0827	0.0759
SM(d44:5)	SM	acyl	874	M+H	SM(d44:5)	(d44:5)	(d44:5)	834.661	18.908	C49 H91 N2 O6 P1	1	1	0	66.7	C	0.0099	0.0125	0.0131	0.0115	0.0107	0.0102	0.0115	0.0115	0.0112	0.009	0.0099	0.0094	0.0106	0.0104	0.0094	0.0109	0.0106	0.0088	0.0115	0.0097	0.0106
SM(d44:5)	SM	acyl	875	M+H	SM(d44:5)	(d44:5)	(d44:5)	834.661	20.785	C49 H91 N2 O6 P1	1	1	0	100	C	0.1054	0.0957	0.1082	0.1006	0.1054	0.1067	0.0834	0.0777	0.0857	0.1196	0.1139	0.1087	0.1033	0.1044	0.0983	0.121	0.1252	0.1271	0.1086	0.0962	0.0912
SM(d44:4)	SM	acyl	881	M+H	SM(d44:4)	(d44:4)	(d44:4)	836.677	21.676	C49 H93 N2 O6 P1	1	1	0	100	C	0.0642	0.0742	0.0726	0.0362	0.0356	0.0451	0.0542	0.0609	0.0506	0.0534	0.0524	0.0539	0.0299	0.0387	0.0384	0.0474	0.0558	0.0697	0.0505	0.0455	0.046
SM(d44:3)	SM	acyl	782	M+H	SM(d44:3)	(d44:3)	(d44:3)	838.693	20.981	C49 H95 N2 O6 P1	2	1	0	100	C	0.0529	0.0569	0.0597	0.0356	0.0326	0.0345	0.0392	0.0463	0.0446	0.04	0.0398	0.0413	0.0372	0.0355	0.0367	0.0464	0.0449	0.0472	0.0372	0.0406	0.04
SM(d44:2)	SM	acyl	794	M+H	SM(d44:2)	(d44:2)	(d44:2)	840.708	21.62	C49 H97 N2 O6 P1	2	1	1	100	C	0.038	0.0416	0.0407	0.0231	0.023	0.0245	0.035	0.0382	0.0307	0.0315	0.0307	0.0307	0.0254	0.0242	0.0272	0.0292	0.0345	0.035	0.0319	0.0308	0.0302
SPH(d16:1)	SPH	Sphingosine	1095	M+H	SPH(d16:1)	(d16:1)	(d16:1)	271.251	7.085	C16 H33 N1 O2	1	1	0	100	C	0.019	0.0254	0.0319	0.154	0.185	0.1859	0.0971	0.0706	0.0993	0.0578	0.0697	0.0826	0.1607	0.1422	0.1391	0.2794	0.255	0.3846	0.1074	0.1421	0.1233
SPH(d16:0)	SPH	Sphinganine	1111	M+H	SPH(d16:0)	(d16:0)	(d16:0)	273.267	2.425	C16 H35 N1 O2	1	1	0	100	C	0.0962	0.0897	0.0917	0.3774	0.4426	0.4157	0.5346	0.4634	0.5391	0.574	0.6353	0.621	0.0832	0.0789	0.0753	0.263	0.2279	0.3457	0.4178	0.4445	0.4618
SPH(d17:0)	SPH	Sphinganine	1371	M+H	SPH(d17:0)	(d17:0)	(d17:0)	287.282	3.284	C17 H37 N1 O2	1	1	0	66.7	C	0.0591	0.061	0.0648	0.0108	0.0102	0.0107	0.0127	0.0086	0.013	0.0058	0.0084	0.0077	0.0057	0.0078	0.0054	0.0051	0.0071	0.0065	0.0165	0.0191	0.0181
SPH(d18:2)	SPH	Sphingosine	1438	M+H	SPH(d18:2)	(d18:2)	(d18:2)	297.267	3.799	C18 H35 N1 O2	1	1	0	66.7	C	0.0115	0.0123	0.0148	0.0124	0.017	0.0133	0.1057	0.0949	0.1129	0.0095	0.0114	0.0105	0.0129	0.0127	0.0174	0.0114	0.0145	0.011	0.0314	0.0323	0.0328
SPH(d18:1)	SPH	Sphingosine	1372	M+H	SPH(d18:1)	(d18:1)	(d18:1)	299.282	4.291	C18 H37 N1 O2	1	1	0	100	C	0.0102	0.014	0.0208	0.0359	0.0321	0.0319	0.038	0.0353	0.0392	0.0398	0.0464	0.0472	0.0159	0.0164	0.0164	0.0432	0.0297	0.0186	0.0451	0.0504	0.0513
SPH(d18:1)	SPH	Sphingosine	1374	M+H	SPH(d18:1)	(d18:1)	(d18:1)	299.282	4.806	C18 H37 N1 O2	1	1	0	100	C	0.3661	0.3831	0.3513	0.3319	0.3184	0.3398	0.3511	0.3812	0.39	0.2867	0.295	0.3011	0.3629	0.3574	0.3446	0.3302	0.3487	0.3276	0.3421	0.3297	0.3327
SPH(d18:0)	SPH	Sphinganine	1384	M+H	SPH(d18:0)	(d18:0)	(d18:0)	301.298	3.99	C18 H39 N1 O2	1	1	0	100	C	0.043	0.0401	0.0425	0.1541	0.163	0.16	0.2141	0.1906	0.2215	0.2185	0.2373	0.232	0.03	0.0299	0.0253	0.1032	0.0918	0.139	0.1448	0.1693	0.161
SPH(d18:0)	SPH	Sphinganine	1385	M+H	SPH(d18:0)	(d18:0)	(d18:0)	301.298	5.097	C18 H39 N1 O2	2	1	0	100	C	0.1333	0.1172	0.1154	0.0797	0.0856	0.0831	0.107	0.1031	0.1109	0.0807	0.0769	0.0843	0.0731	0.0875	0.0753	0.0976	0.0999	0.1025	0.1075	0.1218	0.1068
SPH(d20:0)	SPH	Sphinganine	1395	M+H	SPH(d20:0)	(d20:0)	(d20:0)	329.329	5.084	C20 H43 N1 O2	1	1	0	100	C	0.0313	0.0332	0.0467	0.0972	0.114	0.0938	0.1377	0.135	0.1322	0.1568	0.1418	0.1655	0.0362	0.0298	0.0759	0.0698	0.0747	0.0723	0.1082	0.1164	0.1061
TG(O-13:0_16:0_3:0)	TG	alkyl-acyl	2086	M+NH4	TG(O-32:0)	(O-13:0_16:0_3:0)	(O-32:0)	568.507	20.9	C35 H68 O5	1	1	0	100	B	0.2232	0.2381	0.2245	0.1602	0.1489	0.1597	0.1466	0.11	0.1441	0.1754	0.1725	0.174	0.2147	0.1926	0.1843	0.2647	0.2209	0.199	0.1722	0.1806	0.2122
TG(8:0_12:0_14:0)	TG	triacyl	2101	M+NH4	TG(34:0)	(8:0_12:0_14:0)	(34:0)	610.517	21.22	C37 H70 O6	1	2	0	100	A	0.0022	0.003	0.0019	0.0022	0.003	0.0024	0.0044	0.0033	0.0043	0.0031	0.0027	0.0022	0.0125	0.0036	0.0023	0.0028	0.0026	0.0017	0.0043	0.0036	0.0046
TG(4:0_16:0_16:1)	TG	triacyl	2110	M+NH4	TG(36:1)	(4:0_16:0_16:1)	(36:1)	636.533	21.398	C39 H72 O6	1	1	0	66.7	A	0.0126	0.0105	0.0106	0.0111	0.01	0.0091	0.0092	0.0096	0.0098	0.0081	0.0081	0.0078	0.0119	0.0124	0.009	0.0131	0.0096	0.0086	0.0096	0.0094	0.012
TG(10:0_12:0_14:0)	TG	triacyl	2112	M+NH4	TG(36:0)	(10:0_12:0_14:0)	(36:0)	638.549	21.687	C39 H74 O6	1	2	0	66.7	A	0.0154	0.0161	0.0143	0.0165	0.0162	0.0136	0.0193	0.0163	0.0198	0.0156	0.0131	0.0136	0.0328	0.0199	0.0138	0.0209	0.0154	0.0131	0.0184	0.0175	0.0205
TG(6:0_16:0_16:1)	TG	triacyl	2140	M+NH4	TG(38:1)	(6:0_16:0_16:1)	(38:1)	664.564	21.827	C41 H76 O6	1	1	0	100	A	0.036	0.0306	0.0313	0.0311	0.0285	0.0243	0.0263	0.0289	0.0296	0.0253	0.0233	0.0235	0.0346	0.0281	0.0251	0.0342	0.0269	0.0246	0.0299	0.028	0.0318
TG(12:0_12:0_14:0)	TG	triacyl	2141	M+NH4	TG(38:0)	(12:0_12:0_14:0)	(38:0)	666.58	22.101	C41 H78 O6	1	1	1	100	A	0.0123	0.0133	0.0119	0.0127	0.0137	0.0115	0.0166	0.0136	0.0149	0.0147	0.0138	0.0137	0.0325	0.0173	0.0131	0.0163	0.0123	0.012	0.0154	0.0152	0.018
TG(5:0_16:0_18:2)	TG	triacyl	2169	M+NH4	TG(39:2)	(5:0_16:0_18:2)	(39:2)	676.564	21.664	C42 H76 O6	1	1	0	100	A	0.0049	0.0042	0.0044	0.0045	0.005	0.0041	0.0043	0.0037	0.0049	0.0045	0.0033	0.0039	0.0053	0.0047	0.0042	0.0055	0.004	0.0039	0.0041	0.0042	0.0051
TG(4:0_18:2_18:2)	TG	triacyl	2170	M+NH4	TG(40:4)	(4:0_18:2_18:2)	(40:4)	686.549	21.123	C43 H74 O6	1	1	0	100	A	0.0113	0.0084	0.0108	0.0082	0.0075	0.0099	0.0069	0.0091	0.0067	0.0068	0.0073	0.0076	0.0064	0.0072	0.0081	0.0078	0.0076	0.0081	0.008	0.0074	0.0075
TG(4:0_18:1_18:2)	TG	triacyl	2181	M+NH4	TG(40:3)	(4:0_18:1_18:2)	(40:3)	688.564	21.522	C43 H76 O6	1	2	0	100	A	0.023	0.0224	0.0226	0.021	0.02	0.0198	0.0189	0.0193	0.0201	0.017	0.0161	0.017	0.0216	0.0204	0.0179	0.0229	0.0174	0.0163	0.0198	0.0205	0.0225
TG(12:0_14:0_14:0)	TG	triacyl	2192	M+NH4	TG(40:0)	(12:0_14:0_14:0)	(40:0)	694.611	22.379	C43 H82 O6	1	1	1	100	A	0.0078	0.0081	0.0078	0.0073	0.0082	0.0082	0.0107	0.009	0.0099	0.0086	0.0081	0.0078	0.0198	0.0103	0.008	0.0101	0.0076	0.007	0.0094	0.0086	0.011
TG(6:0_18:1_18:2)	TG	triacyl	2222	M+NH4	TG(42:3)	(6:0_18:1_18:2)	(42:3)	716.595	21.864	C45 H80 O6	1	1	0	100	B	0.0112	0.0118	0.0123	0.0118	0.0113	0.0094	0.0109	0.0115	0.0115	0.0085	0.0093	0.009	0.0119	0.0116	0.0098	0.0127	0.0103	0.0092	0.0106	0.0102	0.012
TG(10:0_14:0_18:1)	TG	triacyl	2234	M+NH4	TG(42:1)	(10:0_14:0_18:1)	(42:1)	720.627	22.386	C45 H84 O6	1	1	0	100	A	0.0161	0.0143	0.0146	0.0139	0.014	0.0128	0.0138	0.013	0.0145	0.0128	0.0127	0.0124	0.0191	0.0179	0.0137	0.0167	0.0124	0.0123	0.0142	0.0127	0.0163
TG(12:0_14:0_16:0)	TG	triacyl	2235	M+NH4	TG(42:0)	(12:0_14:0_16:0)	(42:0)	722.642	22.682	C45 H86 O6	1	1	1	100	A	0.01	0.0094	0.0088	0.0095	0.0094	0.0099	0.0115	0.0104	0.0112	0.0153	0.0116	0.0135	0.0243	0.0161	0.0147	0.0151	0.0082	0.0081	0.0125	0.0132	0.0149
TG(10:0_16:1_18:1)	TG	triacyl	2246	M+NH4	TG(44:2)	(10:0_16:1_18:1)	(44:2)	746.642	22.424	C47 H86 O6	1	3	0	100	A	0.0491	0.0418	0.0424	0.0374	0.0401	0.0384	0.0387	0.0363	0.0416	0.0376	0.04	0.038	0.0526	0.0497	0.0407	0.0472	0.0363	0.0332	0.0401	0.037	0.0463
TG(12:0_16:0_16:1)	TG	triacyl	2254	M+NH4	TG(44:1)	(12:0_16:0_16:1)	(44:1)	748.658	22.687	C47 H88 O6	1	1	1	100	A	0.0416	0.0317	0.0339	0.0361	0.0347	0.0329	0.0347	0.0313	0.0353	0.0445	0.0379	0.0435	0.0565	0.0577	0.0444	0.0484	0.0262	0.0309	0.0399	0.0411	0.0436
TG(14:0_14:0_16:0)	TG	triacyl	2256	M+NH4	TG(44:0)	(14:0_14:0_16:0)	(44:0)	750.674	22.978	C47 H90 O6	1	1	1	100	A	0.0341	0.0291	0.032	0.0264	0.0185	0.0235	0.0246	0.025	0.0281	0.0356	0.0323	0.0337	0.0446	0.0392	0.0282	0.0379	0.0266	0.0272	0.0254	0.0275	0.0348
TG(14:0_15:0_16:1)	TG	triacyl	2267	M+NH4	TG(45:1)	(14:0_15:0_16:1)	(45:1)	762.674	22.829	C48 H90 O6	1	2	1	66.7	A	0.0041	0.0037	0.0033	0.0033	0.0036	0.0031	0.005	0.0041	0.0076	0.0034	0.0035	0.0037	0.006	0.0048	0.0039	0.0055	0.0036	0.0041	0.0051	0.0047	0.005
TG(14:0_15:0_16:0)	TG	triacyl	2273	M+NH4	TG(45:0)	(14:0_15:0_16:0)	(45:0)	764.689	23.129	C48 H92 O6	1	1	1	100	A	0.0041	0.0052	0.0036	0.0063	0.0048	0.0055	0.0055	0.0047	0.006	0.0095	0.0077	0.0074	0.0135	0.0061	0.0067	0.0085	0.0068	0.0063	0.0067	0.0065	0.0078
TG(10:0_18:2_18:2)	TG	triacyl	2275	M+NH4	TG(46:4)	(10:0_18:2_18:2)	(46:4)	770.642	22.194	C49 H86 O6	1	2	0	66.7	A	0.0154	0.0096	0.0119	0.0122	0.0129	0.0124	0.0131	0.0111	0.0119	0.0146	0.0103	0.0144	0.0165	0.0145	0.0124	0.0125	0.0091	0.01	0.0129	0.0133	0.015
TG(14:1_16:1_16:1)	TG	triacyl	2279	M+NH4	TG(46:3)	(14:1_16:1_16:1)	(46:3)	772.658	22.436	C49 H88 O6	1	3	1	66.7	A	0.0621	0.0525	0.0541	0.0516	0.0518	0.0503	0.0517	0.0489	0.0514	0.0493	0.052	0.0474	0.0664	0.0646	0.0554	0.0603	0.0461	0.0424	0.0502	0.0497	0.0584
TG(14:0_16:0_16:0)	TG	triacyl	3186	M+NH4	TG(46:0)	(14:0_16:0_16:0)	(46:0)	778.705	23.269	C49 H94 O6	1	1	1	66.7	A	0.0808	0.0903	0.0884	0.0694	0.0609	0.0665	0.0673	0.0677	0.0685	0.0852	0.0798	0.069	0.099	0.0952	0.0831	0.1231	0.1009	0.0769	0.0736	0.0803	0.074
TG(12:0_17:1_18:2)	TG	triacyl	2299	M+NH4	TG(47:3)	(12:0_17:1_18:2)	(47:3)	786.674	22.597	C50 H90 O6	1	2	1	66.7	A	0.0049	0.0047	0.0044	0.0049	0.0049	0.0049	0.0049	0.0048	0.0054	0.0057	0.0062	0.0051	0.0082	0.007	0.0058	0.0062	0.0047	0.0042	0.0052	0.0056	0.0056
TG(14:0_15:0_18:2)	TG	triacyl	2302	M+NH4	TG(47:2)	(14:0_15:0_18:2)	(47:2)	788.689	22.864	C50 H92 O6	1	1	1	100	A	0.0164	0.0142	0.0148	0.0151	0.0156	0.0132	0.015	0.0135	0.0184	0.0161	0.0145	0.0149	0.0201	0.017	0.0151	0.0179	0.0151	0.0138	0.0156	0.0163	0.0186
TG(15:0_16:0_16:1)	TG	triacyl	2308	M+NH4	TG(47:1)	(15:0_16:0_16:1)	(47:1)	790.705	23.13	C50 H94 O6	1	1	1	100	A	0.0194	0.0175	0.0166	0.0206	0.0181	0.0179	0.0188	0.0189	0.0246	0.0222	0.0185	0.0215	0.0282	0.0198	0.0216	0.0267	0.0189	0.0179	0.0229	0.0208	0.025
TG(15:0_16:0_16:0)	TG	triacyl	2310	M+NH4	TG(47:0)	(15:0_16:0_16:0)	(47:0)	792.721	23.426	C50 H96 O6	1	1	1	100	A	0.0186	0.0164	0.017	0.0164	0.0142	0.0151	0.0168	0.0148	0.0162	0.0249	0.0251	0.024	0.0314	0.0274	0.0238	0.0274	0.0209	0.0171	0.0203	0.0197	0.0216
TG(16:0_14:2_18:2)	TG	triacyl	2349	M+NH4	TG(48:4)	(16:0_14:2_18:2)	(48:4)	798.674	22.478	C51 H90 O6	1	3	0	100	A	0.1183	0.0971	0.0979	0.0872	0.0825	0.0837	0.0941	0.0637	0.0811	0.0907	0.0997	0.0853	0.1084	0.1038	0.0891	0.0945	0.0834	0.0616	0.092	0.0938	0.0864
TG(14:0_16:1_18:2)	TG	triacyl	2354	M+NH4	TG(48:3)	(14:0_16:1_18:2)	(48:3)	800.689	22.724	C51 H92 O6	2	2	1	100	A	0.292	0.2958	0.2958	0.2971	0.3081	0.2852	0.2923	0.2835	0.3033	0.3535	0.3519	0.3304	0.4306	0.4143	0.3585	0.3564	0.2692	0.2612	0.3292	0.3195	0.3967
TG(14:0_16:0_18:2)	TG	triacyl	2360	M+NH4	TG(48:2)	(14:0_16:0_18:2)	(48:2)	802.705	23.001	C51 H94 O6	2	2	1	100	A	0.8564	0.7936	0.6946	0.7627	0.6898	0.7252	0.7136	0.6524	0.7364	0.7734	0.7111	0.7141	0.9128	0.8948	0.7247	0.9045	0.6546	0.7163	0.6691	0.7353	0.876
TG(14:0_16:0_18:1)	TG	triacyl	3189	M+NH4	TG(48:1)	(14:0_16:0_18:1)	(48:1)	804.721	23.266	C51 H96 O6	1	2	1	66.7	A	0.473	0.5223	0.5366	0.5232	0.494	0.4796	0.4542	0.4468	0.4878	0.4548	0.4239	0.3733	0.4979	0.5586	0.4751	0.6117	0.5164	0.4824	0.4915	0.504	0.4854
TG(16:1_16:1_17:1)	TG	triacyl	2412	M+NH4	TG(49:3)	(16:1_16:1_17:1)	(49:3)	814.705	22.878	C52 H94 O6	1	1	1	100	A	0.0357	0.0314	0.0336	0.0319	0.0329	0.0295	0.0317	0.0295	0.0337	0.0366	0.0318	0.0335	0.0446	0.0376	0.0343	0.0395	0.0292	0.0313	0.0344	0.0356	0.0387
TG(15:0_16:1_18:1)	TG	triacyl	2419	M+NH4	TG(49:2)	(15:0_16:1_18:1)	(49:2)	816.721	23.156	C52 H96 O6	1	2	1	66.7	A	0.0974	0.09	0.0912	0.1005	0.1033	0.0955	0.0919	0.0877	0.0955	0.1131	0.112	0.1068	0.1335	0.1249	0.117	0.1253	0.0943	0.0944	0.109	0.1008	0.1211
TG(15:0_16:0_18:1)	TG	triacyl	2429	M+NH4	TG(49:1)	(15:0_16:0_18:1)	(49:1)	818.736	23.423	C52 H98 O6	1	1	1	100	A	0.0665	0.0556	0.0549	0.0642	0.06	0.0582	0.0628	0.0561	0.0637	0.0794	0.0708	0.0676	0.0867	0.0842	0.0719	0.0765	0.0596	0.0585	0.0665	0.0683	0.0782
TG(16:0_16:0_17:0)	TG	triacyl	2438	M+NH4	TG(49:0)	(16:0_16:0_17:0)	(49:0)	820.752	23.72	C52 H100 O6	1	1	1	100	A	0.0213	0.0234	0.0212	0.0162	0.0179	0.018	0.0157	0.0166	0.0152	0.028	0.0264	0.0252	0.0338	0.0306	0.0271	0.0325	0.0284	0.0233	0.021	0.021	0.0252
TG(14:0_18:2_18:3)	TG	triacyl	2459	M+NH4	TG(50:5)	(14:0_18:2_18:3)	(50:5)	824.689	22.545	C53 H92 O6	2	1	2	100	A	0.1312	0.1208	0.1199	0.1361	0.1341	0.1149	0.1244	0.1113	0.1232	0.1204	0.1309	0.1301	0.1758	0.1536	0.1419	0.1394	0.1138	0.1062	0.1207	0.1362	0.1512
TG(14:0_18:2_18:2)	TG	triacyl	2474	M+NH4	TG(50:4)	(14:0_18:2_18:2)	(50:4)	826.705	22.766	C53 H94 O6	1	5	1	100	A	0.6739	0.6502	0.6257	0.5928	0.6366	0.5676	0.6276	0.6091	0.6145	0.6489	0.6435	0.6342	0.8421	0.7862	0.6898	0.7459	0.5748	0.5448	0.6427	0.6098	0.8047
TG(16:0_16:1_18:2)	TG	triacyl	2517	M+NH4	TG(50:3)	(16:0_16:1_18:2)	(50:3)	828.721	23.006	C53 H96 O6	2	3	1	100	A	1.944	1.8845	1.5135	1.7703	1.8229	1.7458	1.6745	1.5734	1.7159	1.6761	1.6532	1.67	2.0302	1.9517	1.6703	2.0898	1.5053	1.5877	1.6092	1.7099	1.9183
TG(16:0_16:1_18:1)	TG	triacyl	2543	M+NH4	TG(50:2)	(16:0_16:1_18:1)	(50:2)	830.736	23.309	C53 H98 O6	1	3	1	100	A	2.702	2.6708	2.5705	2.3521	2.4295	2.4562	2.2125	2.3941	2.4897	2.3469	2.1774	2.2079	2.553	2.6032	2.3293	3.024	2.5095	2.4453	2.3858	2.2691	2.4315
TG(16:0_16:0_18:1)	TG	triacyl	2557	M+NH4	TG(50:1)	(16:0_16:0_18:1)	(50:1)	832.752	23.576	C53 H100 O6	1	1	2	100	A	1.7406	1.6306	1.6403	1.4927	1.4501	1.3416	1.3474	1.3961	1.5357	1.5492	1.4475	1.4161	1.6941	1.4444	1.2345	1.8104	1.3746	1.474	1.4782	1.4179	1.4633
TG(16:0_16:0_18:0)	TG	triacyl	2561	M+NH4	TG(50:0)	(16:0_16:0_18:0)	(50:0)	834.768	23.878	C53 H102 O6	1	1	1	100	A	0.197	0.2081	0.1918	0.1204	0.116	0.1124	0.1216	0.1247	0.114	0.24	0.2069	0.2151	0.2315	0.2299	0.216	0.2406	0.2022	0.1727	0.139	0.1182	0.1809
TG(15:0_18:2_18:3)	TG	triacyl	2564	M+NH4	TG(51:5)	(15:0_18:2_18:3)	(51:5)	838.705	22.683	C54 H94 O6	1	2	2	66.7	A	0.0151	0.0148	0.0132	0.0135	0.0159	0.0143	0.0136	0.0144	0.0142	0.0158	0.0148	0.0162	0.0187	0.0169	0.0161	0.0156	0.0122	0.0123	0.015	0.0143	0.0167
TG(16:1_17:1_18:2)	TG	triacyl	2571	M+NH4	TG(51:4)	(16:1_17:1_18:2)	(51:4)	840.721	22.91	C54 H96 O6	1	1	1	100	A	0.0702	0.0647	0.0673	0.0689	0.0737	0.066	0.0657	0.0611	0.0678	0.074	0.0692	0.0757	0.0913	0.0778	0.0701	0.0825	0.0607	0.0591	0.0658	0.0669	0.0813
TG(16:1_17:1_18:1)	TG	triacyl	2588	M+NH4	TG(51:3)	(16:1_17:1_18:1)	(51:3)	842.736	23.161	C54 H98 O6	1	3	1	100	A	0.1511	0.1429	0.1411	0.1619	0.1609	0.1436	0.1443	0.141	0.1444	0.1713	0.1784	0.171	0.2088	0.2057	0.1853	0.1849	0.1325	0.1355	0.1666	0.1585	0.1826
TG(16:0_17:0_18:2)	TG	triacyl	2598	M+NH4	TG(51:2)	(16:0_17:0_18:2)	(51:2)	844.752	23.439	C54 H100 O6	2	2	1	100	A	0.1742	0.1704	0.1553	0.1722	0.1695	0.1704	0.1682	0.1555	0.1628	0.1979	0.1794	0.1766	0.2227	0.2088	0.1912	0.2063	0.1609	0.1567	0.1846	0.1825	0.21
TG(16:0_17:0_18:1)	TG	triacyl	2614	M+NH4	TG(51:1)	(16:0_17:0_18:1)	(51:1)	846.768	23.711	C54 H102 O6	1	1	1	100	A	0.0711	0.0662	0.0641	0.0627	0.0667	0.0562	0.061	0.0619	0.0658	0.0668	0.0671	0.0698	0.0864	0.0809	0.0707	0.0847	0.0667	0.059	0.0689	0.0686	0.0771
TG(16:2_18:2_18:3)	TG	triacyl	2621	M+NH4	TG(52:7)	(16:2_18:2_18:3)	(52:7)	848.689	22.367	C55 H92 O6	1	2	0	66.7	A	0.044	0.0419	0.0415	0.0383	0.0396	0.035	0.0391	0.0354	0.0396	0.0373	0.0369	0.0384	0.0463	0.0449	0.0406	0.0423	0.0342	0.0302	0.0395	0.037	0.0441
TG(16:0_17:0_18:0)	TG	triacyl	2636	M+NH4	TG(51:0)	(16:0_17:0_18:0)	(51:0)	848.783	24.018	C54 H104 O6	1	1	1	66.7	A	0.0088	0.0096	0.0082	0.006	0.0069	0.0071	0.0056	0.0065	0.0061	0.0124	0.0109	0.0109	0.0132	0.0128	0.0112	0.0117	0.0107	0.0093	0.0094	0.0083	0.01
TG(16:0_18:2_18:4)	TG	triacyl	2649	M+NH4	TG(52:6)	(16:0_18:2_18:4)	(52:6)	850.705	22.56	C55 H94 O6	1	5	1	100	A	0.2477	0.2256	0.2249	0.2345	0.2336	0.2083	0.2298	0.208	0.2315	0.2273	0.2276	0.2447	0.3128	0.2541	0.2446	0.2631	0.1948	0.1823	0.2149	0.2448	0.2644
TG(14:0_16:0_22:6)	TG	triacyl	2652	M+NH4	TG(52:6)	(14:0_16:0_22:6)	(52:6)	850.705	22.824	C55 H94 O6	1	5	1	100	A	0.0291	0.0242	0.0298	0.0224	0.0224	0.0248	0.0241	0.0214	0.0244	0.0266	0.0232	0.0242	0.0285	0.0258	0.0261	0.0279	0.0228	0.0199	0.0249	0.0246	0.0272
TG(16:1_18:2_18:2)	TG	triacyl	2657	M+NH4	TG(52:5)	(16:1_18:2_18:2)	(52:5)	852.721	22.803	C55 H96 O6	2	3	60	100	A	1.4197	1.3026	1.2743	1.2711	1.2879	1.228	1.2826	1.2851	1.2824	1.2741	1.1797	1.2404	1.5966	1.4101	1.3781	1.4861	1.1166	1.0754	1.2686	1.262	1.4926
TG(16:0_18:1_18:3)	TG	triacyl	2713	M+NH4	TG(52:4)	(16:0_18:1_18:3)	(52:4)	854.736	23.05	C55 H98 O6	1	6	2	100	A	3.8092	3.3567	3.5287	3.6891	3.6865	3.3283	3.5947	3.3521	3.6187	3.7886	3.3788	3.4189	4.0758	3.8872	3.4546	4.4191	3.4127	3.3764	3.4499	3.3015	4.0063
TG(16:0_18:1_18:2)	TG	triacyl	2758	M+NH4	TG(52:3)	(16:0_18:1_18:2)	(52:3)	856.752	23.301	C55 H100 O6	2	2	1	100	A	4.1591	3.9636	3.8782	3.4993	3.8138	3.8169	3.6186	3.4639	3.7067	3.4065	3.2052	3.2307	3.9563	3.6852	3.2469	4.6744	3.6774	3.5444	3.5481	3.3748	3.7448
TG(16:0_18:0_18:2)	TG	triacyl	2766	M+NH4	TG(52:2)	(16:0_18:0_18:2)	(52:2)	858.768	23.57	C55 H102 O6	1	2	1	100	A	2.7557	2.5853	2.6539	2.4284	2.4744	2.1821	2.3456	2.3531	2.4065	2.4502	2.3163	2.3261	2.8336	2.6123	2.1599	2.9285	2.1909	2.3953	2.4919	2.3595	2.6939
TG(16:0_18:0_18:1)	TG	triacyl	2772	M+NH4	TG(52:1)	(16:0_18:0_18:1)	(52:1)	860.783	23.87	C55 H104 O6	2	1	1	100	A	0.578	0.5838	0.5384	0.553	0.514	0.4618	0.5281	0.5047	0.501	0.6309	0.5656	0.5967	0.6773	0.6641	0.6038	0.7173	0.5178	0.5013	0.5229	0.5054	0.6668
TG(17:1_18:2_18:3)	TG	triacyl	2781	M+NH4	TG(53:6)	(17:1_18:2_18:3)	(53:6)	864.721	22.694	C56 H96 O6	1	4	2	100	B	0.0146	0.0126	0.0133	0.0123	0.0118	0.0121	0.0132	0.0125	0.0119	0.0149	0.0134	0.0144	0.0161	0.0151	0.015	0.0119	0.008	0.0075	0.0102	0.0133	0.0146
TG(17:1_18:2_18:2)	TG	triacyl	2790	M+NH4	TG(53:5)	(17:1_18:2_18:2)	(53:5)	866.736	22.923	C56 H98 O6	1	3	1	66.7	A	0.0531	0.0523	0.0533	0.0531	0.0522	0.0483	0.0497	0.0461	0.0543	0.0541	0.0549	0.0585	0.0736	0.0564	0.0542	0.0643	0.0463	0.0463	0.0496	0.0482	0.0635
TG(16:0_17:0_20:4)	TG	triacyl	2801	M+NH4	TG(53:4)	(16:0_17:0_20:4)	(53:4)	868.752	23.378	C56 H100 O6	1	4	1	100	A	0.0044	0.0042	0.0038	0.0037	0.006	0.0032	0.0046	0.0035	0.0039	0.0042	0.0053	0.004	0.0029	0.0039	0.005	0.006	0.0055	0.0037	0.0043	0.0065	0.0053
TG(17:0_18:1_18:2)	TG	triacyl	2831	M+NH4	TG(53:3)	(17:0_18:1_18:2)	(53:3)	870.768	23.441	C56 H102 O6	2	2	1	100	A	0.1669	0.1603	0.1691	0.1727	0.1706	0.1699	0.1711	0.155	0.1606	0.1788	0.1707	0.1683	0.2118	0.2058	0.1848	0.1991	0.1511	0.1533	0.1763	0.174	0.206
TG(16:0_19:0_18:2)	TG	triacyl	2809	M+NH4	TG(53:2)	(16:0_19:0_18:2)	(53:2)	872.783	23.717	C56 H104 O6	2	2	1	66.7	A	0.0972	0.088	0.0883	0.0883	0.0939	0.0875	0.088	0.0849	0.0904	0.0923	0.0861	0.0822	0.1189	0.1099	0.0978	0.1158	0.0869	0.0825	0.0938	0.0982	0.1049
TG(18:2_18:3_18:3)	TG	triacyl	2819	M+NH4	TG(54:8)	(18:2_18:3_18:3)	(54:8)	874.705	22.393	C57 H94 O6	2	5	3	100	A	0.1062	0.0978	0.0964	0.0913	0.0958	0.0843	0.0968	0.0893	0.0981	0.0867	0.0913	0.0928	0.1182	0.1073	0.0957	0.1044	0.0831	0.0731	0.091	0.0934	0.1101
TG(16:1_18:2_20:4)	TG	triacyl	2835	M+NH4	TG(54:7)	(16:1_18:2_20:4)	(54:7)	876.721	22.608	C57 H96 O6	1	3	1	100	A	0.4123	0.397	0.3926	0.4	0.4245	0.3601	0.4412	0.4023	0.4217	0.4708	0.4	0.4543	0.5656	0.4881	0.4618	0.4793	0.351	0.3155	0.4792	0.4224	0.4969
TG(18:1_18:2_18:3)	TG	triacyl	2851	M+NH4	TG(54:6)	(18:1_18:2_18:3)	(54:6)	878.736	22.821	C57 H98 O6	2	8	2	100	A	1.6432	1.5557	1.4759	1.3762	1.4839	1.3651	1.7429	1.4355	1.53	1.452	1.3497	1.4141	1.7942	1.5726	1.5338	1.7391	1.304	1.2476	1.5103	1.4223	1.7363
TG(18:0_18:2_18:3)	TG	triacyl	2885	M+NH4	TG(54:5)	(18:0_18:2_18:3)	(54:5)	880.752	23.052	C57 H100 O6	1	5	2	100	A	2.4042	2.1144	2.4456	2.3706	2.3587	2.3273	2.4616	2.2775	2.6062	2.3664	2.1529	2.1902	2.6502	2.4891	2.2445	2.9015	2.2713	2.0773	2.3186	2.2062	2.658
TG(18:1_18:1_18:2)	TG	triacyl	2918	M+NH4	TG(54:4)	(18:1_18:1_18:2)	(54:4)	882.768	23.32	C57 H102 O6	2	4	1	100	A	2.3618	2.1658	2.1704	2.0255	2.0938	2.0971	2.2465	1.9858	2.2232	1.9199	1.8155	1.768	2.3071	2.0665	1.9293	2.6358	2.0728	1.9663	2.0627	2.048	2.1511
TG(18:0_18:2_18:2)	TG	triacyl	2920	M+NH4	TG(54:4)	(18:0_18:2_18:2)	(54:4)	882.768	23.515	C57 H102 O6	1	4	1	66.7	A	0.1088	0.1059	0.0941	0.1186	0.1042	0.1121	0.0931	0.0879	0.0951	0.1047	0.1197	0.1078	0.1217	0.1264	0.1178	0.1214	0.0986	0.076	0.0957	0.1172	0.134
TG(18:0_18:1_18:2)	TG	triacyl	2935	M+NH4	TG(54:3)	(18:0_18:1_18:2)	(54:3)	884.783	23.58	C57 H104 O6	2	3	1	100	A	1.6001	1.531	1.5545	1.4536	1.5011	1.3453	1.7041	1.6696	1.7409	1.4444	1.3609	1.3874	1.6452	1.6221	1.4593	1.7464	1.1838	1.4137	1.5726	1.4859	1.8676
TG(18:0_18:0_18:2)	TG	triacyl	2939	M+NH4	TG(54:2)	(18:0_18:0_18:2)	(54:2)	886.799	23.861	C57 H106 O6	2	4	1	100	A	0.5261	0.5382	0.514	0.5463	0.5305	0.4839	0.5626	0.4986	0.5035	0.5249	0.4841	0.5267	0.6158	0.5978	0.5522	0.6413	0.4644	0.4747	0.5096	0.5562	0.6336
TG(16:0_18:2_21:5)	TG	triacyl	2948	M+NH4	TG(55:7)	(16:0_18:2_21:5)	(55:7)	890.736	22.852	C58 H98 O6	1	2	0	66.7	A	0.0191	0.0189	0.0195	0.0167	0.0195	0.0181	0.0167	0.0183	0.0172	0.0177	0.0174	0.0189	0.0215	0.0198	0.0175	0.0202	0.0166	0.0137	0.0187	0.018	0.0212
TG(16:0_18:0_20:0)	TG	triacyl	2957	M+NH4	TG(54:0)	(16:0_18:0_20:0)	(54:0)	890.83	24.492	C57 H110 O6	1	2	1	100	A	0.0082	0.0086	0.0087	0.0041	0.0065	0.0051	0.1729	0.1833	0.1587	0.0084	0.0072	0.0075	0.0973	0.1059	0.0981	0.0082	0.0068	0.0065	0.0413	0.0408	0.0446
TG(O-16:0_18:1_22:5)	TG	alkyl-acyl	2964	M+NH4	TG(O-56:6)	(O-16:0_18:1_22:5)	(O-56:6)	892.788	23.662	C59 H104 O5	1	3	0	100	B	0.0136	0.0128	0.0119	0.0128	0.0143	0.0119	0.0128	0.0141	0.0143	0.0155	0.0119	0.0119	0.0182	0.02	0.0204	0.0157	0.0139	0.0148	0.014	0.0162	0.0223
TG(17:0_18:1_20:4)	TG	triacyl	2967	M+NH4	TG(55:5)	(17:0_18:1_20:4)	(55:5)	894.768	23.364	C58 H102 O6	1	1	1	100	A	0.0068	0.0071	0.0075	0.006	0.007	0.0068	0.0078	0.0052	0.0073	0.008	0.0066	0.0059	0.0081	0.0088	0.0073	0.0085	0.0066	0.0049	0.0062	0.0078	0.0085
TG(17:0_18:0_20:4)	TG	triacyl	2969	M+NH4	TG(55:4)	(17:0_18:0_20:4)	(55:4)	896.783	23.67	C58 H104 O6	1	3	1	66.7	A	0.0034	0.0049	0.0052	0.0046	0.0062	0.0057	0.0053	0.0045	0.0058	0.0056	0.0051	0.0046	0.0052	0.0068	0.0059	0.0072	0.0048	0.0041	0.005	0.0048	0.0057
TG(18:2_18:3_20:5)	TG	triacyl	2975	M+NH4	TG(56:10)	(18:2_18:3_20:5)	(56:10)	898.705	22.33	C59 H94 O6	1	3	2	100	A	0.0191	0.016	0.02	0.0168	0.0172	0.0181	0.0185	0.0169	0.0191	0.0154	0.0146	0.0158	0.0196	0.0176	0.0163	0.0183	0.0146	0.0141	0.0164	0.0167	0.0195
TG(16:0_20:5_20:5)	TG	triacyl	2976	M+NH4	TG(56:10)	(16:0_20:5_20:5)	(56:10)	898.705	22.468	C59 H94 O6	1	3	1	66.7	A	0.0233	0.0211	0.0246	0.021	0.0226	0.0216	0.0222	0.0214	0.023	0.0192	0.0194	0.0191	0.0245	0.0214	0.0203	0.0226	0.0176	0.0173	0.0202	0.0209	0.0234
TG(19:0_18:1_18:2)	TG	triacyl	2977	M+NH4	TG(55:3)	(19:0_18:1_18:2)	(55:3)	898.799	23.731	C58 H106 O6	1	1	1	100	A	0.0437	0.0464	0.045	0.0423	0.0469	0.0453	0.0452	0.0428	0.0469	0.0452	0.0438	0.042	0.0559	0.0541	0.0463	0.0591	0.0408	0.0407	0.0462	0.0461	0.0537
TG(16:1_18:2_22:6)	TG	triacyl	2982	M+NH4	TG(56:9)	(16:1_18:2_22:6)	(56:9)	900.721	22.532	C59 H96 O6	1	3	1	100	A	0.1584	0.1632	0.1624	0.153	0.1587	0.1536	0.1519	0.1456	0.1531	0.1653	0.16	0.1749	0.2016	0.1778	0.167	0.1637	0.1357	0.1178	0.1583	0.1626	0.1787
TG(16:0_18:2_22:6)	TG	triacyl	2987	M+NH4	TG(56:8)	(16:0_18:2_22:6)	(56:8)	902.736	22.854	C59 H98 O6	2	2	1	100	A	0.3193	0.3451	0.3237	0.3293	0.3281	0.3111	0.3096	0.3302	0.3061	0.3376	0.297	0.3233	0.4152	0.3345	0.3306	0.3476	0.2848	0.2507	0.3242	0.3088	0.373
TG(18:1_18:2_20:4)	TG	triacyl	2997	M+NH4	TG(56:7)	(18:1_18:2_20:4)	(56:7)	904.752	22.958	C59 H100 O6	2	5	1	66.7	B	0.347	0.3558	0.3601	0.342	0.3647	0.3135	0.3289	0.3086	0.3422	0.3821	0.3333	0.3036	0.3628	0.3807	0.3352	0.38	0.3015	0.2795	0.331	0.356	0.4048
TG(16:0_18:1_22:6)	TG	triacyl	2998	M+NH4	TG(56:7)	(16:0_18:1_22:6)	(56:7)	904.752	23.095	C59 H100 O6	1	5	1	66.7	A	0.2563	0.2981	0.2632	0.273	0.2691	0.2586	0.2614	0.2409	0.2716	0.2659	0.2792	0.2692	0.3243	0.2761	0.2536	0.2805	0.253	0.2093	0.2401	0.2547	0.3111
TG(16:0_18:2_22:4)	TG	triacyl	3001	M+NH4	TG(56:6)	(16:0_18:2_22:4)	(56:6)	906.768	23.201	C59 H102 O6	1	4	1	100	A	0.3992	0.4276	0.3804	0.4142	0.4173	0.4036	0.3688	0.3715	0.3996	0.4425	0.4227	0.3862	0.4812	0.4475	0.4108	0.4392	0.3683	0.3497	0.4016	0.3993	0.4832
TG(16:0_18:0_22:6)	TG	triacyl	3002	M+NH4	TG(56:6)	(16:0_18:0_22:6)	(56:6)	906.768	23.403	C59 H102 O6	1	4	1	66.7	A	0.0781	0.0908	0.0779	0.0816	0.0772	0.0774	0.0746	0.0688	0.0734	0.0738	0.0792	0.0773	0.0999	0.0926	0.0819	0.0937	0.0739	0.0661	0.0808	0.0824	0.0936
TG(16:0_18:1_22:4)	TG	triacyl	3006	M+NH4	TG(56:5)	(16:0_18:1_22:4)	(56:5)	908.783	23.5	C59 H104 O6	2	3	1	66.7	A	0.1477	0.1697	0.1513	0.154	0.1652	0.1416	0.1553	0.1432	0.1532	0.1673	0.1644	0.14	0.1904	0.1909	0.1623	0.1841	0.1357	0.1089	0.1383	0.151	0.2149
TG(16:0_18:0_22:4)	TG	triacyl	3011	M+NH4	TG(56:4)	(16:0_18:0_22:4)	(56:4)	910.799	23.59	C59 H106 O6	1	4	1	66.7	A	0.1923	0.1987	0.188	0.1759	0.1905	0.1712	0.1934	0.1832	0.2036	0.1744	0.1822	0.1691	0.192	0.1725	0.1631	0.2025	0.1527	0.1634	0.1953	0.1769	0.1955
TG(18:0_18:0_20:4)	TG	triacyl	3012	M+NH4	TG(56:4)	(18:0_18:0_20:4)	(56:4)	910.799	23.808	C59 H106 O6	1	4	1	66.7	A	0.0507	0.0598	0.0525	0.0537	0.0549	0.0561	0.0545	0.0514	0.0493	0.0563	0.0517	0.0516	0.0618	0.064	0.0612	0.0587	0.0501	0.0448	0.0512	0.0586	0.0658
TG(18:0_20:1_18:2)	TG	triacyl	3017	M+NH4	TG(56:3)	(18:0_20:1_18:2)	(56:3)	912.815	23.85	C59 H108 O6	1	2	1	66.7	A	0.1275	0.1352	0.1253	0.1293	0.1406	0.1166	0.1571	0.1442	0.1444	0.1313	0.1271	0.1235	0.1549	0.1615	0.1435	0.1538	0.1189	0.1129	0.1351	0.1418	0.1613
TG(18:2_18:2_21:5)	TG	triacyl	3018	M+NH4	TG(57:9)	(18:2_18:2_21:5)	(57:9)	914.736	22.612	C60 H98 O6	1	1	0	100	A	0.0038	0.0034	0.004	0.0037	0.0042	0.0039	0.0037	0.0031	0.0038	0.0046	0.0035	0.0049	0.0046	0.0053	0.0043	0.0056	0.0029	0.0032	0.0051	0.0038	0.0047
TG(18:1_18:2_21:5)	TG	triacyl	3022	M+NH4	TG(57:8)	(18:1_18:2_21:5)	(57:8)	916.752	22.847	C60 H100 O6	1	1	0	100	A	0.0139	0.0117	0.0117	0.0121	0.0111	0.0119	0.0101	0.0118	0.0112	0.0137	0.0116	0.0122	0.0163	0.0129	0.0123	0.0128	0.0101	0.0105	0.0114	0.0114	0.0132
TG(17:0_18:2_22:5)	TG	triacyl	3029	M+NH4	TG(57:7)	(17:0_18:2_22:5)	(57:7)	918.768	23.113	C60 H102 O6	1	2	1	66.7	A	0.0117	0.0119	0.0126	0.0111	0.0123	0.0106	0.0115	0.0091	0.0106	0.0117	0.0117	0.0124	0.0156	0.0121	0.0138	0.0156	0.0117	0.0091	0.013	0.0103	0.0157
TG(16:0_18:0_22:0)	TG	triacyl	3033	M+NH4	TG(56:0)	(16:0_18:0_22:0)	(56:0)	918.862	24.838	C59 H114 O6	1	1	1	66.7	A	0.002	0.0027	0.0025	0.0014	0.0022	0.0019	0.0046	0.0049	0.0048	0.0028	0.0032	0.0025	0.0042	0.0047	0.0045	0.0026	0.0022	0.0018	0.0027	0.0024	0.0029
TG(19:0_18:2_20:4)	TG	triacyl	3037	M+NH4	TG(57:6)	(19:0_18:2_20:4)	(57:6)	920.783	23.388	C60 H104 O6	1	3	1	100	A	0.0077	0.0074	0.0073	0.0073	0.0061	0.0081	0.0061	0.0069	0.0058	0.0065	0.0071	0.0064	0.0065	0.0078	0.006	0.007	0.006	0.0058	0.0055	0.0071	0.0071
TG(18:2_20:5_20:5)	TG	triacyl	3041	M+NH4	TG(58:12)	(18:2_20:5_20:5)	(58:12)	922.705	22.235	C61 H94 O6	1	1	1	100	A	0.0095	0.0103	0.0106	0.0105	0.0111	0.0102	0.0102	0.0103	0.0113	0.0097	0.0101	0.0104	0.0122	0.0111	0.0117	0.0083	0.0079	0.0078	0.0099	0.0109	0.0108
TG(18:2_18:3_22:6)	TG	triacyl	3049	M+NH4	TG(58:11)	(18:2_18:3_22:6)	(58:11)	924.721	22.424	C61 H96 O6	2	2	2	100	A	0.0411	0.0438	0.0417	0.0372	0.0406	0.0416	0.0372	0.0367	0.0396	0.0382	0.0396	0.0391	0.0495	0.0434	0.0419	0.0438	0.0355	0.0303	0.0403	0.0377	0.0451
TG(16:0_20:4_22:6)	TG	triacyl	3061	M+NH4	TG(58:10)	(16:0_20:4_22:6)	(58:10)	926.736	22.622	C61 H98 O6	1	4	1	100	A	0.1226	0.1484	0.1318	0.144	0.1512	0.1358	0.133	0.1298	0.1252	0.1618	0.1548	0.1641	0.195	0.1695	0.1567	0.179	0.124	0.1025	0.1545	0.1461	0.1701
TG(18:1_18:2_22:6)	TG	triacyl	3068	M+NH4	TG(58:9)	(18:1_18:2_22:6)	(58:9)	928.752	22.859	C61 H100 O6	1	2	1	100	A	0.2326	0.2511	0.2449	0.2395	0.2438	0.2338	0.2322	0.2449	0.2328	0.2579	0.2287	0.233	0.3012	0.2434	0.2272	0.2352	0.2035	0.1838	0.2443	0.2376	0.2702
TG(18:0_18:2_22:6)	TG	triacyl	3075	M+NH4	TG(58:8)	(18:0_18:2_22:6)	(58:8)	930.768	23.131	C61 H102 O6	1	3	1	100	A	0.1903	0.2146	0.1918	0.2029	0.2141	0.2098	0.2064	0.1926	0.1945	0.2008	0.2033	0.1981	0.2473	0.2144	0.2192	0.2303	0.1759	0.1661	0.199	0.1958	0.2265
TG(18:0_18:2_22:5)	TG	triacyl	3084	M+NH4	TG(58:7)	(18:0_18:2_22:5)	(58:7)	932.783	23.383	C61 H104 O6	1	2	1	66.7	A	0.0787	0.0857	0.0795	0.0804	0.0776	0.073	0.0732	0.0638	0.0753	0.0645	0.0725	0.068	0.0892	0.0828	0.0773	0.0897	0.0666	0.0692	0.0726	0.0822	0.0903
TG(18:0_18:1_22:5)	TG	triacyl	3088	M+NH4	TG(58:6)	(18:0_18:1_22:5)	(58:6)	934.799	23.485	C61 H106 O6	1	4	1	100	A	0.1043	0.1265	0.116	0.1151	0.1244	0.1187	0.1146	0.105	0.1095	0.1249	0.1092	0.1128	0.1428	0.1337	0.1237	0.1303	0.0993	0.0944	0.1143	0.1138	0.1399
TG(18:0_18:0_22:6)	TG	triacyl	3091	M+NH4	TG(58:6)	(18:0_18:0_22:6)	(58:6)	934.799	23.69	C61 H106 O6	1	4	1	100	A	0.0147	0.0162	0.0169	0.0153	0.0154	0.015	0.0136	0.0157	0.0157	0.0164	0.0162	0.0145	0.0215	0.02	0.0159	0.0173	0.0144	0.0132	0.0163	0.0153	0.0181
TG(22:0_18:1_18:2)	TG	triacyl	3208	M+NH4	TG(58:3)	(22:0_18:1_18:2)	(58:3)	940.846	24.127	C61 H112 O6	1	1	1	66.7	A	0.0215	0.0204	0.021	0.0215	0.0199	0.0215	0.0247	0.0247	0.0221	0.0187	0.02	0.0179	0.0266	0.0231	0.0215	0.0266	0.0169	0.0186	0.0198	0.022	0.0237
TG(16:0_18:1_24:1)	TG	triacyl	3099	M+NH4	TG(58:2)	(16:0_18:1_24:1)	(58:2)	942.862	24.462	C61 H114 O6	1	1	0	100	B	0.0134	0.014	0.0136	0.01	0.0118	0.0115	0.0163	0.0189	0.0165	0.0122	0.0132	0.0124	0.0171	0.0177	0.0145	0.0163	0.0124	0.0122	0.0137	0.015	0.016
TG(16:0_24:0_18:1)	TG	triacyl	3103	M+NH4	TG(58:1)	(16:0_24:0_18:1)	(58:1)	944.877	24.815	C61 H116 O6	1	1	0	100	B	0.0037	0.0043	0.0037	0.0025	0.0029	0.0028	0.0033	0.0043	0.0035	0.0036	0.0039	0.0038	0.0048	0.005	0.0049	0.0043	0.0038	0.0034	0.0035	0.0032	0.004
TG(18:2_20:5_22:6)	TG	triacyl	3108	M+NH4	TG(60:13)	(18:2_20:5_22:6)	(60:13)	948.721	22.337	C63 H96 O6	1	1	1	100	A	0.0165	0.019	0.0186	0.0151	0.0169	0.0125	0.0156	0.0152	0.0169	0.0128	0.0143	0.0143	0.018	0.0159	0.0146	0.0165	0.0138	0.0126	0.0156	0.0154	0.0186
TG(16:0_22:6_22:6)	TG	triacyl	3114	M+NH4	TG(60:12)	(16:0_22:6_22:6)	(60:12)	950.736	22.654	C63 H98 O6	1	4	1	100	A	0.0263	0.0342	0.0335	0.0311	0.0325	0.0296	0.0296	0.0279	0.0302	0.0356	0.0332	0.0351	0.0408	0.0264	0.0359	0.0272	0.0292	0.0231	0.0316	0.0334	0.0413
TG(16:0_22:5_22:6)	TG	triacyl	3120	M+NH4	TG(60:11)	(16:0_22:5_22:6)	(60:11)	952.752	22.765	C63 H100 O6	1	2	1	66.7	B	0.0419	0.0415	0.0385	0.0363	0.0373	0.0326	0.0352	0.0358	0.0357	0.0339	0.034	0.0354	0.0433	0.0407	0.0407	0.0387	0.0286	0.029	0.0366	0.0342	0.0469
TG(16:0_22:4_22:6)	TG	triacyl	3123	M+NH4	TG(60:10)	(16:0_22:4_22:6)	(60:10)	954.768	23.051	C63 H102 O6	1	2	1	66.7	B	0.0368	0.041	0.0506	0.0386	0.0387	0.0493	0.0365	0.0375	0.0438	0.0397	0.0398	0.037	0.0442	0.0449	0.039	0.0473	0.0381	0.0354	0.0403	0.0362	0.0482
TG(23:0_18:1_18:2)	TG	triacyl	3125	M+NH4	TG(59:3)	(23:0_18:1_18:2)	(59:3)	954.862	24.33	C62 H114 O6	1	1	0	66.7	A	0.0042	0.0039	0.0034	0.0034	0.0038	0.0032	0.0037	0.0042	0.0041	0.004	0.0038	0.0036	0.0048	0.0049	0.0039	0.0041	0.0033	0.0033	0.0039	0.0044	0.005
TG(18:0_20:3_22:5)	TG	triacyl	3126	M+NH4	TG(60:8)	(18:0_20:3_22:5)	(60:8)	958.799	23.174	C63 H106 O6	1	3	1	66.7	A	0.0199	0.0241	0.0257	0.0216	0.0195	0.0218	0.0201	0.0231	0.0229	0.0297	0.0211	0.0223	0.0288	0.0282	0.0229	0.0254	0.0203	0.0181	0.0224	0.0221	0.0236
TG(18:1_18:1_24:1)	TG	triacyl	3139	M+NH4	TG(60:3)	(18:1_18:1_24:1)	(60:3)	968.877	24.487	C63 H116 O6	1	2	0	66.7	A	0.009	0.01	0.0099	0.0084	0.01	0.0092	0.012	0.0126	0.0123	0.009	0.0085	0.0089	0.0118	0.0117	0.0099	0.0109	0.0088	0.0082	0.0101	0.0098	0.0123
TG(18:2_22:6_22:6)	TG	triacyl	3146	M+NH4	TG(62:14)	(18:2_22:6_22:6)	(62:14)	974.736	22.425	C65 H98 O6	1	1	1	100	A	0.0213	0.0256	0.0244	0.02	0.0218	0.0226	0.0207	0.0204	0.0216	0.0185	0.0212	0.0206	0.0263	0.0228	0.0221	0.0218	0.0187	0.0168	0.0214	0.0197	0.0228
TG(18:2_22:5_22:6)	TG	triacyl	3150	M+NH4	TG(62:13)	(18:2_22:5_22:6)	(62:13)	976.752	22.535	C65 H100 O6	1	2	1	66.7	A	0.0088	0.0103	0.0098	0.0093	0.0109	0.0076	0.008	0.0091	0.0099	0.0101	0.009	0.0113	0.0139	0.0127	0.0079	0.0101	0.0076	0.0075	0.0103	0.0091	0.01
TG(18:2_22:4_22:6)	TG	triacyl	3158	M+NH4	TG(62:12)	(18:2_22:4_22:6)	(62:12)	978.768	22.747	C65 H102 O6	1	3	1	100	A	0.0191	0.0273	0.0221	0.0196	0.023	0.021	0.0227	0.0204	0.0225	0.0247	0.0213	0.0199	0.0244	0.0208	0.0231	0.0226	0.0183	0.016	0.0209	0.0206	0.0281
TG(18:0_22:6_22:6)	TG	triacyl	3159	M+NH4	TG(62:12)	(18:0_22:6_22:6)	(62:12)	978.768	22.948	C65 H102 O6	1	3	1	100	A	0.0107	0.0131	0.0124	0.0156	0.0163	0.0156	0.0093	0.0128	0.0122	0.0133	0.0127	0.0137	0.02	0.0174	0.0124	0.0122	0.0102	0.0102	0.0112	0.0165	0.0152
TG(18:0_22:4_22:6)	TG	triacyl	3167	M+NH4	TG(62:10)	(18:0_22:4_22:6)	(62:10)	982.799	23.171	C65 H106 O6	1	1	1	100	B	0.028	0.0334	0.0321	0.0296	0.0245	0.0318	0.028	0.0299	0.0228	0.0296	0.0266	0.0304	0.0357	0.0327	0.0277	0.0294	0.0271	0.0234	0.0286	0.0255	0.032
TG(18:0_22:4_22:5)	TG	triacyl	3170	M+NH4	TG(62:9)	(18:0_22:4_22:5)	(62:9)	984.815	23.358	C65 H108 O6	1	2	1	66.7	A	0.0135	0.0147	0.0165	0.0131	0.0137	0.0141	0.013	0.0141	0.0135	0.0146	0.0138	0.0112	0.0151	0.0151	0.0132	0.0157	0.0134	0.0126	0.0158	0.0148	0.0162
TG(20:4_22:5_22:6)	TG	triacyl	3226	M+NH4	TG(64:15)	(20:4_22:5_22:6)	(64:15)	1000.75	22.459	C67 H100 O6	1	1	1	66.7	A	0.0033	0.0031	0.004	0.0033	0.0032	0.0035	0.0035	0.0035	0.0038	0.0036	0.0039	0.0036	0.0043	0.0039	0.0033	0.0025	0.0024	0.0025	0.0041	0.004	0.0041

## Sheet: Brain
Table S3: Characterization and quantification of mouse brain lipidome using the six tested extraction methods																Conc (uM)
LipidMolec	ClassKey	SubClassKey	LipidSearch ID	Adduct	LipidMolecGroup	LipidMolecGroup	FAKey	FAGroupKey	CalcMass	BaseRt	MolFormula	IonCnt	IsoCnt	PDBCnt	TotalSmpIDRate(%)	TotalGrade	Brn_IPA_S1	Brn_IPA_S2	Brn_IPA_S3	Brn_MMC_S1	Brn_MMC_S2	Brn_MMC_S3	Brn_EE_S1	Brn_EE_S2	Brn_EE_S3	Brn_Folch_S1	Brn_Folch_S2	Brn_Folch_S3	Brn_BuME_S1	Brn_BuME_S2	Brn_BuME_S3	Brn_MTBE_S1	Brn_MTBE_S2	Brn_MTBE_S3	Brn_pooled_p01	Brn_pooled_p02	Brn_pooled_p03
AcCa(8:0)	AcCa	Fatty acyl carnitines	11	M+H	AcCa(8:0)	AcCa(8:0)	(8:0)	(8:0)	287.21	2.031	C15 H29 N1 O4	1	1	0	66.7	A	0.0575	0.0538	0.0584	0.091	0.0823	0.1185	0.2137	0.1836	0.1923	0.0769	0.074	0.0663	0.2179	0.2582	0.2493	0.0651	0.0475	0.0243	0.064	0.0502	0.0551
AcCa(14:0)	AcCa	Fatty acyl carnitines	17	M+H	AcCa(14:0)	AcCa(14:0)	(14:0)	(14:0)	371.304	4.468	C21 H41 N1 O4	1	1	0	100	A	0.3372	0.3563	0.3244	0.3159	0.2985	0.3268	0.4377	0.392	0.4606	0.2319	0.2337	0.2234	0.2913	0.3721	0.3397	0.2635	0.2736	0.214	0.3702	0.3886	0.3162
AcCa(16:1)	AcCa	Fatty acyl carnitines	20	M+H	AcCa(16:1)	AcCa(16:1)	(16:1)	(16:1)	397.319	4.757	C23 H43 N1 O4	1	1	0	100	A	0.1238	0.1553	0.1397	0.1401	0.1125	0.124	0.1705	0.1586	0.1928	0.0968	0.103	0.1123	0.148	0.1738	0.1652	0.1114	0.1266	0.1062	0.1724	0.198	0.1695
AcCa(16:0)	AcCa	Fatty acyl carnitines	23	M+H	AcCa(16:0)	AcCa(16:0)	(16:0)	(16:0)	399.335	5.458	C23 H45 N1 O4	1	1	0	100	A	1.0396	1.0774	1.0469	0.995	0.9365	1.0044	1.343	1.2939	1.657	0.8227	0.7692	0.7297	0.815	1.0282	0.9873	1.1401	1.2247	0.9012	1.3704	1.423	1.0297
AcCa(18:2)	AcCa	Fatty acyl carnitines	26	M+H	AcCa(18:2)	AcCa(18:2)	(18:2)	(18:2)	423.335	5.044	C25 H45 N1 O4	1	1	0	100	A	0.0365	0.0549	0.0454	0.0504	0.0424	0.0477	0.0669	0.0706	0.0872	0.0393	0.0339	0.0326	0.0502	0.0499	0.04	0.0475	0.0587	0.0357	0.0626	0.068	0.0436
AcCa(18:1)	AcCa	Fatty acyl carnitines	28	M+H	AcCa(18:1)	AcCa(18:1)	(18:1)	(18:1)	425.351	5.63	C25 H47 N1 O4	1	1	0	100	A	0.6919	0.7682	0.6994	0.7195	0.6965	0.7214	0.9843	0.9212	1.09	0.5829	0.5874	0.551	0.6613	0.8629	0.7231	0.7744	0.9083	0.6388	0.9053	1.0588	0.8964
AcCa(18:0)	AcCa	Fatty acyl carnitines	31	M+H	AcCa(18:0)	AcCa(18:0)	(18:0)	(18:0)	427.366	6.434	C25 H49 N1 O4	1	1	0	100	A	0.3571	0.383	0.3198	0.3353	0.3243	0.3435	0.5303	0.4905	0.6274	0.3295	0.3238	0.2576	0.3964	0.5106	0.4229	0.5089	0.4608	0.3742	0.4847	0.5779	0.4359
AcCa(20:4)	AcCa	Fatty acyl carnitines	33	M+H	AcCa(20:4)	AcCa(20:4)	(20:4)	(20:4)	447.335	4.988	C27 H45 N1 O4	1	1	0	100	A	0.3231	0.3696	0.3216	0.3244	0.2917	0.3121	0.4369	0.3592	0.4546	0.253	0.2602	0.2461	0.2975	0.3558	0.3055	0.335	0.3704	0.2567	0.3887	0.4396	0.3338
AcCa(20:1)	AcCa	Fatty acyl carnitines	35	M+H	AcCa(20:1)	AcCa(20:1)	(20:1)	(20:1)	453.382	6.549	C27 H51 N1 O4	1	1	0	100	A	0.0689	0.0736	0.0713	0.0606	0.0635	0.0777	0.0979	0.0986	0.1158	0.0707	0.0607	0.0625	0.068	0.1096	0.0671	0.0922	0.1015	0.0762	0.1029	0.1125	0.0916
AcCa(22:4)	AcCa	Fatty acyl carnitines	36	M+H	AcCa(22:4)	AcCa(22:4)	(22:4)	(22:4)	475.366	5.625	C29 H49 N1 O4	1	1	0	100	A	0.0663	0.0801	0.0658	0.0654	0.0666	0.074	0.1031	0.0896	0.1258	0.0694	0.0565	0.0662	0.0679	0.0892	0.0827	0.0957	0.1098	0.0688	0.0884	0.0969	0.0891
AEA(13:0)	AEA	N-acyl ethanolamines	1	M+H	AEA(13:0)	AEA(13:0)	(13:0)	(13:0)	257.235	5.308	C15 H31 N1 O2	1	1	0	100	C	0.0046	0.0029	0.005	0.0128	0.0147	0.0133	0.0128	0.0123	0.0101	0.0805	0.0771	0.0856	0.0272	0.0273	0.0224	0.0325	0.0286	0.0278	0.0237	0.0275	0.0272
AEA(16:1)	AEA	N-acyl ethanolamines	10	M+H	AEA(16:1)	AEA(16:1)	(16:1)	(16:1)	297.267	7.485	C18 H35 N1 O2	1	1	0	100	C	0.0109	0.0235	0.0048	0.0068	0.0194	0.0103	0.0137	0.0022	0.0355	0.0294	0.0195	0.0166	0.0213	0.0105	0.0056	0.0082	0.0269	0.0157	0.0164	0.0171	0.0197
AEA(16:0)	AEA	N-acyl ethanolamines	13	M+H	AEA(16:0)	AEA(16:0)	(16:0)	(16:0)	299.282	6.876	C18 H37 N1 O2	1	1	0	100	B	0.0528	0.0557	0.0471	0.0372	0.0409	0.041	0.0424	0.0381	0.0437	0.0433	0.0394	0.042	0.0483	0.0472	0.0462	0.0547	0.0498	0.053	0.0491	0.0519	0.055
AEA(18:2)	AEA	N-acyl ethanolamines	16	M+H	AEA(18:2)	AEA(18:2)	(18:2)	(18:2)	323.282	6.274	C20 H37 N1 O2	1	1	1	100	B	0.0099	0.0098	0.0097	0.0087	0.0102	0.0093	0.0076	0.0074	0.0086	0.0124	0.0103	0.0113	0.0102	0.0101	0.0117	0.0114	0.0086	0.0098	0.0103	0.0121	0.011
AEA(18:1)	AEA	N-acyl ethanolamines	18	M+H	AEA(18:1)	AEA(18:1)	(18:1)	(18:1)	325.298	7.127	C20 H39 N1 O2	1	1	0	100	B	0.0391	0.0364	0.0377	0.0328	0.0364	0.0337	0.0314	0.0333	0.0351	0.0372	0.033	0.0355	0.0379	0.0393	0.0366	0.0388	0.0375	0.0358	0.0386	0.0455	0.0415
AEA(18:0)	AEA	N-acyl ethanolamines	21	M+H	AEA(18:0)	AEA(18:0)	(18:0)	(18:0)	327.314	6.017	C20 H41 N1 O2	1	1	0	66.7	C	0.0123	0.016	0.0135	0.0183	0.0151	0.0178	0.0265	0.021	0.0264	0.0265	0.024	0.0243	0.0397	0.0328	0.034	0.0156	0.013	0.0181	0.0179	0.0259	0.0249
AEA(18:0)	AEA	N-acyl ethanolamines	22	M+H	AEA(18:0)	AEA(18:0)	(18:0)	(18:0)	327.314	8.355	C20 H41 N1 O2	1	1	0	100	C	0.0238	0.0228	0.0214	0.0238	0.023	0.0219	0.0209	0.0228	0.024	0.0236	0.021	0.0233	0.0227	0.0245	0.024	0.029	0.0272	0.0275	0.0245	0.0284	0.0281
AEA(22:6)	AEA	N-acyl ethanolamines	27	M+H	AEA(22:6)	AEA(22:6)	(22:6)	(22:6)	371.282	6.087	C24 H37 N1 O2	1	1	1	100	B	0.0089	0.0081	0.0091	0.0084	0.0075	0.0074	0.0071	0.0074	0.008	0.0083	0.008	0.0086	0.0084	0.0084	0.0094	0.0093	0.0085	0.0086	0.0077	0.0096	0.0097
Cer(d18:1_18:0)	Cer	acylsphingosines	1063	M+H	Cer(d36:1)	Cer(d36:1)	(d18:1_18:0)	(d36:1)	565.543	20.164	C36 H71 N1 O3	4	1	1	100	A	9.0598	8.9268	7.3834	7.3863	6.9367	6.667	7.914	7.2226	7.7749	6.641	6.4217	5.5197	8.6315	8.6223	8.0123	11.0482	9.8204	9.6826	8.4438	7.6845	8.7659
ChE(16:1)	ChE	sterolEsters	1353	M+NH4	ChE(16:1)	ChE(16:1)	(16:1)	(16:1)	622.569	23.786	C43 H74 O2	1	1	0	100	A	0.0195	0.0203	0.0188	0.0349	0.0347	0.0359	0.0204	0.0258	0.0251	0.058	0.0392	0.0825	0.0787	0.0564	0.0472	0.0476	0.0464	0.0633	0.0384	0.0335	0.0277
ChE(17:1)	ChE	sterolEsters	1361	M+NH4	ChE(17:1)	ChE(17:1)	(17:1)	(17:1)	636.585	23.955	C44 H76 O2	1	1	0	100	A	0.0067	0.0086	0.0071	0.018	0.025	0.0225	0.0063	0.0089	0.009	0.0172	0.0212	0.0381	0.112	0.0655	0.057	0.0251	0.0267	0.0263	0.0355	0.0332	0.0221
ChE(18:2)	ChE	sterolEsters	1375	M+NH4	ChE(18:2)	ChE(18:2)	(18:2)	(18:2)	648.585	23.807	C45 H76 O2	1	1	0	100	A	0.0358	0.0348	0.0303	0.053	0.0563	0.0612	0.0352	0.041	0.0403	0.0845	0.0704	0.0921	0.087	0.0779	0.072	0.0732	0.0668	0.0783	0.0652	0.0657	0.048
ChE(18:1)	ChE	sterolEsters	1378	M+NH4	ChE(18:1)	ChE(18:1)	(18:1)	(18:1)	650.6	24.155	C45 H78 O2	1	1	0	66.7	A	0.0299	0.035	0.0323	0.0314	0.0317	0.0291	0.0309	0.0324	0.0324	0.0396	0.0321	0.0395	0.0441	0.04	0.0338	0.0341	0.0329	0.0321	0.0391	0.033	0.0413
ChE(20:4)	ChE	sterolEsters	1482	M+NH4	ChE(20:4)	ChE(20:4)	(20:4)	(20:4)	672.585	23.613	C47 H76 O2	1	1	0	100	A	0.2512	0.2501	0.2519	0.3389	0.3561	0.3618	0.2406	0.2266	0.2718	0.4439	0.4601	0.4972	0.4168	0.4386	0.4331	0.414	0.4006	0.4084	0.3875	0.4466	0.422
ChE(22:4)	ChE	sterolEsters	1600	M+NH4	ChE(22:4)	ChE(22:4)	(22:4)	(22:4)	700.616	23.888	C49 H80 O2	1	1	0	100	A	0.0125	0.0118	0.0119	0.0165	0.0166	0.0169	0.0111	0.0136	0.0129	0.0191	0.0179	0.0204	0.0182	0.0168	0.0174	0.0193	0.0217	0.0225	0.0188	0.0191	0.0229
Co(Q8)	Co	Coenzyme Q	1987	M+NH4	Co(Q8)	Co(Q8)	(Q8)	(Q8)	726.559	21.692	C49 H74 O4	1	1	0	100	A	0.0147	0.015	0.0129	0.0117	0.0117	0.0133	0.0154	0.0144	0.0176	0.0113	0.0152	0.0142	0.0142	0.0115	0.0156	0.0175	0.017	0.0158	0.0171	0.0138	0.011
Co(Q9)	Co	Coenzyme Q	1996	M+NH4	Co(Q9)	Co(Q9)	(Q9)	(Q9)	794.621	22.23	C54 H82 O4	2	1	0	100	A	1.3045	1.2209	1.2846	1.144	1.1674	1.1391	1.1916	1.151	1.4876	1.2683	1.4375	1.4307	1.2177	0.9981	1.2444	1.3869	1.2937	1.1357	1.6466	1.393	1.2871
Co(Q10)	Co	Coenzyme Q	2020	M+NH4	Co(Q10)	Co(Q10)	(Q10)	(Q10)	862.684	22.684	C59 H90 O4	2	1	0	100	A	0.5748	0.5594	0.5666	0.4531	0.5413	0.5391	0.5174	0.5178	0.6993	0.6018	0.7609	0.5849	0.5743	0.5876	0.5597	0.5535	0.4761	0.5214	0.6735	0.609	0.607
DG(8:0_16:0)	DG	diacyl	548	M+NH4	DG(24:0)	DG(24:0)	(8:0_16:0)	(24:0)	456.381	12.698	C27 H52 O5	2	2	0	100	A	1e-07	1e-07	0.0002	0.0033	0.004	0.0036	0.0005	0.0006	0.0007	0.0242	0.0223	0.0222	0.0213	0.0163	0.0161	0.0028	0.0026	0.0033	0.0127	0.0116	0.0165
DG(8:0_18:0)	DG	diacyl	568	M+NH4	DG(26:0)	DG(26:0)	(8:0_18:0)	(26:0)	484.413	15.276	C29 H56 O5	1	2	0	100	A	1e-07	1e-07	1e-07	0.0025	0.0037	0.0035	0.0003	0.0004	0.0002	0.0445	0.042	0.0379	0.0348	0.0244	0.0252	0.0019	0.0011	0.0026	0.0199	0.0152	0.0209
DG(14:0_16:0)	DG	diacyl	580	M+NH4	DG(30:0)	DG(30:0)	(14:0_16:0)	(30:0)	540.475	20.027	C33 H64 O5	1	2	1	66.7	A	0.0098	0.0096	0.0101	0.0277	0.024	0.0231	0.013	0.01	0.0144	0.4906	0.5119	0.4901	0.2378	0.2815	0.2198	0.0328	0.0221	0.0294	0.2004	0.1812	0.1749
DG(15:0_16:0)	DG	diacyl	804	M+NH4	DG(31:0)	DG(31:0)	(15:0_16:0)	(31:0)	554.491	20.51	C34 H66 O5	1	1	1	66.7	A	0.0024	0.0032	0.0034	0.0041	0.0047	0.0051	0.0034	0.0033	0.0032	0.0279	0.0325	0.0316	0.0411	0.0341	0.03	0.0048	0.0054	0.0077	0.014	0.0131	0.0152
DG(O-13:0_21:2)	DG	alkyl-acyl	586	M+NH4	DG(O-34:2)	DG(O-34:2)	(O-13:0_21:2)	(O-34:2)	578.527	21.418	C37 H70 O4	1	1	0	100	B	0.0469	0.0547	0.0371	0.0256	0.0296	0.0275	0.0433	0.0323	0.0381	0.0298	0.0281	0.0289	0.032	0.0429	0.0316	0.033	0.0355	0.0311	0.0184	0.0241	0.0289
DG(16:0_17:1)	DG	diacyl	807	M+NH4	DG(33:1)	DG(33:1)	(16:0_17:1)	(33:1)	580.507	20.573	C36 H68 O5	1	1	1	66.7	A	0.0085	0.0102	0.0066	0.007	0.0075	0.0086	0.0082	0.0076	0.0081	0.0087	0.0086	0.012	0.0292	0.0259	0.0204	0.0094	0.0075	0.0103	0.0141	0.0118	0.0116
DG(16:0_17:0)	DG	diacyl	591	M+NH4	DG(33:0)	DG(33:0)	(16:0_17:0)	(33:0)	582.522	21.212	C36 H70 O5	1	1	1	100	A	0.0066	0.0075	0.007	0.0074	0.0119	0.0105	0.0068	0.0087	0.0074	0.0631	0.0743	0.0829	0.0869	0.0855	0.0598	0.0109	0.0133	0.0137	0.0206	0.025	0.016
DG(16:0_18:2)	DG	diacyl	599	M+NH4	DG(34:2)	DG(34:2)	(16:0_18:2)	(34:2)	592.507	20.331	C37 H68 O5	1	1	1	100	A	0.0425	0.0538	0.0569	0.0269	0.0421	0.0525	0.0392	0.0451	0.0663	0.0318	0.0422	0.0477	0.0299	0.0388	0.038	0.0393	0.0535	0.0698	0.0515	0.0512	0.0529
DG(16:0_18:1)	DG	diacyl	600	M+NH4	DG(34:1)	DG(34:1)	(16:0_18:1)	(34:1)	594.522	20.939	C37 H70 O5	1	1	4	66.7	A	0.982	1.2068	0.7899	0.6086	0.6755	0.6637	0.723	0.6066	0.7475	0.7444	0.6596	0.663	0.8533	0.8785	0.6907	0.7816	0.8176	0.8097	0.9067	0.8811	0.6891
DG(16:0_18:0)	DG	diacyl	587	M+NH4	DG(34:0)	DG(34:0)	(16:0_18:0)	(34:0)	596.538	21.474	C37 H72 O5	3	1	2	100	A	0.1535	0.1837	0.1549	0.1993	0.1887	0.1718	0.1755	0.1323	0.1799	3.9233	4.9804	4.3949	1.8486	2.7532	1.5327	0.3386	0.2235	0.3289	0.7471	0.7666	0.9033
DG(O-15:0_21:2)	DG	alkyl-acyl	605	M+NH4	DG(O-36:2)	DG(O-36:2)	(O-15:0_21:2)	(O-36:2)	606.559	21.509	C39 H74 O4	1	1	0	66.7	B	0.0224	0.0249	0.0187	0.0135	0.0148	0.0153	0.021	0.0181	0.02	0.0122	0.0136	0.0152	0.0177	0.0215	0.0133	0.0185	0.0178	0.0208	0.0112	0.0082	0.0109
DG(17:0_18:1)	DG	diacyl	610	M+NH4	DG(35:1)	DG(35:1)	(17:0_18:1)	(35:1)	608.538	21.243	C38 H72 O5	1	1	1	100	A	0.0304	0.0349	0.0263	0.0192	0.0198	0.0202	0.0275	0.0244	0.0259	0.0217	0.0221	0.0252	0.0418	0.0415	0.0315	0.0246	0.0239	0.0247	0.0214	0.0223	0.0152
DG(17:0_18:0)	DG	diacyl	615	M+NH4	DG(35:0)	DG(35:0)	(17:0_18:0)	(35:0)	610.554	21.688	C38 H74 O5	1	1	1	100	A	0.0024	0.0025	0.0026	0.0023	0.0037	0.0032	0.002	0.0033	0.0031	0.0163	0.0225	0.0272	0.0318	0.0309	0.0252	0.0043	0.0051	0.0062	0.005	0.0048	0.0062
DG(18:1_18:2)	DG	diacyl	628	M+NH4	DG(36:3)	DG(36:3)	(18:1_18:2)	(36:3)	618.522	20.406	C39 H70 O5	1	2	1	66.7	A	0.0352	0.0449	0.0298	0.0227	0.0261	0.0251	0.0322	0.0334	0.0333	0.0262	0.0239	0.0245	0.0311	0.0402	0.0292	0.0323	0.0318	0.0336	0.0308	0.0373	0.0329
DG(16:0_20:3)	DG	diacyl	629	M+NH4	DG(36:3)	DG(36:3)	(16:0_20:3)	(36:3)	618.522	20.559	C39 H70 O5	1	2	1	100	A	0.0609	0.0711	0.0488	0.0375	0.0389	0.039	0.0568	0.0491	0.0464	0.0339	0.0364	0.0324	0.0395	0.0404	0.0371	0.0451	0.0445	0.044	0.0575	0.053	0.0505
DG(18:0_18:1)	DG	diacyl	633	M+NH4	DG(36:1)	DG(36:1)	(18:0_18:1)	(36:1)	622.554	21.482	C39 H74 O5	1	2	1	66.7	A	1.0015	0.9609	0.7501	0.5141	0.6103	0.5829	0.8716	0.7191	0.8702	0.6883	0.6616	0.5913	0.8148	0.9343	0.602	0.7615	0.7376	0.8105	0.4597	0.4246	0.5147
DG(17:0_20:4)	DG	diacyl	644	M+NH4	DG(37:4)	DG(37:4)	(17:0_20:4)	(37:4)	630.522	20.624	C40 H70 O5	1	1	1	100	A	0.0245	0.0302	0.0198	0.0185	0.0179	0.0143	0.0183	0.0167	0.0191	0.0121	0.0101	0.012	0.0155	0.0168	0.0147	0.0155	0.0158	0.0157	0.0158	0.018	0.0153
DG(19:0_18:1)	DG	diacyl	654	M+NH4	DG(37:1)	DG(37:1)	(19:0_18:1)	(37:1)	636.569	21.678	C40 H76 O5	1	1	1	66.7	A	0.0121	0.0143	0.0093	0.0053	0.0075	0.0063	0.0106	0.0089	0.0104	0.004	0.0045	0.0053	0.0076	0.0086	0.0071	0.0088	0.0102	0.0101	0.0041	0.0039	0.0049
DG(18:2_20:4)	DG	diacyl	662	M+NH4	DG(38:6)	DG(38:6)	(18:2_20:4)	(38:6)	640.507	19.055	C41 H68 O5	1	2	1	66.7	A	0.008	0.0078	0.006	0.0051	0.0055	0.0049	0.0071	0.0048	0.0054	0.0039	0.0037	0.0036	0.0057	0.0076	0.0064	0.0054	0.0062	0.0068	0.0082	0.0081	0.0093
DG(16:0_22:6)	DG	diacyl	664	M+NH4	DG(38:6)	DG(38:6)	(16:0_22:6)	(38:6)	640.507	19.841	C41 H68 O5	1	2	1	100	A	0.097	0.1216	0.0976	0.0888	0.0874	0.0855	0.1008	0.0881	0.0944	0.0727	0.07	0.0775	0.088	0.1016	0.0856	0.094	0.0979	0.0896	0.133	0.1189	0.1205
DG(18:1_20:4)	DG	diacyl	668	M+NH4	DG(38:5)	DG(38:5)	(18:1_20:4)	(38:5)	642.522	20.24	C41 H70 O5	2	2	1	100	A	0.2126	0.3023	0.2142	0.1606	0.191	0.1852	0.1777	0.1725	0.2232	0.1262	0.1464	0.1571	0.168	0.1931	0.1534	0.1979	0.2281	0.2438	0.2755	0.262	0.1943
DG(18:0_20:5)	DG	diacyl	669	M+NH4	DG(38:5)	DG(38:5)	(18:0_20:5)	(38:5)	642.522	20.513	C41 H70 O5	1	2	1	66.7	A	0.0107	0.0103	0.0088	0.0065	0.0071	0.0078	0.0084	0.0071	0.0104	0.006	0.0083	0.0071	0.0079	0.0086	0.0055	0.0098	0.0106	0.0104	0.0118	0.0114	0.0076
DG(18:1_20:3)	DG	diacyl	675	M+NH4	DG(38:4)	DG(38:4)	(18:1_20:3)	(38:4)	644.538	20.622	C41 H72 O5	1	3	1	100	A	0.0224	0.0247	0.0172	0.0148	0.0159	0.0152	0.0189	0.0166	0.0198	0.0121	0.0084	0.0111	0.0145	0.0173	0.0128	0.014	0.0152	0.0157	0.0173	0.0174	0.0145
DG(16:0_22:4)	DG	diacyl	676	M+NH4	DG(38:4)	DG(38:4)	(16:0_22:4)	(38:4)	644.538	20.782	C41 H72 O5	1	3	1	100	A	0.0497	0.0465	0.0279	0.0248	0.0253	0.0268	0.0386	0.0334	0.0333	0.0242	0.0233	0.0276	0.0309	0.0367	0.0274	0.0323	0.034	0.0333	0.0347	0.0433	0.0324
DG(18:0_20:3)	DG	diacyl	687	M+NH4	DG(38:3)	DG(38:3)	(18:0_20:3)	(38:3)	646.554	21.382	C41 H74 O5	1	1	1	66.7	A	0.0267	0.0261	0.0182	0.0197	0.019	0.018	0.0238	0.0191	0.0167	0.0148	0.0136	0.0145	0.0167	0.0214	0.0185	0.0171	0.0217	0.0247	0.0127	0.0125	0.0115
DG(18:0_20:2)	DG	diacyl	692	M+NH4	DG(38:2)	DG(38:2)	(18:0_20:2)	(38:2)	648.569	21.481	C41 H76 O5	1	1	1	100	A	0.152	0.1632	0.1192	0.0775	0.0944	0.0912	0.1259	0.1091	0.1397	0.0787	0.0827	0.0771	0.113	0.1227	0.0872	0.1162	0.1138	0.1272	0.0685	0.0653	0.0814
DG(18:0_20:0)	DG	diacyl	697	M+NH4	DG(38:0)	DG(38:0)	(18:0_20:0)	(38:0)	652.601	22.198	C41 H80 O5	1	1	2	100	A	0.0071	0.0082	0.0068	0.0048	0.0042	0.0043	0.0055	0.0052	0.0068	0.0236	0.0325	0.0272	0.0154	0.0196	0.0141	0.0062	0.0077	0.0085	0.0067	0.0058	0.0076
DG(19:0_20:4)	DG	diacyl	700	M+NH4	DG(39:4)	DG(39:4)	(19:0_20:4)	(39:4)	658.554	21.273	C42 H74 O5	1	1	1	66.7	A	0.0092	0.0114	0.0064	0.0061	0.0064	0.0062	0.0075	0.0055	0.0074	0.0058	0.0048	0.0049	0.0068	0.0076	0.0069	0.0074	0.0073	0.0079	0.0045	0.0042	0.0052
[truncated: 490 more rows]

## Sheet: Liver
Table S4: Characterization and quantification of mouse liver lipidome using the six tested extraction methods																Conc (uM)
[truncated: 676 more rows]

[truncated: 2 more sheets: Intestine, Plasma]
